# Supplementary material for: Time-resolved proximity proteomics uncovers a membrane tension-sensitive caveolin-1 interactome at the rear of migrating cells
Source: eLife. 2024 Sep 24;13:e85601. doi: 10.7554/eLife.85601 (PMC11509677; doi:10.7554/eLife.85601)
Supplement: Supplementary file 1. [file elife-85601-supp1.xlsx]

## Sheet: Overview
		Sheet	Description
		Overview	Overview and description of all included workbook sheets
		CoRec	List of proteins enriched in NT and REC samples and their mapping to GO terms and CORUM complexes
		Hypo	List of proteins enriched after osmotic shock (Hypo only) and their mapping to GO terms and CORUM complexes
		NonRec	List of proteins that do not recover (enriched in REC and Hypo) and their mapping to GO terms and CORUM complexes
		all protein (no background)	Proteins after removal of all identifications in the NES control
		all identified	All proteins identified in the study

## Sheet: CoRec
Uniprot_ID	id	Protein.names	GOCC.name	KEGG.name	Corum
A0A0U1RR22	PACSIN2	Protein kinase C and casein kinase substrate in neurons protein 2	adherens junction;anchoring junction;caveola;cell junction;cell part;cell projection membrane;cell projection part;cell-cell junction;cell-substrate adherens junction;cell-substrate junction;cytoplasm;cytoplasmic part;cytoplasmic vesicle membrane;cytoplasmic vesicle part;cytoskeleton;cytosol;early endosome;endosomal part;endosome;endosome membrane;extracellular membrane-bounded organelle;extracel…
A0A1B0GTU4	PXN	Paxillin	actin filament bundle;actomyosin;adherens junction;anchoring junction;cell cortex;cell junction;cell part;cell projection;cell-substrate adherens junction;cell-substrate junction;cytoplasm;cytoplasmic part;cytoskeletal part;cytoskeleton;cytosol;focal adhesion;intracellular non-membrane-bounded organelle;intracellular organelle;intracellular organelle part;intracellular part;lamellipodium;macromol…	Bacterial invasion of epithelial cells;Chemokine signaling pathway;Focal adhesion;Leukocyte transendothelial migration;Regulation of actin cytoskeleton;VEGF signaling pathway	DDEF1-CTTN-PXN complex;ITGA4-ITGB1-PXN complex;ITGA4-PXN-GIT1 complex;ITGAV-ITGB3-PXN-PTK2b complex;Polycystin-1 multiprotein complex (ACTN1, CDH1, SRC, JUP, VCL, CTNNB1, PXN, BCAR1, PKD1, PTK2, TLN1);PXN-ITGB5-PTK2 complex
B4DDF4	CNN2	Calponin;Calponin-2	actin filament bundle;actomyosin;adherens junction;anchoring junction;cell junction;cell part;cell-cell junction;cell-substrate adherens junction;cell-substrate junction;cytoskeletal part;cytoskeleton;extracellular membrane-bounded organelle;extracellular organelle;extracellular region part;extracellular vesicular exosome;focal adhesion;intracellular non-membrane-bounded organelle;intracellular o…
E7EX44	CALD1	Caldesmon	actin cap;actin cytoskeleton;cell cortex part;cell part;contractile fiber;cytoplasmic part;cytoskeletal part;cytoskeleton;cytosol;intracellular non-membrane-bounded organelle;intracellular organelle;intracellular organelle part;intracellular part;membrane;myofibril;non-membrane-bounded organelle;organelle;organelle part;plasma membrane	Vascular smooth muscle contraction
E9PGF5	TNS1	Tensin-1	adherens junction;anchoring junction;cell junction;cell part;cell surface;cell-substrate adherens junction;cell-substrate junction;cytoplasm;cytoskeleton;focal adhesion;intracellular non-membrane-bounded organelle;intracellular organelle;intracellular part;non-membrane-bounded organelle;organelle
O14964	HGS	Hepatocyte growth factor-regulated tyrosine kinase substrate	cell part;cytoplasm;cytoplasmic membrane-bounded vesicle;cytoplasmic part;cytoplasmic vesicle;cytosol;early endosome;early endosome membrane;endosomal part;endosome;endosome membrane;extracellular membrane-bounded organelle;extracellular organelle;extracellular region part;extracellular vesicular exosome;intracellular membrane-bounded organelle;intracellular organelle;intracellular organelle part…	Endocytosis;Phagosome	RIN1-STAM2-HRS complex;SNARE complex (HGS, SNAP25, STX13)
O15042	U2SURP	U2 snRNP-associated SURP motif-containing protein	cell part;intracellular membrane-bounded organelle;intracellular organelle;intracellular organelle part;intracellular part;membrane-bounded organelle;nuclear part;nucleoplasm;nucleus;organelle;organelle part	Spliceosome	17S U2 snRNP;Spliceosome
O75369	FLNB	Filamin-B	actin cytoskeleton;actin filament bundle;actomyosin;adherens junction;anchoring junction;cell cortex;cell junction;cell part;cell-substrate adherens junction;cell-substrate junction;contractile fiber part;cytoplasm;cytoplasmic part;cytoskeletal part;cytoskeleton;cytosol;extracellular membrane-bounded organelle;extracellular organelle;extracellular region part;extracellular vesicular exosome;focal…	Focal adhesion;MAPK signaling pathway
O94915	FRYL	Protein furry homolog-like
P06748	NPM1	Nucleophosmin	adherens junction;anchoring junction;cell junction;cell part;cell-substrate adherens junction;cell-substrate junction;centrosome;cytoplasm;cytoplasmic part;cytoskeletal part;cytosol;focal adhesion;intracellular membrane-bounded organelle;intracellular non-membrane-bounded organelle;intracellular organelle;intracellular organelle part;intracellular part;macromolecular complex;membrane;membrane-bou…		ARF-Mule complex;CTCF-nucleophosmin complex;CTCF-nucleophosmin-PARP-HIS-KPNA-LMNA-TOP complex;H2AX complex I;H2AX complex II;H2AX complex, isolated from cells without IR exposure;Nop56p-associated pre-rRNA complex;TLE1 corepressor complex (MASH1 promoter-corepressor complex)
P20073	ANXA7	Annexin A7	cell part;cytoplasmic part;cytosol;endoplasmic reticulum membrane;endoplasmic reticulum part;envelope;extracellular membrane-bounded organelle;extracellular organelle;extracellular region part;extracellular vesicular exosome;intracellular membrane-bounded organelle;intracellular organelle;intracellular organelle part;intracellular part;membrane;membrane part;membrane-bounded organelle;membrane-bo…
P21333	FLNA	Filamin-A	actin cytoskeleton;actin filament;adherens junction;anchoring junction;cell body;cell cortex part;cell junction;cell part;cell projection part;cell-substrate adherens junction;cell-substrate junction;chromosomal part;cortical cytoskeleton;cytoplasm;cytoplasmic part;cytoskeletal part;cytoskeleton;cytosol;dendritic shaft;extracellular membrane-bounded organelle;extracellular organelle;extracellular…	Focal adhesion;MAPK signaling pathway
P26006	ITGA3	Integrin alpha-3;Integrin alpha-3 heavy chain;Integrin alpha-3 light chain	adherens junction;alpha3-beta1 integrin complex;anchoring junction;basolateral plasma membrane;cell junction;cell part;cell periphery;cell projection membrane;cell projection part;cell surface;cell-substrate adherens junction;cell-substrate junction;cytoplasmic part;excitatory synapse;external side of plasma membrane;extracellular membrane-bounded organelle;extracellular organelle;extracellular r…	Arrhythmogenic right ventricular cardiomyopathy (ARVC);Dilated cardiomyopathy;ECM-receptor interaction;Focal adhesion;Hematopoietic cell lineage;Hypertrophic cardiomyopathy (HCM);Pathways in cancer;Regulation of actin cytoskeleton;Small cell lung cancer	ITGA3-ITGB1 complex;ITGA3-ITGB1-BSG complex;ITGA3-ITGB1-CD151 complex;ITGA3-ITGB1-CD63 complex;ITGA3-ITGB1-THBS1 complex
P30050	RPL12	60S ribosomal protein L12	adherens junction;anchoring junction;cell junction;cell part;cell-substrate adherens junction;cell-substrate junction;cytoplasmic part;cytosol;cytosolic large ribosomal subunit;extracellular membrane-bounded organelle;extracellular organelle;extracellular region part;extracellular vesicular exosome;focal adhesion;intracellular organelle part;intracellular part;large ribosomal subunit;macromolecul…	Ribosome	60S ribosomal subunit, cytoplasmic;Nop56p-associated pre-rRNA complex;Ribosome, cytoplasmic;TRBP containing complex (DICER, RPL7A, EIF6, MOV10 and subunits of the 60S ribosomal particle)
P46939	UTRN	Utrophin	cell junction;cell part;cell projection;cell projection membrane;cell projection part;contractile fiber;cytoplasm;cytoplasmic part;cytoskeleton;dystrophin-associated glycoprotein complex;extracellular membrane-bounded organelle;extracellular organelle;extracellular region part;extracellular vesicular exosome;filopodium;filopodium membrane;intracellular non-membrane-bounded organelle;intracellular…		UTM-SGCE-DAG1-CAV1-NOS3 complex
P50995	ANXA11	Annexin A11	azurophil granule;cell part;cytoplasm;cytoplasmic membrane-bounded vesicle;cytoplasmic part;cytoplasmic vesicle;cytoskeletal part;endocytic vesicle;envelope;extracellular membrane-bounded organelle;extracellular organelle;extracellular region part;extracellular vesicular exosome;intracellular membrane-bounded organelle;intracellular non-membrane-bounded organelle;intracellular organelle;intracell…
Q13111	CHAF1A	Chromatin assembly factor 1 subunit A	CAF-1 complex;cell part;chromatin;chromatin assembly complex;chromosomal part;intracellular organelle part;intracellular part;macromolecular complex;nuclear chromatin;nuclear chromosome part;nuclear part;organelle part;protein complex		ASF1-interacting protein complex;Chromatin assembly complex (CAF-1 complex);Histone H3.1 complex;Replication-coupled CAF-1-MBD1-ETDB1 complex;WINAC complex
Q14247	CTTN	Src substrate cortactin	adherens junction;anchoring junction;cell cortex;cell cortex part;cell junction;cell part;cell projection;cell projection part;cell-substrate adherens junction;cell-substrate junction;coated pit;cortical cytoskeleton;cytoplasm;cytoplasmic part;cytoskeletal part;cytoskeleton;dendritic spine;extracellular membrane-bounded organelle;extracellular organelle;extracellular region part;extracellular ves…	Bacterial invasion of epithelial cells;Pathogenic Escherichia coli infection;Shigellosis;Tight junction	DDEF1-CTTN-PXN complex;Hip1R-cortactin complex
Q14315	FLNC	Filamin-C	adherens junction;anchoring junction;cell junction;cell part;cell-substrate adherens junction;cell-substrate junction;contractile fiber part;costamere;cytoplasm;cytoplasmic part;cytoskeleton;cytosol;focal adhesion;intracellular non-membrane-bounded organelle;intracellular organelle;intracellular part;membrane;non-membrane-bounded organelle;organelle;organelle part;plasma membrane;sarcolemma;sarco…	Focal adhesion;MAPK signaling pathway
Q43758	APEX2-EGFP	APEX2-EGFP fusion construct
Q52LW3	ARHGAP29	Rho GTPase-activating protein 29	cell part;cytoplasmic part;cytosol;intracellular;intracellular part
Q6NZI2	PTRF	Polymerase I and transcript release factor	caveola;cell part;cytoplasm;cytoplasmic part;cytosol;endoplasmic reticulum;intracellular membrane-bounded organelle;intracellular organelle;intracellular organelle part;intracellular part;macromolecular complex;membrane;membrane part;membrane raft;membrane-bounded organelle;mitochondrion;nuclear part;nucleoplasm;nucleus;organelle;organelle part;plasma membrane;plasma membrane part;protein complex
Q8WUM4	PDCD6IP	Programmed cell death 6-interacting protein	adherens junction;anchoring junction;cell junction;cell part;cell-substrate adherens junction;cell-substrate junction;cytoplasm;cytoplasmic membrane-bounded vesicle;cytoplasmic part;cytoplasmic vesicle;cytoskeletal part;cytosol;endoplasmic reticulum exit site;endoplasmic reticulum part;extracellular membrane-bounded organelle;extracellular organelle;extracellular region part;extracellular vesicul…	Endocytosis
Q93052	LPP	Lipoma-preferred partner	adherens junction;anchoring junction;cell junction;cell part;cell-substrate adherens junction;cell-substrate junction;cytoplasm;focal adhesion;intracellular membrane-bounded organelle;intracellular organelle;intracellular part;membrane;membrane-bounded organelle;nucleus;organelle;plasma membrane
Q9H307	PNN	Pinin	anchoring junction;catalytic step 2 spliceosome;cell junction;cell part;cell-cell junction;cytoplasm;cytoskeletal part;desmosome;intermediate filament;intracellular organelle part;intracellular part;macromolecular complex;membrane;nuclear body;nuclear part;nuclear speck;nucleoplasm;nucleoplasm part;organelle part;plasma membrane;protein complex;ribonucleoprotein complex;spliceosomal complex	mRNA surveillance pathway;RNA transport	C complex spliceosome
Q9NZN4	EHD2	EH domain-containing protein 2	caveola;cell part;cytoplasmic part;endosomal part;endosome membrane;extracellular membrane-bounded organelle;extracellular organelle;extracellular region part;extracellular vesicular exosome;intracellular membrane-bounded organelle;intracellular organelle;intracellular organelle part;intracellular part;membrane;membrane part;membrane raft;membrane-bounded organelle;membrane-bounded vesicle;nucleu…	Endocytosis

## Sheet: Hypo
Uniprot_ID	id	Protein.names	GOCC.name	KEGG.name	Corum
A0A087WXM6	RPL17;RPL17-C18orf32	60S ribosomal protein L17	cell part;cytoplasmic part;cytosol;cytosolic large ribosomal subunit;intracellular membrane-bounded organelle;intracellular organelle;intracellular organelle part;intracellular part;large ribosomal subunit;macromolecular complex;membrane-bounded organelle;nucleus;organelle;organelle part;ribonucleoprotein complex	Ribosome	60S ribosomal subunit, cytoplasmic;Nop56p-associated pre-rRNA complex;Ribosome, cytoplasmic
A0A0C4DGB1	DIMT1	Probable dimethyladenosine transferase	cell part;cytoplasm;intracellular membrane-bounded organelle;intracellular non-membrane-bounded organelle;intracellular organelle;intracellular organelle part;intracellular part;membrane-bounded organelle;non-membrane-bounded organelle;nuclear part;nucleolus;nucleus;organelle;organelle part
A0A3F2YNY6	PRPF40A	Pre-mRNA-processing factor 40 homolog A	cell part;cytoplasm;intracellular organelle part;intracellular part;membrane;nuclear body;nuclear matrix;nuclear part;nuclear speck;nucleoplasm;nucleoplasm part;organelle part	Spliceosome	Spliceosome
C9JJ19	MRPS34	28S ribosomal protein S34, mitochondrial	cell part;cytoplasmic part;intracellular membrane-bounded organelle;intracellular non-membrane-bounded organelle;intracellular organelle;intracellular organelle part;intracellular part;macromolecular complex;membrane;membrane-bounded organelle;mitochondrial inner membrane;mitochondrial membrane;mitochondrial part;mitochondrion;non-membrane-bounded organelle;organelle;organelle inner membrane;orga…		28S ribosomal subunit, mitochondrial;55S ribosome, mitochondrial
E9PJK1	CD81	Tetraspanin;CD81 antigen	adherens junction;anchoring junction;cell junction;cell part;cell-substrate adherens junction;cell-substrate junction;extracellular membrane-bounded organelle;extracellular organelle;extracellular region part;extracellular vesicular exosome;focal adhesion;immunological synapse;integral to membrane;integral to plasma membrane;intrinsic to membrane;intrinsic to plasma membrane;membrane;membrane par…	B cell receptor signaling pathway;Hepatitis C;Malaria	GPR56-CD81-Galphaq/11-Gbeta complex;ITGA4-ITGB1-CD81 complex
H0YE57	DHCR7	7-dehydrocholesterol reductase	cell part;cytoplasmic part;endoplasmic reticulum;endoplasmic reticulum membrane;endoplasmic reticulum part;integral to membrane;intracellular membrane-bounded organelle;intracellular organelle;intracellular organelle part;intracellular part;intrinsic to membrane;membrane;membrane part;membrane-bounded organelle;nuclear membrane;nuclear outer membrane;nuclear part;organelle;organelle membrane;orga…	Steroid biosynthesis
H3BNC9	RPS17	40S ribosomal protein S17	adherens junction;anchoring junction;cell junction;cell part;cell-substrate adherens junction;cell-substrate junction;cytoplasmic part;cytosol;cytosolic small ribosomal subunit;extracellular membrane-bounded organelle;extracellular organelle;extracellular region part;extracellular vesicular exosome;focal adhesion;intracellular non-membrane-bounded organelle;intracellular organelle;intracellular o…	Ribosome	40S ribosomal subunit, cytoplasmic;Nop56p-associated pre-rRNA complex;Ribosome, cytoplasmic
H7BYN4	KIF23	Kinesin-like protein;Kinesin-like protein KIF23	adherens junction;anchoring junction;cell junction;cell part;cell-substrate adherens junction;cell-substrate junction;centralspindlin complex;centrosome;cytoplasmic part;cytoskeletal part;cytosol;extracellular region part;focal adhesion;intercellular bridge;intracellular membrane-bounded organelle;intracellular non-membrane-bounded organelle;intracellular organelle;intracellular organelle part;in…		CEN complex
I3L3X5	TMEM256-PLSCR3;PLSCR3	Phospholipid scramblase 3	cell part;cytoplasmic part;integral to membrane;intracellular organelle part;intracellular part;intrinsic to membrane;membrane;membrane part;mitochondrial membrane;mitochondrial part;organelle membrane;organelle part;plasma membrane
M0R117	RPL18A	60S ribosomal protein L18a	cell part;cytoplasmic part;cytosol;cytosolic large ribosomal subunit;intracellular non-membrane-bounded organelle;intracellular organelle;intracellular organelle part;intracellular part;large ribosomal subunit;macromolecular complex;membrane;non-membrane-bounded organelle;organelle;organelle part;ribonucleoprotein complex;ribosome	Ribosome	60S ribosomal subunit, cytoplasmic;Nop56p-associated pre-rRNA complex;Ribosome, cytoplasmic;TRBP containing complex (DICER, RPL7A, EIF6, MOV10 and subunits of the 60S ribosomal particle)
M0R3F1	HNRNPUL1	Heterogeneous nuclear ribonucleoprotein U-like protein 1	cell part;intracellular membrane-bounded organelle;intracellular organelle;intracellular organelle part;intracellular part;macromolecular complex;membrane-bounded organelle;nuclear part;nucleoplasm;nucleus;organelle;organelle part;ribonucleoprotein complex;viral nucleocapsid;virion part		Large Drosha complex
O15400	STX7	Syntaxin-7	azurophil granule;cell part;cytoplasmic membrane-bounded vesicle;cytoplasmic part;cytoplasmic vesicle;early endosome;early endosome membrane;endocytic vesicle;endomembrane system;endosomal part;endosome;endosome membrane;extracellular membrane-bounded organelle;extracellular organelle;extracellular region part;extracellular vesicular exosome;immunological synapse;integral to membrane;intracellula…	Phagosome;SNARE interactions in vesicular transport	Class C Vps complex (VPS11, VPS18, STX7)
O43583	DENR	Density-regulated protein
O60292	SIPA1L3	Signal-induced proliferation-associated 1-like protein 3	extracellular region part;extracellular space
O75367	H2AFY	Core histone macro-H2A.1;Histone H2A	Barr body;cell part;centromeric heterochromatin;chromatin;chromosomal part;chromosome;condensed chromosome;extracellular membrane-bounded organelle;extracellular organelle;extracellular region part;extracellular vesicular exosome;heterochromatin;intracellular membrane-bounded organelle;intracellular non-membrane-bounded organelle;intracellular organelle;intracellular organelle part;intracellular …	Systemic lupus erythematosus	Ubiquitin E3 ligase (H2AFY, SPOP, CUL3)
O75475	PSIP1	PC4 and SFRS1-interacting protein	cell part;chromatin;chromosomal part;cytoplasmic part;cytosol;heterochromatin;intracellular membrane-bounded organelle;intracellular organelle;intracellular organelle part;intracellular part;membrane-bounded organelle;nuclear chromatin;nuclear chromosome part;nuclear heterochromatin;nuclear part;nuclear periphery;nucleoplasm;nucleus;organelle;organelle part;transcriptionally active chromatin
O95340	PAPSS2	Bifunctional 3-phosphoadenosine 5-phosphosulfate synthase 2;Sulfate adenylyltransferase;Adenylyl-sulfate kinase	cell part;cytoplasmic part;cytosol;intracellular part	Purine metabolism;Selenocompound metabolism;Sulfur metabolism
O95470	SGPL1	Sphingosine-1-phosphate lyase 1	cell part;cytoplasmic part;endoplasmic reticulum;endoplasmic reticulum membrane;endoplasmic reticulum part;integral to endoplasmic reticulum membrane;integral to membrane;integral to organelle membrane;intracellular membrane-bounded organelle;intracellular organelle;intracellular organelle part;intracellular part;intrinsic to endoplasmic reticulum membrane;intrinsic to membrane;intrinsic to organ…	Sphingolipid metabolism
P04843	RPN1	Dolichyl-diphosphooligosaccharide--protein glycosyltransferase subunit 1	cell part;cytoplasmic membrane-bounded vesicle;cytoplasmic part;cytoplasmic vesicle;endoplasmic reticulum;endoplasmic reticulum membrane;endoplasmic reticulum part;integral to membrane;intracellular membrane-bounded organelle;intracellular organelle;intracellular organelle part;intracellular part;intrinsic to membrane;macromolecular complex;melanosome;membrane;membrane part;membrane-bounded organ…	N-Glycan biosynthesis;Protein processing in endoplasmic reticulum;Various types of N-glycan biosynthesis	Oligosaccharyltransferase complex (Stt3A variant);Oligosaccharyltransferase complex (Stt3B variant);Oligosaccharyltransferase OSTC-I;Oligosaccharyltransferase OSTC-II;Oligosaccharyltransferase OSTC-III
P04844	RPN2	Dolichyl-diphosphooligosaccharide--protein glycosyltransferase subunit 2	autophagic vacuole membrane;cell part;cytoplasmic part;endoplasmic reticulum;endoplasmic reticulum membrane;endoplasmic reticulum part;integral to membrane;intracellular membrane-bounded organelle;intracellular organelle;intracellular organelle part;intracellular part;intrinsic to membrane;macromolecular complex;membrane;membrane part;membrane-bounded organelle;nucleus;oligosaccharyltransferase c…	N-Glycan biosynthesis;Protein processing in endoplasmic reticulum;Various types of N-glycan biosynthesis	Oligosaccharyltransferase complex (Stt3A variant);Oligosaccharyltransferase complex (Stt3B variant);Oligosaccharyltransferase OSTC-I;Oligosaccharyltransferase OSTC-II;Oligosaccharyltransferase OSTC-III
P09874	PARP1	Poly [ADP-ribose] polymerase 1	cell part;envelope;intracellular membrane-bounded organelle;intracellular non-membrane-bounded organelle;intracellular organelle;intracellular organelle part;intracellular part;macromolecular complex;membrane;membrane-bounded organelle;non-membrane-bounded organelle;nuclear envelope;nuclear part;nucleolus;nucleoplasm;nucleoplasm part;nucleus;organelle;organelle envelope;organelle part;protein com…	Base excision repair	CAMK2-delta-MASH1 promoter-coactivator complex;CDK8-MED6-PARP1 complex;Condensin I-PARP-1-XRCC1 complex;CTCF-nucleophosmin-PARP-HIS-KPNA-LMNA-TOP complex;H2AX complex I;MASH1 promoter-coactivator complex;NCOA6-DNA-PK-Ku-PARP1 complex;Rap1 complex;RC complex during G2/M-phase of cell cycle;RC complex during S-phase of cell cycle;TLE1 corepressor complex (MASH1 promoter-corepressor complex);WRN-Ku7…
P0DN76	U2AF1;U2AF1L4	Splicing factor U2AF 35 kDa subunit;Splicing factor U2AF 26 kDa subunit	Cajal body;catalytic step 2 spliceosome;cell part;cytoplasm;intracellular organelle part;intracellular part;macromolecular complex;nuclear body;nuclear part;nuclear speck;nucleoplasm;nucleoplasm part;organelle part;ribonucleoprotein complex;spliceosomal complex	Shigellosis;Spliceosome	17S U2 snRNP;C complex spliceosome;CF IIAm complex (Cleavage factor IIAm complex);Nop56p-associated pre-rRNA complex;Spliceosome
P15880	RPS2	40S ribosomal protein S2	adherens junction;anchoring junction;cell junction;cell part;cell-substrate adherens junction;cell-substrate junction;cytoplasm;cytoplasmic part;cytosol;cytosolic small ribosomal subunit;extracellular membrane-bounded organelle;extracellular organelle;extracellular region part;extracellular vesicular exosome;focal adhesion;intracellular membrane-bounded organelle;intracellular non-membrane-bounde…	Ribosome	40S ribosomal subunit, cytoplasmic;Nop56p-associated pre-rRNA complex;Ribosome, cytoplasmic
P16615	ATP2A2	Sarcoplasmic/endoplasmic reticulum calcium ATPase 2	cell part;cytoplasmic part;endoplasmic reticulum;endoplasmic reticulum membrane;endoplasmic reticulum part;integral to membrane;integral to plasma membrane;intracellular membrane-bounded organelle;intracellular organelle;intracellular organelle part;intracellular part;intrinsic to membrane;intrinsic to plasma membrane;longitudinal sarcoplasmic reticulum;membrane;membrane part;membrane-bounded org…	Alzheimer's disease;Calcium signaling pathway;Pancreatic secretion
P18077	RPL35A	60S ribosomal protein L35a	cell part;cytoplasmic part;cytosol;cytosolic large ribosomal subunit;extracellular membrane-bounded organelle;extracellular organelle;extracellular region part;extracellular vesicular exosome;intracellular membrane-bounded organelle;intracellular non-membrane-bounded organelle;intracellular organelle;intracellular organelle part;intracellular part;large ribosomal subunit;macromolecular complex;me…	Ribosome	60S ribosomal subunit, cytoplasmic;Nop56p-associated pre-rRNA complex;Ribosome, cytoplasmic;TRBP containing complex (DICER, RPL7A, EIF6, MOV10 and subunits of the 60S ribosomal particle)
P18124	RPL7	60S ribosomal protein L7	adherens junction;anchoring junction;cell junction;cell part;cell-substrate adherens junction;cell-substrate junction;cytoplasm;cytoplasmic part;cytosol;cytosolic large ribosomal subunit;extracellular membrane-bounded organelle;extracellular organelle;extracellular region part;extracellular vesicular exosome;focal adhesion;intracellular membrane-bounded organelle;intracellular non-membrane-bounde…	Ribosome	60S ribosomal subunit, cytoplasmic;Nop56p-associated pre-rRNA complex;Ribosome, cytoplasmic;TRBP containing complex (DICER, RPL7A, EIF6, MOV10 and subunits of the 60S ribosomal particle)
P23246	SFPQ	Splicing factor, proline- and glutamine-rich	cell part;chromatin;chromosomal part;cytoplasm;intracellular membrane-bounded organelle;intracellular organelle;intracellular organelle part;intracellular part;membrane-bounded organelle;nuclear body;nuclear matrix;nuclear part;nucleoplasm;nucleoplasm part;nucleus;organelle;organelle part;paraspeckles		CDC5L complex;CF IIAm complex (Cleavage factor IIAm complex);p54(nrb)-PSF-matrin3 complex;PSF-p54(nrb) complex;snRNP-free U1A (SF-A) complex;SNW1 complex;TOP1-PSF-P54 complex
P24821	TNC	Tenascin	adherens junction;anchoring junction;basement membrane;cell junction;cell part;cell-substrate adherens junction;cell-substrate junction;extracellular matrix;extracellular matrix part;extracellular region;extracellular region part;extracellular space;focal adhesion;interstitial matrix;membrane;proteinaceous extracellular matrix	ECM-receptor interaction;Focal adhesion	ITGA9-ITGB1-TNC complex
P26358	DNMT1	DNA (cytosine-5)-methyltransferase 1	cell part;centromeric heterochromatin;chromatin;chromosomal part;heterochromatin;intracellular membrane-bounded organelle;intracellular organelle;intracellular organelle part;intracellular part;membrane-bounded organelle;nuclear part;nucleoplasm;nucleus;organelle;organelle part;replication fork	Cysteine and methionine metabolism	DAXX-DNMT1-DMAP1 complex;DNMT1-G9a complex;DNMT1-G9a-PCNA complex;DNMT1-RB1-HDAC1-E2F1 complex;pRb2/p130-multimolecular complex (DNMT1, E2F4, SuV39H1, HDAC1, RBL2);pRb2/p130-multimolecular complex (DNMT1, E2F5, SuV39H1, HDAC1, RBL2);RGS6-DNMT1-DMAP1 complex;TIP5-DNMT-HDAC1 complex
P35268	RPL22	60S ribosomal protein L22	adherens junction;anchoring junction;cell junction;cell part;cell-substrate adherens junction;cell-substrate junction;cytoplasm;cytoplasmic part;cytosol;cytosolic large ribosomal subunit;extracellular membrane-bounded organelle;extracellular organelle;extracellular region part;extracellular vesicular exosome;focal adhesion;intracellular membrane-bounded organelle;intracellular non-membrane-bounde…	Ribosome	60S ribosomal subunit, cytoplasmic;Nop56p-associated pre-rRNA complex;Ribosome, cytoplasmic
P36578	RPL4	60S ribosomal protein L4	adherens junction;anchoring junction;cell junction;cell part;cell-substrate adherens junction;cell-substrate junction;cytoplasm;cytoplasmic part;cytosol;cytosolic large ribosomal subunit;extracellular membrane-bounded organelle;extracellular organelle;extracellular region part;extracellular vesicular exosome;focal adhesion;intracellular membrane-bounded organelle;intracellular non-membrane-bounde…	Ribosome	60S ribosomal subunit, cytoplasmic;Nop56p-associated pre-rRNA complex;Ribosome, cytoplasmic;TNF-alpha/NF-kappa B signaling complex 6
P39748	FEN1	Flap endonuclease 1	cell part;cytoplasmic part;intracellular membrane-bounded organelle;intracellular non-membrane-bounded organelle;intracellular organelle;intracellular organelle part;intracellular part;membrane;membrane-bounded organelle;mitochondrion;non-membrane-bounded organelle;nuclear part;nucleolus;nucleoplasm;nucleus;organelle;organelle part;plasma membrane	Base excision repair;DNA replication;Non-homologous end-joining	FEN1-9-1-1 complex
P40429	RPL13A;RPL13a	60S ribosomal protein L13a	adherens junction;anchoring junction;cell junction;cell part;cell-substrate adherens junction;cell-substrate junction;cytoplasm;cytoplasmic part;cytosol;cytosolic large ribosomal subunit;focal adhesion;intracellular membrane-bounded organelle;intracellular non-membrane-bounded organelle;intracellular organelle;intracellular organelle part;intracellular part;large ribosomal subunit;macromolecular …	Ribosome	60S ribosomal subunit, cytoplasmic;GAIT complex;Nop56p-associated pre-rRNA complex;Ribosome, cytoplasmic
P42677	RPS27	40S ribosomal protein S27	cell part;cytoplasmic part;cytosol;cytosolic small ribosomal subunit;intracellular membrane-bounded organelle;intracellular non-membrane-bounded organelle;intracellular organelle;intracellular organelle part;intracellular part;macromolecular complex;membrane-bounded organelle;non-membrane-bounded organelle;nucleus;organelle;organelle part;ribonucleoprotein complex;ribosome;small ribosomal subunit	Ribosome	40S ribosomal subunit, cytoplasmic;Ribosome, cytoplasmic
P46779	RPL28	60S ribosomal protein L28	cell body;cell part;cell projection;cytoplasm;cytoplasmic part;cytosol;cytosolic large ribosomal subunit;dendrite;extracellular membrane-bounded organelle;extracellular organelle;extracellular region part;extracellular vesicular exosome;intracellular non-membrane-bounded organelle;intracellular organelle;intracellular organelle part;intracellular part;large ribosomal subunit;macromolecular comple…	Ribosome	60S ribosomal subunit, cytoplasmic;Nop56p-associated pre-rRNA complex;Ribosome, cytoplasmic;TRBP containing complex (DICER, RPL7A, EIF6, MOV10 and subunits of the 60S ribosomal particle)
P49207	RPL34	60S ribosomal protein L34	cell part;cytoplasm;cytoplasmic part;cytosol;cytosolic large ribosomal subunit;extracellular membrane-bounded organelle;extracellular organelle;extracellular region part;extracellular vesicular exosome;intracellular non-membrane-bounded organelle;intracellular organelle;intracellular organelle part;intracellular part;large ribosomal subunit;macromolecular complex;membrane-bounded organelle;membra…	Ribosome	60S ribosomal subunit, cytoplasmic;Ribosome, cytoplasmic;TRBP containing complex (DICER, RPL7A, EIF6, MOV10 and subunits of the 60S ribosomal particle)
P49368	CCT3	T-complex protein 1 subunit gamma	cell body;cell part;chaperonin-containing T-complex;cytoplasm;cytoplasmic part;cytoskeletal part;cytoskeleton;cytosol;cytosolic part;extracellular membrane-bounded organelle;extracellular organelle;extracellular region part;extracellular vesicular exosome;intracellular non-membrane-bounded organelle;intracellular organelle;intracellular organelle part;intracellular part;macromolecular complex;mem…		CCT micro-complex
P50914	RPL14	60S ribosomal protein L14	cell part;cytoplasm;cytoplasmic part;cytosol;cytosolic large ribosomal subunit;extracellular membrane-bounded organelle;extracellular organelle;extracellular region part;extracellular vesicular exosome;intracellular non-membrane-bounded organelle;intracellular organelle;intracellular organelle part;intracellular part;large ribosomal subunit;macromolecular complex;membrane;membrane-bounded organel…	Ribosome	60S ribosomal subunit, cytoplasmic;Nop56p-associated pre-rRNA complex;Ribosome, cytoplasmic;TRBP containing complex (DICER, RPL7A, EIF6, MOV10 and subunits of the 60S ribosomal particle)
P61254	RPL26;RPL26L1	60S ribosomal protein L26;60S ribosomal protein L26-like 1	cell part;cytoplasmic part;cytosol;cytosolic large ribosomal subunit;extracellular membrane-bounded organelle;extracellular organelle;extracellular region part;extracellular vesicular exosome;intracellular organelle part;intracellular part;large ribosomal subunit;macromolecular complex;membrane;membrane-bounded organelle;membrane-bounded vesicle;organelle;organelle part;ribonucleoprotein complex;…	Ribosome	60S ribosomal subunit, cytoplasmic;Nop56p-associated pre-rRNA complex;Ribosome, cytoplasmic
P61313	RPL15	60S ribosomal protein L15;Ribosomal protein L15	cell part;cytoplasmic part;cytosol;cytosolic large ribosomal subunit;extracellular membrane-bounded organelle;extracellular organelle;extracellular region part;extracellular vesicular exosome;intracellular membrane-bounded organelle;intracellular non-membrane-bounded organelle;intracellular organelle;intracellular organelle part;intracellular part;large ribosomal subunit;macromolecular complex;me…	Ribosome	60S ribosomal subunit, cytoplasmic;Nop56p-associated pre-rRNA complex;Ribosome, cytoplasmic;TRBP containing complex (DICER, RPL7A, EIF6, MOV10 and subunits of the 60S ribosomal particle)
P61353	RPL27	60S ribosomal protein L27	adherens junction;anchoring junction;cell junction;cell part;cell-substrate adherens junction;cell-substrate junction;cytoplasmic part;cytosol;cytosolic large ribosomal subunit;extracellular membrane-bounded organelle;extracellular organelle;extracellular region part;extracellular vesicular exosome;focal adhesion;intracellular membrane-bounded organelle;intracellular non-membrane-bounded organell…	Ribosome	60S ribosomal subunit, cytoplasmic;Nop56p-associated pre-rRNA complex;Ribosome, cytoplasmic;TRBP containing complex (DICER, RPL7A, EIF6, MOV10 and subunits of the 60S ribosomal particle)
P61513	RPL37A	60S ribosomal protein L37a	adherens junction;anchoring junction;cell junction;cell part;cell-substrate adherens junction;cell-substrate junction;cytoplasmic part;cytosol;cytosolic large ribosomal subunit;extracellular membrane-bounded organelle;extracellular organelle;extracellular region part;extracellular vesicular exosome;focal adhesion;intracellular membrane-bounded organelle;intracellular non-membrane-bounded organell…	Ribosome	60S ribosomal subunit, cytoplasmic;Nop56p-associated pre-rRNA complex;Ribosome, cytoplasmic;TRBP containing complex (DICER, RPL7A, EIF6, MOV10 and subunits of the 60S ribosomal particle)
P62241	RPS8	40S ribosomal protein S8	adherens junction;anchoring junction;cell junction;cell part;cell-substrate adherens junction;cell-substrate junction;cytoplasm;cytoplasmic part;cytosol;cytosolic small ribosomal subunit;extracellular membrane-bounded organelle;extracellular organelle;extracellular region part;extracellular vesicular exosome;focal adhesion;intracellular membrane-bounded organelle;intracellular non-membrane-bounde…	Ribosome	40S ribosomal subunit, cytoplasmic;Nop56p-associated pre-rRNA complex;Ribosome, cytoplasmic
P62249	RPS16	40S ribosomal protein S16	adherens junction;anchoring junction;cell junction;cell part;cell-substrate adherens junction;cell-substrate junction;cytoplasmic part;cytosol;cytosolic small ribosomal subunit;extracellular membrane-bounded organelle;extracellular organelle;extracellular region part;extracellular vesicular exosome;focal adhesion;intracellular non-membrane-bounded organelle;intracellular organelle;intracellular o…	Ribosome	40S ribosomal subunit, cytoplasmic;Nop56p-associated pre-rRNA complex;Ribosome, cytoplasmic
P62263	RPS14	40S ribosomal protein S14	adherens junction;anchoring junction;cell junction;cell part;cell-substrate adherens junction;cell-substrate junction;cytoplasm;cytoplasmic part;cytosol;cytosolic small ribosomal subunit;extracellular membrane-bounded organelle;extracellular organelle;extracellular region part;extracellular vesicular exosome;focal adhesion;intracellular membrane-bounded organelle;intracellular non-membrane-bounde…	Ribosome	40S ribosomal subunit, cytoplasmic;Nop56p-associated pre-rRNA complex;Ribosome, cytoplasmic
P62266	RPS23	40S ribosomal protein S23	cell part;cytoplasm;cytoplasmic part;cytosol;cytosolic small ribosomal subunit;intracellular non-membrane-bounded organelle;intracellular organelle;intracellular organelle part;intracellular part;macromolecular complex;membrane;non-membrane-bounded organelle;nuclear part;nucleolus;organelle;organelle part;ribonucleoprotein complex;ribosome;small ribosomal subunit	Ribosome	40S ribosomal subunit, cytoplasmic;Nop56p-associated pre-rRNA complex;Ribosome, cytoplasmic
P62280	RPS11	40S ribosomal protein S11	adherens junction;anchoring junction;cell junction;cell part;cell-substrate adherens junction;cell-substrate junction;cytoplasm;cytoplasmic part;cytosol;cytosolic small ribosomal subunit;extracellular membrane-bounded organelle;extracellular organelle;extracellular region part;extracellular vesicular exosome;focal adhesion;intracellular non-membrane-bounded organelle;intracellular organelle;intra…	Ribosome	40S ribosomal subunit, cytoplasmic;Nop56p-associated pre-rRNA complex;Ribosome, cytoplasmic;TNF-alpha/NF-kappa B signaling complex 6
P62701	RPS4X;RPS4Y2	40S ribosomal protein S4, X isoform;40S ribosomal protein S4, Y isoform 2	adherens junction;anchoring junction;cell junction;cell part;cell-substrate adherens junction;cell-substrate junction;cytoplasmic part;cytosol;cytosolic small ribosomal subunit;extracellular membrane-bounded organelle;extracellular organelle;extracellular region part;extracellular vesicular exosome;focal adhesion;intracellular non-membrane-bounded organelle;intracellular organelle;intracellular o…	Ribosome	40S ribosomal subunit, cytoplasmic;Ribosome, cytoplasmic
P62829	RPL23	60S ribosomal protein L23	adherens junction;anchoring junction;cell junction;cell part;cell-substrate adherens junction;cell-substrate junction;cytoplasm;cytoplasmic part;cytosol;cytosolic large ribosomal subunit;extracellular membrane-bounded organelle;extracellular organelle;extracellular region part;extracellular vesicular exosome;focal adhesion;intracellular non-membrane-bounded organelle;intracellular organelle;intra…	Ribosome	60S ribosomal subunit, cytoplasmic;Nop56p-associated pre-rRNA complex;Ribosome, cytoplasmic
P62854	RPS26;RPS26P11	40S ribosomal protein S26;Putative 40S ribosomal protein S26-like 1	cell part;cytoplasm;cytoplasmic part;cytosol;cytosolic small ribosomal subunit;extracellular membrane-bounded organelle;extracellular organelle;extracellular region part;extracellular vesicular exosome;intracellular non-membrane-bounded organelle;intracellular organelle;intracellular organelle part;intracellular part;macromolecular complex;membrane;membrane-bounded organelle;membrane-bounded vesi…	Ribosome	40S ribosomal subunit, cytoplasmic;Ribosome, cytoplasmic
P62888	RPL30	60S ribosomal protein L30	adherens junction;anchoring junction;cell junction;cell part;cell-substrate adherens junction;cell-substrate junction;cytoplasm;cytoplasmic part;cytosol;cytosolic large ribosomal subunit;extracellular membrane-bounded organelle;extracellular organelle;extracellular region part;extracellular vesicular exosome;focal adhesion;intracellular membrane-bounded organelle;intracellular non-membrane-bounde…	Ribosome	60S ribosomal subunit, cytoplasmic;Nop56p-associated pre-rRNA complex;Ribosome, cytoplasmic;TNF-alpha/Nf-kappa B signaling complex (RPL6, RPL30, RPS13, CHUK, DDX3X, NFKB2, NFKBIB, REL, IKBKG, NFKB1, MAP3K8, RELB, GLG1, NFKBIA, RELA, TNIP2, GTF2I);TNF-alpha/NF-kappa B signaling complex 6;TRBP containing complex (DICER, RPL7A, EIF6, MOV10 and subunits of the 60S ribosomal particle)
P62987	UBA52;UBC;UBB;RPS27A	Ubiquitin-60S ribosomal protein L40;Ubiquitin;60S ribosomal protein L40;Polyubiquitin-C;Ubiquitin;Polyubiquitin-B;Ubiquitin	cell body;cell part;cell projection;cytoplasm;cytoplasmic part;cytoplasmic vesicle membrane;cytoplasmic vesicle part;cytosol;cytosolic large ribosomal subunit;endocytic vesicle membrane;endosomal part;endosome membrane;extracellular membrane-bounded organelle;extracellular organelle;extracellular region part;extracellular vesicular exosome;intracellular membrane-bounded organelle;intracellular no…	Parkinson's disease;PPAR signaling pathway;Ribosome	60S ribosomal subunit, cytoplasmic;Ribosome, cytoplasmic
P63173	RPL38	60S ribosomal protein L38	adherens junction;anchoring junction;cell junction;cell part;cell-substrate adherens junction;cell-substrate junction;cytoplasmic part;cytosol;cytosolic large ribosomal subunit;eukaryotic 80S initiation complex;focal adhesion;intracellular non-membrane-bounded organelle;intracellular organelle;intracellular organelle part;intracellular part;large ribosomal subunit;macromolecular complex;non-membr…	Ribosome	60S ribosomal subunit, cytoplasmic;Ribosome, cytoplasmic
Q00839	HNRNPU	Heterogeneous nuclear ribonucleoprotein U	catalytic step 2 spliceosome;cell part;cell surface;CRD-mediated mRNA stability complex;cytoplasmic part;intracellular membrane-bounded organelle;intracellular organelle;intracellular organelle part;intracellular part;macromolecular complex;membrane;membrane-bounded organelle;nuclear part;nucleoplasm;nucleus;organelle;organelle part;protein complex;ribonucleoprotein complex;spliceosomal complex	Spliceosome	Actin-ribonucleoprotein complex (POLR2A, GTF2F1, HNRNPU);C complex spliceosome;DGCR8 multiprotein complex;Emerin complex 24;Emerin complex 52;GR-hnRNP U complex;Large Drosha complex;Nop56p-associated pre-rRNA complex;SNW1 complex
Q02978	SLC25A11	Mitochondrial 2-oxoglutarate/malate carrier protein	cell part;cytoplasmic part;integral to membrane;integral to plasma membrane;intracellular membrane-bounded organelle;intracellular organelle;intracellular organelle part;intracellular part;intrinsic to membrane;intrinsic to plasma membrane;membrane;membrane part;membrane-bounded organelle;mitochondrial inner membrane;mitochondrial membrane;mitochondrial part;mitochondrion;nucleus;organelle;organe…
Q12797	ASPH	Aspartyl/asparaginyl beta-hydroxylase	calcium channel complex;cation channel complex;cell cortex part;cell part;cortical endoplasmic reticulum;cytoplasmic part;endoplasmic reticulum;endoplasmic reticulum lumen;endoplasmic reticulum membrane;endoplasmic reticulum part;integral to endoplasmic reticulum membrane;integral to membrane;integral to organelle membrane;intracellular membrane-bounded organelle;intracellular organelle;intracell…
Q12965	MYO1E	Unconventional myosin-Ie	actin cytoskeleton;adherens junction;anchoring junction;cell junction;cell part;cell-cell junction;clathrin-coated vesicle;coated vesicle;cytoplasm;cytoplasmic membrane-bounded vesicle;cytoplasmic part;cytoplasmic vesicle;cytoskeletal part;cytoskeleton;extracellular membrane-bounded organelle;extracellular organelle;extracellular region part;extracellular vesicular exosome;intracellular membrane-…		Emerin complex 1
Q14739	LBR	Lamin-B receptor	cell part;envelope;integral to membrane;integral to nuclear inner membrane;integral to organelle membrane;intracellular organelle part;intracellular part;intrinsic to membrane;intrinsic to nuclear inner membrane;intrinsic to organelle membrane;membrane;membrane part;nuclear envelope;nuclear membrane;nuclear membrane part;nuclear part;organelle envelope;organelle membrane;organelle part
Q5JRC6	PHF6	PHD finger protein 6	cell part;chromosomal part;condensed chromosome kinetochore;intracellular membrane-bounded organelle;intracellular non-membrane-bounded organelle;intracellular organelle;intracellular organelle part;intracellular part;kinetochore;macromolecular complex;membrane-bounded organelle;non-membrane-bounded organelle;nuclear part;nucleolus;nucleoplasm;nucleus;organelle;organelle part;protein complex
Q5TEC6	HIST2H3PS2	Histone H3	cell part;chromosomal part;intracellular membrane-bounded organelle;intracellular organelle;intracellular organelle part;intracellular part;macromolecular complex;membrane-bounded organelle;nucleosome;nucleus;organelle;organelle part;protein-DNA complex
Q70UQ0	IKBIP	Inhibitor of nuclear factor kappa-B kinase-interacting protein	cell part;cytoplasmic part;endoplasmic reticulum;endoplasmic reticulum membrane;endoplasmic reticulum part;integral to membrane;intracellular membrane-bounded organelle;intracellular organelle;intracellular organelle part;intracellular part;intrinsic to membrane;membrane;membrane part;membrane-bounded organelle;organelle;organelle membrane;organelle part
Q86UE4	MTDH	Protein LYRIC	apical plasma membrane;cell junction;cell part;cell-cell junction;cytoplasm;cytoplasmic part;endoplasmic reticulum;endoplasmic reticulum membrane;endoplasmic reticulum part;integral to membrane;intercellular canaliculus;intracellular membrane-bounded organelle;intracellular non-membrane-bounded organelle;intracellular organelle;intracellular organelle part;intracellular part;intrinsic to membrane…
Q8NC51	SERBP1	Plasminogen activator inhibitor 1 RNA-binding protein	cell part;cytoplasm;cytoplasmic part;extracellular membrane-bounded organelle;extracellular organelle;extracellular region part;extracellular vesicular exosome;intracellular membrane-bounded organelle;intracellular organelle;intracellular part;membrane;membrane-bounded organelle;membrane-bounded vesicle;nucleus;organelle;perinuclear region of cytoplasm;plasma membrane;vesicle
Q8TAQ2	SMARCC2	SWI/SNF complex subunit SMARCC2	cell part;chromatin;chromatin remodeling complex;chromosomal part;intracellular organelle part;intracellular part;macromolecular complex;nBAF complex;npBAF complex;nuclear chromatin;nuclear chromosome part;nuclear part;nucleoplasm;organelle part;protein complex;SWI/SNF complex;SWI/SNF-type complex		ALL-1 supercomplex;BAF complex;BRG1-associated complex;Brg1-associated complex I;Brg1-associated complex II;Brg1-based SWI/SNF chromatin remodeling complex;BRG1-SIN3A complex;BRG1-SIN3A-HDAC containing SWI/SNF remodeling complex I;Brm-associated complex;BRM-associated complex;BRM-SIN3A complex;BRM-SIN3A-HDAC complex;EBAFa complex;EBAFb complex;Emerin complex 32;LARC complex (LCR-associated remode…
Q8TCJ2	STT3B	Dolichyl-diphosphooligosaccharide--protein glycosyltransferase subunit STT3B	cell part;cytoplasmic part;endoplasmic reticulum;endoplasmic reticulum part;integral to membrane;intracellular membrane-bounded organelle;intracellular organelle;intracellular organelle part;intracellular part;intrinsic to membrane;macromolecular complex;membrane;membrane part;membrane-bounded organelle;oligosaccharyltransferase complex;organelle;organelle part;protein complex	N-Glycan biosynthesis;Protein processing in endoplasmic reticulum;Various types of N-glycan biosynthesis	Oligosaccharyltransferase complex (Stt3B variant)
Q9BYG3	NIFK	MKI67 FHA domain-interacting nucleolar phosphoprotein	cell part;chromosome;condensed chromosome;condensed nuclear chromosome;cytoplasm;intracellular membrane-bounded organelle;intracellular non-membrane-bounded organelle;intracellular organelle;intracellular organelle part;intracellular part;membrane-bounded organelle;non-membrane-bounded organelle;nuclear chromosome;nuclear part;nucleolus;nucleoplasm;nucleus;organelle;organelle part
Q9NQW6	ANLN	Actin-binding protein anillin	actin cytoskeleton;actomyosin contractile ring;cell cortex part;cell division site part;cell part;contractile ring;cytoplasmic part;cytoskeletal part;cytoskeleton;intracellular membrane-bounded organelle;intracellular non-membrane-bounded organelle;intracellular organelle;intracellular organelle part;intracellular part;membrane-bounded organelle;non-membrane-bounded organelle;nuclear part;nucleop…
Q9P258	RCC2	Protein RCC2	cell part;chromosomal part;chromosome, centromeric core region;cytoplasmic part;cytoskeletal part;cytosol;intracellular non-membrane-bounded organelle;intracellular organelle;intracellular organelle part;intracellular part;macromolecular complex;microtubule;midbody;non-membrane-bounded organelle;nuclear part;nucleolus;organelle;organelle part;protein complex
Q9UGP8	SEC63	Translocation protein SEC63 homolog	cell part;cytoplasmic part;cytosol;endoplasmic reticulum;endoplasmic reticulum membrane;endoplasmic reticulum part;integral to membrane;intracellular membrane-bounded organelle;intracellular organelle;intracellular organelle part;intracellular part;intrinsic to membrane;membrane;membrane part;membrane-bounded organelle;organelle;organelle membrane;organelle part	Protein export;Protein processing in endoplasmic reticulum	Sec61-Sec62-Sec63 complex
Q9ULC4	MCTS1	Malignant T-cell-amplified sequence 1	cell part;cytoplasm;intracellular part;membrane;plasma membrane

## Sheet: NonRec
Uniprot_ID	id	Protein.names	GOCC.name	KEGG.name	Corum
A0A0U1RQV4	ROCK1	Rho-associated protein kinase 1	bleb;cell part;cell projection;centriole;cytoplasmic part;cytoskeletal part;cytoskeleton;cytosol;Golgi apparatus part;Golgi membrane;intracellular non-membrane-bounded organelle;intracellular organelle;intracellular organelle part;intracellular part;lamellipodium;membrane;microtubule organizing center part;non-membrane-bounded organelle;organelle;organelle membrane;organelle part;plasma membrane;…	Axon guidance;Chemokine signaling pathway;Focal adhesion;Leukocyte transendothelial migration;Pathogenic Escherichia coli infection;Regulation of actin cytoskeleton;Shigellosis;TGF-beta signaling pathway;Vascular smooth muscle contraction;Wnt signaling pathway
C9JRP1	SLC4A7	Anion exchange protein;Sodium bicarbonate cotransporter 3	apical plasma membrane;basolateral plasma membrane;cell part;cell projection;integral to membrane;integral to plasma membrane;intracellular part;intrinsic to membrane;intrinsic to plasma membrane;membrane;membrane part;microvillus;organelle part;plasma membrane;plasma membrane part;stereocilium
F5GYV5	ARL6IP4	ADP-ribosylation factor-like protein 6-interacting protein 4	cell part;intracellular membrane-bounded organelle;intracellular non-membrane-bounded organelle;intracellular organelle;intracellular organelle part;intracellular part;membrane-bounded organelle;non-membrane-bounded organelle;nuclear body;nuclear part;nuclear speck;nucleolus;nucleoplasm part;nucleus;organelle;organelle part
K7ENG2	U2AF2	Splicing factor U2AF 65 kDa subunit	cell part;intracellular membrane-bounded organelle;intracellular organelle;intracellular organelle part;intracellular part;macromolecular complex;membrane-bounded organelle;nuclear body;nuclear part;nuclear speck;nucleoplasm;nucleoplasm part;nucleus;organelle;organelle part;ribonucleoprotein complex;spliceosomal complex	Spliceosome	17S U2 snRNP;CF IIAm complex (Cleavage factor IIAm complex);Nop56p-associated pre-rRNA complex;Spliceosome
P04792	HSPB1	Heat shock protein beta-1	adherens junction;anchoring junction;cell junction;cell part;cell-substrate adherens junction;cell-substrate junction;contractile fiber part;cytoplasm;cytoplasmic part;cytoskeletal part;cytoskeleton;cytosol;extracellular membrane-bounded organelle;extracellular organelle;extracellular region part;extracellular space;extracellular vesicular exosome;focal adhesion;intracellular membrane-bounded org…	Amoebiasis;MAPK signaling pathway;VEGF signaling pathway
P29536	LMOD1	Leiomodin-1	cell part;contractile fiber part;cytoplasmic part;cytoskeletal part;cytosol;intracellular organelle part;intracellular part;membrane;organelle part;striated muscle thin filament
P39656	DDOST	Dolichyl-diphosphooligosaccharide--protein glycosyltransferase 48 kDa subunit	cell part;cytoplasmic part;endoplasmic reticulum;endoplasmic reticulum membrane;endoplasmic reticulum part;integral to membrane;intracellular membrane-bounded organelle;intracellular organelle;intracellular organelle part;intracellular part;intrinsic to membrane;macromolecular complex;membrane;membrane part;membrane-bounded organelle;oligosaccharyltransferase complex;organelle;organelle membrane;…	N-Glycan biosynthesis;Protein processing in endoplasmic reticulum;Various types of N-glycan biosynthesis	Oligosaccharyltransferase complex (Stt3A variant);Oligosaccharyltransferase complex (Stt3B variant)
P50402	EMD	Emerin	cell part;cytoplasmic part;cytoskeletal part;endoplasmic reticulum;envelope;integral to membrane;intracellular membrane-bounded organelle;intracellular organelle;intracellular organelle part;intracellular part;intrinsic to membrane;macromolecular complex;membrane;membrane part;membrane-bounded organelle;microtubule;nuclear envelope;nuclear inner membrane;nuclear membrane;nuclear outer membrane;nu…	Arrhythmogenic right ventricular cardiomyopathy (ARVC);Dilated cardiomyopathy;Hypertrophic cardiomyopathy (HCM)	Emerin architectural complex;Emerin complex 1;Emerin complex 24;Emerin complex 25;Emerin complex 32;Emerin complex 52;Emerin regulatory complex;Emerin-actin-NMI complex;Emerin-actin-NMI-(alphaII)spectrin complex
P50416	CPT1A	Carnitine O-palmitoyltransferase 1, liver isoform	cell part;cytoplasmic part;integral to membrane;integral to mitochondrial membrane;integral to mitochondrial outer membrane;integral to organelle membrane;intracellular membrane-bounded organelle;intracellular organelle;intracellular organelle part;intracellular part;intrinsic to membrane;intrinsic to mitochondrial outer membrane;intrinsic to organelle membrane;membrane;membrane part;membrane-bou…	Adipocytokine signaling pathway;Fatty acid metabolism;PPAR signaling pathway
Q14498	RBM39	RNA-binding protein 39	cell part;cytoplasmic part;cytoskeletal part;cytoskeleton;intracellular membrane-bounded organelle;intracellular non-membrane-bounded organelle;intracellular organelle;intracellular organelle part;intracellular part;membrane-bounded organelle;microtubule cytoskeleton;microtubule organizing center;non-membrane-bounded organelle;nuclear body;nuclear part;nuclear speck;nucleoplasm;nucleoplasm part;n…		Spliceosome
Q6ZUT6	C15orf52	Uncharacterized protein C15orf52
Q8N556	AFAP1	Actin filament-associated protein 1	actin cytoskeleton;adherens junction;anchoring junction;cell junction;cell part;cell-substrate adherens junction;cell-substrate junction;cytoplasm;cytoskeleton;focal adhesion;intracellular non-membrane-bounded organelle;intracellular organelle;intracellular part;non-membrane-bounded organelle;organelle
Q96PU4	UHRF2	E3 ubiquitin-protein ligase UHRF2	cell part;chromatin;chromosomal part;heterochromatin;intracellular membrane-bounded organelle;intracellular organelle;intracellular organelle part;intracellular part;membrane-bounded organelle;nuclear chromatin;nuclear chromosome part;nuclear heterochromatin;nuclear part;nucleoplasm;nucleus;organelle;organelle part
Q9H4L4	SENP3;SENP3-EIF4A1	Sentrin-specific protease 3	cell part;cytoplasm;histone methyltransferase complex;intracellular membrane-bounded organelle;intracellular non-membrane-bounded organelle;intracellular organelle;intracellular organelle part;intracellular part;macromolecular complex;membrane-bounded organelle;methyltransferase complex;MLL1 complex;non-membrane-bounded organelle;nuclear part;nucleolus;nucleoplasm part;nucleus;organelle;organelle…		MLL1-WDR5 complex
Q9Y450	HBS1L	HBS1-like protein	cell part;extracellular membrane-bounded organelle;extracellular organelle;extracellular region part;extracellular vesicular exosome;membrane;membrane-bounded organelle;membrane-bounded vesicle;organelle;vesicle	mRNA surveillance pathway

## Sheet: all protein (no background)
Uniprot_ID	Gene	Log.P.Value.1_NES.vs.2_NT	Log.P.Value.1_NES.vs.3_REC	Log.P.Value.1_NES.vs.4_Hypo	Log.P.Value.2_NT.vs.3_REC	Log.P.Value.2_NT.vs.4_Hypo	Log.P.Value.3_REC.vs.4_Hypo	logFC.1_NES.vs.2_NT	logFC.1_NES.vs.3_REC	logFC.1_NES.vs.4_Hypo	logFC.2_NT.vs.3_REC	logFC.2_NT.vs.4_Hypo	logFC.3_REC.vs.4_Hypo
A0A024RAC6	TCEB3	#N/A	#N/A	#N/A	1.29693	5.49205	1.5851	#N/A	#N/A	#N/A	-0.0762266	-0.203588	-0.127362
A0A087WTA5	EIF2B4	9.73243	13.8392	26.7069	5.37959	22.4113	19.3054	0.366604	0.527036	1.58073	0.160432	1.21412	1.05369
A0A087WUT6	EIF5B	10.2833	25.8609	15.2253	15.8758	5.13577	5.46298	0.415598	0.920563	0.661863	0.504965	0.246265	-0.2587
A0A087WVP4	SMTN	#N/A	#N/A	#N/A	11.3194	4.33756	4.86286	#N/A	#N/A	#N/A	-0.535799	-0.302928	0.232871
A0A087WXM6	RPL17;RPL17-C18orf32	32.6929	20.1516	43.0114	13.1128	27.8449	33.1133	0.973569	0.659072	1.84271	-0.314498	0.869144	1.18364
A0A087WY03	SREK1	11.2379	26.9	27.0285	18.3915	18.9681	0.438938	0.329638	0.870567	0.897853	0.54093	0.568215	0.0272853
A0A087X1B2	USP39	25.4405	18.5177	7.93394	1.95493	18.9516	10.5908	0.935386	0.841635	0.392904	-0.0937513	-0.542482	-0.448731
A0A0A0MQV6	FGF2	#N/A	7.65252	24.4432	#N/A	#N/A	28.1712	#N/A	0.48671	1.96747	#N/A	#N/A	1.48076
A0A0A0MRM9	NOLC1	4.84809	27.6318	14.3027	25.3006	10.7832	6.34136	0.245174	1.04409	0.74023	0.798914	0.495056	-0.303858
A0A0A6YYC7	ZFP91-CNTF;ZFP91	#N/A	#N/A	#N/A	24.2726	19.133	5.85059	#N/A	#N/A	#N/A	-1.15164	-0.870049	0.28159
A0A0A6YYI3	PPAN-P2RY11;PPAN	50.6686	24.8044	44.7107	22.2339	5.16453	22.8372	1.60026	0.890436	1.79665	-0.709824	0.196394	0.906218
A0A0C4DGB1	DIMT1	12.5198	12.4178	23.4821	1.20806	22.1959	20.3087	0.470097	0.513145	1.46904	0.0430482	0.998943	0.955894
A0A0U1RQV4	ROCK1	#N/A	#N/A	#N/A	#N/A	#N/A	0.684816	#N/A	#N/A	#N/A	#N/A	#N/A	0.0529232
A0A0U1RR22	PACSIN2	#N/A	#N/A	#N/A	6.6218	#N/A	#N/A	#N/A	#N/A	#N/A	0.217266	#N/A	#N/A
A0A1B0GTL5	RAB11FIP5	#N/A	#N/A	#N/A	13.2724	1.43669	11.943	#N/A	#N/A	#N/A	0.694092	-0.15951	-0.853602
A0A1B0GTU4	PXN	17.9134	25.4993	12.8472	6.6471	23.0508	27.7865	0.577557	0.79414	-0.79827	0.216584	-1.37583	-1.59241
A0A1B0GW05	DPY19L1	#N/A	#N/A	#N/A	0.221042	19.0643	10.5854	#N/A	#N/A	#N/A	0.016592	1.05979	1.0432
A0A2R8Y4Z0	CDK13	35.9969	0.358697	14.5494	24.9817	17.4885	10.5628	1.09901	-0.0269241	0.517906	-1.12593	-0.581104	0.54483
A0A3B3ITT5	RPL29	56.1972	16.4079	43.9398	22.6676	1.39245	21.106	1.93935	0.842673	2.01352	-1.09668	0.0741755	1.17085
A0A3F2YNY6	PRPF40A	1.02221	3.51786	18.1819	11.5219	34.7416	27.5175	-0.0731214	0.226888	1.38621	0.300009	1.45933	1.15932
A0A494C001	RBM15	7.96148	5.44468	20.305	20.7413	15.2104	26.9703	0.280368	-0.218573	0.895342	-0.498941	0.614974	1.11392
A0A499FIX8	ESYT2	#N/A	#N/A	#N/A	16.7516	0.525593	8.33059	#N/A	#N/A	#N/A	0.627653	0.0590353	-0.568618
A0A5H1ZRS1	PCM1	#N/A	#N/A	#N/A	5.15786	5.00708	2.06827	#N/A	#N/A	#N/A	-0.206939	-0.371885	-0.164946
A2A2V2	RBM34	15.1116	15.6628	23.2862	2.74256	8.70381	3.13519	0.46302	0.608731	0.792485	0.145711	0.329465	0.183754
A8CG34	POM121C;POM121B;POM121	#N/A	#N/A	#N/A	4.87714	5.79125	3.15461	#N/A	#N/A	#N/A	0.264382	0.460255	0.195873
A9Z1X7	SRRM1	1.22012	27.8928	21.7032	25.0286	18.1581	1.34028	-0.0645161	1.04012	1.16005	1.10464	1.22456	0.119926
B4DDF4	CNN2	35.0673	33.1528	7.01759	0.00254578	29.6088	30.3425	1.1505	1.15061	-0.464944	0.000110627	-1.61544	-1.61555
B4DXZ6	FXR1	#N/A	#N/A	#N/A	4.4291	5.0803	11.0063	#N/A	#N/A	#N/A	-0.307808	0.328479	0.636287
B5MCB4	MECP2	#N/A	#N/A	#N/A	0.634305	13.1863	10.2377	#N/A	#N/A	#N/A	-0.0414101	0.639138	0.680548
B5MCF9	PES1	16.3438	2.00901	25.5138	23.9677	17.2027	27.5642	0.444515	-0.0858351	1.32039	-0.53035	0.875879	1.40623
B7Z6D5	DDX27	37.871	15.4953	26.62	32.4787	1.83869	17.9441	1.31026	0.57871	1.43375	-0.731555	0.123486	0.85504
C9JAW5	HIGD1A	5.85059	19.3703	17.8572	12.3222	11.4574	3.77754	0.472591	0.966718	1.14049	0.494127	0.667899	0.173773
C9JJ19	MRPS34	4.94291	21.2792	42.6574	10.781	30.5138	26.9665	0.242265	0.717803	1.79236	0.475539	1.5501	1.07456
C9JRP1	SLC4A7	#N/A	#N/A	#N/A	#N/A	#N/A	7.14667	#N/A	#N/A	#N/A	#N/A	#N/A	0.322454
C9JXB8	RPL24	36.7355	30.0178	35.2385	2.66269	7.62881	9.24913	1.00572	0.909519	1.28106	-0.0962041	0.275334	0.371538
D3YTB1	RPL32	44.8518	22.9956	33.635	12.6949	7.69306	4.59328	1.47178	0.944049	1.19771	-0.527736	-0.274079	0.253657
D6R9P3	HNRNPAB	38.0555	6.11073	24.127	26.3119	41.369	24.9613	-1.5205	-0.254275	0.872002	1.26623	2.3925	1.12628
E7EPN9	PRRC2C	49.8475	17.3077	40.0883	22.2066	2.23376	17.8804	1.83124	0.832985	1.72252	-0.998252	-0.108718	0.889533
E7ETK0	RPS24	24.3449	11.3911	18.7323	13.4691	0.0360311	8.01488	0.7006	0.385276	0.698711	-0.315324	-0.00188828	0.313435
E7EVA0	MAP4	34.2299	32.6577	38.7811	0.323056	19.8991	18.7971	0.953962	0.967067	1.74366	0.0131048	0.789693	0.776588
E7EX44	CALD1	#N/A	#N/A	#N/A	11.1887	#N/A	#N/A	#N/A	#N/A	#N/A	0.401269	#N/A	#N/A
E9PDF6	MYO1B	9.95488	4.29871	21.452	6.51587	14.6016	22.7271	0.59153	0.298609	1.2809	-0.29292	0.689371	0.982292
E9PGF5	TNS1	#N/A	#N/A	#N/A	8.68068	#N/A	#N/A	#N/A	#N/A	#N/A	-0.357582	#N/A	#N/A
E9PGZ1	CALD1_1	24.8047	38.1168	8.19696	20.1084	3.1175	13.2059	0.789387	1.32424	0.548738	0.534856	-0.240648	-0.775504
E9PJK1	CD81	2.21875	12.1643	27.8368	12.6175	37.8195	30.0184	0.200885	0.785137	2.09487	0.584252	1.89398	1.30973
E9PRG8	C11orf98	27.1358	5.46219	11.875	13.8132	5.5382	4.67317	1.82371	0.482072	1.21916	-1.34164	-0.604553	0.737087
F2Z2E2	IQGAP3	#N/A	#N/A	#N/A	3.79492	3.82471	0.374922	#N/A	#N/A	#N/A	-0.207898	-0.257523	-0.0496254
F5GYV5	ARL6IP4	6.47318	27.157	9.84023	41.6689	19.7901	11.0296	-0.248716	0.840118	0.425887	1.08883	0.674603	-0.414231
F5H6E2	MYO1C	14.5837	8.72045	21.0315	7.36925	12.7906	16.8222	0.584681	0.405419	1.13302	-0.179262	0.548337	0.727599
F5H6Z0	CDK17	#N/A	#N/A	#N/A	0.729625	13.6402	9.52302	#N/A	#N/A	#N/A	0.0377744	0.425997	0.388223
F5H7F6	MGST1	5.51554	18.4355	29.4683	13.9468	26.783	12.6681	0.210335	0.712247	1.3812	0.501912	1.17087	0.668955
F5H7V8	MRPL21	13.8275	6.04653	22.7235	7.85842	15.9324	20.8745	0.476103	0.260394	0.949345	-0.21571	0.473242	0.688951
F8WC54	ADAM9	#N/A	#N/A	#N/A	7.14163	7.5589	1.65827	#N/A	#N/A	#N/A	-0.245321	-0.343959	-0.0986389
G3V1C3	API5	18.9191	4.92501	13.6945	34.7626	1.94576	24.4033	0.631819	-0.211847	0.547673	-0.843665	-0.0841459	0.75952
H0Y993	DEK	34.1598	35.3684	30.1713	4.75337	7.83274	3.8146	1.02981	1.17795	1.39602	0.148147	0.366217	0.21807
H0YE57	DHCR7	#N/A	#N/A	#N/A	0.57282	19.4646	20.5145	#N/A	#N/A	#N/A	-0.0387786	0.972917	1.0117
H3BLV9	SRPK1	#N/A	#N/A	#N/A	0.523758	5.80933	5.49477	#N/A	#N/A	#N/A	0.0298665	0.532937	0.503071
H3BNC9	RPS17	23.2052	10.0439	37.0908	3.53439	25.2909	20.7938	0.702627	0.507444	1.49651	-0.195183	0.793886	0.989069
H3BPZ1	HACD3	9.7588	0.844246	20.065	15.2913	14.5146	23.126	0.456439	0.0585467	1.2507	-0.397892	0.794259	1.19215
H7BYN4	KIF23	#N/A	#N/A	#N/A	0.0897957	22.0944	22.652	#N/A	#N/A	#N/A	-0.00403595	0.841287	0.845323
H7C2Q8	EBNA1BP2	52.2738	14.441	43.0299	19.2618	4.22651	21.1041	2.1486	0.9461	2.38357	-1.2025	0.234977	1.43747
I3L3B4	VKORC1	25.2132	22.7898	27.5905	7.29569	15.6299	6.47005	0.831247	1.26586	1.96686	0.434616	1.13561	0.700997
I3L3X5	TMEM256-PLSCR3;PLSCR3	#N/A	#N/A	#N/A	#N/A	#N/A	#N/A	#N/A	#N/A	#N/A	#N/A	#N/A	#N/A
J3KPP4	LUC7L3	18.4396	15.69	14.0303	5.78705	2.42283	1.62225	0.991421	0.788727	0.871068	-0.202695	-0.120353	0.0823415
J3KSW8	MPRIP	#N/A	#N/A	#N/A	1.59692	3.68126	4.5528	#N/A	#N/A	#N/A	0.062727	-0.175785	-0.238512
J3QQ67	RPL18	36.7472	10.2173	27.3749	14.5524	1.301	10.3544	1.02102	0.459681	0.961664	-0.561338	-0.0593554	0.501983
J3QR09	RPL19	47.0236	14.4444	37.2807	30.5274	3.43487	23.1012	1.77723	0.674362	1.64082	-1.10286	-0.136401	0.966462
K4DIA7	CD151	24.3181	6.05369	2.01842	19.7691	31.1623	10.3874	0.766354	0.272106	-0.115437	-0.494247	-0.88179	-0.387543
K7EK07	H3F3B;H3F3A;HIST3H3;H3F3C	32.455	11.12	41.2375	27.2322	29.1877	38.9879	1.17097	0.487233	2.61789	-0.683732	1.44692	2.13066
K7ENG2	U2AF2	18.8101	15.414	22.4336	35.6795	38.5344	7.69772	-0.725051	0.561304	0.866502	1.28636	1.59155	0.305198
M0R117	RPL18A	20.6696	19.0323	34.5333	0.15884	27.628	27.114	0.919324	0.926207	2.31774	0.00688299	1.39842	1.39153
M0R3F1	HNRNPUL1	0.517086	0.0280628	19.0333	0.498335	21.6012	19.6069	0.0393677	0.00293096	1.43412	-0.0364367	1.39475	1.43119
O00178	GTPBP1	16.2749	16.6655	19.4109	2.8184	12.7898	9.36058	0.563759	0.661037	1.14463	0.0972786	0.580875	0.483597
O00622	CYR61	31.612	46.5356	45.4208	1.37334	5.45752	7.14014	2.46629	2.63204	3.03377	0.165748	0.567476	0.401728
O14647	CHD2	#N/A	#N/A	#N/A	1.90746	6.89585	8.77487	#N/A	#N/A	#N/A	-0.151474	0.698228	0.849702
O14964	HGS	19.7316	10.2503	16.9038	11.0523	30.9244	27.1204	0.670626	0.396727	-1.21299	-0.273899	-1.88362	-1.60972
O15042	U2SURP	14.1652	18.9894	5.13125	5.33617	22.0257	24.7206	0.430326	0.576099	-0.232928	0.145773	-0.663254	-0.809027
O15056	SYNJ2	#N/A	#N/A	#N/A	#N/A	6.09964	#N/A	#N/A	#N/A	#N/A	#N/A	0.592324	#N/A
O15213	WDR46	17.3129	22.3039	30.6852	8.88946	24.1457	17.0253	0.715514	0.958283	1.67254	0.242769	0.95703	0.714261
O15371	EIF3D	12.9195	11.1661	25.4446	0.689298	17.1361	16.9296	0.468815	0.438057	1.11799	-0.0307585	0.649172	0.67993
O15400	STX7	#N/A	#N/A	#N/A	#N/A	#N/A	#N/A	#N/A	#N/A	#N/A	#N/A	#N/A	#N/A
O15427	SLC16A3	31.9396	30.793	32.3746	1.78701	6.9173	3.62626	0.936414	1.00057	1.15895	0.06416	0.222539	0.158379
O43143	DHX15	6.10456	1.74897	19.9271	4.1509	16.7007	18.5381	0.213564	0.0847174	0.896775	-0.128846	0.683211	0.812057
O43395	PRPF3	25.46	20.3705	3.40635	0.560045	15.9336	11.7049	0.817129	0.7858	0.201174	-0.0313288	-0.615955	-0.584626
O43491	EPB41L2	40.2902	28.0018	36.045	5.21532	5.14485	8.88804	1.14236	0.951612	1.33816	-0.190744	0.195799	0.386543
O43583	DENR	22.472	17.7585	44.0576	3.09417	35.9115	38.4633	1.04045	0.879316	2.42712	-0.161133	1.38667	1.5478
O43592	XPOT	#N/A	#N/A	#N/A	10.2445	3.10656	12.5283	#N/A	#N/A	#N/A	1.18294	-0.197081	-1.38002
O43615	TIMM44	19.064	19.9462	26.6883	0.222419	5.55019	6.2169	0.66722	0.654035	0.914651	-0.0131855	0.24743	0.260616
O60264	SMARCA5	26.9633	11.0962	17.1028	11.121	0.628241	6.99872	0.818806	0.447392	0.865697	-0.371414	0.0468909	0.418305
O60292	SIPA1L3	#N/A	#N/A	#N/A	#N/A	#N/A	#N/A	#N/A	#N/A	#N/A	#N/A	#N/A	#N/A
O60524	NEMF	18.2453	2.80158	19.9782	11.645	5.81955	14.3276	0.520574	0.144385	0.733854	-0.376189	0.21328	0.589469
O60832	DKC1	36.8844	37.7273	38.77	4.69822	10.5846	4.02384	1.07909	1.23035	1.40453	0.15126	0.325432	0.174172
O75131	CPNE3	1.99239	25.4529	12.2605	26.8887	11.2635	7.36131	0.0837905	0.795268	0.474755	0.711478	0.390965	-0.320513
O75367	H2AFY	23.0903	11.3837	36.0918	4.75886	22.93	22.9302	0.607388	0.42234	1.33571	-0.185048	0.728326	0.913374
O75369	FLNB	19.7867	30.9859	15.944	14.8638	30.7538	37.4014	0.560716	0.907987	-0.696983	0.347271	-1.2577	-1.60497
O75475	PSIP1	41.9898	23.7641	48.8086	8.33325	24.2732	26.1268	1.4182	1.03618	2.22726	-0.382022	0.809057	1.19108
O75691	UTP20	28.9165	12.6642	5.83263	13.7249	14.3282	3.07409	1.52006	0.873128	0.567985	-0.646935	-0.952079	-0.305143
O76094	SRP72	6.55112	6.71785	24.0168	1.3977	19.0183	15.7637	0.234201	0.318873	1.30029	0.0846717	1.06609	0.981422
O94776	MTA2	24.8927	9.96706	24.0874	15.1435	7.27826	16.8479	0.897708	0.461594	1.24825	-0.436115	0.35054	0.786655
O94915	FRYL	#N/A	#N/A	#N/A	4.60884	#N/A	#N/A	#N/A	#N/A	#N/A	0.302923	#N/A	#N/A
O95340	PAPSS2	2.79051	1.86532	32.059	5.7867	39.7086	27.195	-0.111415	0.0982443	1.10183	0.209659	1.21324	1.00359
O95470	SGPL1	14.1645	14.5686	26.8885	1.7208	28.7862	24.1963	0.779535	0.851392	1.67432	0.0718568	0.894781	0.822924
O95478	NSA2	#N/A	#N/A	#N/A	#N/A	28.6986	#N/A	#N/A	#N/A	#N/A	#N/A	1.08662	#N/A
O96013	PAK4	31.6223	25.1932	36.6308	4.34617	15.1909	17.3343	0.91251	0.78267	1.34872	-0.12984	0.436207	0.566046
O96028	WHSC1	26.173	14.5027	16.4239	4.72978	7.40146	0.332988	1.22385	0.947633	0.919548	-0.276214	-0.304299	-0.0280851
P00558	PGK1	28.9105	28.1588	20.5583	3.47722	1.12329	3.48054	0.784276	0.901586	0.732761	0.11731	-0.0515149	-0.168825
P02795	MT2A;MT1X;MT1G	13.3606	21.2832	0.225778	7.09124	12.1683	20.1077	0.735363	1.04806	-0.0255458	0.3127	-0.760909	-1.07361
P04792	HSPB1	9.12438	40.1586	35.7573	41.4312	33.1364	3.86097	0.304342	1.28238	1.46421	0.978035	1.15987	0.181832
P04843	RPN1	7.28281	8.46516	21.1828	1.25034	27.4505	27.8363	-0.225547	-0.265882	0.935945	-0.0403353	1.16149	1.20183
P04844	RPN2	15.1128	11.5312	18.1876	2.3297	29.6046	27.6274	-0.43088	-0.357245	0.795338	0.0736345	1.22622	1.15258
P05121	SERPINE1	#N/A	#N/A	#N/A	6.71665	12.0014	6.91732	#N/A	#N/A	#N/A	0.207143	0.841564	0.634421
P06748	NPM1	23.6141	22.5028	3.57639	0.417151	25.3561	24.094	0.676888	0.693874	-0.184388	0.0169862	-0.861277	-0.878263
P08240	SRPR	21.1259	8.41386	15.6471	9.09807	2.262	5.17567	0.934904	0.539377	0.836386	-0.395527	-0.0985184	0.297009
P08621	SNRNP70	42.5216	9.77493	25.0598	13.1051	9.76946	5.10711	1.17643	0.526508	0.861835	-0.649927	-0.314599	0.335328
P08648	ITGA5	8.34373	22.0806	5.4397	25.0837	0.711705	9.48896	0.414926	1.01976	0.474242	0.604832	0.059316	-0.545516
P08670	VIM	0.651845	8.7631	19.8748	11.0989	21.6025	9.63558	-0.0292676	0.337229	0.824671	0.366497	0.853939	0.487442
P09874	PARP1	7.00121	11.836	22.1536	3.85291	31.3511	35.4998	-0.292788	-0.428499	0.948823	-0.135712	1.24161	1.37732
P0DN76	U2AF1;U2AF1L4	28.8516	13.453	18.9818	10.7799	46.735	32.6017	-0.880859	-0.530305	0.696618	0.350555	1.57748	1.22692
P11166	SLC2A1	22.1189	18.9226	19.6217	4.36613	0.0340997	3.0896	1.13995	0.996194	1.13796	-0.143754	-0.001983	0.141771
P11387	TOP1	11.3808	14.4482	20.2868	3.7516	13.7	10.2881	0.343827	0.455193	0.983739	0.111366	0.639912	0.528546
P11388	TOP2A	49.3147	45.8121	44.1352	0.849588	13.4851	11.5203	1.64105	1.67803	2.21431	0.0369784	0.573254	0.536276
P12235	SLC25A4	#N/A	#N/A	#N/A	1.92322	2.03675	3.60455	#N/A	#N/A	#N/A	0.0927391	-0.128998	-0.221738
P14868	DARS	1.16966	4.15702	19.9119	6.66433	20.6506	14.6391	-0.0635773	0.181597	0.733761	0.245175	0.797339	0.552164
P15880	RPS2	16.9023	7.18152	31.3139	12.317	22.7366	30.6583	0.633242	0.311223	1.59192	-0.322018	0.958675	1.28069
P16615	ATP2A2	6.67025	0.449905	26.6504	8.95211	22.7935	27.7771	0.238649	-0.0243066	1.15205	-0.262955	0.913405	1.17636
P18077	RPL35A	0.287761	0.995839	28.1753	1.79457	32.6416	28.5072	-0.0166168	0.060798	1.29805	0.0774148	1.31467	1.23725
P18085	ARF4	8.62463	26.4197	15.617	21.936	8.28772	6.19325	0.277601	0.79164	0.545186	0.514039	0.267585	-0.246454
P18124	RPL7	16.4606	8.73885	30.2997	8.24431	24.8187	27.9695	0.669569	0.438065	1.75246	-0.231504	1.08289	1.3144
P18583	SON	1.78683	13.7255	20.4703	15.3352	21.2075	9.08363	0.0873515	0.498959	0.931115	0.411607	0.843763	0.432156
P19367	HK1	14.6465	24.2828	23.3741	2.58259	10.1282	9.2318	0.598082	0.7295	1.25207	0.131418	0.653989	0.52257
P20042	EIF2S2	5.64307	5.53641	23.0666	1.73226	8.34592	17.5685	0.354029	0.218456	0.907355	-0.135572	0.553326	0.688899
P20073	ANXA7	7.30596	20.6935	21.035	13.7064	25.2129	32.1839	0.298763	0.724034	-1.41185	0.425271	-1.71062	-2.13589
P21291	CSRP1	16.0364	29.3917	1.21687	16.7728	8.99717	19.7917	0.625106	1.08524	0.106827	0.460138	-0.518279	-0.978416
P21333	FLNA	28.2191	37.6268	2.47735	12.9775	22.5436	32.0092	0.886851	1.25027	0.132459	0.363417	-0.754392	-1.11781
P22087	FBL	22.769	10.2202	21.7736	12.8893	5.97094	14.4775	0.682926	0.346333	0.990987	-0.336593	0.308061	0.644654
P23246	SFPQ	33.4921	41.2088	18.0699	15.4472	43.8681	49.3296	-1.06553	-1.56129	0.701902	-0.495763	1.76743	2.26319
P24821	TNC	12.0373	10.2729	28.987	2.06211	36.7066	32.6634	-0.34596	-0.458049	1.32299	-0.112089	1.66895	1.78104
P26006	ITGA3	17.297	4.0727	11.6239	14.4263	36.9604	21.2159	0.711771	0.257177	-0.628892	-0.454594	-1.34066	-0.88607
P26358	DNMT1	37.5884	23.1154	41.3257	19.113	32.8604	41.5308	2.64164	1.72424	5.52086	-0.917404	2.87922	3.79662
P26373	RPL13	54.8126	28.4511	49.3008	23.2244	2.02374	23.73	2.00687	1.07569	2.11784	-0.931189	0.110969	1.04216
P29317	EPHA2	17.2554	7.04159	0.547807	5.80421	15.9226	6.97105	0.518991	0.308266	-0.036761	-0.210725	-0.555752	-0.345027
P29536	LMOD1	#N/A	#N/A	#N/A	#N/A	#N/A	6.73917	#N/A	#N/A	#N/A	#N/A	#N/A	0.613612
P30050	RPL12	17.9481	2.28754	42.1918	8.72045	52.1913	38.343	0.544168	0.145741	-1.86745	-0.398427	-2.41162	-2.01319
P32969	RPL9	20.6885	15.7174	24.9754	3.78722	12.7917	15.1408	0.607128	0.497864	1.18515	-0.109264	0.578022	0.687286
P33724	CAV1-A2E	#N/A	#N/A	#N/A	1.1978	14.0323	15.3005	#N/A	#N/A	#N/A	0.0601473	-0.903268	-0.963415
P35251	RFC1	22.2902	7.48101	17.7398	13.5643	0.690091	9.73329	0.698366	0.320385	0.734634	-0.377981	0.0362676	0.414249
P35268	RPL22	6.5814	10.3274	29.7962	3.95455	27.917	23.8612	0.239423	0.351288	1.21027	0.111865	0.970846	0.858981
P35579	MYH9	14.619	23.0482	1.89888	10.3231	16.4093	22.3777	0.408438	0.653511	-0.0987879	0.245073	-0.507226	-0.752299
P36578	RPL4	17.2184	12.2829	31.483	4.50641	25.3148	27.5145	0.69792	0.565984	1.98003	-0.131936	1.28211	1.41404
P39023	RPL3	18.5134	8.31575	27.7103	13.0208	18.5121	24.7947	0.639228	0.3479	1.42157	-0.291328	0.782345	1.07367
P39656	DDOST	4.30762	28.578	29.4738	28.6301	31.2197	0.819761	0.186157	1.29911	1.23721	1.11295	1.05105	-0.0619036
P39748	FEN1	2.08116	18.0631	21.5834	14.3163	23.5362	34.647	-0.0959644	-0.561684	0.747076	-0.465719	0.84304	1.30876
P40429	RPL13A;RPL13a	21.4336	10.3571	33.1581	12.1214	24.9499	30.013	0.811713	0.4855	1.75853	-0.326213	0.946821	1.27303
P42677	RPS27	10.1775	8.4203	24.813	1.70724	20.9162	22.9371	0.475805	0.409968	1.24685	-0.0658372	0.771049	0.836887
P42766	RPL35	16.887	1.1118	16.9546	15.744	4.16063	16.7369	0.590199	-0.0836722	0.805226	-0.673871	0.215027	0.888898
P46013	MKI67	63.6335	50.6027	52.9084	19.3403	0.238075	13.9324	2.49802	1.98271	2.51093	-0.515315	0.0129083	0.528223
P46063	RECQL	13.5526	20.9987	26.1819	7.64462	17.155	10.3993	0.419433	0.622223	1.04641	0.20279	0.626977	0.424187
P46776	RPL27A	40.0865	27.0964	40.4973	14.1414	13.4859	23.0991	1.23988	0.86666	1.71896	-0.373223	0.479081	0.852304
P46777	RPL5	18.0483	1.91577	19.2325	17.695	5.67253	17.6227	0.531808	0.0878073	0.793749	-0.444001	0.261941	0.705942
P46778	RPL21	26.6776	12.7789	30.1698	16.0799	14.8542	23.1701	0.79092	0.439443	1.37364	-0.351477	0.58272	0.934198
P46779	RPL28	14.9531	4.28675	29.0747	14.795	23.7111	30.55	0.574467	0.224269	1.45939	-0.350199	0.884925	1.23512
P46781	RPS9	29.3069	10.5529	29.7945	21.6689	11.3303	24.6576	1.03666	0.426121	1.64196	-0.610542	0.605299	1.21584
P46821	MAP1B	30.7687	46.9996	30.9369	24.5305	12.084	0.228704	0.869163	1.46002	1.4427	0.590853	0.57354	-0.0173124
P46939	UTRN	#N/A	#N/A	#N/A	2.70439	#N/A	#N/A	#N/A	#N/A	#N/A	-0.153711	#N/A	#N/A
P46977	STT3A	11.0719	2.38298	21.7505	6.71128	14.935	18.6045	0.3637	0.125003	1.02593	-0.238697	0.662229	0.900926
P49207	RPL34	16.1109	5.39079	30.9294	12.4101	23.2496	30.0544	0.559319	0.241755	1.39261	-0.317564	0.833291	1.15086
P49368	CCT3	10.8957	1.09723	23.9569	16.0742	36.7161	24.8564	-0.388905	0.0560958	0.84236	0.445001	1.23126	0.786264
P49790	NUP153	20.2873	27.6378	14.3807	15.7477	1.85835	13.4775	0.883148	1.37011	0.790009	0.486966	-0.0931396	-0.580106
P50402	EMD	#N/A	#N/A	#N/A	#N/A	#N/A	3.69095	#N/A	#N/A	#N/A	#N/A	#N/A	-0.194361
P50416	CPT1A	#N/A	18.2656	17.8349	#N/A	#N/A	4.58673	#N/A	1.45524	1.88939	#N/A	#N/A	0.434145
P50914	RPL14	8.95877	0.471591	27.0118	14.6772	24.2789	31.1075	0.392804	0.031875	1.53045	-0.360929	1.13764	1.49857
P50995	ANXA11	15.9942	22.2061	37.2898	8.57108	47.8653	50.6634	0.535639	0.784067	-1.92743	0.248428	-2.46306	-2.71149
P51116	FXR2	#N/A	#N/A	#N/A	16.6941	8.26421	21.9315	#N/A	#N/A	#N/A	-0.566303	0.329666	0.895969
P51608	MECP2_1	28.0753	7.76439	27.0256	18.4436	4.08377	20.7032	1.44719	0.523836	1.7402	-0.923358	0.293002	1.21636
P51636	CAV2	31.7962	34.256	15.1535	9.6989	14.9982	21.9197	1.61727	1.86308	1.05986	0.24581	-0.557409	-0.803219
P53396	ACLY	0.0327606	20.7937	7.97104	23.1556	8.36225	23.3804	0.00182152	0.67354	-0.441929	0.671719	-0.44375	-1.11547
P53985	SLC16A1	#N/A	#N/A	#N/A	8.92727	1.39747	3.88203	#N/A	#N/A	#N/A	-0.383664	-0.153684	0.22998
P56182	RRP1	47.0942	15.6121	31.4137	27.8401	11.4206	13.0054	1.45528	0.540717	1.06448	-0.914565	-0.390805	0.52376
P57088	TMEM33	36.275	33.136	27.0474	2.56994	4.91599	6.95018	1.12713	1.02675	1.45822	-0.100381	0.331092	0.431472
P61247	RPS3A	28.2591	17.0631	34.3691	13.2883	18.5813	25.474	0.837818	0.547718	1.50643	-0.2901	0.668611	0.958711
P61254	RPL26;RPL26L1	11.7115	6.24301	26.3652	3.13688	19.5948	19.9318	0.336582	0.232651	0.990857	-0.103931	0.654275	0.758205
P61313	RPL15	6.06064	0.850574	23.2375	7.54537	21.2406	25.3359	0.275947	0.0541592	1.30363	-0.221788	1.02768	1.24947
P61353	RPL27	22.0252	5.96764	47.9257	16.1088	42.8468	47.2243	0.720507	0.271248	2.25119	-0.449259	1.53068	1.97994
P61513	RPL37A	26.7052	23.4225	46.0039	0.565336	36.8852	34.4145	0.741266	0.720478	1.95105	-0.0207876	1.20979	1.23057
P62241	RPS8	14.6669	12.1224	28.8782	1.1727	22.2237	22.3807	0.491595	0.449284	1.44205	-0.0423107	0.950458	0.992769
P62244	RPS15A	14.0935	11.6558	26.0281	1.96296	16.5671	18.0323	0.450225	0.384874	1.03727	-0.0653509	0.58704	0.652391
P62249	RPS16	7.56875	5.89713	22.497	1.17926	20.9299	21.1039	0.3787	0.329043	1.23052	-0.0496565	0.851819	0.901475
P62263	RPS14	8.97571	0.287925	33.5917	11.4106	26.5705	34.8205	0.295066	-0.0136954	1.16499	-0.308761	0.869928	1.17869
P62266	RPS23	18.1851	13.2388	35.8278	0.997385	27.705	24.9635	0.512913	0.470063	1.46603	-0.0428499	0.953112	0.995962
P62280	RPS11	21.4491	15.1399	32.1492	4.99646	21.4258	24.1153	0.726906	0.572304	1.55619	-0.154601	0.829288	0.983889
P62424	RPL7A	14.8411	0.921778	21.2142	20.5835	11.8927	23.4632	0.555463	0.056097	1.11987	-0.499365	0.564412	1.06378
P62701	RPS4X;RPS4Y2	21.6831	11.8032	34.3289	12.2386	24.5971	30.2599	0.703784	0.436135	1.43738	-0.267649	0.733599	1.00125
P62750	RPL23A	52.1254	8.84054	43.8666	25.1936	0.166091	23.8864	1.78056	0.510213	1.77193	-1.27035	-0.00863266	1.26172
P62753	RPS6	9.85994	3.86385	17.6653	5.92105	8.08444	14.0865	0.343803	0.157228	0.650834	-0.186575	0.307032	0.493607
P62805	HIST1H4A	49.8615	3.529	46.5301	24.332	7.38142	27.6864	1.47664	0.240358	1.713	-1.23628	0.236362	1.47265
P62829	RPL23	20.5268	20.333	36.4461	0.855791	27.0932	24.7171	0.573037	0.601619	1.48588	0.0285823	0.91284	0.884258
P62851	RPS25	46.2443	20.3208	46.384	9.91314	10.8736	17.0389	1.43653	0.940634	1.7767	-0.4959	0.340161	0.836061
P62854	RPS26;RPS26P11	22.275	14.7504	46.6254	4.72783	39.6317	40.0908	0.65248	0.502102	2.11501	-0.150378	1.46253	1.61291
P62888	RPL30	9.14722	10.9948	30.9239	0.970752	25.4621	25.2214	0.346906	0.386643	1.34105	0.0397371	0.994144	0.954407
P62899	RPL31	5.9808	0.772966	21.7406	5.66978	13.7862	21.4431	0.235111	0.0344817	0.788484	-0.20063	0.553373	0.754002
P62917	RPL8	31.8709	3.95573	38.9003	26.9502	15.1359	36.9016	1.23633	0.234426	1.74131	-1.0019	0.504977	1.50688
P62987	UBA52;UBC;UBB;RPS27A	12.6265	15.3397	36.6735	4.70717	31.6808	27.5507	0.356423	0.524413	2.00295	0.16799	1.64652	1.47853
P63173	RPL38	3.35135	17.2468	34.0381	8.99919	23.2301	28.8528	0.229441	0.61249	1.61576	0.38305	1.38632	1.00327
P67809	YBX1	20.3005	5.05731	25.0744	21.9767	1.27713	27.4254	0.937328	-0.291988	1.03776	-1.22932	0.100437	1.32975
P68104	EEF1A1;EEF1A1P5	7.36366	8.19975	18.4541	21.9339	13.5315	26.1872	0.235878	-0.290237	0.718976	-0.526115	0.483098	1.00921
P68431	HIST1H3A	11.5294	7.96796	21.9573	1.00353	14.7911	13.4817	0.868152	0.734066	3.21709	-0.134086	2.34894	2.48303
P78344	EIF4G2	22.4101	7.07656	9.67371	11.5152	6.13094	2.05801	0.732737	0.329889	0.460551	-0.402849	-0.272186	0.130662
P78527	PRKDC	20.4552	6.50651	11.0009	20.0105	3.29382	6.17912	0.823303	0.318981	0.633388	-0.504323	-0.189915	0.314407
Q00839	HNRNPU	2.60212	4.61217	26.9245	11.6977	25.8177	30.6009	0.099109	-0.164105	1.32229	-0.263214	1.22318	1.4864
Q01780	EXOSC10	18.4765	7.37868	19.5757	15.5415	14.2739	20.6722	0.770195	0.381332	1.82712	-0.388863	1.05693	1.44579
Q01995	TAGLN	1.53633	21.7196	2.02	28.9808	1.19018	7.76506	0.0946967	0.872167	0.230799	0.77747	0.136102	-0.641368
Q02878	RPL6	17.7866	9.20363	19.8489	6.16534	6.18345	11.274	0.590843	0.368006	0.896319	-0.222837	0.305476	0.528313
Q02978	SLC25A11	3.03199	7.16454	31.544	3.98435	30.5568	27.1915	0.124571	0.248645	1.25131	0.124074	1.12673	1.00266
Q03135	CAV1	20.5988	21.7816	11.9889	7.73964	14.1402	18.6957	1.93534	2.13336	1.36172	0.198022	-0.573613	-0.771635
Q04446	GBE1	14.0277	37.6351	24.6039	25.8964	10.2917	11.841	0.498862	1.30108	0.875092	0.802219	0.37623	-0.425989
Q05D32	CTDSPL2	27.1721	8.6646	9.11821	17.5654	6.40516	2.22996	0.765533	0.31009	0.451296	-0.455443	-0.314237	0.141206
Q06210	GFPT1	#N/A	#N/A	#N/A	16.7331	7.56012	12.8462	#N/A	#N/A	#N/A	1.20628	0.43888	-0.767398
Q07065	CKAP4	0.000799006	5.4348	18.8849	2.79682	8.59373	20.0732	8.64667e-05	-0.284324	0.673663	-0.28441	0.673576	0.957987
Q07666	KHDRBS1	17.3911	0.701306	23.0868	27.3265	12.4182	29.9389	0.701426	-0.0518182	1.14558	-0.753244	0.444153	1.1974
Q08945	SSRP1	22.107	16.2005	12.3492	2.80817	1.0614	2.50316	0.593139	0.491533	0.678364	-0.101606	0.0852248	0.186831
Q09666	AHNAK	8.95902	28.6055	18.6511	20.0333	10.1739	3.22286	0.308496	0.896196	0.722998	0.5877	0.414502	-0.173197
Q12797	ASPH	2.08168	0.847807	35.6723	1.42774	36.5688	36.7303	0.0871201	0.0400283	1.44933	-0.0470918	1.36221	1.4093
Q12965	MYO1E	49.3314	40.138	36.3772	8.35393	24.1363	27.9857	2.12341	1.86915	4.08095	-0.254258	1.95754	2.21179
Q13111	CHAF1A	#N/A	#N/A	#N/A	16.6169	#N/A	#N/A	#N/A	#N/A	#N/A	-0.645037	#N/A	#N/A
Q13428	TCOF1	35.2959	35.5598	22.7191	8.804	3.35167	10.4826	1.27929	1.66252	1.09212	0.383232	-0.187172	-0.570404
Q13557	CAMK2D;CAMK2B;CAMK2G;CAMK2A	9.05015	15.9992	26.4913	3.39713	11.0021	4.70553	0.530046	0.828907	1.09153	0.298861	0.56148	0.262619
Q14247	CTTN	24.847	25.8148	21.2442	0.575636	28.4391	30.495	0.732802	0.756545	-1.76643	0.0237427	-2.49924	-2.52298
Q14315	FLNC	40.5121	50.8302	6.07952	20.1516	21.2847	32.3831	1.20466	1.68592	0.318684	0.481254	-0.885978	-1.36723
Q14498	RBM39	0.10687	24.4108	17.1544	27.672	19.1816	3.26282	-0.00568898	0.724623	0.581349	0.730312	0.587038	-0.143274
Q14669	TRIP12	19.7493	1.3346	2.55747	20.2409	13.2008	1.25529	0.630083	0.0730603	0.148589	-0.557023	-0.481494	0.0755291
Q14676	MDC1	40.4447	32.868	36.6789	11.276	4.06894	13.4528	1.95739	1.59666	2.17354	-0.360732	0.21615	0.576883
Q14684	RRP1B	46.6454	32.5931	44.569	10.7343	12.0633	19.0164	1.38959	1.07482	1.77421	-0.314772	0.384621	0.699392
Q14690	PDCD11	19.9443	13.4429	10.5994	10.8005	2.54762	0.875781	0.990712	0.732171	0.805001	-0.258541	-0.185712	0.0728296
Q14739	LBR	17.8091	5.5073	37.6386	11.498	27.9409	34.093	0.517271	0.207762	1.43915	-0.309509	0.921881	1.23139
Q14980	NUMA1	31.12	1.16148	13.9171	28.1771	12.166	13.6135	0.847675	-0.0680669	0.4901	-0.915742	-0.357576	0.558167
Q15050	RRS1	62.4193	28.8075	55.7509	29.517	4.66412	30.8091	2.49811	1.25268	2.6954	-1.24542	0.197289	1.44271
Q15075	EEA1	12.658	22.8642	2.83029	7.35744	6.59381	14.9991	0.452856	0.74246	0.148769	0.289604	-0.304087	-0.593691
Q15397	KIAA0020	22.5487	1.37661	25.3161	16.3089	7.90889	21.4893	0.783168	0.0887903	1.22014	-0.694378	0.436971	1.13135
Q15942	ZYX	15.2844	31.746	0.910512	20.202	5.2253	14.4002	0.439044	0.891575	0.0811323	0.452531	-0.357911	-0.810443
Q16778	HIST2H2BE;HIST1H2BB;HIST1H2BO;HIST1H2BA	21.265	18.8451	35.1334	0.735973	24.6701	18.7772	0.757498	0.795841	1.52818	0.0383428	0.770681	0.732339
Q2NL82	TSR1	31.0508	24.4079	36.5278	4.78242	18.4235	21.9776	1.19708	1.01346	1.97759	-0.183627	0.780503	0.96413
Q32MZ4	LRRFIP1	10.4547	33.027	21.9586	28.1505	13.9279	6.8218	0.329379	1.0177	0.749931	0.688316	0.420552	-0.267764
Q3KQU3	MAP7D1	71.6733	25.2496	49.8362	27.8935	21.9844	13.5353	2.69046	1.2575	2.02703	-1.43296	-0.663427	0.769528
Q3YEC7	RABL6	18.2808	31.3229	13.1753	21.5573	0.115112	16.5426	0.58644	1.32943	0.579848	0.742987	-0.00659244	-0.74958
Q43758	APEX2-EGFP	86.4238	77.7709	52.0097	20.2424	52.0338	43.4509	4.35285	3.91187	2.3121	-0.440976	-2.04075	-1.59977
Q49A26	GLYR1	29.5958	4.99527	23.61	27.8615	0.280146	20.3471	1.00688	0.234643	0.990754	-0.772235	-0.0161228	0.756112
Q4G0J3	LARP7	19.2064	1.95751	0.892723	15.7618	15.6547	0.756941	0.525269	0.0942713	0.0496324	-0.430997	-0.475636	-0.0446389
Q4KMP7	TBC1D10B	18.5379	6.56843	11.9069	4.16914	3.34135	1.55025	0.760612	0.501729	0.62455	-0.258883	-0.136061	0.122821
Q52LW3	ARHGAP29	21.2631	16.4346	3.91948	2.68914	26.0698	22.9329	1.08624	0.940766	-0.349733	-0.145473	-1.43597	-1.2905
Q5C9Z4	NOM1	39.2935	32.0414	34.9886	9.34239	13.6171	18.9886	1.51118	1.28789	2.01398	-0.223289	0.502797	0.726086
Q5JRC6	PHF6	#N/A	#N/A	#N/A	#N/A	#N/A	#N/A	#N/A	#N/A	#N/A	#N/A	#N/A	#N/A
Q5JTH9	RRP12	20.3849	16.3653	8.70254	0.877361	9.06432	6.9004	0.764605	0.816113	0.450933	0.0515079	-0.313672	-0.36518
Q5QJE6	DNTTIP2	44.9895	26.4348	28.8002	20.1302	6.96183	5.23973	1.24064	0.764184	0.9943	-0.47646	-0.246343	0.230117
Q5QPR4	CDK11A;CDK11B	#N/A	#N/A	#N/A	3.97971	0.911667	5.9949	#N/A	#N/A	#N/A	-0.220724	0.0705872	0.291311
Q5SW79	CEP170	39.594	46.9219	30.6475	13.2702	0.988793	11.4061	1.20935	1.62468	1.15208	0.415329	-0.0572662	-0.472595
Q5T760	SRSF11	11.3893	19.7575	8.84292	9.29205	0.112748	5.6723	0.342599	0.587701	0.348469	0.245103	0.00587018	-0.239232
Q5TEC6	HIST2H3PS2	31.5132	8.86988	47.8286	19.4523	34.0845	42.4933	1.00981	0.374755	2.42712	-0.63506	1.4173	2.05236
Q5VVC8	RPL11	13.7246	18.5454	26.9265	5.68933	18.1812	10.4532	0.374536	0.525977	0.903995	0.151441	0.529459	0.378018
Q66K74	MAP1S	0.0633811	9.86341	20.3467	13.5175	25.3619	15.6522	0.00474929	0.541667	1.50579	0.536917	1.50105	0.964128
Q6DKI1	RPL7L1	26.5617	13.7113	23.6938	11.2397	2.61186	11.3565	0.865524	0.51	1.00419	-0.355524	0.138663	0.494187
Q6NZI2	PTRF	77.0996	69.9831	37.1789	10.6841	41.9253	36.8507	3.30763	3.05143	1.57653	-0.256194	-1.73109	-1.4749
Q6PKG0	LARP1	1.30997	0.0833349	19.9395	1.70803	18.8735	20.6678	0.0809898	-0.00623894	1.93507	-0.0872288	1.85408	1.94131
Q6ZUT6	C15orf52	#N/A	#N/A	#N/A	#N/A	#N/A	12.4078	#N/A	#N/A	#N/A	#N/A	#N/A	0.713342
Q70UQ0	IKBIP	8.52862	2.12136	18.4834	7.65233	30.925	23.575	-0.294472	-0.100963	0.739347	0.193509	1.03382	0.84031
Q71DI3	HIST2H3A	31.4753	9.35215	25.3072	18.1257	0.0507217	15.1682	1.45204	0.596757	1.45597	-0.855282	0.00392914	0.859211
Q76M96	CCDC80	25.3698	4.97884	17.111	28.5381	6.28302	16.7385	1.20327	0.342486	0.982283	-0.860782	-0.220985	0.639797
Q7L2J0	MEPCE	#N/A	#N/A	#N/A	2.51323	4.41446	4.6293	#N/A	#N/A	#N/A	-0.147575	0.310031	0.457606
Q7Z406	MYH14	17.4423	32.0231	10.4393	22.8611	1.68114	18.4278	0.649349	1.38165	0.551813	0.732306	-0.0975361	-0.829842
Q86UE4	MTDH	13.7959	0.666444	32.9476	5.4678	25.8982	20.0619	0.398803	0.0566648	1.14713	-0.342138	0.748323	1.09046
Q8IXI1	RHOT2	#N/A	#N/A	#N/A	35.8402	#N/A	#N/A	#N/A	#N/A	#N/A	1.83938	#N/A	#N/A
Q8IY81	FTSJ3	23.0065	15.4514	24.657	7.56917	8.16448	14.2084	0.978912	0.720127	1.39436	-0.258785	0.415451	0.674236
Q8N556	AFAP1	#N/A	#N/A	#N/A	#N/A	#N/A	4.61444	#N/A	#N/A	#N/A	#N/A	#N/A	0.233821
Q8NC51	SERBP1	3.67876	1.81567	31.5814	1.46107	35.4948	34.3414	-0.200428	-0.110819	1.26738	0.0896091	1.46781	1.3782
Q8NE71	ABCF1	27.2753	18.1115	28.1305	7.63707	9.07008	13.9081	0.73997	0.546839	1.0666	-0.193131	0.326628	0.519759
Q8NFC6	BOD1L1	20.0544	0.682818	8.39715	18.3272	13.0513	6.91811	1.07625	0.0664654	0.469839	-1.00978	-0.606411	0.403374
Q8NFW8	CMAS	8.46262	14.2902	24.8435	8.55322	22.4735	15.9266	0.354399	0.577003	1.28294	0.222604	0.928542	0.705938
Q8TAQ2	SMARCC2	2.74774	5.90423	22.2141	12.0066	20.2861	27.185	0.145	-0.292568	1.49035	-0.437569	1.34534	1.78291
Q8TCJ2	STT3B	1.24273	0.698965	21.6866	0.960271	23.8755	25.7618	0.0972354	0.0577526	1.6506	-0.0394828	1.55336	1.59284
Q8TDD1	DDX54	26.0196	16.3961	27.555	9.65887	8.97006	15.3399	0.850499	0.603394	1.17337	-0.247105	0.322873	0.569979
Q8TDN6	BRIX1	26.1525	22.2661	29.1966	3.37834	8.7746	12.1524	0.82637	0.708331	1.17896	-0.118039	0.352589	0.470628
Q8WTT2	NOC3L	24.5667	14.3438	18.888	7.65839	0.274276	4.68599	0.780951	0.541961	0.766143	-0.23899	-0.014808	0.224182
Q8WUM4	PDCD6IP	17.6329	30.7225	23.9313	16.2508	37.7001	44.537	0.503636	0.876421	-0.896564	0.372785	-1.4002	-1.77298
Q8WWK9	CKAP2	#N/A	#N/A	#N/A	3.46723	11.4355	9.38841	#N/A	#N/A	#N/A	0.1196	0.662464	0.542864
Q8WWQ0	PHIP	30.5199	20.5249	21.461	19.4232	10.0366	3.31548	1.6545	1.14379	1.29537	-0.51071	-0.359125	0.151586
Q93052	LPP	18.5956	28.7648	28.8824	12.6082	43.6008	47.7673	0.532104	0.864447	-1.00258	0.332342	-1.53469	-1.86703
Q969Q0	RPL36AL	37.2233	25.8691	30.4054	3.28334	2.24729	4.54181	0.991993	0.861557	1.09291	-0.130436	0.100918	0.231354
Q96AG4	LRRC59	30.7871	11.8514	1.32932	25.5801	35.9481	17.0401	1.38439	0.641408	-0.117761	-0.742978	-1.50215	-0.759169
Q96GP6	SCARF2	#N/A	#N/A	#N/A	#N/A	#N/A	20.0282	#N/A	#N/A	#N/A	#N/A	#N/A	0.638739
Q96HC4	PDLIM5	23.8501	37.8807	14.773	23.2549	2.89992	18.8117	0.672888	1.17967	0.55192	0.506777	-0.120969	-0.627745
Q96IZ0	PAWR	15.0168	28.9502	25.4989	16.0412	13.2588	0.707647	0.506065	0.917503	0.955404	0.411438	0.44934	0.0379016
Q96MU7	YTHDC1	21.9604	11.7258	24.4321	9.52303	8.90283	16.4002	0.731639	0.421117	1.20627	-0.310523	0.47463	0.785153
Q96N66	MBOAT7	27.694	14.1543	29.2348	18.5598	13.981	23.0502	0.949809	0.528524	1.69616	-0.421285	0.746349	1.16763
Q96PU4	UHRF2	#N/A	#N/A	#N/A	#N/A	#N/A	8.7713	#N/A	#N/A	#N/A	#N/A	#N/A	0.754028
Q96S97	MYADM	27.1397	33.2255	26.2996	13.758	11.0094	3.55378	0.873781	1.20636	1.44614	0.332577	0.572359	0.239782
Q99575	POP1	42.5293	1.86714	27.0461	39.5778	11.2257	26.8453	1.27342	-0.101482	0.924754	-1.37491	-0.34867	1.02624
Q99590	SCAF11	21.2474	8.76667	29.0684	3.44832	16.2779	13.2812	0.718034	0.511121	1.20495	-0.206913	0.486912	0.693825
Q9BQ39	DDX50	24.0755	18.2799	26.4282	3.62245	9.58328	11.6671	0.699769	0.590691	1.04688	-0.109079	0.347108	0.456187
Q9BQE3	TUBA1C	8.59141	27.8824	1.90815	24.2295	2.13841	16.0799	0.280053	0.970773	0.139305	0.69072	-0.140748	-0.831468
Q9BQG0	MYBBP1A	32.074	25.1765	22.5757	3.54458	2.71658	0.117766	0.890202	0.770035	0.777086	-0.120167	-0.113117	0.0070502
Q9BRT6	LLPH	53.0851	32.488	48.102	17.9759	5.17369	19.8344	1.89685	1.30359	2.07688	-0.593265	0.180028	0.773293
Q9BSC4	NOL10	#N/A	#N/A	#N/A	5.51139	1.97999	6.5881	#N/A	#N/A	#N/A	-0.383236	0.21237	0.595606
Q9BTV4	TMEM43	17.8534	15.9847	26.4921	0.465817	17.7801	17.0287	0.757049	0.738389	1.45001	-0.0186596	0.692958	0.711617
Q9BUQ8	DDX23	14.1187	6.01682	25.3438	9.28007	14.6508	22.9828	0.510797	0.248782	1.04297	-0.262015	0.53217	0.794185
Q9BVP2	GNL3	45.2421	37.4228	41.2457	5.893	11.3389	15.4329	1.64224	1.44803	2.1105	-0.194209	0.468257	0.662466
Q9BW60	ELOVL1	34.6207	28.5838	36.2482	8.8306	12.7559	20.418	1.24611	0.986938	1.80385	-0.259175	0.557732	0.816907
Q9BYG3	NIFK	9.28124	14.0019	36.607	5.63417	38.5592	31.7026	0.364445	0.573469	1.792	0.209024	1.42755	1.21853
Q9BZE4	GTPBP4	29.2574	14.3809	9.49457	16.3335	5.18832	0.914375	0.776791	0.428641	0.494889	-0.34815	-0.281902	0.0662479
Q9BZI7	UPF3B	50.6914	27.6187	42.1352	34.8302	3.77197	28.7847	2.54445	1.03368	2.28634	-1.51077	-0.258109	1.25266
Q9GZS1	POLR1E	#N/A	#N/A	#N/A	0.792942	8.16709	7.713	#N/A	#N/A	#N/A	-0.0440623	0.425857	0.469919
Q9H0A0	NAT10	20.8055	21.9868	21.8903	0.265205	5.7052	5.33081	0.583563	0.594323	0.84408	0.01076	0.260516	0.249756
Q9H0H5	RACGAP1	#N/A	#N/A	#N/A	0.477816	15.0581	13.3247	#N/A	#N/A	#N/A	0.0219752	0.615437	0.593461
Q9H307	PNN	49.826	32.7835	12.762	0.949066	31.8458	20.1195	1.48755	1.42604	0.469317	-0.0615158	-1.01824	-0.95672
Q9H4L4	SENP3;SENP3-EIF4A1	#N/A	#N/A	#N/A	#N/A	#N/A	12.7722	#N/A	#N/A	#N/A	#N/A	#N/A	0.541186
Q9H583	HEATR1	21.4424	11.5871	2.42482	11.3522	16.8184	11.7011	1.11204	0.71048	-0.324753	-0.401564	-1.4368	-1.03523
Q9H6F5	CCDC86	40.0652	7.55239	42.0397	19.0982	4.91371	24.2066	2.94887	1.01255	3.26223	-1.93632	0.313356	2.24968
Q9H7B2	RPF2	23.2896	5.29395	23.8594	16.1053	7.49071	18.1739	0.663504	0.225583	0.971195	-0.43792	0.307691	0.745611
Q9H9Y2	RPF1	54.1603	27.2622	17.8541	23.6695	22.2616	2.43971	1.67191	0.929487	0.765214	-0.742425	-0.906698	-0.164273
Q9HB71	CACYBP	0.851907	20.4995	0.591123	24.9517	0.112047	10.2835	0.0417875	0.60876	0.0510626	0.566973	0.00927512	-0.557698
Q9HD45	TM9SF3	5.58951	2.03426	18.2256	9.7377	14.9071	16.5573	0.203091	-0.116152	1.02205	-0.319244	0.818963	1.13821
Q9NQ29	LUC7L	2.82557	#N/A	18.9163	#N/A	16.3856	#N/A	0.156738	#N/A	1.45128	#N/A	1.29454	#N/A
Q9NQW6	ANLN	54.5038	46.9603	45.1862	8.31646	29.2936	22.7777	2.44527	2.76074	4.13903	0.315468	1.69376	1.37829
Q9NR30	DDX21	42.2307	33.8614	31.5182	5.38423	2.52658	1.09644	1.23091	1.06223	1.12278	-0.168687	-0.108136	0.0605507
Q9NSV4	DIAPH3	#N/A	#N/A	#N/A	#N/A	16.1199	#N/A	#N/A	#N/A	#N/A	#N/A	-1.0573	#N/A
Q9NUQ6	SPATS2L	27.1753	10.0264	29.507	29.809	13.0867	29.1008	1.17638	0.518342	1.70346	-0.658037	0.527082	1.18512
Q9NVP1	DDX18	28.6253	28.7965	34.624	1.75946	17.4033	14.1699	0.756568	0.812187	1.33586	0.0556196	0.579296	0.523677
Q9NW13	RBM28	31.4038	28.178	33.2533	0.153901	12.2974	10.0138	1.33992	1.34768	1.78892	0.007761	0.449	0.441239
Q9NWT1	PAK1IP1	#N/A	#N/A	#N/A	8.48598	1.83973	3.60452	#N/A	#N/A	#N/A	0.266068	0.0821171	-0.183951
Q9NZ01	TECR	17.299	0.335962	15.5956	13.1182	2.30833	13.6071	0.855688	0.0391375	1.02361	-0.816551	0.167918	0.984468
Q9NZM5	GLTSCR2	#N/A	#N/A	#N/A	56.4823	36.4744	18.1657	#N/A	#N/A	#N/A	-3.84632	-2.39532	1.451
Q9NZN4	EHD2	45.7651	42.2164	11.0982	0.645139	31.9748	29.7054	1.48144	1.50904	0.445615	0.0276095	-1.03582	-1.06343
Q9P0K7	RAI14	#N/A	#N/A	#N/A	9.50107	16.3001	21.2398	#N/A	#N/A	#N/A	0.313654	-0.631255	-0.944909
Q9P258	RCC2	12.2851	14.9572	41.2662	4.03881	40.7147	32.0147	0.42669	0.572146	1.71469	0.145456	1.288	1.14255
Q9UGP8	SEC63	7.74991	14.8181	30.1027	8.17332	26.4234	22.5132	0.254412	0.475636	1.69988	0.221224	1.44546	1.22424
Q9UIG0	BAZ1B	28.2239	7.77507	14.1646	31.4249	6.39948	11.636	1.11458	0.349275	0.831629	-0.765304	-0.28295	0.482354
Q9UIS9	MBD1	#N/A	#N/A	#N/A	3.70843	0.0550923	2.35836	#N/A	#N/A	#N/A	-0.130161	-0.00263723	0.127524
Q9ULC4	MCTS1	0.157852	0.845711	39.1501	0.657332	23.3835	34.2969	-0.0155023	0.0518366	1.42371	0.0673389	1.43922	1.37188
Q9UQ35	SRRM2	32.9085	28.0358	24.7012	0.459069	1.42603	1.50481	0.870319	0.891061	0.809359	0.0207418	-0.0609608	-0.0817025
Q9Y295	DRG1	#N/A	#N/A	#N/A	9.73561	0.511912	6.74657	#N/A	#N/A	#N/A	-0.459532	0.0538375	0.513369
Q9Y383	LUC7L2	32.0619	23.9776	40.0277	0.624796	20.6141	13.3733	0.864273	0.899891	1.48877	0.0356178	0.6245	0.588882
Q9Y3B9	RRP15	33.1094	14.7487	40.044	2.53651	15.1139	10.9554	1.26201	1.02236	1.81236	-0.239649	0.55035	0.79
Q9Y3T9	NOC2L	31.2373	21.6135	8.85761	10.3106	12.1931	5.13973	1.07896	0.816391	0.521779	-0.262565	-0.557177	-0.294612
Q9Y3U8	RPL36	61.4704	14.6863	48.1848	33.2674	10.5297	25.3709	2.1721	0.660449	1.83346	-1.51165	-0.338634	1.17302
Q9Y450	HBS1L	#N/A	#N/A	#N/A	#N/A	#N/A	8.90325	#N/A	#N/A	#N/A	#N/A	#N/A	0.469568
Q9Y4B5	MTCL1	#N/A	#N/A	#N/A	4.11255	7.33019	1.5246	#N/A	#N/A	#N/A	-0.146485	-0.236928	-0.090443
Q9Y5J1	UTP18	#N/A	#N/A	#N/A	20.1844	7.66078	2.97369	#N/A	#N/A	#N/A	0.725964	0.497581	-0.228383
U3KQK0	HIST1H2BN;HIST1H2BM;HIST1H2BH;HIST2H2BF;HIST1H2BC;HIST1H2BD;HIST1H2BL	22.2772	7.18957	31.0335	8.38586	14.8976	19.5196	0.780771	0.395091	1.26031	-0.38568	0.479541	0.86522
V9GYM8	ARHGEF2	#N/A	#N/A	#N/A	21.7374	0.203271	12.2101	#N/A	#N/A	#N/A	-0.527839	-0.0115121	0.516327
X1WI28	RPL10	33.8913	14.3519	37.0963	24.7464	14.1356	30.8296	1.15882	0.528144	1.67317	-0.630681	0.51434	1.14502
X6R700	CHTOP	52.2018	6.49617	39.3212	48.5472	2.96521	35.3339	1.68437	0.243298	1.5541	-1.44107	-0.130265	1.31081

## Sheet: all identified
Protein.IDs	Proteins	Genes	LFQ.intensity.504_MQQC_HS_NES.NTA	LFQ.intensity.506_MQQC_HS_NES.NTC	LFQ.intensity.507_MQQC_HS_NES.NTD	LFQ.intensity.765_MQQC_HS_RG_30REC_A	LFQ.intensity.766_MQQC_HS_RG_30REC_B	LFQ.intensity.767_MQQC_HS_RG_30REC_C	LFQ.intensity.769_MQQC_HS_RG_30A	LFQ.intensity.770_MQQC_HS_RG_30B	LFQ.intensity.771_MQQC_HS_RG_30C	LFQ.intensity.790_MQQC_HS_RG_CAV1_B	LFQ.intensity.791_MQQC_HS_RG_CAV1_C	LFQ.intensity.792_MQQC_HS_RG_CAV1_D	LFQ.intensity.793_MQQC_HS_RG_NES_A	LFQ.intensity.795_MQQC_HS_RG_NES_C	LFQ.intensity.796_MQQC_HS_RG_NES_D	iBAQ.504_MQQC_HS_NES.NTA	iBAQ.506_MQQC_HS_NES.NTC	iBAQ.507_MQQC_HS_NES.NTD	iBAQ.765_MQQC_HS_RG_30REC_A	iBAQ.766_MQQC_HS_RG_30REC_B	iBAQ.767_MQQC_HS_RG_30REC_C	iBAQ.769_MQQC_HS_RG_30A	iBAQ.770_MQQC_HS_RG_30B	iBAQ.771_MQQC_HS_RG_30C	iBAQ.790_MQQC_HS_RG_CAV1_B	iBAQ.791_MQQC_HS_RG_CAV1_C	iBAQ.792_MQQC_HS_RG_CAV1_D	iBAQ.793_MQQC_HS_RG_NES_A	iBAQ.795_MQQC_HS_RG_NES_C	iBAQ.796_MQQC_HS_RG_NES_D
A0A2R8YD12;A0A024QZX5;A0A087X1N8;P35237;A0A2R8Y6A7;C9JTJ8	Serpin B6	SERPINB6	34179000	0	20223000	0	0	0	0	0	0	0	0	0	0	0	0	1840300	634400	702020	128120	102990	279020	175680	85421	286490	142030	53876	105370	100450	242780	358810
A0A024R4E5;Q00341;H0Y394;H7C0A4;H7C2D1;H7BZC3;C9JIZ1;C9J5E5;C9JZI8;C9JHZ8;C9JHS7;C9JES8;C9JK79;C9JT62;C9JHN6;C9JEJ8;C9JBS3;C9JQ82;C9JMQ6;C9J739;H7C3D0;C9JHS9	Vigilin	HDLBP	548150000	542980000	802100000	903210000	590370000	584970000	346330000	389470000	465370000	615920000	577890000	454670000	496390000	710850000	549870000	6185600	5637500	6273400	7127100	5838100	6854900	5605700	5674300	4877200	3071200	2151300	2185800	2233500	4868700	2861900
A0A024R571;Q9H4M9;C9JC03;C9J2Z4;C9JDQ8;Q9NZN3	EH domain-containing protein 1	EHD1	25087000	33025000	0	37302000	32201000	54222000	0	0	21950000	35853000	31638000	43648000	30000000	44861000	23897000	1142600	1092100	188690	396030	653960	851450	143740	0	123040	577290	542330	646120	325670	667660	381310
A0A024RA52;P25787;C9JCK5;H7C402;H3BT36	Proteasome subunit alpha type;Proteasome subunit alpha type-2	PSMA2	64118000	40838000	0	0	0	0	30080000	0	0	0	0	0	54402000	36642000	55923000	5321300	3143000	0	0	0	0	778260	0	0	0	0	0	2245300	1036600	1645800
A0A024RAC6;Q14241	Transcription elongation factor B polypeptide 3	TCEB3	0	0	0	0	17643000	0	17347000	16641000	14598000	16587000	19400000	19998000	0	0	0	0	0	0	0	117820	17441	159540	524450	151930	236180	214010	215530	0	0	0
P46379;A0A0G2JK23;A0A024RCR6;A0A0G2JL47;A0A0G2JJM1;X6REW1;F6S6P2;F6TC96;F6U341;F6X9W3;H0Y4L1;F6WML8;A0A1B0GX79;A0A0G2JJR8;H0Y710;F6XTU0;F6U1F2;F6UR09;F6VEM6	Large proline-rich protein BAG6	BAG6;BAT3	21651000	22133000	52166000	21308000	0	11581000	0	0	9920700	17854000	29879000	18117000	12188000	43368000	25846000	1020900	683140	1325200	282840	40090	135490	14458	31471	119130	129970	247200	151020	108790	682910	402260
Q16881;A0A087WSY9;A0A182DWI3;A0A087WSW9;F8W809;E9PIR7;E2QRB9;E9PKD3;A0A0B4J225;E9PIZ5;E9PKI4;E9PLT3;E9PQI3;A0A182DWF2;E7EWK1;D3YTF8;A0A182DWF3;A0A096LPD9;E9PJU2;Q9NNW7;A0A096LPK7	Thioredoxin reductase 1, cytoplasmic	TXNRD1	292910000	195840000	126730000	89038000	103140000	124000000	150810000	55169000	47808000	58942000	50409000	72882000	160180000	89745000	142330000	10743000	6496900	2718200	691400	874160	1853400	2832100	823870	738860	896390	571950	731300	2382300	1575600	2015400
B3KME9;A0A087WT20;Q9NV06;E5RHM4	DDB1- and CUL4-associated factor 13	DCAF13	0	0	0	0	0	0	0	22928000	0	0	0	0	0	0	0	141440	0	131370	0	0	144130	426850	1147200	562270	94685	16967000	14374000	13549000	13317000	12377000
H0Y8I3;A0A087WT27;A0A494C1Q4;A0A494C1E2;A0A494C0G1;O95394	Phosphoacetylglucosamine mutase	PGM3	0	0	0	0	0	0	0	0	0	0	0	0	0	0	8086700	1082700	894720	0	0	0	0	0	0	0	263480	0	0	567900	0	802130
A0A087WTA5;E7ERK9;Q9UI10;A0A087WW69;H7C2L8;F8W8L6	Translation initiation factor eIF-2B subunit delta	EIF2B4	0	0	0	16966000	17360000	20773000	23209000	49142000	47984000	16501000	17284000	15367000	9936400	13393000	15366000	155780	183600	143370	307020	227900	506720	686990	1228700	1168800	385450	319010	309080	128590	197740	121020
A0A087WTP3;Q92945;M0R0I5;M0R3J3;M0R251;M0QYG1;M0QXW7;M0R263;M0QYH3;M0R0C6	Far upstream element-binding protein 2	KHSRP	85895000	67315000	22707000	18846000	24605000	24418000	33076000	0	19378000	21391000	0	0	60331000	38844000	49679000	2575900	1715500	687300	154650	271900	297000	461450	62202	269740	137230	32049	56899	783900	878300	718030
P11940;A0A087WTT1;E7ERJ7;E7EQV3;Q9H361;H0YAR2;Q4VXU2;H0YBN4;E5RJB9;H0YB75;H0YAS6;H0YB86;H0YAP2;E5RH24;E5RGH3;H0YAS7;E5RHG7;B1ANR1;E5RGC4;H0Y6X6;H0YER0;E5RFD8;Q5JQF8;Q96DU9;H0YC10	Polyadenylate-binding protein 1;Polyadenylate-binding protein;Polyadenylate-binding protein 3	PABPC1;PABPC3	128180000	84562000	54349000	41812000	53951000	72891000	34355000	0	17780000	33822000	37385000	15770000	102930000	66943000	105250000	5483700	3080100	1639800	454610	656050	650420	451970	0	566180	234520	220170	80467	974430	767510	991720
A0A0C4DH00;A0A087WTU1;A0A0B4J2G4;Q15345	Leucine-rich repeat-containing protein 41	LRRC41	0	0	0	0	0	0	0	0	0	0	0	0	0	9243400	0	91218	96634	165810	0	0	0	0	0	0	59101	66119	0	71702	235270	0
A0A087WTV2;K7ENH2;K9J957;P61289;B7Z8D3;B3KQ25;K7ESG5	Proteasome activator complex subunit 3	PSME3	0	209720	0	0	0	0	0	0	0	0	0	0	0	0	0	185550	19001	0	0	0	0	0	0	0	0	0	0	300200	0	0
A0A087WU14;A0A087WXB0;O15126	Secretory carrier-associated membrane protein 1	SCAMP1	0	0	7220200	0	0	0	0	0	0	0	0	0	0	0	0	1207200	1163700	707800	0	0	0	0	0	0	0	0	0	0	0	0
A0A087WUD3;Q9NRP0	Oligosaccharyltransferase complex subunit OSTC	OSTC	0	0	0	0	0	0	0	0	0	0	0	0	0	0	5638000	4977700	2261400	4148400	3163700	2121500	3512000	4602700	8247000	8458600	2017000	1686800	1353000	1535500	2074800	1118500
A0A0G2JNN3;C9JMY0;A0A087WUE4;Q96PV6;E7EWC7	Leukocyte receptor cluster member 8	LENG8	0	0	0	0	0	0	0	22166000	0	0	0	0	0	0	0	0	0	0	126080	0	156490	0	500880	218240	0	73136	75813	0	0	0
A0A087WUE9;Q92797;M0R3C7;M0R1C2;M0R180;M0QXP5	Symplekin	SYMPK	0	13580000	21558000	0	0	0	0	0	0	0	0	0	0	0	0	34417	175300	313740	0	0	0	0	0	0	0	0	0	0	0	0
A0A087WUK2;O14979	Heterogeneous nuclear ribonucleoprotein D-like	HNRNPDL	60183000	40042000	13962000	0	0	25514000	31154000	0	0	0	0	0	46557000	29140000	39931000	2738900	2100700	217100	154080	246280	398660	980140	0	499600	0	50247	0	928220	805100	816420
A0A087WUL2;P49720;A0A087WXQ8;A0A087WY10	Proteasome subunit beta type-3	PSMB3	0	0	0	0	0	0	14434000	0	0	0	0	0	22577000	0	28332000	2463400	1576000	0	72230	78959	0	458060	0	0	77409	84811	0	1257300	317680	1297700
A0A087WUL9;Q9UNM6;E9PL38;J3KNQ3;E9PQG3;E9PPD2;H0YD73;F8W8J6	26S proteasome non-ATPase regulatory subunit 13	PSMD13	0	0	0	0	10593000	0	15933000	0	12156000	0	0	0	18061000	10785000	16631000	598350	316150	223840	30144	116150	164020	325950	30752	266350	102480	44626	89315	413570	229280	236230
A0A087WUT6;O60841	Eukaryotic translation initiation factor 5B	EIF5B	138870000	158950000	331030000	337340000	273530000	265650000	196210000	272470000	267740000	169460000	205990000	245720000	129910000	144530000	192500000	2396400	3016100	5819600	2815300	2307600	2927600	1731200	3958100	3549600	1204500	1255600	1622300	808980	1385100	1090700
A0A087WVM4;B7ZM99;Q6UB35;H0Y327;Q4VXM1;Q4VXM0;Q4VXV2;Q5JYA8;Q5JYA3	Monofunctional C1-tetrahydrofolate synthase, mitochondrial	MTHFD1L	29035000	26515000	33987000	22288000	0	10830000	0	0	0	16117000	17754000	0	0	20888000	23653000	667130	819800	660190	88437	103440	33738	0	25969	45804	105210	111330	39489	84792	358740	132200
A0A087WVP4;A0A087X1R1;P53814;A0A096LNK9;H7BZZ8;B5MCI0	Smoothelin	SMTN	0	0	0	41661000	32008000	33188000	35192000	49009000	41644000	0	0	51280000	0	0	0	123830	120490	52451	240770	172870	148680	192740	435210	496550	740510	680300	1007000	0	1501400	0
A0A087WVQ6;Q00610;J3KS13;P53675;A0A087WX41;K7EJJ5;J3KRF5;J3KSQ2;J3QL20;F5H5N6;A0A087WV74;A0A087WXH4	Clathrin heavy chain;Clathrin heavy chain 1	CLTC	1283700000	1114500000	1368100000	1416200000	1300600000	1350400000	791650000	746040000	824110000	1122900000	1135300000	1157700000	1168200000	1129600000	1123000000	17391000	12583000	11951000	6421100	6260300	7332700	4385300	5105000	5526300	5069500	4062400	4858200	4996300	7476000	4817900
A0A087WW40;Q9Y371	Endophilin-B1	SH3GLB1	4081700	0	0	0	0	0	0	0	0	0	0	0	0	0	0	255110	0	0	0	0	0	0	0	0	0	0	0	0	0	0
A0A087WW66;Q99460;H7BZR6;H7C378;C9J9M4	26S proteasome non-ATPase regulatory subunit 1	PSMD1	40550000	21349000	17339000	0	0	16273000	0	0	14454000	0	0	15843000	23065000	18765000	19792000	1113000	847350	236200	75365	67755	110480	87457	0	115110	68694	50994	76743	157440	150720	125490
A0A087WWA3;Q4R9M9;O60333;A0A0U1RQL3	Kinesin-like protein;Kinesin-like protein KIF1B	KIF1B;KIF1Bbeta	0	0	0	0	0	0	0	0	0	0	0	0	0	99207000	0	428610	518600	256010	170460	234170	183670	460010	592740	686620	220460	182190	237390	294830	566860	248310
A0A494C001;A0A499FJY3;A0A087WWP4;Q96T37;Q8NDT2	Putative RNA-binding protein 15	RBM15	22689000	21130000	22378000	20527000	18797000	22756000	33318000	54839000	48720000	28533000	27251000	31869000	20326000	26837000	25358000	468050	513100	292060	173820	208020	221300	298970	909410	833110	212460	194520	205850	95942	326450	99176
A0A087WWP8;A0A0C4DGT8;Q5VWQ0;A0A0C4DH79	Round spermatid basic protein 1	RSBN1	0	0	0	0	0	21285000	39917000	25127000	20620000	29117000	28261000	35136000	33454000	23872000	0	135870	136430	0	59165	161830	541310	947000	432780	395700	292150	307010	357830	367360	231040	46015
A0A087WWU8;A0A494C0P6;D6R904;A0A494C0G0;H0YL80;Q5VU61		TPM3	536430000	389090000	193830000	229420000	283840000	298800000	422650000	135680000	130730000	141750000	115040000	175880000	441390000	292980000	343250000	49253000	31952000	10798000	5453400	7996200	10142000	15031000	4164600	4579100	3382800	1785800	2624800	9089900	8770400	6531100
Q16186;A0A087WX59;A0A087WUX6	Proteasomal ubiquitin receptor ADRM1	ADRM1	14966000	16952000	7708200	0	0	0	0	0	0	0	0	0	16835000	12240000	16526000	1389500	1321000	498650	157500	166810	199630	394510	361730	300670	147680	121450	164460	570150	678380	590720
E7ESZ7;A0A087WXC5;O95299	NADH dehydrogenase [ubiquinone] 1 alpha subcomplex subunit 10, mitochondrial	NDUFA10	0	0	0	0	0	0	0	0	0	0	0	0	0	24881000	0	528820	656430	314640	0	0	0	0	849870	699020	0	32921	0	362200	605750	145250
A0A0D9SEW3;A0A087WXF8;Q9NP64;A0A087WXU5;A0A087WYV3;A0A087WYF0	Nucleolar protein of 40 kDa	ZCCHC17	19476000	18930000	37011000	32092000	34891000	42918000	0	0	0	0	0	0	33412000	24464000	24349000	1939200	1459200	2647700	1171100	1341400	1430000	705790	396330	0	0	0	277140	1199500	764280	702190
A0A087WXM6;J3QQT2;J3KRX5;A0A0A6YYL6;P18621;J3QLC8;A0A0A0MRF8;J3KRB3;A0A087WWH0;J3QS96;A0A087WY81;J3KSJ0	60S ribosomal protein L17	RPL17;RPL17-C18orf32	881110000	833820000	755090000	938860000	1096300000	1120400000	2039500000	2676700000	2475800000	1283400000	1359400000	1271200000	561000000	776020000	672770000	92539000	85319000	55786000	42906000	50052000	61337000	138450000	202230000	192610000	62889000	52811000	55603000	26510000	45919000	30567000
A0A087WXP3;E9PEE8;P18564	Integrin beta;Integrin beta-6	ITGB6	0	0	29518000	0	0	0	0	0	0	0	0	0	0	0	0	0	1580200	595750	0	0	0	0	0	0	0	0	0	0	0	0
A0A499FIX8;H7BXI1;A0A087WXU3;A0FGR8	Extended synaptotagmin-2	ESYT2	0	0	0	38947000	50230000	33556000	23188000	45699000	18990000	25369000	26871000	0	0	0	0	186930	74857	128530	469010	729250	339300	328160	541440	441940	201660	191480	91329	0	71998	0
A0A087WY00;G3V394;F8WE88;F8W6H6;Q9Y4I1;E7ERV5;Q9NQX4;G3V3C9;Q9UES5;O95317;H0YMK3;Q9ULV0;H0YM96;H0YM93	Unconventional myosin-Va	MYO5A	127730000	126820000	347090000	230510000	135500000	135110000	166770000	284170000	313900000	150010000	178220000	160060000	93936000	188770000	148720000	1326700	1092400	2607700	1303600	738770	611180	1000100	2887900	2751400	702050	495780	345210	126280	1000500	455650
A0A087WY03;E5RFV3		SREK1	19132000	22182000	16119000	30820000	35189000	44407000	33649000	37177000	40746000	27148000	23067000	24972000	19557000	19636000	20518000	5565600	4186500	3410900	3421900	4269000	6145900	3304700	7149400	6909900	3173500	2652800	2644700	1210700	2015100	1304900
A0A087WY55;Q9NP79	Vacuolar protein sorting-associated protein VTA1 homolog	VTA1	0	0	0	0	0	0	0	0	0	0	0	0	0	0	4834000	548420	273950	152930	0	0	340060	261840	0	0	0	0	139010	159180	168200	159830
A0A087WY61;F5H4J1;F5H6Y5;K4DIE0;F5H763;F5H0Z7;F5H2F3;F5H3L6;F5GZW1;F5H1L0;F8W6T3;F5H068;F5H073;F5GWK2;F5H4Y4;F5GWA2;F5H7R5		NUMA1	0	0	0	0	0	0	0	0	0	0	0	0	0	10076000	0	0	68677	44035	0	34162	0	59434	90632	75768	81648	55840	47192	35522	48222	0
A0A087WY71;E9PFW3;Q96CW1;C9JJ47;C9JTK4;C9JGT8;C9JJD3;C9JPV8;H7C4C3	AP-2 complex subunit mu	AP2M1	110720000	98089000	79926000	112490000	117670000	119890000	131460000	250520000	221270000	131700000	115610000	76765000	120130000	121330000	89644000	5770300	5432000	2827400	1516100	1940300	1622400	4032100	8256700	7556800	1369300	926830	771830	1343600	2659400	567390
P61077;A0A087WY85;A0A0A0MQU3;P62837;H9KV45;D6RFM0;D6RAH7;D6RAW0;D6RA11;A0A087WW00;C9J9H9;D6R933;D6R9F6;D6R980;D6RGD0;P51668;Q9Y2X8;D6RIZ3	Ubiquitin-conjugating enzyme E2 D3;Ubiquitin-conjugating enzyme E2 D2	UBE2D3;UBE2D2	55658000	50684000	62858000	73091000	54521000	52942000	57229000	51422000	62343000	51132000	52039000	46360000	46266000	63334000	58181000	20181000	16618000	12847000	6278200	6275400	4702500	8990300	12539000	13372000	6122400	3484500	3190300	4970200	5858800	5762900
A0A087WYN9;Q7Z478	ATP-dependent RNA helicase DHX29	DHX29	12422000	15216000	11721000	16553000	10855000	0	13514000	17283000	24922000	14413000	17659000	16255000	10660000	24523000	15597000	138320	163340	108210	145190	68489	35617	106400	198190	317290	75287	87269	74781	45438	197960	57478
O43399;A0A087WYR3;A0A087WZ51	Tumor protein D54	TPD52L2	32464000	31806000	0	12587000	0	0	16404000	0	0	0	0	0	20134000	15860000	21259000	2364000	1901800	0	294230	199890	348990	1146200	422130	206060	242240	86594	112870	854660	756280	774710
A0A087WYS1;E7EUC7;Q16851;C9JWG0;C9JVG3;C9JQU9;C9JNZ1	UTP--glucose-1-phosphate uridylyltransferase	UGP2	0	0	0	0	0	0	0	0	0	0	0	0	0	0	18351000	368630	224050	185650	174000	0	107490	70016	0	0	0	0	0	249660	195890	260040
A0A087X1F5;A0A087WYV9;A0A087WX56;Q9P0S2;P57105	Cytochrome c oxidase assembly protein COX16 homolog, mitochondrial;Synaptojanin-2-binding protein	SYNJ2BP-COX16;COX16;SYNJ2BP	0	0	0	0	0	0	0	0	0	0	0	0	3695200	0	0	758260	290700	0	0	0	540890	480080	0	0	0	0	0	158880	0	0
A0A087WZ13;E9PAU2;Q8IY67;K7EKR9	Ribonucleoprotein PTB-binding 1	RAVER1	0	0	0	4797100	0	0	5461300	0	6439600	5680200	0	0	5636100	5891400	5374200	0	79873	0	70863	33106	74183	136880	0	173220	99782	0	47952	90536	134110	85170
A0A087WZ62;Q9H6U8;H0YCW6;A0A087WTZ3;A0A087WV58;A0A087WVC0;A0A087WZY8	Alpha-1,2-mannosyltransferase ALG9	ALG9	0	0	0	0	0	0	9222700	14917000	18107000	0	0	0	0	6876200	0	0	0	0	32728	0	44984	191130	350050	416710	0	0	0	0	74731	0
E5RHC7;E5RH59;E5RFW7;E5RFH0;E5RGU4;A0A087WZK9;B3KS98;O15372	Eukaryotic translation initiation factor 3 subunit H	EIF3H	0	0	0	0	0	0	0	0	0	0	0	0	0	0	4860500	2106900	1415700	414410	334540	298450	455530	814120	0	277060	195030	0	187400	820620	767660	642830
A0A087X020;Q9Y3A5	Ribosome maturation protein SBDS	SBDS	8714100	0	6998600	0	0	0	0	0	0	0	0	0	0	0	0	512960	255930	282250	236230	306480	268290	212230	274170	266520	80279	95137	176100	94478	131270	68578
A0A087X054;A0A494C039;Q9Y4L1;E9PJ21;A0A087WWI4;K7EQK2;J3QL06;J3KTF1	Hypoxia up-regulated protein 1	HYOU1	40083000	30386000	24771000	26971000	25471000	25523000	29313000	0	0	20263000	19448000	18642000	44310000	52838000	49807000	996350	775180	151390	243130	197140	226540	579190	225370	49710	148690	50833	116160	464920	704710	389920
Q5T8P6;A0A087X0H9;E2PSN0	RNA-binding protein 26	RBM26	0	0	0	0	0	0	0	14889000	13480000	0	0	0	0	0	0	59120	0	104080	22596	61564	136790	0	301490	283880	0	16431	26863	81195	0	0
A0A087X0K1;Q9Y376	Calcium-binding protein 39	CAB39	1349100	0	0	0	0	0	0	0	0	0	0	0	0	0	0	67457	0	0	0	0	0	0	0	0	0	0	0	0	0	0
A0A087X0K9;G5E9E7;G3V1L9;Q07157;H0YKB1;H0Y3R8;H0YLT6	Tight junction protein ZO-1	TJP1	47236000	27270000	56380000	40695000	49479000	38265000	37166000	44132000	52564000	54969000	0	53233000	36565000	39456000	35962000	563250	358620	408080	238350	282030	217920	276110	258610	459490	261910	75815	234410	107350	162750	126030
A0A087X0Q1;Q7Z739;A0A024R7W5;A0A087WY31;Q9BYJ9;A0A087X0C3;S4R373	YTH domain-containing family protein 3;YTH domain-containing family protein 1	YTHDF3;YTHDF1	0	0	0	0	0	0	0	0	0	0	0	0	0	0	15437000	170910	363030	103370	238160	157780	104440	150090	128850	35509	244410	241050	238110	225240	126370	306230
A0A087X0X3;P52272;M0R019;M0R2T0;M0QY96;M0R2I7;M0QYQ7;M0R0N3;M0QZM1;M0R0Y6	Heterogeneous nuclear ribonucleoprotein M	HNRNPM	237190000	195360000	123630000	113430000	127230000	123620000	159300000	138610000	158670000	88387000	113150000	91488000	218370000	214620000	180000000	5963300	4517700	2138500	980950	898080	1397000	2122800	2673000	2951200	822020	710670	657180	1398700	2421200	1201300
A0A087X1B2;Q53GS9;B9A018;C9JIU2;F8WC91;A0A087WW31;C9J0X5	U4/U6.U5 tri-snRNP-associated protein 2	USP39	45393000	74595000	88845000	102430000	65918000	72211000	55858000	56074000	61227000	79593000	80884000	92037000	31837000	50051000	53164000	2291700	2880700	3339400	1583100	904270	917840	751310	983830	1180900	1487000	1089000	1774700	314360	1238900	750680
A0A087X1Z3;Q9UL46;H0YM70;H0YKU2	Proteasome activator complex subunit 2	PSME2	94703000	74506000	51474000	53871000	47993000	55270000	54375000	0	22852000	32447000	34638000	38023000	100720000	63907000	104070000	8039400	4918000	3256700	1219000	1380400	1561500	2129700	137200	658310	541420	599670	484760	2672500	3028200	2844600
A0A087X253;P63010;A0A087WYD1;A0A087WU93;A0A087WZQ6;K7ERB2;K7EJ01;H7C034	AP-2 complex subunit beta	AP2B1	46392000	37091000	53302000	35128000	24366000	24975000	25162000	18681000	22009000	32820000	27424000	27039000	49388000	47413000	49121000	1063700	861820	648260	509390	239370	189090	512800	308380	485600	347980	183840	268970	607060	794550	446780
F8VYH7;A0A087X256;Q2M389	WASH complex subunit 7	KIAA1033	0	0	4333300	0	0	0	0	0	0	0	0	0	0	0	0	130760	159560	270320	0	0	0	0	0	0	0	0	0	0	0	0
H7BY63;H0YBA5;A0A087X2A7;Q8NB25	Protein FAM184A	FAM184A	0	0	0	0	0	0	0	0	0	0	0	0	0	0	442560000	0	0	4975300	3376900	3944300	5140400	7692500	14135000	11371000	0	0	0	0	3667700	3080600
I3L192;A0A087X2B5;P35613;R4GMX5;A0A087WUV8;R4GN83;A0A2R8YDZ0	Basigin	BSG	41462000	0	0	0	0	0	29930000	0	0	0	0	0	0	0	0	6156300	1058900	194730	0	292500	1092900	1712200	771710	430800	0	116930	160410	2188400	671610	782690
A0A087X2B6;G3V119;H0YB24;Q8N163	Cell cycle and apoptosis regulator protein 2	CCAR2	0	2303300	0	0	0	0	0	0	0	0	0	0	0	0	0	69461	139120	0	0	0	0	0	0	0	0	0	0	0	0	0
A0A087X2D8;O60271	C-Jun-amino-terminal kinase-interacting protein 4	SPAG9	25806000	24212000	27709000	34003000	0	34916000	27372000	0	0	25007000	0	0	30206000	0	0	183630	210360	279340	294850	407560	309950	295840	209400	326450	128170	107490	136760	204770	210570	149830
A0A087X2G1;F1T0B3;Q92499	ATP-dependent RNA helicase DDX1	DDX1	25475000	25949000	16028000	24046000	27519000	23937000	24199000	22877000	26546000	16752000	18705000	20015000	33490000	27623000	30874000	486980	404430	173070	323980	488590	404480	268660	356440	743500	179190	143800	165190	318050	485420	278510
G3V4V5;H0YJP0;A0A087X2H1;Q9ULT8	E3 ubiquitin-protein ligase HECTD1	HECTD1	0	0	0	0	0	0	0	0	0	0	0	0	0	0	3395500	40709	46506	41033	19960	27339	17497	0	0	31994	6456.9	27017	20587	14962	21250	25419
A0A087X2I1;P62333;H0YJE9;H0YJT1;H0YJC0	26S protease regulatory subunit 10B	PSMC6	22192000	15670000	0	0	5689300	0	11802000	0	5829700	0	0	0	0	0	0	735290	465090	107820	18848	82743	92785	484110	313680	365330	0	0	19796	46583	0	46518
A0A0A0MRC0;A0A096LNH0;Q6V1P9	Protocadherin-23	DCHS2	0	0	0	0	0	0	0	0	0	0	0	0	0	0	16068000	0	0	0	1137100	2191300	1927500	2054500	2084100	1861000	382790	558410	148290	111480	0	125010
A0A096LNY6;A0A1B0GWJ0;A0A1B0GTJ7;A0A0A6YY92;P30566;A0A096LP92;A0A096LNT0;A0A096LP76;A0A096LPA2;A0A096LNY5;A0A1B0GTG9;A0A1B0GWF8	Adenylosuccinate lyase	ADSL	11013000	11653000	13006000	0	0	0	0	0	0	0	0	0	17574000	14248000	14353000	862150	617780	597480	136360	100720	0	120450	0	0	0	0	68558	342180	346410	249710
A0A096LP69;P14209	CD99 antigen	CD99	0	0	0	0	0	0	0	0	0	0	0	0	0	0	9660900	1757200	1165400	0	0	0	0	1128300	0	285430	0	0	0	1377000	1570200	958270
A0A0A0MQV6;P09038	Fibroblast growth factor 2	FGF2	0	0	0	18357000	17530000	0	39316000	66765000	47810000	0	0	0	0	0	12802000	678840	608020	262970	594490	1133300	915810	1915200	4649800	3679700	446540	320680	422580	269330	295570	528030
A0A0A0MQW0;A0A0A0MR39;Q9P2K5;A0A087WUT0;A0A087WWC8;H0YN19	Myelin expression factor 2	MYEF2	7405800	0	6370800	0	8673400	0	9922100	0	0	7067800	0	0	0	0	0	229400	32880	154580	79819	162970	17514	285960	30734	45577	98058	0	0	27230	27331	29385
C9JP00;A0A0A0MQX8;Q9NR56;O95205;H7C4T5;B1AKI6;Q9NUK0;Q5VZF2	Muscleblind-like protein 1;Muscleblind-like protein 3;Muscleblind-like protein 2	MBNL1;MBLL;MBNL3;MBNL2	9186900	10741000	0	0	0	0	0	15081000	17452000	0	0	0	0	0	0	1275700	943690	291020	265530	0	460220	949390	731520	989120	122830	74766	117590	540600	361110	367010
A0A0A0MR02;P45880;Q5JSD2;Q5JSD1;A2A3S1	Voltage-dependent anion-selective channel protein 2	VDAC2	327430000	300960000	344480000	461110000	458990000	454680000	457040000	773490000	1163200000	341430000	354160000	461510000	424370000	381520000	376880000	19056000	16778000	13422000	13615000	17476000	17573000	22525000	43415000	65732000	10800000	8554400	12669000	10645000	14901000	10408000
Q5T092;A0A0A0MR06;Q5T091;O15258;Q5T093	Protein RER1	RER1	0	0	0	0	0	0	0	0	0	0	0	0	0	0	7908400	0	783720	0	464790	512100	820820	1301500	2061400	1889900	345720	443630	383580	304670	800000	448250
M0R3F1;A0A0A0MRA5;B7Z4B8;Q9BUJ2;M0QYZ0;M0QYM5;M0QYI8;M0R0K8	Heterogeneous nuclear ribonucleoprotein U-like protein 1	HNRNPUL1	49997000	36237000	0	57564000	30194000	55999000	67446000	156500000	180830000	48616000	49346000	43765000	34496000	39501000	70995000	534250	565320	0	437930	441350	440200	1750300	3623200	3380100	1315100	1002000	881710	897760	799250	984860
Q12791;Q5SVJ8;A0A1W2PNH9;A0A1W2PQ61;H0Y382;A0A1W2PRE5;H0Y379;Q5SVK0;A0A1W2PRX6;A0A1W2PQ93;A0A1W2PP26;B7ZMF5;A0A1W2PRG5;Q5SVJ7;A0A1W2PR56;A0A1W2PPY5;Q5SVK5;A0A0A0MRR0;A0A1W2PRB0;Q5SVJ9;A0A1W2PR62;A0A1W2PPZ1;A0A1W2PRN5;A0A1W2PPX7;A0A1W2PRV4;A0A1W2PSD3;A0A1W2PP94;A0A1W2PPS2;J3KQ16;S4R2X4;A0A1W2PPQ3;A0A0A0MRC3;A0A1W2PQ53;A0A1W2PQJ9;A0A1W2PRA7;D5MRH1;A0A1W2PS97;A0A0A0MSE6;A0A1W2PNG1;A0A1W2PNY7;A0A1W2P…	Calcium-activated potassium channel subunit alpha-1	KCNMA1	0	0	0	0	0	0	0	11349000	10423000	0	8709600	0	0	0	0	0	0	0	29312	0	0	41187	145190	154220	29825	54626	0	0	64446	0
A0A0A0MRE5;Q9ULH1;H0YBF7;H0YBM4;E5RFD9;E5RHD7;A0A286YFG8	Arf-GAP with SH3 domain, ANK repeat and PH domain-containing protein 1	ASAP1	246330000	255300000	616750000	304970000	127620000	118410000	26891000	51845000	46875000	229570000	208360000	159960000	86036000	382570000	165230000	4854500	3925300	8260800	2027400	1887800	929900	332940	611170	547880	1447500	1256300	1608500	404550	2430300	892000
A0A0A0MRI2;Q9UNH7	Sorting nexin-6;Sorting nexin-6, N-terminally processed	SNX6	0	0	0	0	0	0	0	0	0	0	0	0	0	3292300	0	157270	0	0	49784	0	65866	0	0	0	31325	0	16902	0	80153	0
A0A0A0MRM9;Q14978;S4R402;S4R349;S4R3C2	Nucleolar and coiled-body phosphoprotein 1	NOLC1	13511000	10420000	0	7830200	8786000	9831700	6873200	7356900	0	4393500	4594400	6363000	4553000	0	3980100	413580	227150	119120	172390	104350	114640	98567	231770	56860	77315	73664	90278	51780	40414	47131
B7ZLQ5;A0A0A0MRP6;P28370	Probable global transcription activator SNF2L1	SMARCA1	0	0	0	0	0	0	0	0	0	0	0	7068900	0	0	0	0	0	0	0	0	0	0	0	0	0	0	43167	0	0	0
A0A0A0MRR7;P09234	U1 small nuclear ribonucleoprotein C	SNRPC	0	0	0	0	0	0	0	0	0	0	0	0	0	0	9115300	0	0	0	0	0	0	775750	0	0	0	0	0	256400	0	452080
A0A0A0MSA7;A0A0U1RQK7;O43432;Q68DC6;O43439	Eukaryotic translation initiation factor 4 gamma 3	EIF4G3	11728000	18825000	30205000	32715000	16760000	19766000	16325000	10511000	11727000	38343000	39357000	37508000	23638000	44210000	35047000	159300	202970	265990	173600	112140	100680	53011	247490	146760	198430	149770	160980	61499	196850	124530
A0A1W2PQV5;A0A1W2PNM1;A0A0A0MSE2;A0A0D9SFP2;E9PF18;Q16836;A0A1W2PQC2;A0A1W2PRT2;A0A1W2PQ55;A0A1W2PP40;A0A1W2PQ78	Hydroxyacyl-coenzyme A dehydrogenase, mitochondrial	HADH	12366000	8261200	0	0	0	0	0	0	0	0	0	0	0	0	0	1331200	492810	0	60718	0	0	0	0	0	0	0	0	315850	277930	358330
B3KPJ4;A0A0A0MSI2;Q8IXK0;H7C528;Q8NDX5	Polyhomeotic-like protein 2;Polyhomeotic-like protein 3	PHC2;PHC3	0	0	0	10642000	0	0	0	0	0	0	0	0	0	0	0	198050	149970	160850	190290	0	55304	0	69793	106300	0	44669	30583	0	82938	0
A0A0A0MSJ0;Q86XP3	ATP-dependent RNA helicase DDX42	DDX42	0	0	0	0	0	0	0	30469000	30413000	0	0	0	0	0	0	101380	0	0	37791	54425	54438	94492	615380	508540	34555	28919	35463	0	47763	25995
H0YD16;A0A0A0MSK5;Q5JTV8;H0YDU3;J3KN66	Torsin-1A-interacting protein 1	TOR1AIP1	0	0	0	0	0	0	0	0	0	0	0	0	9624900	10255000	9802800	402700	291490	0	79749	126120	0	432530	0	275660	0	0	181470	340220	529380	346710
C9JP03;Q5T6P2;C9JD09;C9JUW9;X6RDJ2;Q5T6P1;X6RGK9;A0A0C4DFN6;A0A0A0MSS3;Q8ND83	SLAIN motif-containing protein 1	SLAIN1	0	0	0	0	0	0	0	0	0	20774000	0	0	0	0	0	4171400	3902400	4830200	1742300	1516000	1567800	374100	609860	1010400	1421600	0	0	0	0	0
S4R3D5;A6NHU4;S4R3Z2;A0A0A0MSS8;Q04828;P42330;P17516	Aldo-keto reductase family 1 member C1;Aldo-keto reductase family 1 member C3;Aldo-keto reductase family 1 member C4	AKR1C3;AKR1C1;AKR1C4	0	0	0	0	0	0	0	0	0	0	0	0	0	30385000	0	0	436640	305850	294360	0	0	330060	272730	0	0	0	518060	807020	1417900	291570
C9JRP1;A0A0A0MST8;E9PFN4;Q9Y6M7;H7C3C4	Anion exchange protein;Sodium bicarbonate cotransporter 3	SLC4A7	0	0	0	8389500	9544000	9346900	0	10888000	11838000	0	0	0	0	0	0	61519	48247	0	54107	93643	116320	45187	183270	118780	59514	0	29697	0	0	0
A0A0A0MSW3;A0A494C1F2;P35658;E9PKD2;B7ZAV2;H0Y837;A0A494BZU9	Nuclear pore complex protein Nup214	NUP214	7091900	7841900	0	0	0	5589500	5047300	4425500	6403600	0	0	0	0	0	4449500	121250	119400	40233	70304	51272	88409	65142	63232	83390	24599	22073	38076	15626	16083	36218
P51532;Q9HBD4;A0A2R8Y4P4;A0A2R8Y7S2;A0A0A0MT49;A0A2R8YGG3;A0A2R8YG32;A0A2R8Y440;A0A2R8Y6N0;A0A2R8Y4C5;A0A2R8YF58;A0A2R8Y7F3;A0A2R8YDA1;A0A2R8Y526;A0A2R8Y7Y7;A0A2R8YF80;A0A2R8Y6V2;A0A2R8YGP5;A0A2R8Y523;A0A2R8Y5K3;A0A2R8YCY3;A0A2R8YFK5;K7EP28;A0A2R8YFV8;K7EQF0;A0A2R8Y4R6;A0A0U1RRG6;A0A0U1RQE1;A0A0U1RRD6;A0A0U1RRF5;B4DNT1;A0A1W2PS06;A0A0U1RRF8;A0A0A0MSS5;A0A2R8Y7R0;F6UH26;A0A0U1RQU0;A0A0U1RR09;F6XE5…	Transcription activator BRG1	SMARCA4	44211000	56657000	79908000	67855000	62425000	57432000	47893000	114420000	103820000	66621000	70472000	87788000	50394000	63834000	45212000	621190	872730	918390	440480	518000	432570	439800	1637700	1493000	524300	465360	412320	124360	335460	103710
E9PMS6;A0A0A0MTE2;E9PMT2;F8WD26;J3KP06;Q8WWI1;E9PMP7;H0Y424;H0YDQ3	LIM domain only protein 7	LMO7	0	0	19107000	0	15313000	0	0	0	0	0	0	0	0	0	0	167700	123090	217770	55032	63884	27618	0	26742	102000	37187	26336	30537	22584	61301	18066
A0A0A0MTH3;Q13418	Integrin-linked protein kinase	ILK	0	0	0	0	0	0	0	7870400	7927800	0	0	0	0	6647800	0	384610	333900	0	0	34340	0	89985	223170	246960	125230	79516	37654	53696	148520	21861
A0A0A0MTH9;O14981	TATA-binding protein-associated factor 172	BTAF1	10941000	10652000	19154000	13073000	0	0	0	0	9130800	12873000	0	0	0	18117000	9705400	130880	54684	286910	86955	2367.6	30868	0	23666	35189	30225	16505	13924	0	124250	21032
A0A0A0MTI6;Q9NYP7	Elongation of very long chain fatty acids protein;Elongation of very long chain fatty acids protein 5	ELOVL5	0	0	0	0	0	0	0	0	0	0	0	0	1150500	0	0	494140	144560	377110	113580	0	0	415890	882430	455180	0	86791	139300	40474	0	0
A0A0R4J2G3;A0A0A0MTJ9;Q6PIU2;H7C046;F8WE33	Neutral cholesterol ester hydrolase 1	NCEH1	97006000	45998000	21206000	0	16494000	29876000	49843000	0	21850000	0	0	9195000	33926000	33536000	29682000	4806200	3133200	507400	0	322830	312070	1035300	107450	337350	110520	0	52020	1151400	816730	567720
Q9Y3B3;A0A0A6YYA0;G3V2Y2	Transmembrane emp24 domain-containing protein 7	TMED7;TMED7-TICAM2	0	0	0	0	0	0	12372000	12663000	0	0	0	0	13305000	0	18621000	2458200	1812900	743520	166370	0	73015	603630	657180	1230700	0	0	0	409170	188500	704460
A0A0A6YYC7;Q96JP5;H3BTR0;H0YCH4;Q9BU19	E3 ubiquitin-protein ligase ZFP91	ZFP91-CNTF;ZFP91	14796000	0	0	27443000	41635000	38696000	44519000	38336000	46527000	68780000	61817000	114030000	0	0	0	301940	283850	0	425610	826300	792090	1153700	1346400	1444100	1076400	874100	1719100	104320	149220	100050
A0A0A6YYI3;A0A0B4J1V8;Q9NQ55;A8MV53;C9J3W3;H7C446;C9JHF7	Suppressor of SWI4 1 homolog	PPAN-P2RY11;PPAN	79264000	87026000	45783000	72847000	109000000	105880000	201760000	172370000	159130000	148000000	147450000	168570000	48595000	47501000	57176000	2290700	3137400	638990	1251400	3013500	2425800	6219900	7209400	5626700	3289000	2643200	3026900	711350	991960	736620
A0A0B4J1Z1;C9JAB2;Q16629	Serine/arginine-rich splicing factor 7	SRSF7	80851000	63014000	0	0	0	41420000	52862000	55606000	54538000	37575000	0	0	125880000	56800000	24464000	8708200	6647900	2266700	744770	1804300	2462000	2684400	4505200	4800600	1964300	1464400	1535000	6183600	4753300	2519700
F5H895;A0A0B4J239;F5GXX5;P61803	Dolichyl-diphosphooligosaccharide--protein glycosyltransferase subunit DAD1	DAD1	27634000	33173000	20153000	0	0	0	42245000	57801000	0	0	0	0	0	31529000	0	14837000	12886000	7423200	2283600	2180600	0	12687000	22907000	12169000	0	0	0	1929300	7380300	2688100
A0A0B4J2A0;Q9UHJ6	Sedoheptulokinase	TRPV1;SHPK	0	0	0	0	0	2638400	0	0	0	0	0	0	0	0	0	144600	150860	179250	75629	79814	63436	0	0	0	0	0	0	0	0	0
Q5W0H4;A0A0B4J2C3;P13693;J3KPG2;E9PJF7;H0YCX0;Q56UQ5	Translationally-controlled tumor protein	TPT1	89091000	58560000	11261000	10522000	13324000	11685000	57240000	12861000	15054000	0	0	0	93633000	53111000	80834000	12869000	6219000	1372600	476940	1265900	696000	5834800	1072100	1637500	313460	579820	370810	5688100	4998500	3474300
A0A0C4DFL7;Q16850;C9IYR8;H7C0D0;A0A3B3ITR4	Lanosterol 14-alpha demethylase	CYP51A1	0	0	0	0	0	0	0	0	0	0	0	0	0	7984700	0	0	0	0	107020	139010	111730	63332	0	0	12502	0	0	62347	171960	0
A0A0C4DFS8;P43490	Nicotinamide phosphoribosyltransferase	NAMPT	0	0	0	0	0	0	0	0	0	0	0	0	0	7088100	0	223390	116900	0	0	0	243510	333190	115220	163860	160970	90165	74746	155800	189000	72298
Q12959;E7EQD7;A0A0C4DFT3;A0A590UKA8;A0A590UJC5;A0A590UJR5;A0A590UJ08;A0A590UJ18;A0A590UJ68;A0A590UJS9;A0A590UJ64;A0A590UJD9;C9JUA9;A0A590UK81;A0A590UJ81;B4E2H8;A0A590UJ25;A0A590UK48;A0A590UJR4;A0A590UJX2;A0A590UJ29;A0A590UK02;A0A590UK70;A0A590UJL2;F2Z2L0;A0A590UJZ4;A0A590UK52;A0A590UJ95;H7C166;A8MUT6;C9JCP6;A0A590UJE6;C9J110	Disks large homolog 1	DLG1	13110000	0	0	0	0	0	0	0	0	0	0	0	0	0	0	354320	139570	105260	0	0	85223	0	0	0	58931	39752	47538	0	76666	0
A0A0C4DFV9;Q01105;A0A087X027;P0DME0	Protein SET	SET	234160000	131540000	0	29033000	34369000	37854000	137100000	32950000	33315000	46075000	27109000	34906000	219010000	80534000	149680000	22854000	13604000	308820	1430600	2529400	1431700	13721000	4296400	1978600	976590	505420	1767300	11544000	3833700	11348000
C9J9K3;A0A0C4DG17;P08865;F8WD59	40S ribosomal protein SA	RPSA	423390000	286990000	34325000	23672000	77637000	85640000	225070000	33143000	67782000	31944000	21868000	32549000	275550000	145700000	246740000	33054000	20799000	1571000	1439600	2022700	2310300	11191000	804520	2746200	765370	430120	880500	9092600	7387900	7310700
Q8NF91;A0A0C4DG40;E7ENN3;A0A5F9ZH86;H0Y325;A0A5F9ZI52;F5GXQ8;A0A5F9ZHR3;H0Y326;A0A087WYJ5;Q5JV20;F5H4Q0;A0A5F9ZHD7;A0A5F9ZHE1;F5GYQ7;A0A5F9ZHB2;A0A5F9ZH87;F8WAI0	Nesprin-1	SYNE1	0	0	0	0	0	0	0	0	0	0	0	0	0	0	237880000	42743	4434.8	16810	4572.2	61924	63890	0	0	3074.2	0	57574	0	61106	66362	269580
F5GYV5;H7BZV4;A0A0C4DG62;F8WCT1;Q66PJ3;F5H7X4;F8WEP2;A0A0C4DH18	ADP-ribosylation factor-like protein 6-interacting protein 4	ARL6IP4	23987000	26036000	27129000	56257000	57192000	58713000	39719000	51935000	38699000	30087000	24044000	27136000	38211000	28184000	30574000	3459200	3693000	2494100	2237600	3976900	4159200	3878700	5826300	2545000	1165400	1153900	1341500	1395100	2498900	1137400
A0A0C4DG89;Q7L014;D6RJA6;H0Y9U3	Probable ATP-dependent RNA helicase DDX46	DDX46	66243000	66670000	61411000	67434000	66857000	58148000	66839000	77199000	68460000	67197000	60786000	70182000	88870000	56964000	59499000	760960	1290400	465840	491640	796980	543170	800560	1515800	1238700	621940	466910	602690	210490	471270	318590
A0A0C4DGA2;O75521;F8WAW4;F8W6J1;F1LLU7;C9JB63	Enoyl-CoA delta isomerase 2, mitochondrial	ECI2	0	0	0	0	0	0	23184000	0	0	0	0	0	0	0	7524400	722670	0	0	236130	0	302390	709320	460320	0	141250	183760	0	220860	0	261770
H7C5K0;A0A0C4DGA6;Q14527	Helicase-like transcription factor	HLTF	0	0	0	0	0	0	0	2194100	3303800	0	0	0	0	0	0	0	0	0	20343	26093	20112	86651	77162	115770	29713	24331	20317	8774.9	29334	13252
A0A0C4DGB1;A0A494C0G7;Q9UNQ2;D6RCL3	Probable dimethyladenosine transferase	DIMT1	12934000	14562000	18758000	14728000	13565000	12108000	17696000	30287000	32943000	13162000	12527000	13415000	0	10805000	8188200	921570	930390	626970	434000	799930	723070	666860	1409000	1932800	433660	217510	341530	0	309820	97091
P20810;A0A0C4DGB5;B7Z574;E7EVY3;E9PCH5;E7ES10;H0Y7F0;E9PDE4;H0Y9H6;E7EQ12;H0YD33;E7EQA0;A0A0A0MR45;F8W7E0;A0A0C4DGD1;E9PSG1;H0Y944;D6RAA8;D6RC54;H0YA91;E7EQK6	Calpastatin	CAST	70896000	53505000	51365000	45152000	44436000	43658000	36206000	0	0	44196000	41666000	45740000	55741000	67621000	37843000	1605400	1044400	1062400	691210	566040	936210	436900	136230	0	517610	612990	755740	573430	821030	540700
A0A0C4DGB6;CON__P02768-1;P02768;A0A087WWT3;H7C013	Serum albumin	ALB	0	0	0	0	0	10379000	25714000	0	9520400	0	0	0	0	0	10807000	0	149490	0	0	0	93390	486910	113060	229940	106610	106830	97530	0	138410	124100
A0A0C4DGG8;Q8IX12;H0YFJ7;F5H1H2;F5H2E6;F5H3E1	Cell division cycle and apoptosis regulator protein 1	CCAR1	0	0	0	0	0	0	0	0	0	0	15252000	0	0	0	0	130810	166940	94138	56818	36835	136210	86860	354570	332860	185520	130620	54495	57004	133270	85399
Q14839;F5GWX5;A0A2R8Y425;A0A2R8Y5J0;A0A2U3TZM0;A0A2R8YFK9;A0A2R8Y212;A0A2R8Y521;A0A0C4DGG9;A0A2R8YFD8;A0A2R8YDJ9;A0A2R8YD40;A0A2R8YDW2;A0A2R8Y4X2;A0A2R8Y445;A0A2R8Y8C1;A0A2R8YER1;A0A2R8Y5Z7;A0A2R8Y685;A0A2R8Y7I0;A0A2R8Y7M9;A0A2R8Y5M9;A0A2R8Y8B3;A0A2R8YE38;F5H6N4;A0A2R8Y6G9;A0A2R8Y7X1;K7ESA5;F6T542;K7EPV1	Chromodomain-helicase-DNA-binding protein 4	CHD4	492080000	513750000	670110000	573890000	614260000	660270000	376790000	810810000	660610000	506960000	559620000	643670000	623360000	606680000	515720000	6090800	5710600	5789200	2861400	3108400	4036200	2423300	7449700	5975900	2062300	1903100	2312400	2240800	3310700	1856900
O75390;B4DJV2;A0A0C4DGI3;H0YIC4;F8W1S4;H0YH82;F8VPA1;F8VPF9;F8VRI6;F8VZK9;F8VR34;F8VTT8;F8W4S1;F8VX68;F8VRP1;F8VX07;F8W642	Citrate synthase, mitochondrial;Citrate synthase	CS	0	0	0	0	0	0	0	0	0	0	0	0	111890000	66485000	100510000	3400800	2802500	447180	182570	0	145900	695800	187900	273110	175840	51159	82750	2331900	1917500	2074400
A0A0C4DGQ5;P04632;K7ELJ7;A0A075B7C0;U3KQE2;K7EM73;K7EIV0;K7EKD8;U3KPR7;K7ES78;Q96L46;K7EMQ1	Calpain small subunit 1	CAPNS1	172460000	217560000	137610000	163520000	160010000	188280000	150070000	134010000	142110000	111460000	107190000	150350000	172370000	152940000	178680000	16422000	19508000	7467400	5558100	4425300	9503000	8959500	5832300	8535700	3426600	2698300	4896300	7075800	7696000	6165900
P39656;A0A0C4DGS1;U3KQ84	Dolichyl-diphosphooligosaccharide--protein glycosyltransferase 48 kDa subunit	DDOST	625070000	619330000	510520000	1596000000	879520000	1051900000	901080000	1182000000	1218900000	493760000	534430000	553030000	371090000	557170000	479260000	2369100	2657800	518190	12216000	25702000	28003000	57737000	82409000	92302000	1045300	765980	779170	1095500	1886300	1604800
Q5QPR4;A0A0D9SEI3;Q5QPR3;A0A0D9SER5;A0A0D9SEN2;Q9UQ88;P21127	Cyclin-dependent kinase 11A;Cyclin-dependent kinase 11B	CDK11A;CDK11B	0	0	0	0	28295000	25484000	30331000	37247000	31410000	0	0	31292000	0	0	0	83365	97524	46708	142770	320880	322370	466490	664300	554830	86535	174020	264520	142360	157280	97786
A0A0D9SEM9		DDX39A	0	0	0	0	0	0	0	0	0	0	0	0	0	0	14737000	0	765400	0	531830	590860	781870	0	0	0	629810	427250	458920	1116700	965830	974540
B4DLR2;A0A0D9SEN1;Q12884	Prolyl endopeptidase FAP;Antiplasmin-cleaving enzyme FAP, soluble form	FAP	7186200	0	0	0	0	0	0	0	0	0	0	0	0	0	0	179660	86852	0	0	0	0	0	0	0	14346	0	9458	53116	47267	39141
A0A0D9SEY1;O95819;E7EN19;G5E948;H7C360;G3XAA2;E7ENQ1;H7C3Z6;C9J338;H7C0P6;A0A0D9SG62;E7EX83;C9J840;A0A590UJE1;I3L2I2;Q8N4C8;Q9UKE5	Mitogen-activated protein kinase kinase kinase kinase 4;Misshapen-like kinase 1;TRAF2 and NCK-interacting protein kinase	MAP4K4;TNIK;MINK1	0	0	0	0	0	0	0	0	43862000	25381000	0	0	0	0	0	0	0	0	34916	168700	48999	38373	60603	505270	156050	0	0	15160	19560	0
A0A0D9SG12;A0A2R8YFS5;O00571;A0A2R8YF78;A0A0D9SF53;A0A0D9SFB3;A0A2R8Y4A4;A0A2R8Y645;A0A2R8YFR4;A0A2R8Y5G6;A0A2R8YCW1;A0A2U3TZJ9;F6S8Q4;A0A2R8YDT5;A0A2R8Y7T2;A0A2R8YDH3;O15523;A0A0J9YVQ7;A0A087WVZ1;A0A2R8Y650;A0A2R8YCU0;C9J081;Q9NQI0;D6RCM4;C9J8G5;A0A087WX09;A0A2R8YF89;H0Y960;A0A2R8Y770	ATP-dependent RNA helicase DDX3X;ATP-dependent RNA helicase DDX3Y	DDX3X;DDX3Y	350400000	320190000	380290000	367390000	349990000	359480000	358500000	473530000	520000000	375440000	388720000	475780000	374610000	483180000	389310000	9392900	7908200	6314800	3985400	4534000	4833500	5715300	10172000	11505000	3521700	3191300	4277700	4093900	4828600	2933200
A0A0D9SF70;G5E9L0;Q8N6H7;E9PQP3;E9PIY6;E9PMU9;H0YDN9;E9PMR9;B0QYV9;E9PM63;E9PNY8;H0YDX1;B0QYV8;E9PJT7;E9PK28;E9PN48	ADP-ribosylation factor GTPase-activating protein 2	ARFGAP2	11587000	13059000	48862000	14288000	0	16343000	0	0	0	0	0	0	16731000	26066000	14292000	565410	576520	783800	242690	92221	288380	177780	0	0	418440	0	0	222630	890870	531040
Q92614;A0A0D9SFK2;H0YEV9	Unconventional myosin-XVIIIa	MYO18A	0	0	0	19929000	16289000	20275000	13580000	0	15165000	38280000	39249000	25239000	0	29121000	22381000	293760	345230	47445	59799	130000	102150	64038	88826	41122	174840	80124	161000	16647	73385	99898
H7BY36;A0A0D9SFL3;B0QYK0;C9JGE3;Q01844	RNA-binding protein EWS	EWSR1	0	0	0	0	0	0	0	0	0	0	0	0	0	0	41763000	1926200	1590400	322990	325240	248420	461480	1275700	785920	720510	160850	341180	422440	953720	1001900	1183600
Q5JRC6;A0A0D9SGE8;Q8IWS0	PHD finger protein 6	PHF6	0	0	0	0	0	0	29772000	54952000	38304000	0	0	0	0	0	0	251040	153710	0	0	0	0	509470	2220900	1996400	0	48157	0	0	0	0
H9KV28;A0A2R8Y5N1;A0A140T8Z0;A0A0G2JH68;O60610	Protein diaphanous homolog 1	DIAPH1	31634000	38327000	68479000	72011000	28053000	50784000	31196000	42302000	49777000	48414000	40121000	60861000	26596000	50185000	25081000	223510	490310	814710	462180	208590	392800	284790	696160	663730	414210	368070	432640	78445	558000	135180
A0A0G2JHC2;Q6NYC8	Phostensin	PPP1R18	14474000	0	0	0	0	19741000	0	0	0	0	22194000	0	0	0	0	494140	200930	0	211530	256300	299710	283220	213940	286310	116950	317520	200310	243100	142510	240580
A0A0G2JIW1;P0DMV9;P0DMV8;V9GZ37	Heat shock 70 kDa protein 1B;Heat shock 70 kDa protein 1A	HSPA1B;HSPA1A	142760000	133430000	126450000	119340000	112380000	142160000	95134000	70779000	79891000	107880000	91124000	95163000	158800000	153710000	164570000	4214500	3680900	2146900	1714300	1717500	2320000	1573800	1319900	1456200	1739100	1035900	1401900	1430900	3351900	2047500
A0A140T9L0;A0A0G2JJL1			0	0	0	0	0	0	0	0	4649000	0	0	0	0	0	0	0	0	0	0	0	164240	0	341720	251310	0	0	0	0	0	0
C9K0U8;A0A0G2JLD8;E7EUY5;Q04837	Single-stranded DNA-binding protein, mitochondrial	SSBP1	0	0	0	0	0	0	0	0	0	0	0	0	0	0	3999700	749110	0	0	0	315940	0	922490	0	383840	0	0	0	364950	0	226700
CON__Q9BYQ8;A0A0G2JLF9;Q9BYQ8;A0A087X0S9;A0A087WX21;G5E9R7	Keratin-associated protein 4-9	KRTAP4-9	0	0	0	0	0	0	0	0	0	0	0	0	0	0	129530000	0	0	0	0	0	0	0	0	0	0	0	0	0	0	3212100
A0A0G2JMS7;A0A0G2JNZ2;A0A0G2JPP5;Q14160	Protein scribble homolog	SCRIB	0	0	16298000	13682000	0	0	0	0	13319000	13927000	13556000	14432000	12519000	16949000	15541000	132950	145900	148250	40922	16643	23054	0	21384	60994	80582	75246	108620	38979	191620	93381
Q8MH48;Q5RJ85;A0A0G2JPQ3;P17693	HLA class I histocompatibility antigen, alpha chain G	HLA-G	0	0	0	0	0	0	10490000	0	0	0	0	0	0	0	0	841470	577570	0	150280	143870	0	324460	0	0	0	0	0	0	0	0
A0A0G2JRV3;G5E975;Q12824;A0A0U1RQQ2;A0A0U1RRB8;B5MCL5;A0A2R8YEE8;A0A0G2JSE9;C9JTA6;A0A2R8Y5N5	SWI/SNF-related matrix-associated actin-dependent regulator of chromatin subfamily B member 1	SMARCB1	0	0	0	0	0	0	0	0	0	0	0	0	0	0	0	0	0	0	0	0	0	0	0	0	0	0	0	0	0	0
E9PMU7;E9PN18;A0A0J9YVR6;E9PQ56;A0A0J9YWM1;H0YEM1;A0A0J9YYL3;A0A0J9YXJ8;A0A0J9YVP6;A0A0J9YXX5;Q9UHX1;E9PL19	Poly(U)-binding-splicing factor PUF60	PUF60	10391000	10227000	0	0	0	0	0	0	0	0	0	0	0	0	0	739600	664220	0	151620	178460	212350	197610	334160	343160	0	0	100630	152560	188650	164460
A0A0J9YWF7;A0A1B0GUY0;A0A1B0GV49;A0A1B0GTY9;A0A1B0GTJ4;A0A1B0GUA1;A0A1B0GTG2;A0A1B0GW82;A0A1B0GW77;P49419	Alpha-aminoadipic semialdehyde dehydrogenase	ALDH7A1	0	3386100	0	0	0	0	0	0	0	0	0	0	0	0	0	442430	204520	0	0	0	0	0	0	0	0	0	0	0	0	0
A0A0M3HER1;A0A0J9YXC7;P48059	LIM and senescent cell antigen-like-containing domain protein 1	LIMS1	0	0	0	0	0	0	0	0	0	0	0	0	0	0	5661800	1182300	886130	461640	0	482530	0	567530	0	0	0	0	0	203820	0	204220
H0Y8D1;A6XMV8;CON__P07477;A0A0J9YYC8;E7EQ64;A6XMV9;Q8NHM4;P07478;P07477	Putative trypsin-6;Trypsin-2;Trypsin-1;Alpha-trypsin chain 1;Alpha-trypsin chain 2	PRSS1;PRSS3P2;PRSS2	640810000	387670000	568110000	1987700000	2803100000	2367100000	1697900000	1981900000	1492400000	3846900000	3137200000	1668000000	0	706290000	1758000000	37451000	39029000	41902000	138890000	171670000	189840000	134400000	165190000	152930000	284350000	218870000	177110000	127340000	134390000	127770000
A0A0M3HER2			0	0	0	0	0	0	0	0	7836900	0	0	0	0	0	0	0	0	0	0	0	0	827020	1197300	917880	0	0	0	0	0	0
P43243;A8MXP9;A0A0R4J2E8;D6REM6;D6R991;B3KM87;H0Y8T4;D6RE02;Q68E03;D6RIA2;D6RBI2;D6RB45;A0A1B0GX04;D6R8Z5;D6REK4;D6RCM3;D6RBS2;D6RAY2;D6RAM9;D6R9F3;D6RBK5	Matrin-3	MATR3	107450000	91430000	52136000	47467000	47857000	53106000	60450000	59031000	81029000	53670000	47294000	66898000	107660000	109980000	108750000	2599900	2188100	579930	556030	422880	852520	675730	662540	1265500	661300	455010	775340	1214400	2089100	1531900
A0A0S2Z4G6;P09493;H0YKP3;A0A494C0V8;A0A087WTJ7	Tropomyosin alpha-1 chain	TPM1	116740000	95359000	0	37702000	38221000	40837000	95789000	41528000	33818000	16888000	0	0	75744000	37906000	46529000	8456100	5585700	0	813170	1312300	1096900	3995100	908070	1068600	300570	58548	0	1735500	1750100	1413800
A0A0U1RQF0;P49327;J3KTF0;A0A0U1RRG3	Fatty acid synthase;[Acyl-carrier-protein] S-acetyltransferase;[Acyl-carrier-protein] S-malonyltransferase;3-oxoacyl-[acyl-carrier-protein] synthase;3-oxoacyl-[acyl-carrier-protein] reductase;3-hydroxyacyl-[acyl-carrier-protein] dehydratase;Enoyl-[acyl-carrier-protein] reductase;Oleoyl-[acyl-carrier-protein] hydrolase	FASN	163620000	145270000	158600000	129300000	102300000	87738000	64878000	71588000	61515000	84223000	93235000	90741000	177760000	164840000	176690000	1973300	1398400	1297500	587140	265960	345240	225210	290260	335690	334380	254980	256500	345680	519730	333990
A0A0U1RQQ4;Q9UNN8	Endothelial protein C receptor	PROCR	0	0	0	0	0	0	0	0	0	0	0	0	0	0	6040600	0	0	0	0	0	0	0	0	0	0	0	0	0	111620	239670
A0A0U1RQV4;Q13464	Rho-associated protein kinase 1	ROCK1	7137300	0	0	9576500	0	9953400	8356300	9345400	13303000	0	0	0	0	0	0	90193	49753	60697	57750	20173	72877	76110	112100	161110	22938	22095	0	11155	0	0
A0A0U1RR22;Q9UNF0;H0Y923;B0QYG7;B0QYG8	Protein kinase C and casein kinase substrate in neurons protein 2	PACSIN2	24575000	0	0	39862000	34384000	37441000	0	0	0	28074000	30258000	38451000	0	0	0	1056300	869460	1345400	1121800	932340	864400	281710	0	0	479500	441990	568090	0	86075	0
A0A0U1RR32;A0A0U1RRH7;Q99878;Q96KK5;Q6FI13;P20671;P0C0S8;Q9BTM1;Q16777;H0YFX9;A0A3B3IS11	Histone H2A type 1-J;Histone H2A type 1-H;Histone H2A type 2-A;Histone H2A type 1-D;Histone H2A type 1;Histone H2A.J;Histone H2A type 2-C;Histone H2A	HIST1H2AJ;HIST1H2AH;HIST2H2AA3;HIST1H2AD;HIST1H2AG;H2AFJ;HIST2H2AC	6607100000	14384000000	10584000000	2234700000	4174900000	5136300000	4812700000	4817500000	6292700000	7056400000	5215500000	9330300000	9737200000	10772000000	10494000000	791270000	1604000000	889670000	119560000	263210000	295340000	421500000	454960000	650520000	335720000	217170000	483380000	460100000	708160000	465920000
A0A0U1RRF2;B5MC64;A0A0U1RR64;A0A0U1RRD2;F8WD83;A0A0U1RR76;A6NJ78	Probable methyltransferase-like protein 15	METTL15	0	0	0	0	0	0	0	0	0	0	0	0	0	0	3777300	572990	572540	416060	0	0	0	0	0	424160	0	0	0	0	729440	299740
A0A0U1RR85;Q6NUK4	Receptor expression-enhancing protein 3	REEP3	13290000	15210000	21528000	15474000	0	0	0	0	0	0	0	0	0	0	0	1685200	1997500	2020300	1037800	462270	629560	432440	488420	861920	648120	407890	0	0	0	0
J3QT38;A0A0U1RRB6;Q9Y2D4	Exocyst complex component 6B	EXOC6B	0	0	14565000	0	0	0	0	0	8888600	0	0	0	0	11724000	0	44874	308490	275170	42766	24021	70923	115290	214980	206160	36405	29194	33497	16736	129550	38484
B4DG57;A0A0U1RRH6;O94880	PHD finger protein 14	PHF14	0	0	0	0	35464000	0	0	69902000	0	0	25961000	0	0	29163000	0	286940	143580	94170	312430	669350	671480	950690	1461900	1513600	385790	331070	116380	271370	558390	104460
A0A0U1RRM1;Q8WXI9;A0A0U1RRK3;A0A0U1RR34;A0A1B0GW07;A0A0U1RR30	Transcriptional repressor p66-beta	GATAD2B	10462000	10555000	15361000	9677200	0	11481000	0	13765000	12299000	0	0	10342000	0	0	12556000	463540	217970	446170	114340	47720	198750	103530	417030	303560	35823	0	104600	68786	117420	178450
A6NLN1;A0A0U1RRM4;P26599;A0A0D9SF20;K7EKJ7;K7EK45;A0A087WU68;K7ES59;K7ELW5;O95758;A0A087WUW5;X6R242	Polypyrimidine tract-binding protein 1	PTBP1	186470000	170830000	80309000	80114000	81138000	82463000	110090000	44055000	68596000	59329000	40099000	64890000	237210000	143330000	216380000	11694000	6281400	1817400	1656200	1608100	2835900	4044800	1696000	2815500	1269400	604510	1179800	4697300	4108000	5690100
A0A140T955;A0A140T933;A0A1W2PRT9;A0A140T9I0;A0A140T9X5;A0A140T913;A0A1W2PPQ2			23406000	0	0	0	0	16679000	0	9441300	0	0	12379000	13684000	0	20129000	20073000	1094600	395760	212650	435600	188030	475700	142720	320020	167880	128210	214170	222520	0	525580	433630
P10321;O19617;A0A140T9U8;A0A140T9H5;A2AEA2;A0A140T921;A0A140T9B3;A0A140T9J9;A0A140T962;A0A1W2PR11;A0A140T9E1;A0A140T942;A0A140T9L3;A0A1W2PRU9;A0A140TA05;A0A1W2PRX1;A0A1W2PP77;A0A140TA12;A0A140T9T1;A0A140T9Z7;A0A140T9W2;A0A140T9U0;F8W9Z8;A0A140T9M0;P13747;A2BF26;A0A0G2JIF0;A0A0G2JH50;A0A1W2PS56;A0A1W2PNZ7;A0A140TA03	HLA class I histocompatibility antigen, Cw-7 alpha chain	HLA-C	51487000	38779000	24826000	0	40082000	38439000	38865000	20861000	25309000	33977000	34815000	26939000	80883000	42931000	69632000	2330400	2054900	1080400	359680	1165200	1270400	1152100	736050	1048300	813660	696410	594440	1906700	1630300	1652200
A0A140TA64;Q9BYR0	Keratin-associated protein 4-7	KRTAP4-7	0	0	0	0	0	0	0	0	0	0	0	0	0	0	50367000	0	0	0	0	0	0	0	0	0	0	0	0	0	0	1332300
A0A140TA67;A8MVA2	Keratin-associated protein 9-6	KRTAP9-6	0	0	0	0	0	0	0	0	0	0	0	0	0	0	65950000	0	0	0	0	0	0	0	0	0	0	0	0	0	0	6541600
A0A140TA69			7025200	0	0	0	0	0	0	0	0	0	0	0	0	8892400	663850000	464140	257290	0	16415	0	0	0	114980	0	0	0	75288	29990	293170	10396000
A0A1B0GUC3;A0A1B0GV98;A0A1B0GTC5;A0A1B0GU26;A0A1B0GTC3;A0A1B0GVH5;Q9C0B1;A0A1B0GTZ8;X6R3I0;A0A1B0GUY7;A0A1B0GTI3;A0A1B0GTY1	Alpha-ketoglutarate-dependent dioxygenase FTO	FTO	2579100	0	0	0	0	0	0	0	0	0	0	0	0	0	0	99196	0	11107	0	0	0	0	0	0	0	0	0	0	43396	21864
A0A1B0GTL5;Q9BXF6	Rab11 family-interacting protein 5	RAB11FIP5	0	0	0	71575000	116860000	127500000	39986000	99398000	45475000	57658000	0	69164000	0	0	0	0	54641	114770	466130	744980	739840	218550	3945600	278000	453790	90246	115980	43048	40709	87940
A0A1B0GTU4;P49023;F5GZ78;A0A1B0GU60;F5H836;A0A1B0GV30	Paxillin	PXN	72660000	29042000	61128000	70456000	59344000	60764000	35822000	16223000	15943000	58563000	45794000	60383000	31814000	36720000	41710000	1788900	1256000	1402700	557490	542200	841150	351250	134940	117730	439900	152400	514850	198950	380830	124030
A0A3B3IT83;A0A3B3IS03;A0A3B3IRV6;A0A3B3ISF1;A0A3B3IU51;A0A3B3ISZ5;A0A3B3IRI3;A0A3B3ITE1;A0A1B0GTW1;A0A2R8YDH4;Q9UDY2	Tight junction protein ZO-2	TJP2	0	0	0	0	0	0	0	0	0	0	0	5709200	0	0	0	0	0	0	0	0	0	0	0	96874	77231	0	53709	0	0	0
A0A1B0GW44;A0A1B0GVD5;A0A1B0GWE8;P07339;A0A1B0GV23;A0A1B0GVP3;A0A1B0GU92;A0A1B0GU03;H7C469;C9JH19;F8WD96;H7C1V0;F8W787;A0A1B0GVF1;A0A1B0GV01	Cathepsin D;Cathepsin D light chain;Cathepsin D heavy chain	CTSD	175400000	120510000	32457000	40775000	62274000	88649000	194070000	53000000	47367000	83928000	51439000	57304000	353820000	148430000	277250000	6870900	7941200	1334900	748770	1302700	2296000	6278700	1436100	1644800	2263200	1432100	1695800	7507700	4857900	6090500
H0Y5R6;A0A494C0S8;Q5T446;A0A494BZY8;A0A1B0GVN9;A0A1B0GVZ4;A0A494C0Q8;A0A494C085;P06132	Uroporphyrinogen decarboxylase	UROD	0	0	0	0	0	0	0	0	0	0	0	0	0	0	6955000	633440	411930	0	37710	0	0	101440	0	0	0	0	0	262270	260610	250860
A0A1B0GW05;Q2PZI1;H7C3M5	Probable C-mannosyltransferase DPY19L1	DPY19L1	0	0	0	0	0	11724000	15022000	29434000	31897000	10042000	11218000	13820000	0	0	0	78509	94957	54331	39629	61721	112530	467420	756130	895870	79282	81085	119310	0	106660	0
H7C0E3;A0A1B0GW36;Q9H0J4	Glutamine-rich protein 2	QRICH2	0	0	0	0	0	0	0	0	20013000	0	0	0	0	0	0	363070	587910	0	339790	327290	375780	0	483470	562550	0	0	0	0	0	0
A0A1C7CYX9;Q16555;E5RFU4	Dihydropyrimidinase-related protein 2	DPYSL2	343060000	263230000	277680000	281100000	257600000	282290000	209530000	100700000	129210000	205320000	162470000	216960000	316600000	201000000	276070000	10576000	6451000	4385600	3338100	3547300	3521700	3316700	1387400	1560500	1982500	1221100	1798400	3445700	2800900	2685900
Q9BWM7;A0A1P0AYU5;S4R3N9	Sideroflexin-3	SFXN3	49077000	45571000	26135000	20478000	0	23399000	0	0	0	0	0	0	31805000	32417000	35364000	2692600	2613400	408410	299770	285640	621040	265490	392830	459880	82314	270120	101550	550180	1233900	577570
Q969N2;A0A1W2PNW9;A0A1W2PPR6;A0A1W2PPS0;A0A1W2PPC3;A0A1W2PP57;A0A1W2PR92;A0A1W2PRZ8;A0A1W2PRV7;A0A1W2PRH2;A0A1W2PPI8;A0A1W2PPU8;A0A1W2PQ29;A0A1W2PRG1;A0A1W2PRH8;A0A1W2PNP0;H7C2Y2;A0A1W2PR70;A0A1W2PQL3;A0A1W2PQN1;A0A1W2PP98;A0A1W2PP13;A0A1W2PPQ7;A0A1W2PNS2;A0A1W2PNZ5;A0A1W2PP03;B7Z7C5;A0A1W2PR22;A0A1W2PP91	GPI transamidase component PIG-T	PIGT	0	0	0	0	0	0	0	0	16467000	0	0	0	0	0	0	0	0	0	0	0	0	67678	121040	399040	14905	63804	32412	0	0	30793
A0A1W2PNR9;Q9Y5U9	Immediate early response 3-interacting protein 1	IER3IP1	0	0	0	0	0	0	0	0	0	0	0	0	0	0	8391400	2855000	4321300	2436400	2670800	1772300	1123900	5770700	8563800	6621300	2080400	1713800	1515000	1019100	3241800	1109800
A0A1W2PNV4;E9PF58;F8WFD3		ARPC1A	72673000	55649000	28366000	32743000	30675000	44325000	75548000	40276000	0	30711000	28974000	16581000	49155000	29654000	56704000	2648500	2356600	706730	258640	382600	644280	992020	535230	173730	326360	110720	98373	809270	498410	963630
A0A1W2PNX8;Q9H3U1	Protein unc-45 homolog A	UNC45A	7548300	6548700	16445000	0	0	0	0	0	0	0	0	0	0	0	0	121930	85632	206700	42707	100760	0	0	0	0	24076	16864	27642	0	66809	0
A0A1W2PPC6;Q9H3H5;F8W681;A0A1W2PQD1;F8WE55;A0A1W2PRR6;A0A1W2PQH0	UDP-N-acetylglucosamine--dolichyl-phosphate N-acetylglucosaminephosphotransferase	DPAGT1	0	0	7453600	8225200	0	0	0	39115000	33249000	6648100	6578000	0	0	0	0	356540	211140	319510	639990	183250	0	0	2864000	2787800	205100	231300	132460	105260	65103	0
A0A1W2PPR8;P01889;A0A140TA21;F6U0H7;A0A140T9D4;A0A140T951;A0A140TA02;A0A140T9S9;A0A140T9H3;A0A140T9G0;A0A140T9A9;A0A1W2PNR7	HLA class I histocompatibility antigen, B-7 alpha chain	HLA-B	28482000	0	0	0	0	0	0	0	0	0	0	0	29574000	30497000	46098000	661220	269850	196660	365330	0	633020	211170	0	385730	464580	471930	526590	794190	1045100	1150900
A0A1W2PPX5;A0A1W2PQR6;A0A1W2PQB7;A0A1W2PS43;Q14108;A0A1W2PSE4;A0A1W2PPU6;A0A1W2PRS1;D6RDG0;A0A1W2PS70;A0A1W2PNX7;A0A1W2PRF6	Lysosome membrane protein 2	SCARB2	13926000	0	0	0	0	0	13890000	0	0	0	0	0	20176000	19550000	17086000	461560	165520	0	0	0	42836	368330	0	0	0	7867.3	0	416980	531820	236170
A0A1W2PQ43;E9PK09;E9PQN2;E9PKI6;E9PK91;Q9NYF8;E9PJA7;H0YF00	Bcl-2-associated transcription factor 1	BCLAF1	0	0	0	0	0	0	0	0	0	0	0	0	26823000	23902000	36400000	133570	55759	50266	106660	61873	121230	86223	335570	140950	143700	75407	118210	433670	456990	423560
A0A1X7SBZ2;A0A5H1ZRQ2;A0A1W2PQ51;Q92841;A0A0U1RQJ0	Probable ATP-dependent RNA helicase DDX17	DDX17	103740000	95070000	70745000	74356000	72865000	86689000	125110000	97692000	129960000	83263000	83285000	89081000	111490000	76649000	95780000	2951700	2795000	1406400	684120	769020	1182700	1746100	1941600	2832700	772210	727310	772850	1030200	1353600	1189700
O15056;A0A1W2PR85;E7ER60	Synaptojanin-2	SYNJ2	0	0	0	0	0	0	8020400	14020000	15490000	7980400	0	0	0	0	0	0	0	67960	0	0	0	66857	159170	177530	41727	0	10009	0	15542	16555
A0A1W2PRV5;E7EQZ4;Q16637;H0YBZ9;A0A0G2JRX5;A0A0G2JRY6;B4DP61	Survival motor neuron protein	SMN1;SMN2	0	0	0	0	0	11013000	0	34110000	26556000	0	0	0	0	9972700	0	804600	705420	0	0	812870	1004300	0	3233400	2488700	498180	0	685260	0	850000	0
A0A286YF22;O43175;A0A2C9F2M7;A0A286YFL2;A0A286YFA2;A0A286YFM8;A0A286YF78;A0A286YER3;A0A286YFC8;A0A286YFB2;A0A286YF34;A0A286YFE1;A0A286YFF3;A0A286YFK5	D-3-phosphoglycerate dehydrogenase	PHGDH	162110000	143830000	85432000	121020000	114530000	122740000	106790000	65647000	95747000	66622000	67606000	81486000	104150000	92276000	96786000	9133000	5387900	2824100	2261600	2363100	1548900	3315700	1590600	2198100	1058100	915910	986040	2224600	2307000	1531200
E9PIA8;A0A2C9F2P4;A0A286YFF7;P50897;E9PSE5;E9PK48;Q5T0S4;A0A286YFE3;A0A286YFL8	Palmitoyl-protein thioesterase 1	PPT1	5737700	0	0	0	0	0	0	0	0	0	0	0	0	0	0	819670	0	0	0	0	0	0	0	0	0	0	0	355250	0	252750
A6NNI4;A0A2R8Y478;G8JLH6;P21926;A0A087WU13	Tetraspanin;CD9 antigen	CD9	0	0	0	0	0	0	20765000	0	39472000	0	23614000	0	0	0	0	889500	831900	0	0	0	0	2686500	2088400	6414600	271400	1130300	0	0	0	0
A0A2R8Y4L2			0	0	0	0	0	0	0	0	0	0	0	0	0	0	118410000	0	0	0	0	0	0	0	0	0	0	0	0	0	0	2936400
E9PGF5;E9PF55;A0A494C067;A0A2R8Y4T1;Q9HBL0;A0A087WWW7;H0Y4U1;C9JFT7;C9JI43;C9J8K5;E7EMG1;E7ERH1	Tensin-1	TNS1	0	34919000	0	55695000	52039000	58602000	0	0	0	0	70957000	0	0	0	0	33735	173830	54315	133990	270950	474950	16705	0	445740	45202	431930	22771	0	0	0
A0A2R8Y4Z0;Q14004;A0A2R8Y7W5;A0A2R8YF61;A0A087X209;A0A2R8YD28;A0A2R8YEB7;A0A2R8Y644;Q9BVE2;J3QSD7;Q9NYV4;A0A2R8Y7Y0;A0A2R8YCQ1	Cyclin-dependent kinase 13	CDK13	33255000	38487000	24899000	26244000	30187000	50099000	51351000	53976000	44459000	86676000	74119000	64220000	38331000	32367000	33833000	265820	478590	137590	280760	362010	430760	740270	887400	742740	370110	339650	288560	71016	254730	73375
A0A2R8Y804;A0A2R8Y543;A0A2R8Y5C3;A0A2R8Y750;A0A2R8Y5Z1;B4DGU4;A0A2R8YCH5;A0A2R8Y7Z0;A0A2R8Y5A3;P35222;A0A2R8Y6G0;A0A2R8Y815;C9IZ65;A0A2R8YG06	Catenin beta-1	CTNNB1	50800000	48479000	62342000	43405000	30732000	29499000	16023000	15821000	16185000	36187000	43604000	37357000	23696000	35249000	37489000	1096300	1001400	956210	371790	263160	295420	363350	192810	189750	437340	359860	353500	202400	587820	412840
A0A2R8Y566;Q9P260;A0A075B785;A0A075B768	LisH domain and HEAT repeat-containing protein KIAA1468	KIAA1468	20385000	20804000	55443000	47300000	23182000	23726000	0	0	0	22806000	31346000	0	29219000	38122000	35816000	229900	167170	641510	481240	176010	182550	48269	0	23153	140210	190490	20237	179620	595510	167350
A0A2R8Y595;A0A2R8YFL0;P49711;V9GY73;Q8NI51;A0A2R8Y6Z6;A0A2R8Y6C1;F5H2V8	Transcriptional repressor CTCF	CTCF	786260000	934700000	229970000	462590000	663720000	689720000	488850000	373160000	263580000	539590000	352950000	619770000	868620000	679440000	998260000	35844000	38815000	5886400	8585500	12972000	15019000	11439000	10544000	7471300	9016000	4530900	8395000	14047000	15964000	15400000
Q99700;F8WB06;A0A5F9ZHW5;A0A5F9ZHX3;A0A2R8Y5A6;A0A2R8Y7E6;A0A5F9ZI57;V9GY86;F8VQP2;A0A5F9ZHH4;A0A2R8YDM9;A0A2R8Y7P6;H0YH87;F8W0B5;A0A5F9ZH85;F8VRK6;F8WB05	Ataxin-2	ATXN2	34583000	37192000	35802000	0	27309000	20703000	32385000	125630000	100550000	41544000	31857000	0	24688000	38550000	0	843820	750620	537420	171900	212830	200190	726350	2045900	2197300	276580	106640	77294	103040	99407	76095
A0A2R8YFL4;A0A2R8Y6Q1;A0A2R8Y7E7;A0A2R8YHI9;A0A2R8Y5Q8;Q15813;A0A2R8Y897;A0A2R8Y6L2;A0A2R8Y4E7;A0A2R8Y784;A0A2R8YER9;A0A2R8Y4V6;A0A2R8Y809;A0A2U3TZJ6	Tubulin-specific chaperone E	TBCE	0	0	5722400	0	0	0	0	0	0	0	0	0	0	0	0	209350	166500	163610	0	0	0	0	0	0	0	0	0	0	0	0
A0A2R8Y7S8;A0A2R8YFH0;E9PHA6;A0A2R8Y6P0;A0A2R8YG02;P43246	DNA mismatch repair protein Msh2	MSH2	0	0	351440	0	0	0	0	0	0	0	0	0	0	0	0	107530	85304	7779.5	0	0	0	0	0	0	0	0	0	0	0	0
A0A2R8YCT7;A0A2R8Y6X2;Q8TEA8	D-tyrosyl-tRNA(Tyr) deacylase 1	DTD1	0	0	0	0	0	0	0	0	0	0	0	0	0	0	7423900	1780500	1507700	1037200	675380	494090	460380	0	642850	685760	0	404640	0	511070	799640	490920
A0A2R8YDQ9;A0A2R8Y6Y7;Q9P2R7;Q5T9Q8;Q5T9Q5	Succinyl-CoA ligase [ADP-forming] subunit beta, mitochondrial	SUCLA2	16901000	17034000	20775000	0	0	0	0	0	0	0	0	0	0	0	0	703770	643090	594240	60930	0	137000	0	145620	0	0	0	0	0	0	0
F5GXF5;E7ETD6;E9PE19;A0A2R8Y7Q1;Q12830;A0A0A0MR81	Nucleosome-remodeling factor subunit BPTF	BPTF	0	0	0	0	0	0	0	28966000	18613000	0	0	0	0	0	0	72063	72283	68757	15551	14688	0	0	175320	95955	19727	0	18179	0	0	0
P62263;A0A2R8Y811;E5RH77	40S ribosomal protein S14	RPS14	375620000	397500000	320330000	432120000	472930000	433130000	890370000	1067200000	1080600000	513740000	507270000	645470000	433700000	456500000	460000000	100890000	98115000	55804000	47120000	54444000	40625000	155630000	196380000	210160000	54899000	40671000	53890000	25704000	64816000	42784000
E7ETK0;A0A2R8Y849;A0A2R8YD14;P62847;A0A2R8Y8A0	40S ribosomal protein S24	RPS24	2002300000	1640000000	1453500000	1084000000	1207700000	1258300000	1342300000	1698000000	1386900000	1556400000	1453000000	1403300000	1055900000	873960000	801160000	288160000	221650000	156260000	96008000	113970000	126320000	145030000	214890000	189710000	110810000	85875000	81523000	74615000	84206000	45912000
A0A2R8Y851;P62273	40S ribosomal protein S29	RPS29	0	0	0	0	0	0	0	0	0	0	0	0	0	0	21068000	3461400	2737300	974220	0	0	0	2466300	3551700	0	756780	488580	0	0	0	2089800
F8VZI0;A0A2R8Y891;P08237;F8VSF7;F8VTQ3;F8VW30;F8VUB8;F8VYK8;F8VX13;F8VZQ1;F8VP00	ATP-dependent 6-phosphofructokinase, muscle type	PFKM	13242000	13614000	0	0	0	0	0	0	0	0	0	0	0	0	0	460640	421680	1433500	51499	1192000	0	0	0	0	0	630050	0	2303100	0	1974700
A0A2R8YGD1;A0A2R8YD45;O14773;A0A2R8Y7U1;A0A2R8YDY1;A0A2R8Y7I4	Tripeptidyl-peptidase 1	TPP1	19142000	17956000	0	0	0	0	20843000	0	0	11480000	0	0	39350000	24723000	28622000	778380	733740	0	0	0	346160	681800	137820	252430	164410	0	66406	817590	946770	837980
A0A2R8YDT8;A0A2R8YF45;E7ER27;A0A2R8YD50;E7EWE5;P51659	Peroxisomal multifunctional enzyme type 2;(3R)-hydroxyacyl-CoA dehydrogenase;Enoyl-CoA hydratase 2	HSD17B4	7207800	0	0	0	0	0	0	0	0	0	0	0	15646000	0	9440900	583600	0	0	0	0	0	90336	0	0	0	0	0	517500	73617	402700
A0A2R8YGH5;H7C1E4;P61966;F6SFB5;A0A5F9ZI43;H7BZG6;H0Y673;A0A5F9ZHX2;A6NH01;A0A5F9ZHW1;P56377	AP-1 complex subunit sigma-1A;AP-1 complex subunit sigma-2	AP1S1;AP1S2	0	6383400	0	0	0	0	0	0	0	0	0	0	0	0	0	138060	578340	0	164580	233660	365600	259330	423190	0	0	0	111390	0	127050	107690
E9PNW4;A0A2U3TZL5;P13987;H0YET2	CD59 glycoprotein	CD59	110210000	75681000	0	0	0	0	131210000	0	0	0	73287000	0	100730000	65748000	121610000	26026000	17260000	1214100	0	522640	1423100	17659000	707130	2563000	1574100	2146700	768420	9312800	8388200	6650500
P06744;A0A2U3TZU2;K7EQ48;A0A2R8Y6C7;A0A0J9YYH3;A0A0J9YX90;A0A0J9YXP8;CON__Q3ZBD7;K7ENA0;K7EPY4;K7EIL4;K7ERC6;A0A0J9YXM3;K7EP41;K7ELR7;A0A2R8YF08;K7ERK8;A0A0J9YXH9;A0A0J9YYI8	Glucose-6-phosphate isomerase	GPI	93752000	90433000	0	0	19919000	23735000	63518000	34774000	23264000	0	0	25348000	83958000	42596000	80399000	2896600	1948600	0	150840	286210	1020000	2254900	1507900	260850	65986	0	153570	2001000	568090	744150
M0R2C2;A0A384DVU0;Q8IY17	Neuropathy target esterase	PNPLA6	0	0	0	0	0	0	0	0	0	0	0	0	0	0	4323300	99009	61540	63838	0	0	0	72367	106640	0	0	165100	154170	161660	196100	122520
V9GYY3;A0A384N5Y3;F5H2F4;P11586;V9GZ78;A0A494C1T2	C-1-tetrahydrofolate synthase, cytoplasmic;Methylenetetrahydrofolate dehydrogenase;Methenyltetrahydrofolate cyclohydrolase;Formyltetrahydrofolate synthetase;C-1-tetrahydrofolate synthase, cytoplasmic, N-terminally processed	MTHFD1	191820000	246420000	163360000	68752000	59626000	33753000	62920000	26564000	38742000	71979000	73617000	77434000	84309000	103840000	93803000	4530100	4675800	2596300	500580	409270	248990	592380	346900	484070	474140	408820	543920	618360	1029200	509410
B4E1E0;A0A3B3IRI2;P17812;A0A3B3ITB8;A0A3B3IRQ8;A0A3B3ITF6	CTP synthase;CTP synthase 1	CTPS1	0	10658000	10420000	0	0	0	0	0	0	0	0	0	0	0	0	275220	381140	289880	164610	54513	61902	71337	44926	75384	26086	23099	37192	0	55208	36369
A0A3B3IRW2;A0A3B3IRK6;Q13724	Mannosyl-oligosaccharide glucosidase	MOGS	0	0	0	0	0	0	0	0	0	0	0	0	0	0	4290100	0	0	0	31041	40071	0	73212	199910	227440	0	0	16740	0	41344	58695
C9J3L8;C9J5W0;A0A3B3IRT8;E9PAL7;C9IZQ1;P43307	Translocon-associated protein subunit alpha	SSR1	0	4971300	0	0	0	0	0	0	0	0	0	0	0	0	0	514040	409450	0	0	199990	206080	544680	331250	236760	153970	0	77015	269390	283700	269800
A0A3B3IS71;P06400	Retinoblastoma-associated protein	RB1	0	0	0	0	0	0	0	0	12485000	0	0	0	0	0	0	144320	260460	135680	65062	88022	80944	59626	256040	179060	0	0	0	0	0	0
B4DKB2;A0A3B3ISF9;P42892	Endothelin-converting enzyme 1	ECE1	0	0	0	0	0	4799300	0	0	0	0	0	0	0	0	0	100650	0	0	31864	32312	60581	0	0	0	0	0	0	0	0	65245
A0A3B3ISU0;Q02487	Desmocollin-2	DSC2	0	0	0	0	0	0	0	0	36446000	0	0	0	0	0	0	0	0	0	0	0	0	535920	577180	692220	0	0	0	0	0	0
E5RG31;A0A3B3ITP6;A0A3B3IU45;A0A3B3IT92;P33991;A0A3B3IS57	DNA replication licensing factor MCM4	MCM4	0	0	1156200	0	0	0	0	0	0	0	0	0	0	0	0	47055	30875	22668	0	0	94090	0	0	0	82374	0	0	0	133040	78301
A0A3B3ITT5;P47914;F8WF43;C9IYI4	60S ribosomal protein L29	RPL29	955990000	1238800000	829120000	836280000	1521400000	1802200000	3739300000	2808300000	2492000000	2794400000	2972200000	2700400000	861540000	657440000	701870000	168000000	201040000	93678000	70250000	169210000	166760000	449830000	414780000	338850000	244010000	203010000	202090000	61005000	67491000	53991000
A0A3B3ITW3;P28288	ATP-binding cassette sub-family D member 3	ABCD3	14930000	18350000	0	22888000	25053000	21569000	23442000	23075000	40201000	26597000	25937000	26683000	17675000	26508000	19447000	164840	185850	48398	162920	305430	283180	344210	605050	905150	295510	213860	325430	106790	390490	136700
E9PN17;A0A3B3ITX4;O75964;A0A3B3IRW3	ATP synthase subunit g, mitochondrial	ATP5L	70989000	89999000	65746000	54773000	46494000	57958000	50534000	57464000	77245000	56406000	50608000	52496000	59872000	73754000	79367000	19045000	21863000	12598000	6131700	3594700	5395500	8820800	11345000	14484000	2745900	3913900	4644700	6219200	13414000	7341700
A0A3B3ITZ9;Q9Y2W1	Thyroid hormone receptor-associated protein 3	THRAP3	27829000	23574000	15470000	18877000	18997000	17276000	43049000	109620000	92503000	18501000	15299000	23416000	42327000	21249000	45694000	539780	170660	108390	230100	132450	140660	841780	1856000	1760400	138630	74572	127580	517280	678530	401970
B1AHD1;A0A3B3IUA2;P55769;A0A3B3IRU2;A0A3B3ISH1	NHP2-like protein 1;NHP2-like protein 1, N-terminally processed	NHP2L1	0	0	0	22136000	22723000	23076000	23459000	23358000	24930000	20874000	0	12266000	24356000	26027000	28396000	3588800	2508300	1971600	1015500	1192500	1354600	1720700	1979100	2200500	901300	407990	640600	1169300	1946300	1739300
A0A3B3IUA7;Q14258	E3 ubiquitin/ISG15 ligase TRIM25	TRIM25	13527000	15143000	16540000	12624000	12703000	13456000	14803000	14192000	19975000	11231000	0	11787000	0	17163000	20255000	609490	1118100	509720	269780	242600	479130	462480	504420	603620	120750	70554	112720	295800	298270	422750
Q14690;A0A3B3IUD7;S4R3Q4	Protein RRP5 homolog	PDCD11	93244000	117180000	198440000	123610000	122250000	113180000	78641000	156780000	161400000	131950000	146640000	151320000	44862000	107930000	77061000	968140	1196400	1863000	592970	578390	320190	235580	1242300	1240900	677100	607330	607630	144830	503010	252040
A0A3F2YNY6;O75400;H0YG38;F5H578;H7C2N3	Pre-mRNA-processing factor 40 homolog A	PRPF40A	12259000	11001000	9654600	13663000	15219000	16490000	0	36492000	31085000	12088000	13471000	11284000	0	12885000	0	403440	498680	93166	104140	246200	225680	103450	721800	659960	86576	34572	55251	299090	412750	242390
J3KSW8;A0A494BZV2;Q6WCQ1;H0Y2S9;H0Y7E2;J3QRL2;H7C3G6	Myosin phosphatase Rho-interacting protein	MPRIP	20102000	19855000	23907000	36430000	43841000	34905000	0	30123000	34806000	40182000	32843000	37077000	0	0	0	177640	85061	221450	359360	292400	520150	57511	568430	436200	383250	244880	253760	38027	261300	0
H0Y993;A0A494C028;P35659;B4DFG0;H0Y8X0;D6RDA2;A0A494C198;D6R9L5	Protein DEK	DEK	119930000	150830000	141590000	192850000	229990000	234150000	184040000	304530000	291620000	189060000	186870000	216020000	86106000	91010000	114420000	4749000	6150100	5812000	4073100	5181200	5852500	6571100	10740000	11420000	4079100	3367200	3197000	726430	2280200	2223600
A0A494C0D1;P53597	Succinyl-CoA ligase [ADP/GDP-forming] subunit alpha, mitochondrial	SUCLG1	0	0	0	0	0	0	0	0	4763500	0	0	0	0	0	0	596210	0	0	0	0	0	0	0	304320	0	0	0	0	0	0
A0A494C0J7;Q08188	Protein-glutamine gamma-glutamyltransferase E;Protein-glutamine gamma-glutamyltransferase E 50 kDa catalytic chain;Protein-glutamine gamma-glutamyltransferase E 27 kDa non-catalytic chain	TGM3	0	0	0	0	0	0	0	0	0	0	0	0	0	0	18287000	37076	248500	112930	0	69837	0	0	0	40021	106500	116170	0	0	248520	181390
K7EK42;A0A494C0X0;Q99426;K7EP07;K7EQH0;K7ER04;K7EL99	Tubulin-folding cofactor B	TBCB	1228800	0	0	0	0	0	0	0	0	0	0	0	0	0	0	122880	0	0	231950	0	0	0	0	0	0	0	0	0	0	0
H0YFD2;F8WFC1;A0A494C108;Q8N9T8	Protein KRI1 homolog	KRI1	0	0	0	0	0	0	0	0	0	0	0	0	0	0	0	0	0	0	0	0	0	0	0	0	0	0	0	0	0	0
J3KQ69;A0A499FHX9;P25205;Q7Z6P5	DNA replication licensing factor MCM3	MCM3	0	1220100	0	0	0	0	0	0	0	0	0	0	0	0	0	38212	23030	0	0	0	0	0	0	0	0	0	0	25050	32508	19847
A0A499FI31;Q15020;A0A494C0L2;F8W667;F8VVK9;H0YHU8;F8VZM2	Squamous cell carcinoma antigen recognized by T-cells 3	SART3	23850000	23113000	20932000	16698000	21827000	16240000	16875000	223130000	117680000	37048000	0	19588000	13683000	20438000	28211000	398980	434510	302090	157370	240590	202320	249740	2196100	1688700	284520	68722	166790	193370	300450	207200
A0A499FI48;P13667	Protein disulfide-isomerase A4	PDIA4	45624000	38759000	0	28953000	29058000	34742000	53366000	0	30203000	0	0	0	0	22600000	34455000	950740	897030	46661	258290	303200	384160	698850	99577	429780	26232	19594	145480	267520	800910	471700
O75592;A0A499FJI4;H7C3U4	E3 ubiquitin-protein ligase MYCBP2	MYCBP2	0	5106600	15364000	5195500	0	0	0	0	0	0	0	0	0	6501800	6159600	0	11245	65379	5551.5	5881.8	0	0	0	5520.2	0	46129	3184.1	0	21015	6785.2
A0A590UJ10;A6NGQ3;Q5VST9	Obscurin	OBSCN	0	0	0	0	0	0	0	0	0	0	0	41546000	0	0	0	0	0	0	208080	253840	273050	204930	240360	279090	77656	0	96409	0	0	0
U3KPX3;A0A590UJ43;P48729;A0A590UJQ7;E5RG27;U3KQ83;D6RGE5;A0A590UK94;D6REM4;A0A5F9W493;Q8N752	Casein kinase I isoform alpha;Casein kinase I isoform alpha-like	CSNK1A1;CSNK1A1L	9409300	9014700	10482000	0	0	0	0	13463000	10969000	0	0	0	0	0	0	426350	363480	345940	86813	68903	0	0	430550	335990	78680	43509	59742	0	118750	43247
D6RHU2;A0A590UJA4;A0A590UKC7;D6RAI5;A0A590UJM2;A0A590UK29;A0A590UK15;Q13423	NAD(P) transhydrogenase, mitochondrial	NNT	0	0	0	0	0	0	0	0	0	0	0	0	0	5925800	0	314240	0	250350	108050	123610	90354	0	0	0	0	0	129920	209620	255250	0
A0A590UJK4;A0A590UK01;A0A590UJP7;A0A590UK80;Q13247	Serine/arginine-rich splicing factor 6	SRSF6	42893000	34375000	25535000	19696000	26027000	26881000	47712000	49410000	36460000	32449000	23575000	38754000	104860000	49866000	84870000	2608800	1086200	429360	692810	1112100	1328600	2272800	2790200	2515100	562540	645920	1170100	4007800	2961300	3531700
A0A590UJS4;Q6KC79	Nipped-B-like protein	NIPBL	5191100	5193000	11845000	0	0	0	0	0	0	0	0	0	0	0	0	38330	35042	71169	0	0	0	0	0	0	0	0	0	0	0	0
A0A5F9ZHL1;P24752;A0A5F9ZHD4;A0A5F9ZHJ7;A0A5F9ZI66;A0A5F9ZHJ0;A0A5F9ZHL7;E9PRQ6;A0A5F9ZHH9	Acetyl-CoA acetyltransferase, mitochondrial	ACAT1	0	0	0	0	0	0	0	0	0	0	0	0	12642000	8113500	11752000	370290	285330	0	35569	0	0	0	0	58657	0	0	0	219330	194140	198330
A0A5F9ZHM4;P07195;A0A3B3IS95;A8MW50;C9J7H8;F5H793	L-lactate dehydrogenase B chain;L-lactate dehydrogenase	LDHB	1833700000	1669600000	1622900000	1161400000	814910000	781320000	792110000	419550000	525680000	1151400000	1222300000	856130000	1394300000	1268700000	1450100000	116020000	86641000	67083000	30200000	24085000	19533000	28759000	17135000	19749000	28111000	26013000	17019000	29865000	40292000	33855000
E7EN32;A0A5F9ZHS3;O00255;A0A5F9ZI68;E7EPR4;E7ET29	Menin	MEN1	0	0	0	0	0	0	0	0	0	0	0	0	0	8413900	0	0	0	51229	0	0	0	0	0	0	0	0	0	0	162460	0
V9GYM8;A0A5F9ZI21;Q92974;V9GZ14;Q5VY93;V9GYF5;V9GYG5;V9GYF0	Rho guanine nucleotide exchange factor 2	ARHGEF2	10233000	0	0	10786000	13113000	10944000	0	16614000	16477000	16135000	15904000	18078000	0	0	0	136810	228790	0	93271	70620	53836	0	132990	258900	115300	127150	121940	13882	13756	19011
A0A5H1ZRS1;Q15154;H0YBA1;A0A4W8VX11;E7EV93	Pericentriolar material 1 protein	PCM1	0	0	0	18860000	15182000	15822000	0	0	14759000	24272000	17482000	16418000	0	0	0	95012	73973	103960	122350	155540	178070	125080	17041	133520	36973	29134	23630	6294.2	0	15354
F8WC54;A0AVL1;Q13443	Disintegrin and metalloproteinase domain-containing protein 9	ADAM9	0	0	0	19528000	15747000	16417000	16405000	15646000	0	19243000	17777000	24579000	0	0	0	0	0	0	306360	285390	259750	270250	185550	65077	231860	240560	342590	0	0	0
A0AVT1;H0Y8S8	Ubiquitin-like modifier-activating enzyme 6	UBA6	0	0	0	0	0	10366000	0	0	0	0	0	0	0	0	0	85021	63821	36392	78565	42499	93462	19244	0	21002	0	15244	20320	26418	0	17991
A2A274;Q99798	Aconitate hydratase, mitochondrial	ACO2	20115000	20394000	16480000	15519000	0	12391000	0	0	0	0	0	0	19365000	0	0	606900	395970	236370	225720	39465	133340	114700	0	0	0	0	0	213650	39366	32521
A2A2D0;P16949;E5RIR6;E7EVN3;Q9H169	Stathmin	STMN1	424530000	339350000	18573000	26715000	58743000	46465000	236300000	49871000	65114000	43154000	25260000	31134000	287380000	167940000	190160000	72865000	49725000	3728900	3176100	5963800	3849700	23818000	6182200	5709500	1807300	756530	1400600	18719000	15325000	15015000
A2A2V2;P42696;Q5TCT4;H7C5M1	RNA-binding protein 34	RBM34	82384000	109140000	89465000	72522000	123500000	98787000	124090000	106910000	97730000	79914000	103520000	78995000	63626000	60210000	65132000	2008000	1834400	1337700	254990	880510	812260	1221400	935440	838110	12550000	1320400	1166600	198270	261380	326020
A2A3R5	40S ribosomal protein S6	RPS6	0	0	0	0	0	0	0	0	0	0	0	0	0	0	0	0	0	0	0	0	0	0	0	0	0	0	0	0	0	0
A5YKK6;H3BR89;H3BMH0;H3BMZ2;H3BVC9	CCR4-NOT transcription complex subunit 1	CNOT1	0	11612000	19607000	19855000	12533000	6932200	0	0	0	15449000	17742000	17115000	13091000	16166000	15523000	82542	160740	76293	70272	28420	12945	0	4363.2	3641.3	49472	81700	60110	23948	93564	19382
A6NCN2	Putative keratin-87 protein	KRT87P	0	0	0	0	0	0	0	0	0	0	0	0	0	738520000	45617000	0	0	0	34767	0	0	102810	143600	0	0	0	0	0	31925000	904700
P51610;A6NEM2;H7C1C4	Host cell factor 1;HCF N-terminal chain 1;HCF N-terminal chain 2;HCF N-terminal chain 3;HCF N-terminal chain 4;HCF N-terminal chain 5;HCF N-terminal chain 6;HCF C-terminal chain 1;HCF C-terminal chain 2;HCF C-terminal chain 3;HCF C-terminal chain 4;HCF C-terminal chain 5;HCF C-terminal chain 6	HCFC1	13734000	16909000	26543000	0	0	0	0	0	0	0	0	0	0	0	0	135220	201210	278040	150440	148950	143790	0	388470	421300	0	0	0	0	204110	29116
B1AK81;A6NEM5;Q92643	GPI-anchor transamidase	PIGK	0	0	0	0	0	0	0	0	0	0	0	0	0	0	1739300	280860	177180	112650	0	0	0	197860	384080	228350	0	20775	0	0	0	49291
K7EIJ0;K7ENL2;A6NG10;K7EMC9;Q969T9;K7EIN1;K7ESN4;K7EIK1	WW domain-binding protein 2	WBP2	12166000	0	0	0	13916000	0	0	0	0	0	13711000	14602000	0	0	0	1967800	496430	0	0	703630	0	0	0	0	237330	518080	612520	257640	0	0
H3BMT0;H3BTV5;H3BU16;A6NGP5;H3BMV3;Q9H910;H3BMM8;B4E1P3	Hematological and neurological expressed 1-like protein	HN1L	25371000	16568000	0	0	0	0	17949000	0	0	0	0	0	0	0	12538000	3320900	1928700	460940	0	606640	733470	2289600	348520	665830	377220	238000	270900	237690	260020	474450
A6NHQ2	rRNA/tRNA 2-O-methyltransferase fibrillarin-like protein 1	FBLL1	47047000	68822000	99048000	0	0	0	0	136580000	119150000	0	98581000	0	0	0	0	3549400	3887400	2448600	149530	179450	276020	0	4891900	4585800	228230	1727100	221140	1095800	0	1247100
J3KTL8;A6NHR9	Structural maintenance of chromosomes flexible hinge domain-containing protein 1	SMCHD1	0	0	0	0	0	0	0	0	0	0	0	0	0	0	0	0	0	0	0	0	0	0	0	0	0	0	0	0	0	0
A6NI33;Q75T13	GPI inositol-deacylase	PGAP1	0	0	0	0	0	0	0	0	0	0	0	0	0	0	60441000	346790	2036200	1238600	910820	1324300	1176100	1759500	3358000	2750100	661560	626870	901150	4776300	5242500	2956000
A6NIZ0;Q9NXR1;Q9GZM8;I3L3G9;I3L2S8;I3L2R3;I3L2T8;J3KRK9;I3L533;J3QL85;I3L2R9;I3L522;J3QSD2;J3QRZ1	Nuclear distribution protein nudE homolog 1;Nuclear distribution protein nudE-like 1	NDEL1;NDE1	0	0	0	0	0	0	0	10534000	20216000	0	0	0	0	0	0	0	0	0	0	0	0	391400	449570	686320	0	0	243220	189670	0	0
A6NJA2;P54578;J3QQT6;J3KS55	Ubiquitin carboxyl-terminal hydrolase;Ubiquitin carboxyl-terminal hydrolase 14	USP14	11788000	9592500	0	8687000	0	0	10281000	0	0	0	0	0	11371000	0	12732000	710300	533620	36383	61020	87752	138780	261130	96177	143430	0	0	34727	138510	145000	181630
A6NJD9;A8MVT4;A8MYK1;Q16540;H7C2P7	39S ribosomal protein L23, mitochondrial	MRPL23	0	0	0	0	0	0	25081000	46839000	45864000	22522000	25116000	21566000	17271000	0	0	581450	490100	252040	318340	272550	0	1380700	2838200	2863500	585950	539760	673550	667660	382790	194780
A6NKB8;Q9H4A4;A0A087WU27;A0A087WUS4;C9JMZ3	Aminopeptidase B	RNPEP	12947000	13126000	7552100	8622000	0	8475600	0	0	0	0	0	0	0	8849100	0	416560	430860	228360	101020	24672	116000	34928	0	35171	65734	0	0	45975	123990	43202
E9PJK1;E9PRJ8;H0YDL9;H0YDJ9;E9PIF1;A6NMH8;P60033;E9PM31;H0YEE2	Tetraspanin;CD81 antigen	CD81	0	13855000	20159000	39130000	24928000	30408000	61112000	81872000	90308000	22671000	14972000	25930000	0	17963000	0	1097300	2422900	2692600	3194700	1658000	3575400	7565800	11753000	12600000	2743200	2119900	3328000	269340	2170100	515220
A6NML8;K4DI95;C9J6U3;O60879	Protein diaphanous homolog 2	DIAPH2	0	9537600	19913000	0	0	0	0	0	0	11864000	0	0	0	0	0	7439	58798	298220	67197	52606	50904	0	59097	212090	109050	25105	98762	0	57806	13799
Q99829;B0QZ18;F2Z2V0;A6PVH9;Q5JX60;E7ENH5;Q5JX45;Q5JX52;Q5JX44;Q5JX61;Q5JX59;Q5JX58;Q5JX56;Q5JX54;Q5JX55;E7EV27;Q5JX57;Q5JX53	Copine-1	CPNE1	25478000	16482000	0	0	0	0	0	0	0	0	0	0	0	0	0	1330100	906910	150710	96648	42146	145320	64203	0	0	0	0	0	111240	78508	93519
A6PVJ6;A6PVJ7;Q5JWR1;H0Y4S7;B4DML5;G3XAG9;Q9BYM8	RanBP-type and C3HC4-type zinc finger-containing protein 1	RBCK1	0	0	0	0	0	0	0	0	0	0	0	0	0	0	112580000	10247000	10655000	8628600	5340200	0	8129800	9576300	18858000	21289000	4810000	5540800	6156200	552400	7628000	5583500
A6PVN8;C9IZ76;A6PVN6;Q5T949;Q5T948;A6PVN9;F6WIT2;A6PVN5;Q15257;A6PVN7	Serine/threonine-protein phosphatase 2A activator	PPP2R4	7573900	0	0	0	0	0	0	0	0	0	0	0	0	0	0	1082000	492170	0	0	0	0	0	0	0	0	0	0	241470	229450	216310
A7XZE4;CON__Q3SX28;A0A2R8Y6A3		TPM2b	271870000	189800000	0	38305000	88494000	83756000	276970000	63119000	53244000	39704000	33396000	48772000	121900000	75006000	88207000	13175000	8728800	59925	1398700	3007100	3760000	11273000	3026000	2154800	785950	617330	653290	3569400	2369700	2799400
A8CG34;A6NF01;Q96HA1;C9JFL1	Nuclear envelope pore membrane protein POM 121C;Putative nuclear envelope pore membrane protein POM 121B;Nuclear envelope pore membrane protein POM 121	POM121C;POM121B;POM121	0	0	0	17234000	14117000	12962000	0	19642000	14364000	0	0	12209000	0	0	0	105420	76794	123930	197090	180240	229830	87254	466960	304790	0	0	79499	0	0	0
A8K968;A0A0A0MRA8;A0A0A0MSA4;Q9Y2J2;A0A0J9YY18;A0A1B0GTF8;A0A0J9YW31;A0A0J9YWN0;A0A0J9YWE1;A0A0J9YWS4;J3QS83;A0A0J9YW26	Band 4.1-like protein 3;Band 4.1-like protein 3, N-terminally processed	EPB41L3	0	0	0	16940000	19571000	19348000	22240000	33796000	33778000	17782000	18189000	18680000	0	21945000	31021000	322010	272180	117300	130660	168610	266190	362780	636030	699420	156690	159800	159480	68727	168800	256040
Q5TIG5;A8MQ02;J3KN01;P55196;H0Y7R8;H0YA98;F8W9I4;E9PFY5	Afadin	MLLT4	12037000	15342000	34163000	23623000	16633000	0	0	0	10444000	13075000	15517000	13544000	0	15768000	15264000	161360	228750	303180	117360	144520	12474	31552	11918	32998	31246	33453	27694	8414.3	98552	96707
A8MUH2;P18859	ATP synthase-coupling factor 6, mitochondrial	ATP5J	0	0	0	0	0	0	0	0	0	0	0	0	0	0	39030000	2210400	2428000	0	0	0	0	689370	0	0	0	0	0	2175900	2127600	2212200
A8MUX0	Keratin-associated protein 16-1	KRTAP16-1	0	0	0	0	0	0	0	0	0	0	0	0	0	0	7049700	0	0	0	0	0	0	0	0	0	0	0	0	0	0	199790
Q49AN9;F5H013;P62308;A8MWD9;C9JVQ0	Small nuclear ribonucleoprotein G;Putative small nuclear ribonucleoprotein G-like protein 15	SNRPG;SNRPGP15	72460000	27815000	13787000	0	0	12835000	17192000	11045000	0	0	7123400	0	17643000	0	0	22866000	16270000	3865400	1391100	2559600	3430800	7272600	2703600	2830200	1645600	949830	1993200	7085600	5904700	6270900
A8MX49;P49593	Protein phosphatase 1F	PPM1F	1179700	0	0	0	0	0	0	0	0	0	0	0	0	0	0	69393	0	0	0	0	0	0	0	0	0	0	0	0	0	0
A8MXP8;Q14257	Reticulocalbin-2	RCN2	0	0	0	0	0	0	0	0	0	0	0	0	0	0	6847300	509700	251020	0	576160	1097700	952610	822950	1192500	0	441160	175700	273340	369930	378940	528980
A9JX13;Q9UGU0	Transcription factor 20	TCF20	0	0	0	0	0	0	0	4155400	0	0	0	0	0	0	0	0	0	0	0	0	0	207760	242570	0	0	0	0	0	0	0
A9Z1X7;Q8IYB3;E9PCT1;M0R088;M0R1E7;M0QXG5	Serine/arginine repetitive matrix protein 1	SRRM1	43958000	48802000	29420000	44127000	59925000	72917000	44524000	98813000	56239000	24899000	28986000	0	30529000	27934000	26000000	854390	831800	453760	576460	717300	1119800	836810	1750500	857560	178990	267100	57118	170710	234040	150280
B0QY89;Q9Y262;B0QY90;C9JHP4;C9K0Q7;H7C3A0	Eukaryotic translation initiation factor 3 subunit L	EIF3L	79212000	56631000	60774000	49632000	39110000	50890000	29347000	0	30500000	41273000	33714000	48776000	102150000	93501000	62100000	3447000	1935000	2586700	768090	642670	595910	288960	100760	256720	441590	230190	606240	946420	1497700	1052900
B0QYW5;F6RTR7;F8WE74;O43808	Peroxisomal membrane protein PMP34	SLC25A17	0	0	0	0	0	0	0	0	5064200	0	0	0	0	0	0	0	0	0	0	0	0	163510	306550	323530	0	0	0	0	0	0
B1AH87;P30536	Translocator protein	TSPO	74372000	70093000	110220000	132020000	76087000	45774000	131810000	195870000	257970000	97946000	124790000	102030000	0	101130000	0	12818000	11979000	10630000	12967000	8863600	6410300	12468000	24485000	27486000	6916000	7254300	3589900	658210	6699200	1387800
B1AK87;B1AK88;P47756;B1AK85	F-actin-capping protein subunit beta	CAPZB	118920000	88094000	81749000	99863000	98092000	90947000	92039000	49445000	63766000	63374000	78992000	69851000	98729000	89841000	124270000	8566100	6350100	3865900	2879000	3371700	4216200	4302800	2555900	3274200	2207600	1308400	1111400	2019700	2783300	2112600
B1AKR6;Q9NP97;H3BQI1;Q8TF09	Dynein light chain roadblock-type 1;Dynein light chain roadblock-type 2	DYNLRB1;DYNLRB2	24529000	17619000	0	0	0	0	0	0	0	0	0	0	19901000	0	0	2959700	2091900	0	0	0	0	0	0	0	0	0	0	962620	267130	503180
B1ALA9;P60891;A0A2R8Y7H4;B7ZB02	Ribose-phosphate pyrophosphokinase 1	PRPS1	47902000	43966000	37822000	22518000	17249000	15342000	19172000	22660000	18838000	32328000	27584000	19881000	18244000	31821000	39540000	2879100	2219900	1942400	433090	237580	441260	795060	375770	482790	409910	389260	398460	684980	1824100	1180300
B1AMN7;Q9P2B4	CTTNBP2 N-terminal-like protein	CTTNBP2NL	51373000	0	0	0	0	0	0	0	0	0	0	0	0	0	0	3021900	0	3124500	0	0	0	0	0	0	61001	0	0	0	0	0
B1AN99;P35030	Trypsin-3	PRSS3	0	0	0	0	0	0	0	0	0	0	0	47482000	0	0	0	4864900	2216500	5450700	1658300	439740	0	0	0	2557900	4236500	0	2754600	0	0	0
B1ANR0;Q13310;H0Y5F5;H0YEU6;P0CB38	Polyadenylate-binding protein;Polyadenylate-binding protein 4	PABPC4	0	0	11289000	0	0	0	0	0	0	0	0	0	0	0	0	211080	146000	242090	0	0	0	0	0	0	0	0	59750	158210	139280	119150
G3V4W0;G3V4C1;B2R5W2;B4DY08;G3V2D6;G3V5V7;G3V251;G3V5X6;G3V3K6;A0A0G2JPF8;A0A0G2JNQ3;P0DMR1;O60812;B2RXH8;B7ZW38;B4DSU6;G3V4M8;G3V2H6;B3KT61;E5RG71;Q86SE5		HNRNPC	3732100000	4422100000	6140200000	4000900000	4932700000	4094200000	4577200000	9833400000	8369000000	4799200000	4355800000	2931200000	3555700000	6071600000	3196100000	230130000	250710000	261730000	106740000	156650000	138950000	194170000	493090000	404510000	135060000	102120000	62393000	89690000	232480000	83511000
H0YMJ0;B3KTM8;Q9UBU8;H0YNE0;H0YLJ3;H0YLV1;H0YMT8;H0YM21	Mortality factor 4-like protein 1	MORF4L1	5216700	8395000	5787000	0	0	0	0	0	0	7762500	0	12708000	7267000	6754000	8863900	275140	452340	386750	43315	0	75703	0	0	0	219510	47442	212750	194060	289580	270240
B4DDF4;B4DUT8;Q99439;H3BVI6;A0A087X271;A0A087X1X5;K7ES69;H3BQH0;A0A087WV51;U3KPS3	Calponin;Calponin-2	CNN2	173220000	133310000	142240000	282820000	257170000	311760000	130390000	58959000	102510000	257270000	279880000	314840000	148680000	102680000	135740000	14827000	7367200	7382600	7875800	9644500	10940000	5490600	2205700	4509900	8725900	5993400	8839300	2376600	4454700	3832000
E9PPD6;E9PJL9;E9PLC6;E9PPR0;E9PQP1;E9PMX3;B4DE93;G3V0I5;P49821	NADH dehydrogenase [ubiquinone] flavoprotein 1, mitochondrial	NDUFV1	0	0	0	0	0	0	0	0	0	0	0	0	0	0	7576000	2165200	0	0	0	0	0	0	0	0	0	0	0	0	1609500	1502900
B4DGJ5;Q8N7H5	RNA polymerase II-associated factor 1 homolog	PAF1	0	0	0	0	0	0	0	0	0	0	0	0	0	0	0	0	0	0	0	0	0	0	0	0	0	0	0	0	0	0
B4DIH5;P61201	COP9 signalosome complex subunit 2	COPS2	0	0	0	0	0	0	10227000	0	0	0	0	0	6178100	0	0	309720	434790	109390	0	0	0	268200	0	0	105260	55020	58858	166350	0	42732
B4DJ81;P28331	NADH-ubiquinone oxidoreductase 75 kDa subunit, mitochondrial	NDUFS1	0	0	0	0	0	0	0	0	0	0	0	0	22386000	0	21720000	92817	83256	0	0	0	0	0	0	0	0	0	0	251280	99073	242350
B4DKY1;P49589	Cysteine--tRNA ligase, cytoplasmic	CARS	21806000	32130000	26022000	27844000	19272000	20249000	0	0	0	26985000	22748000	31134000	0	24581000	19542000	771140	1106800	616970	102600	58640	129100	0	0	0	242960	83571	304940	118840	519190	254700
B4DR61;P61619;F8W776;Q8TC24;Q9H9S3;H7C1Q9;C9JXC6;H7C069;A6NK38;F2Z2C7;A6NIF9;C9JJV4	Protein transport protein Sec61 subunit alpha isoform 1	SEC61A1	145820000	166370000	240510000	167030000	181820000	189500000	139400000	202180000	235560000	211080000	248110000	326900000	150020000	225080000	166560000	11325000	10620000	8840600	4677500	5775000	6482500	4464600	9551200	9942700	5740700	5745100	7576800	3378800	7670600	3996900
H0Y630;B4DR80;Q9Y6E0;C9JJV0;C9JDH9;C9J6L2;C9JCC0;C9J232;Q5JV98;H7C279;Q8NBY1;B4E0Y9;Q9P289;O00506	Serine/threonine-protein kinase 24;Serine/threonine-protein kinase 24 36 kDa subunit;Serine/threonine-protein kinase 24 12 kDa subunit;Serine/threonine-protein kinase 26;Serine/threonine-protein kinase 25	STK24;STK25;STK26	6166900	0	0	0	0	0	0	0	0	0	0	0	0	0	0	362760	55227	0	0	0	0	0	0	0	0	0	0	0	0	0
B4DSN5;P18031	Tyrosine-protein phosphatase non-receptor type;Tyrosine-protein phosphatase non-receptor type 1	PTPN1	0	0	0	0	0	0	0	0	0	0	0	0	0	0	0	0	0	0	0	0	0	0	0	0	0	0	0	0	0	0
J3QSB7;B4DUC8;Q13126;F8WES2;F2Z2F3	Purine nucleoside phosphorylase;S-methyl-5-thioadenosine phosphorylase	MTAP	13478000	0	0	0	0	0	0	0	0	0	0	0	0	0	0	792820	331810	0	0	0	0	0	0	0	0	0	0	108630	0	94850
E5RHD8;B4DWJ1;E9PEI4;H0YB16;H0YBZ1;H0YBP1;E7ESA6;Q05397;E5RI03	Focal adhesion kinase 1	PTK2	0	0	0	0	0	0	0	0	0	0	0	0	0	3793300	0	581900	434850	343250	0	0	238290	0	0	0	0	201110	197640	0	265510	0
B4DXZ6;P51114;E7EU85;E9PFF5;C9JZE0;C9JY20;C9JAJ4;H7C4S4;R9WNI0;A8MQB8;G3V0J0;Q06787	Fragile X mental retardation syndrome-related protein 1	FXR1	26039000	24288000	21915000	22282000	22703000	12427000	21735000	36277000	29939000	17740000	20475000	32825000	0	0	0	875390	688680	356160	369000	334750	275400	426980	935440	1123500	246620	247670	488510	121210	0	0
B4DY09;Q12905;X6R6Z1;A0A0A0MRL0	Interleukin enhancer-binding factor 2	ILF2	164940000	173370000	271150000	210520000	123190000	125160000	92603000	55486000	64717000	125100000	119830000	127960000	171990000	173700000	194400000	8747800	10310000	12322000	5462800	2587300	3246300	3318800	1866600	2456600	2703100	2519700	3053900	3985600	6133800	4626200
Q9BUN8;B4E1G1;E5RGY0	Derlin-1	DERL1	0	0	0	0	0	0	0	0	23047000	0	0	0	0	0	0	425990	416940	549670	282920	386310	405210	511800	1903300	1472400	0	81432	87265	0	0	0
B5MBZ0;Q9HC35	Echinoderm microtubule-associated protein-like 4	EML4	0	5299400	0	0	0	0	0	16009000	12894000	0	0	0	0	0	0	30568	76274	16222	0	0	0	28615	183570	237400	11745	0	0	0	0	0
B5MBZ8;C9JD73;C9J177;H7C003;Q15435	Protein phosphatase 1 regulatory subunit 7	PPP1R7	0	4280400	0	0	0	0	0	0	0	0	0	0	0	0	0	374800	242380	0	0	0	0	0	0	0	0	0	0	0	0	0
B5MCB4		MECP2	0	21994000	0	0	51507000	35324000	81904000	57064000	0	44805000	36867000	51208000	0	0	0	1445000	2500600	0	739820	2875300	2177500	6456900	5174200	2896100	2994500	650550	2479200	113470	0	0
B5MCF9;O00541;B3KXD6;H7BYY8;H7C267	Pescadillo homolog	PES1	18948000	20450000	19033000	18086000	19808000	21054000	33125000	66626000	63631000	28114000	27293000	29614000	21772000	21391000	19360000	352450	419900	187180	354410	446050	518440	550530	1251300	1543400	553380	374640	558040	110830	412370	147260
B5MDF5;P62826;J3KQE5;F5H018;H0YFC6;B4DV51;A0A087X0W0	GTP-binding nuclear protein Ran	RAN	1839500000	1847300000	1768100000	1574000000	1572600000	1438100000	1466600000	2113000000	1965500000	1350000000	1308000000	1347600000	1389700000	1165800000	1285100000	184570000	173480000	117230000	65680000	75181000	76905000	95575000	148630000	145870000	59118000	33815000	39159000	53524000	73395000	50071000
B7WP74;Q9HCG8	Pre-mRNA-splicing factor CWC22 homolog	CWC22	7791900	14246000	27393000	29165000	14895000	10773000	11532000	8945300	9950000	17325000	19798000	33625000	11523000	19668000	0	219520	298980	566310	263720	194280	149170	103410	223410	194300	191560	211360	247860	85188	306360	152710
B7Z641;B7Z2A9;Q93050;K7EPG4;F5H1T6;K7EQW2;K7ELZ6;K7ERA0;K7EM24;K7ERA6;K7EN36	V-type proton ATPase subunit a;V-type proton ATPase 116 kDa subunit a isoform 1	ATP6V0A1	0	0	0	35711000	34587000	47750000	26869000	45600000	41908000	25218000	25815000	16986000	0	30200000	0	0	0	128500	489470	682850	1044600	624950	1376300	759370	198530	125930	89104	0	821180	0
D6RHJ7;B7Z415;D6RGG7;P09417	Dihydropteridine reductase	QDPR	0	0	0	0	0	0	0	0	0	0	0	0	9363100	0	0	4092400	1787900	0	510000	0	0	0	0	0	1201200	0	0	1811600	0	0
B7Z6D5;Q96GQ7;A0A087X059;A0A087WYH5	Probable ATP-dependent RNA helicase DDX27	DDX27	26642000	32345000	26861000	29257000	32334000	33549000	38585000	73560000	66174000	52704000	54383000	50690000	19112000	27810000	17924000	525460	818360	181680	356150	409710	485440	598940	1816200	1113100	705020	626960	455610	161010	372090	126960
F8WC82;C9J4N2;C9K058;B8ZZ77;Q9H2H8	Peptidyl-prolyl cis-trans isomerase;Peptidyl-prolyl cis-trans isomerase-like 3	PPIL3	0	0	0	0	0	0	0	0	0	0	0	0	0	0	0	0	0	0	0	0	0	0	0	0	0	0	0	0	0	0
B8ZZC5;B8ZZA8		GLS	0	3758700	0	0	0	0	0	0	0	0	0	0	0	0	0	716960	681070	0	0	0	0	0	0	0	0	0	0	0	0	0
B8ZZN6;P63165;B8ZZJ0;B9A032;G2XKQ0;B8ZZ67	Small ubiquitin-related modifier 1;Small ubiquitin-related modifier	SUMO1	49677000	55663000	15332000	46581000	50372000	51452000	47631000	61902000	65769000	71509000	56282000	0	0	0	47467000	5465600	5356700	1652700	1413300	3013500	3454800	3884900	5666500	5204100	2209800	2192100	1162300	1287700	1265400	1804800
B8ZZQ6;P06454;B8ZZA1;B8ZZW7;H7C2N1	Prothymosin alpha;Prothymosin alpha, N-terminally processed;Thymosin alpha-1	PTMA	341300000	242170000	22515000	38091000	94910000	73475000	263040000	64952000	62601000	43448000	19191000	54634000	446870000	260250000	346070000	124850000	83982000	4886900	5546400	14215000	11721000	54008000	14079000	14175000	5461800	1503600	5950700	59845000	45910000	39403000
B8ZZU8;I3L0M9;Q15370	Transcription elongation factor B polypeptide 2	TCEB2	0	0	0	0	0	0	0	0	0	0	0	0	0	0	7823000	1164900	679060	0	305940	0	529370	763250	0	0	0	0	180970	333830	415770	387990
Q92764;C4AM86;CON__Q92764	Keratin, type I cuticular Ha5	KRT35	0	0	0	0	0	0	0	0	0	0	0	0	0	228330000	47654000	0	0	68541	0	116250	0	148400	159970	233240	0	0	38937	29823	6276800	974400
C9IYD3;C9JQC9;C9JPY2;C9J670;Q9NW15	Anoctamin-10	ANO10	0	0	0	0	0	0	0	0	0	0	0	0	0	0	31389000	3009200	3599300	5560900	1149700	873870	897460	683930	1011000	827250	833510	987700	974970	770880	3003900	1779100
C9J0H3;C9JE06;C9J7K9;O15162	Phospholipid scramblase 1	PLSCR1	0	0	0	0	0	0	0	0	6420800	0	0	0	0	0	0	0	0	0	0	0	0	255490	469990	644600	0	0	0	0	0	0
C9J0K6;P30626;B4DHQ6	Sorcin	SRI	0	0	0	0	0	0	0	0	0	0	0	0	0	0	9802500	89676	0	0	436610	514260	728820	139730	0	0	266240	249230	310740	80920	0	299170
C9J1E7;Q10567	AP-1 complex subunit beta-1	AP1B1	0	0	0	0	0	0	0	0	0	0	0	0	0	8893000	0	221930	161990	131190	160770	0	169600	0	0	0	72294	93731	0	79155	171710	0
D6RBD7;C9J1V9;O43324	Eukaryotic translation elongation factor 1 epsilon-1	EEF1E1;EEF1E1-BLOC1S5	0	0	0	0	0	0	0	0	0	0	0	0	0	0	3542900	421490	27198	0	0	103080	0	660750	168860	0	0	0	47811	278620	81150	140570
C9J1Z8;P84085	ADP-ribosylation factor 5	ARF5	0	0	0	0	0	0	0	0	0	0	0	0	0	0	0	0	0	0	0	0	0	0	0	0	0	0	0	0	0	0
Q9BQ75;C9J384;H7C515	Protein CMSS1	CMSS1	0	0	9211500	0	0	0	0	0	0	0	0	0	0	0	0	567460	474210	574640	0	0	187250	4027800	0	240690	1569300	1609600	1752500	0	0	0
C9J6P4;Q7Z2W4	Zinc finger CCCH-type antiviral protein 1	ZC3HAV1	0	0	0	0	0	0	0	0	5514200	0	0	0	0	0	0	0	0	0	0	0	0	0	55711	62500	0	0	0	0	0	0
C9J7L8;Q9Y305	Acyl-coenzyme A thioesterase 9, mitochondrial	ACOT9	0	0	0	0	0	0	0	0	0	0	0	0	0	4008500	0	558910	0	236610	0	0	0	0	0	0	0	0	0	0	249400	0
C9J830;P13861	cAMP-dependent protein kinase type II-alpha regulatory subunit	PRKAR2A	0	0	1189700	0	0	0	0	0	0	0	0	0	0	0	0	455490	276470	163270	0	0	0	0	0	0	0	0	0	0	0	0
C9J8H1;P36543	V-type proton ATPase subunit E 1	ATP6V1E1	0	0	0	0	0	0	0	0	0	0	0	0	0	0	6008500	0	0	0	0	0	0	0	0	198160	166340	143830	142040	383960	291630	264880
C9J9V0;Q5THK1	Protein PRR14L	PRR14L	0	0	0	0	0	0	0	0	0	0	0	0	0	0	6200800	865620	713780	414950	0	0	238850	661810	803850	1196300	225950	160300	484800	210580	300510	223660
C9JA28;Q9UNL2	Translocon-associated protein subunit gamma	SSR3	14632000	18498000	17562000	15546000	0	0	32811000	29745000	0	17838000	26272000	0	0	0	0	2892200	3515500	2434400	1461000	1971800	2290600	3437900	4433700	3545100	1554400	1725100	956550	1409200	2219900	1292500
C9JAW5;C9JNU6;Q9Y241	HIG1 domain family member 1A, mitochondrial	HIGD1A	0	0	0	6454300	6078000	5625800	6812700	7877600	5902200	4290600	0	0	0	0	3092100	0	0	0	741590	732090	738160	928660	1227300	1118200	393760	241650	316660	0	293740	334170
C9JB90;C9JU14;J3KR73;Q9NRW1;P20340;Q14964	Ras-related protein Rab-6B;Ras-related protein Rab-6A;Ras-related protein Rab-39A	RAB6B;RAB6A;RAB39A	0	0	0	0	0	0	0	0	0	0	0	0	0	0	23434000	28851000	21902000	9576900	243530	0	0	0	6725000	6365300	4192500	2080100	3473000	1315000	4663600	3099200
E9PNC7;E9PQX9;C9JCC6;Q14919	Dr1-associated corepressor	DRAP1	0	17966000	0	0	5967200	6478000	0	0	5966600	0	0	0	6824800	5406400	0	3719000	3100800	1728900	412560	564680	777800	745830	556400	904390	103130	78121	62403	639920	577440	114550
C9JE25;Q99551	Transcription termination factor 1, mitochondrial	MTERF1	0	0	0	0	0	0	0	0	1048100000	0	0	0	0	0	0	0	0	0	0	0	0	0	0	66958000	0	0	0	0	0	0
C9JEY1;C9K057;O15143;C9JBJ7;F8VXW2;C9JTT6;C9JM51;F8WEB3	Actin-related protein 2/3 complex subunit 1B	ARPC1B	0	0	0	0	0	0	0	0	0	0	0	0	0	0	10167000	614400	384960	198990	260590	499510	360280	737870	524690	533830	123490	92567	117330	250500	238890	252110
C9JFE4;Q13098;A0A096LP07;A0A096LPJ3;A8K070;J3QQX0;J3QS84;J3QS88;J3KTB0;J3QLE8;J3QLT0;J3QL53;J3KRE8;J3KSA5;J3KRJ4	COP9 signalosome complex subunit 1	GPS1	12318000	8668700	0	0	0	0	0	0	0	0	0	0	0	0	0	672750	446830	63855	0	0	26560	0	0	0	0	0	0	202910	132500	195350
C9JFR7;P99999;CON__P62894	Cytochrome c	CYCS	16577000	18823000	0	0	24362000	0	56604000	0	0	0	0	0	62139000	39898000	46722000	6727700	4393300	284160	558120	1489200	602330	5981600	670580	745360	246300	450030	334190	3191900	3010200	2643100
C9JHW1;E7ESB6;I1E4Y6;Q6Y7W6	PERQ amino acid-rich with GYF domain-containing protein 2	GIGYF2	2969400	0	0	0	0	0	0	0	0	0	0	0	0	0	0	109980	0	0	0	0	0	0	0	0	0	0	0	0	0	0
P07602;C9JIZ6;Q5BJH1	Prosaposin;Saposin-A;Saposin-B-Val;Saposin-B;Saposin-C;Saposin-D	PSAP	32568000	23012000	0	0	0	18500000	88673000	20585000	34648000	0	16375000	0	77640000	95587000	295110000	674120	416280	15043	19713	40577	89136	2788100	174300	826010	84059	168390	54308	1967900	1753900	2665200
C9JJ19;P82930	28S ribosomal protein S34, mitochondrial	MRPS34	10029000	11998000	4476000	9203800	12698000	9274500	18233000	21356000	26004000	8758300	0	6231700	6324500	6854600	5620100	589950	633810	213870	297650	341850	368000	1114800	1695700	1067200	280320	150950	159500	180390	286730	162550
C9JJ68;Q86XF0	Dihydrofolate reductase, mitochondrial	DHFRL1	58153000	53634000	41892000	33229000	35787000	45601000	55399000	53152000	57167000	14814000	43687000	56534000	0	55182000	61386000	12467000	10137000	3315400	2075800	2086400	3421700	4565400	5162800	5524300	747300	2030500	2084500	647410	3908100	3267500
Q92734;C9JJP5;C9JUE0	Protein TFG	TFG	0	0	0	0	0	0	0	0	0	0	0	0	0	0	8239500	0	0	0	318360	0	0	0	0	0	0	0	0	132990	0	233510
C9JJT5;C9JU26;G3V325;P56134	ATP synthase subunit f, mitochondrial	ATP5J2-PTCD1;ATP5J2	35648000	26609000	13243000	33410000	9699400	13646000	25010000	36521000	8800700	0	0	8945500	0	20954000	11429000	7607500	5111500	2581300	2926500	1413700	2039800	3400900	5436400	3132400	715170	684000	1144800	937810	2902600	1505600
C9JLU1;P52434	DNA-directed RNA polymerases I, II, and III subunit RPABC3	POLR2H	0	0	0	0	0	0	0	0	0	0	0	0	6767000	0	0	390790	0	0	0	0	0	185080	257840	0	0	0	175530	290960	106020	146840
J3QL22;J3QS85;J3KTQ1;J3QKR0;C9JLV5;Q9UNS2	COP9 signalosome complex subunit 3	COPS3	0	0	0	0	0	0	0	0	0	0	0	0	0	0	3035500	0	0	0	583850	491450	777460	0	0	83048	377290	88628	259540	821860	0	602190
C9JXB8;C9JNW5;P83731	60S ribosomal protein L24	RPL24	1344300000	1324800000	1467100000	1147100000	1459900000	1413200000	1500200000	1963300000	1739900000	1440700000	1531900000	1309800000	717250000	742840000	670170000	189920000	162810000	142190000	73475000	96042000	105050000	134260000	200410000	180930000	86527000	77143000	64748000	44037000	51653000	37343000
G5E9W8;C9JQ42;P46976	Glycogenin-1	GYG1	0	0	0	0	0	0	0	0	0	0	0	0	5434000	0	0	815410	0	0	0	0	0	0	0	0	0	0	0	262850	0	0
E9PDR0;C9JQS9;E7EX59;P05166;E7EUY3;E7ETT1;E7ETT4;E9PEC3;F8WBI9;E7ENC1;H7C5C9;C9JVW9;C9JVY9;C9JAW3	Propionyl-CoA carboxylase beta chain, mitochondrial	PCCB	208110000	153990000	285560000	207370000	118400000	110740000	116150000	65720000	31111000	138370000	100590000	107600000	365530000	275980000	193880000	6780800	4983000	7803500	2951400	1215500	1114000	1810000	796180	509590	1687600	952970	942820	5004400	5488900	2906800
C9JQV0;Q9BRJ6;H7C0T1;H7C2R9	Uncharacterized protein C7orf50	C7orf50	0	0	0	0	0	0	0	0	14470000	0	0	0	0	0	0	0	0	0	0	0	0	498720	694840	1271100	0	0	0	0	0	0
C9JW69;P18754;C9JRH2;C9J3R0;C9JMJ4;C9JQZ4	Regulator of chromosome condensation	RCC1	19842000	16648000	0	0	0	15297000	29342000	40815000	37063000	15601000	0	13919000	0	21850000	0	1406100	953430	135430	67823	70838	294180	844020	2293000	2182000	237240	334070	176280	68921	1171200	0
E7EVL6;C9JZE3;C9JYJ8;Q9BWE0	Replication initiator 1	REPIN1	0	0	0	0	0	0	0	0	0	0	0	1824200	0	0	0	240850	0	0	0	0	0	0	190640	176380	0	72700	79372	0	0	0
C9JZR2;O60716;E9PRE2;E9PKL1	Catenin delta-1	CTNND1	44552000	42231000	46947000	55898000	49018000	51913000	33259000	0	0	37019000	38773000	33194000	36273000	39689000	35616000	974840	525530	513230	528630	679210	544570	209030	352060	201910	423590	359920	246300	195130	336950	290000
Q70E73;C9K0J5;C9J164	Ras-associated and pleckstrin homology domains-containing protein 1	RAPH1	0	0	0	12190000	0	11274000	14283000	0	31274000	0	0	0	0	0	0	0	35848	79344	86932	60007	101170	200530	50439	433910	0	61193	56597	0	0	47749
CON__A2A4G1;CON__Q8N1A0;CON__Q7Z3Y9;Q8N1A0;Q7Z3Y9			0	0	0	0	0	0	0	0	0	0	0	0	0	49912000	27827000	59338	138460	166140	152900	203290	49710	0	158670	142480	182430	176310	167050	64236	983220	478210
CON__A2A5Y0			0	0	0	0	0	0	0	0	0	0	0	0	0	801390000	0	0	0	69781	0	0	0	0	0	0	0	0	0	0	16620000	696840
O43790;CON__O43790;U3KPR1	Keratin, type II cuticular Hb6	KRT86	0	1116300	1192100	0	0	0	0	0	1690500	2357200	0	0	3989100	2689500000	13075000000	196000	280150	281650	53500	165900	78808	0	339160	404970	100780	166220	202510	272020	79222000	144880000
O76009;CON__O76009;CON__Q6NTB9	Keratin, type I cuticular Ha3-I	KRT33A	675500	2271300	0	896900	3035500	1533200	1710900	1987100	1152000	0	512200	715530	0	6773300000	13121000000	373390	540690	148420	234950	624800	766500	1069500	1593600	815210	153030	84456	141690	82574	143400000	183880000
CON__O76011;O76011	Keratin, type I cuticular Ha4	KRT34	0	0	0	0	0	0	0	0	0	0	0	0	0	0	339120000	0	0	0	0	0	0	0	0	0	0	0	0	0	0	5850000
CON__O76013;O76013	Keratin, type I cuticular Ha6	KRT36	0	0	0	0	0	0	0	0	0	0	0	0	0	1056500000	0	32575	0	0	0	0	0	0	0	0	0	0	0	0	21912000	96972
CON__O76015;O76015	Keratin, type I cuticular Ha8	KRT38	0	0	0	0	0	0	0	0	0	0	0	0	0	0	323620000	0	0	0	0	0	56489	0	0	0	0	0	0	0	0	5350000
CON__O95678;O95678	Keratin, type II cytoskeletal 75	KRT75	0	0	0	0	0	0	0	0	0	0	0	0	0	0	947700000	0	0	0	0	0	0	0	0	0	0	0	0	0	24020000	12534000
CON__P00761			73232000000	70784000000	99840000000	54838000000	70306000000	61671000000	52861000000	48799000000	40772000000	83939000000	100820000000	86440000000	63277000000	50925000000	50608000000	4457400000	4469700000	4636700000	2243600000	2924100000	3111500000	3031200000	3255200000	2767300000	2865200000	2962300000	3470700000	2822500000	2825800000	2637700000
CON__P01044-1;CON__Q2KJ62;CON__P01045-1			7232000	7551900	21237000	9378300	11915000	0	38227000	16910000	41265000	0	10585000	0	15610000	0	10884000	201280	118530	442150	71799	254490	88403	616070	201640	911900	0	46009	95981	260510	0	137830
CON__P01966;A0A2R8Y7C0			59326000	62664000	58108000	97636000	104650000	75438000	112460000	139420000	225440000	57863000	218360000	197950000	116400000	133870000	68428000	4360200	3266300	2409600	6018900	5947300	5440500	8782500	13356000	19886000	2232100	8156700	8320100	4986000	8646400	1826700
CON__P02533;P02533;CON__Q61782;K7ENV3;CON__Q9D312	Keratin, type I cytoskeletal 14	KRT14	823460000	2336700000	2237000000	951650000	1665700000	679390000	670390000	1699600000	1425800000	2246300000	2918100000	2075400000	3481200000	1691400000	3046900000	28653000	72487000	52781000	13032000	28077000	13120000	14886000	41808000	35740000	32561000	34349000	25025000	50345000	32835000	40997000
CON__P02535-1;CON__Q2M2I5;Q2M2I5			0	0	0	0	0	0	0	0	0	0	0	0	0	0	5111900	0	0	42968	33214	0	0	0	0	0	167720	153600	0	55740	111180	118730
CON__P02538;P02538;Q8IWY7	Keratin, type II cytoskeletal 6A	KRT6A	14097000	56157000	41242000	10423000	22404000	12110000	18580000	27239000	31695000	20258000	90872000	40790000	31376000	18085000	23691000	430960	1218000	757130	139340	388310	200170	400730	679350	1006200	347280	761490	559100	613470	347190	355650
CON__P02662			0	17849000	65167000	0	28055000	337400000	1069000000	393730000	206020000	14390000	31401000	455190000	0	15526000	22137000	1174400	2913600	4439000	0	2176900	20259000	73215000	33271000	15344000	1221100	1648800	18497000	238440	1103200	1211900
CON__P02663			0	0	0	0	0	64307000	415460000	81859000	55389000	0	14951000	63541000	0	0	0	557470	410300	622420	0	106650	2322500	23515000	3885700	3447300	0	196750	3338200	0	78410	124690
CON__P02666			0	28537000	24591000	0	0	66761000	1074200000	135430000	83976000	0	28778000	82833000	0	0	0	1470200	5183400	3489400	0	1866100	13200000	93701000	20265000	12512000	994120	1700900	13601000	0	663700	885020
CON__P02668			0	0	0	0	0	64028000	366920000	73978000	37580000	0	0	116840000	0	0	0	0	0	0	0	0	3035900	38505000	4432600	2155400	0	0	6381500	0	0	0
CON__P02754			0	0	0	0	0	29631000	105440000	0	0	0	0	497570000	32644000	0	20539000	0	0	0	134390	0	544580	12040000	946540	254470	0	0	13875000	375070	0	388040
CON__P02769;H0YA55;C9JKR2;D6RHD5;B7WNR0			2801900000	2191800000	2840400000	4755800000	6632100000	7000400000	7540900000	5870600000	6104500000	2227100000	6823600000	8812000000	2540900000	1361700000	2080500000	63393000	51834000	44864000	47049000	74257000	87824000	109330000	92534000	94562000	19828000	109300000	66818000	23984000	15766000	17504000
CON__P04259			152140000	388020000	393270000	161380000	444090000	69039000	215360000	489190000	508460000	262330000	938530000	562820000	684020000	360800000	545750000	3805100	11023000	9334400	1739100	6209200	954570	3522300	11608000	13190000	3643900	12131000	7206600	11113000	5518000	8244800
CON__P05784			0	0	0	0	0	0	0	0	0	0	0	0	0	0	27700000	389290	224840	396540	155570	171170	30909	55312	59188	157600	204880	0	128900	34067	70907	475080
P05787;CON__P05787;F8VUG2;F8W1U3;CON__H-INV:HIT000292931;CON__Q9H552;F8VP67;CON__Q9DCV7;CON__H-INV:HIT000016045;A0A1X7SCE1;K7EJU1;F8VQY3;H0YIB2;CON__REFSEQ:XP_092267;K7EPI4;A0A1W2PS58;A0A1W2PQU7	Keratin, type II cytoskeletal 8	KRT8	599890000	558620000	586290000	438520000	530410000	577930000	504870000	661630000	686270000	406890000	387240000	394860000	551730000	508980000	543720000	22163000	19333000	13091000	6220700	7854900	10060000	9965800	17117000	17464000	5466300	3940200	4094400	7340000	10720000	8824600
CON__P08727;P08727;C9JM50;K7EMS3	Keratin, type I cytoskeletal 19	KRT19	0	0	0	0	0	0	0	0	0	0	0	0	0	2567500	0	0	0	0	0	0	0	0	0	0	91610	50617	23806	205280	46377	0
CON__P08729;CON__Q3KNV1;P08729	Keratin, type II cytoskeletal 7	KRT7	0	0	0	0	0	0	0	0	0	0	0	0	0	204530000	301360000	0	0	0	0	44735	29345	0	0	112490	48882	0	17694	0	3637300	4344200
CON__P08730-1			39915000	53238000	44375000	0	0	0	0	0	0	184230000	48933000	32544000	58555000	82081000	68310000	1419200	1736100	1168200	0	0	49474	15165	32885	0	2691400	711040	415500	806640	1680200	1081500
P08779;CON__P08779;K7ENW6	Keratin, type I cytoskeletal 16	KRT16	75504000	300430000	241880000	97870000	446300000	55030000	135860000	268690000	349350000	156330000	456240000	335640000	523520000	240380000	370010000	2924200	10509000	6814900	1127700	7411600	477540	1826600	7182400	8889100	2227300	5961700	4116400	6673000	4006500	4568000
CON__P12035;P12035	Keratin, type II cytoskeletal 3	KRT3	0	0	0	0	0	0	0	0	0	0	0	0	0	0	16201000	0	0	0	112630	273280	223750	171510	0	119540	674940	406900	256440	330900	267240	200870
CON__P12763;P02765			252600000	222110000	297590000	295720000	380030000	291380000	647720000	426440000	729840000	259110000	261070000	334380000	477520000	191050000	206530000	19502000	13209000	15414000	9747500	13776000	12702000	35143000	21130000	36372000	9916800	6652400	8932000	11806000	7963300	6186900
CON__P13645;P13645;CON__Q7Z3Y7;Q7Z3Y7;CON__Q148H6;CON__Q7Z3Z0;CON__Q7Z3Y8;Q7Z3Z0;Q7Z3Y8	Keratin, type I cytoskeletal 10	KRT10	14685000000	31767000000	32000000000	15404000000	22140000000	13245000000	8663000000	14332000000	10080000000	63877000000	38243000000	27264000000	39643000000	45157000000	43909000000	597200000	1191800000	923510000	278490000	408860000	287700000	215170000	379850000	263150000	970550000	517180000	367820000	652250000	1003100000	713910000
CON__P13647;P13647;H0YI76;F8W0C6;H0YIN9;F8VV57	Keratin, type II cytoskeletal 5	KRT5	705650000	1972000000	1637400000	876610000	1216300000	735030000	601200000	1027600000	842130000	2132600000	2144300000	1412200000	2408300000	1564600000	2247300000	21471000	55732000	39309000	11523000	20654000	12066000	10863000	22802000	19802000	31503000	25297000	15048000	32974000	28382000	29687000
CON__P15636			30802000000	45509000000	55440000000	50177000000	69667000000	74499000000	54398000000	60595000000	52606000000	46357000000	66338000000	54623000000	40095000000	37509000000	56709000000	1292700000	1580600000	1500000000	841680000	1226600000	1136200000	1314400000	1887500000	1538400000	1078100000	1035000000	888390000	889230000	1046000000	1093400000
CON__P19013;P19013;F8VX05;F8VZR6	Keratin, type II cytoskeletal 4	KRT4	0	0	0	0	49787000	0	78079000	0	0	123400000	70432000	0	0	0	0	486520	833100	0	506700	553070	420570	1329400	1873300	2164500	1698100	1020700	0	0	0	256730
CON__P20930;P20930	Filaggrin	FLG	10355000	24092000	10791000	0	8373300	5836000	0	0	0	10414000	59762000	9199500	15300000	11155000	22715000	17494	61164	25394	3060.7	14494	7657.7	15962	0	0	34298	96903	23303	28217	42830	56792
CON__P34955			146120000	157390000	173440000	121850000	181370000	127680000	246850000	172220000	238990000	114400000	74025000	137670000	177580000	69203000	62002000	2809100	3451700	1875700	815310	1541800	1218700	2901800	3410200	4462700	775480	190810	1320900	24478000	692280	394390
CON__P35908;H0YID6			43271000	51928000	83206000	0	44948000	0	0	33635000	22553000	96546000	56790000	43540000	83251000	0	39178000	871640	1076600	1220600	269830	451970	184170	250950	472080	310400	1059700	525220	540140	938270	672760	519180
CON__P35908v2;P35908	Keratin, type II cytoskeletal 2 epidermal	KRT2	12461000000	26097000000	28263000000	12536000000	20719000000	9925400000	8532400000	11960000000	9107800000	40556000000	29567000000	24462000000	38604000000	30633000000	33658000000	301250000	582790000	481110000	125520000	230450000	124470000	121530000	211010000	151040000	420260000	274280000	209630000	403110000	468700000	341130000
CON__P50446			0	0	0	0	0	0	0	0	0	0	0	0	0	35967000	0	0	0	0	0	0	11202	0	0	0	471540	0	0	0	694480	0
CON__P78385			0	0	0	0	0	0	0	0	0	0	0	0	0	0	31233000	0	0	0	0	0	0	0	0	0	0	0	0	0	0	413060
P78386;CON__P78386;F5GYI5	Keratin, type II cuticular Hb5	KRT85	0	1743500	0	0	1926600	918100	0	0	0	2134300	0	921120	884970	6008900000	21480000000	155790	976430	41029	0	107850	192210	0	36019	32754	120440	52172	186000	139410	154180000	228890000
CON__P81644			0	0	0	0	0	0	0	0	0	0	0	1376700	0	0	0	284900	232350	0	66250	245390	124900	506240	235540	313820	54762	0	95838	0	0	0
CON__Q04695;Q04695;F5GWP8;K7EPJ9;K7ESE1;A0A3B3IS58	Keratin, type I cytoskeletal 17	KRT17	50323000	135990000	140820000	43135000	125790000	35044000	60372000	179400000	77431000	127500000	229380000	167940000	279830000	126800000	141970000	604350	3580100	3043700	682220	1450300	519180	863080	3089500	1681600	1638300	3625400	2368200	4570300	2701000	2048800
CON__Q14525;Q14525	Keratin, type I cuticular Ha3-II	KRT33B	0	0	0	0	0	0	0	0	0	0	0	0	0	1174600000	496090000	0	311770	0	0	0	0	0	0	0	0	0	456740	118530	9891200	17576000
CON__Q14533;A0A087X106;Q14533	Keratin, type II cuticular Hb1	KRT81	0	0	0	0	0	0	0	0	0	0	0	0	0	0	591980000	0	0	38165	0	0	0	0	0	0	0	0	0	30452	0	8361400
CON__Q15323;CON__Q9UE12;Q15323	Keratin, type I cuticular Ha1	KRT31	0	0	0	0	0	43530000	0	0	0	0	0	0	0	802570000	2962800000	131500	290170	351520	126770	192120	223140	0	0	255860	0	0	0	135930	30875000	36073000
CON__Q32MB2;Q86Y46;CON__Q7RTS7;F8W1S1;Q7RTS7;H0YIC5;CON__Q3SY84;Q3SY84	Keratin, type II cytoskeletal 73;Keratin, type II cytoskeletal 74;Keratin, type II cytoskeletal 71	KRT73;KRT74;KRT71	0	0	0	0	0	0	0	0	0	0	0	0	0	0	95880000	1183000	3522700	2359500	682070	962800	672370	625890	1273000	840200	1414400	1077100	713830	1520600	727100	1682900
CON__Q3SX09;CON__P02070;A0A2R8Y7R2;E9PFT6;P68871;P02042;F8W6P5;E9PEW8;A0A2R8Y7X9;P69892;P69891;P02100			65150000	32545000	40757000	73185000	74068000	74089000	57005000	120420000	150270000	31893000	132290000	105060000	109080000	61807000	21898000	2555600	936850	915900	1156700	969730	1791400	2490800	6041800	7147300	995570	3025300	10598000	5965200	7183700	3512200
CON__Q3SZ57			0	0	2011800	0	0	0	0	0	0	0	0	0	0	0	0	0	0	38348	0	0	0	0	0	46025	0	0	0	0	0	0
CON__Q3SZH5			0	0	0	4985500	0	0	0	0	6565100	0	0	0	0	6172600	0	126680	0	0	85039	0	39644	84932	0	204620	0	121270	77934	57091	272520	0
CON__Q9Z2K1;CON__Q3ZAW8			0	0	0	0	0	0	0	0	0	0	0	68565000	0	0	0	451420	630720	39014	0	512860	100620	731740	446570	85399	547850	20536	795530	9909.9	237620	0
CON__Q3ZBS7			29358000	33704000	39388000	46017000	100290000	54420000	105410000	105730000	201160000	79623000	78678000	133210000	22632000	34441000	16706000	1300300	1301400	1362100	1232600	2865400	2304300	3487000	4827300	8145000	2217200	1677000	2863700	427720	407040	185790
CON__Q497I4;J3QR55;CON__Q9C075;Q9C075			0	0	0	0	0	0	0	0	0	0	0	0	0	401780000	355110000	0	0	0	0	0	0	0	0	0	0	0	0	13981	9822700	3789300
CON__Q58D62			0	0	0	0	0	0	0	0	7778800	0	0	0	0	0	0	0	0	0	33401	0	0	72829	75232	303690	0	0	15484	0	0	0
CON__Q5D862;Q5D862	Filaggrin-2	FLG2	47657000	100210000	89427000	89818000	90498000	81137000	38072000	57113000	37796000	232690000	231470000	127730000	165680000	251480000	204010000	527070	1109800	851690	504080	541550	454850	268380	473890	359750	1724500	1091400	491220	854960	2159700	945660
CON__Q5XKE5;Q5XKE5	Keratin, type II cytoskeletal 79	KRT79	0	0	0	0	0	0	0	0	0	0	0	0	0	451790000	0	0	0	0	0	0	0	0	0	0	0	0	0	0	9035100	0
CON__Q5XQN5;CON__Q922U2;F8VU69;H0YHD9;F8VS61;CON__REFSEQ:XP_932229			0	0	0	0	0	0	0	0	0	0	0	0	0	0	76891000	1405900	1224500	928080	472600	550680	655600	840710	1269200	1300500	694120	554590	726480	986540	1121500	984120
CON__Q61726			0	0	0	0	0	0	0	0	0	0	0	0	0	1645200000	115400000	0	0	0	0	0	0	0	0	0	23753	0	0	0	34394000	1417500
Q6A162;CON__Q6IFU5;G3V1C2	Keratin, type I cytoskeletal 40	KRT40	0	0	0	0	0	0	0	0	0	0	0	0	0	0	8412600	0	0	124030	0	0	0	0	0	0	0	0	0	0	0	196340
Q6A163;CON__Q6IFU6;J3QRE9	Keratin, type I cytoskeletal 39	KRT39	0	0	0	0	0	0	0	0	0	0	0	0	0	0	25090000	0	0	0	0	0	0	0	0	0	0	0	0	0	0	331820
Q6KB66;CON__Q6KB66-1;CON__Q0VBK2	Keratin, type II cytoskeletal 80	KRT80	0	31957000	27807000	0	30690000	0	0	0	0	43713000	34079000	25181000	34118000	35142000	40907000	59897	694610	654520	117680	247320	203790	0	0	88055	667130	530900	198730	324760	560220	534010
CON__Q6NT21;P78385	Keratin, type II cuticular Hb3	KRT83	0	0	0	0	0	0	0	0	0	0	0	0	0	0	387220000	100700	0	0	0	0	0	0	274570	259270	0	0	0	0	1399700	5583400
CON__Q7Z794;Q7Z794	Keratin, type II cytoskeletal 1b	KRT77	25031000	86294000	27557000	28414000	13772000	12654000	14090000	6307100	0	405490000	29774000	31940000	47939000	423520000	65497000	403150	2218300	769270	597970	131540	546110	220340	213830	52815	5161200	762370	472780	1185400	6899900	605780
CON__Q86YZ3;Q86YZ3	Hornerin	HRNR	126930000	465750000	218180000	171960000	383660000	200990000	179980000	283990000	168120000	358840000	469150000	289620000	542100000	393440000	640380000	1336100	5352700	1813000	776490	2072600	1077800	1183700	2338200	1130500	1498700	2063900	1126600	2614100	2462200	3235900
CON__Q9BYQ5;Q9BYQ5	Keratin-associated protein 4-6	KRTAP4-6	0	0	0	0	0	0	0	0	0	0	0	0	0	0	100540000	0	0	0	0	0	0	0	0	0	0	0	0	0	0	2659400
CON__Q9BYR4;Q9BYR4	Keratin-associated protein 4-3	KRTAP4-3	0	0	0	0	0	0	0	0	0	0	0	0	0	0	391480000	0	0	0	0	0	0	0	0	0	0	0	0	0	0	11095000
CON__Q9BYR8;Q9BYR8	Keratin-associated protein 3-1	KRTAP3-1	0	0	0	0	0	0	0	0	0	0	0	0	0	0	176670000	0	0	0	0	0	0	0	0	0	0	0	0	0	0	23365000
CON__Q9BYR9;Q9BYR9;P0C7H8	Keratin-associated protein 2-4;Keratin-associated protein 2-3	KRTAP2-4;KRTAP2-3	0	0	0	0	0	0	0	0	0	0	0	0	0	859430000	1112600000	0	0	0	0	0	0	0	0	0	0	23639	99673	90414	37223000	71427000
CON__Q9NSB4;Q9NSB4	Keratin, type II cuticular Hb2	KRT82	0	0	0	20235000	0	0	25825000	0	0	0	0	0	0	250000000	1672000000	11411	5345.5	0	84645	125460	112280	207380	193670	146920	29641	28011	38733	35329	20383000	9744800
CON__Q9TT36			0	0	0	0	0	0	0	0	0	0	0	6448500	0	0	0	0	2277200	0	0	0	0	0	0	0	192860	0	106890	0	0	0
CON__REFSEQ:XP_001474382			0	0	0	0	0	0	0	0	0	0	0	0	0	94079000	0	0	0	0	0	0	0	0	0	0	0	0	0	0	8780000	0
CON__REFSEQ:XP_986630			0	0	0	0	0	0	0	0	0	0	0	0	41070000	1190800000	170400000	67431	0	33802	0	0	48260	0	0	0	0	0	0	54422	15541000	7478400
CON__Streptavidin			66093000000	57836000000	99842000000	197150000000	227880000000	166890000000	140760000000	139550000000	119970000000	111170000000	105940000000	90844000000	66970000000	61354000000	60895000000	10681000000	9254800000	10346000000	14373000000	16347000000	16029000000	14972000000	17148000000	15532000000	10423000000	5964600000	5281100000	4642200000	5509000000	3841900000
D3YTB1;F8W727;P62910;D3YTI8	60S ribosomal protein L32	RPL32	1974300000	2123700000	1504300000	1418000000	2384700000	2322800000	2301400000	2541500000	2275700000	2603200000	3352300000	2696900000	1186600000	942840000	985870000	260300000	224960000	127610000	81717000	133940000	161280000	212700000	241090000	237460000	167280000	173680000	169190000	61472000	79596000	66910000
H0Y9L5;D6R905;D6RIY6;Q06265	Exosome complex component RRP45	EXOSC9	0	0	0	0	0	0	0	0	0	0	0	0	0	3123900	0	1403500	1329100	702920	380450	364680	0	0	812200	625710	398730	254890	242250	0	291540	0
Q13557;E9PF82;E9PBG7;D6R938;Q13554;H7BXS4;A0A2Q3DQE3;Q5SWX3;Q8WU40;Q13555;A0A5F9ZH90;A0A5F9ZHY2;E7EQE4;A0A5F9ZHM9;A0A5F9ZH21;A0A5F9ZHR5;Q9UQM7;D6RFJ0;A0A5F9ZH50;E9PBE8;H0Y6G2;H0Y9C2;H0Y9J2;E7ETC9	Calcium/calmodulin-dependent protein kinase type II subunit delta;Calcium/calmodulin-dependent protein kinase type II subunit beta;Calcium/calmodulin-dependent protein kinase type II subunit gamma;Calcium/calmodulin-dependent protein kinase type II subunit alpha	CAMK2D;CAMK2B;CAMK2G;CAMK2A	9182600	0	13591000	16711000	12520000	9056400	15233000	14319000	14998000	0	0	10059000	6634000	7315000	0	327860	0	353310	294220	256450	247020	231240	221940	452630	0	27701	111560	85605	276190	119570
D6R956;P09936;D6RE83;D6R974;D6RF53	Ubiquitin carboxyl-terminal hydrolase;Ubiquitin carboxyl-terminal hydrolase isozyme L1	UCHL1	475530000	365910000	145170000	180700000	188210000	158910000	432000000	138470000	134850000	141560000	69248000	106380000	436140000	278030000	360940000	52320000	30414000	8286200	5293600	5794100	6868100	23448000	6356500	6471800	2573700	1755800	1906200	10480000	10870000	9795600
D6R9M0		KIF2A	0	0	0	0	0	0	0	0	0	0	0	0	0	2958700	0	0	0	0	0	0	0	215720	458700	373420	116510	0	139780	146670	138060	0
D6R9P3;D6RD18;D6RBZ0;Q99729	Heterogeneous nuclear ribonucleoprotein A/B	HNRNPAB	28181000	24606000	0	0	13942000	16065000	38458000	27392000	33100000	7394700	0	5235300	18577000	17778000	17222000	2343000	1844100	156150	224430	630940	610600	2532600	1530400	1558300	195220	0	95398	792120	991840	776470
D6RBF6;D6RFG2;D6R9U8;D6RIR6;Q9BUT1	3-hydroxybutyrate dehydrogenase type 2	BDH2	0	947890	0	0	0	0	0	0	0	0	0	0	0	0	0	525340	286260	0	0	0	0	0	0	0	0	0	0	0	0	0
D6RAL9;Q9NZ08	Endoplasmic reticulum aminopeptidase 1	ERAP1	7091000	0	0	0	0	0	0	0	0	0	0	0	0	0	0	1418200	0	0	0	0	0	0	0	0	0	0	0	0	0	0
D6RD63;D6RAX7;D6RFN0;Q9BT78	COP9 signalosome complex subunit 4	COPS4	0	1733200	0	0	0	0	0	0	0	0	0	0	0	0	0	134510	87236	0	0	0	0	0	0	0	0	0	0	0	0	0
P06730;D6RBW1;H0Y8J7	Eukaryotic translation initiation factor 4E	EIF4E	0	0	0	0	0	0	0	0	0	0	0	16905000	0	0	0	1374400	2120700	725770	0	730200	247450	1773900	0	0	260820	0	534950	805170	95798	0
D6REB4;Q9H074	Polyadenylate-binding protein-interacting protein 1	PAIP1	0	0	0	0	0	0	0	0	0	0	0	0	0	0	0	0	0	0	0	0	0	0	0	0	0	0	0	0	0	0
D6RGI3;D6RER5;Q9NVA2;D6RDP1;D6R9Y6;D6RDU5;H0Y9G8;H0Y961;B1AMS2;Q14141	Septin-11	SEPT11	61481000	45458000	0	12758000	17566000	12508000	0	0	0	0	0	0	38195000	0	30580000	2757900	1700400	253440	183250	427870	286010	207490	0	59195	51393	0	0	878800	442050	611410
D6RHZ5;D6REX3;O94979;H0Y8V7;H0YAB3;H7BXG7;H0Y9T9;H0Y9K1	Protein transport protein Sec31A	SEC31A	25459000	18382000	0	0	0	0	0	0	0	0	0	0	0	0	0	680060	429130	351170	43321	0	0	0	0	0	0	0	137850	83216	194220	0
D6RFM5;P31040;H0Y8X1;A0A494C1T6;A0A087X1I3	Succinate dehydrogenase [ubiquinone] flavoprotein subunit, mitochondrial	SDHA	0	0	0	0	0	0	0	0	0	0	0	0	0	0	6660100	316990	151420	0	0	23562	26235	112920	38606	52007	0	0	0	91049	75604	91119
K7ENX8;K7ELV6;K7EJV5;K7ELT6;K7EJV1;K7EMY9;K7EPM4;K7ER40;K7EQR7;D6W5Y5;Q14011	Cold-inducible RNA-binding protein	CIRBP	0	0	3308400	0	0	0	0	0	0	0	0	0	0	0	0	1744300	787330	454050	0	0	0	0	0	0	0	0	0	0	0	0
E2QRB3;P32322;J3QR88;J3QLK9;J3QL32;J3QL24;J3QKT4;J3KQ22;J3KTA8;J3QKT3;J3QRZ0;J3QL23	Pyrroline-5-carboxylate reductase 1, mitochondrial;Pyrroline-5-carboxylate reductase	PYCR1	9986700	7692400	6492600	0	0	0	0	0	0	0	0	0	0	0	0	571660	644160	304610	0	263410	198170	502760	639530	408620	318580	0	0	0	242450	0
E5RGN3;E5RIM7;O00244	Copper transport protein ATOX1	ATOX1	22527000	18791000	16154000	0	0	0	0	0	0	0	0	0	0	0	0	5590000	4658500	2495100	0	1086000	1137700	1006800	0	769690	0	0	901350	1713800	0	0
E5RGS2;Q9H6H4	Receptor expression-enhancing protein;Receptor expression-enhancing protein 4	REEP4	0	0	22073000	0	0	0	0	0	0	0	0	0	0	0	0	550780	362160	1081900	510060	423880	574810	105370	371040	402430	90888	0	0	0	46088	0
E5RGS4;O60925	Prefoldin subunit 1	PFDN1	0	0	0	0	0	0	0	0	0	0	0	0	0	0	5213600	1511900	1178000	0	0	322630	369640	0	0	0	0	0	0	295470	444880	258570
E5RHT6;E5RHC5;F8W1U7;F8VWH9;Q8N6T3	ADP-ribosylation factor GTPase-activating protein 1	ARFGAP1	0	0	0	0	0	0	0	0	0	0	0	0	0	0	4122700	231170	239060	196920	110210	290220	103140	0	272530	157460	0	80494	111170	121840	145860	125830
E5RIW3;E5RJD8;E5RHG6;O75347;E5RIX8	Tubulin-specific chaperone A	TBCA	0	0	0	0	0	0	0	0	0	0	0	0	22430000	0	0	2871600	1834200	0	0	0	0	1343900	0	0	0	0	110420	1446700	1532500	816810
R4GMY8;E5RHG8;Q15369	Transcription elongation factor B polypeptide 1	TCEB1	42016000	22905000	0	0	0	0	23265000	13579000	0	0	0	0	0	17889000	28149000	8886100	6128600	0	0	320830	1146600	5355400	1767900	0	698980	354430	810940	1342600	2124700	4368000
O94905;E5RHW4;E5RJ09	Erlin-2	ERLIN2	0	0	0	3397700	0	0	0	4842200	18603000	0	3836900	4643700	0	3974000	0	77800	80304	39808	52316	50180	52785	314940	225310	409750	46399	52266	184550	27362	87706	26753
H0YBW4;E5RIM3;Q9Y263	Phospholipase A-2-activating protein	PLAA	0	0	0	0	0	0	0	0	0	0	0	0	0	0	2753900	242180	243310	199710	57465	86522	0	0	0	0	0	0	0	0	153200	68291
E5RJN0		HGSNAT	0	0	0	0	0	0	0	0	0	0	0	0	0	0	18495000	5621000	3339100	5021700	5052400	3568100	6654200	6329300	2333900	2251500	927470	761550	1822300	1678300	1930600	1581300
E5RJN7;E7EVI1;E7EPX0;E7EVJ4;Q9NUL3;E5RJ67;E5RFK1	Double-stranded RNA-binding protein Staufen homolog 2	STAU2	26960000	33682000	61225000	40293000	32936000	36102000	21767000	27341000	25755000	35785000	33260000	0	31919000	42982000	34452000	1747200	1719700	2568200	997460	732980	351600	359070	689450	736720	688660	694000	189900	356280	985810	768920
G3V2V8;J3KMY5;H0YIZ1;G3V3E8;E7EMS2;G3V3D1;P61916	Epididymal secretory protein E1	NPC2	0	0	0	0	0	0	0	0	0	0	0	0	0	0	11569000	0	0	0	0	0	0	625120	0	0	0	0	0	0	451580	655710
O95071;E7EMW7;H0YAV7	E3 ubiquitin-protein ligase UBR5	UBR5	0	0	0	0	0	0	0	0	0	0	0	0	0	0	17790000	0	0	104150	6862600	10196000	11328000	9384000	11491000	8253800	12238000	12300000	10661000	72931	33658	53882
K7EJL1;E7ENJ6;Q9BXS5;K7ENA7	AP-1 complex subunit mu-1	AP1M1	0	0	0	0	0	0	0	0	9105000	0	0	0	0	0	0	0	0	0	141170	107890	58688	21399	94093	304690	0	0	0	0	43403	35937
E7EV99;E7ENY0;P35611;A0A0A0MSR2;H0Y9H2;D6RF25;H0YG19	Alpha-adducin	ADD1	17760000	26101000	22982000	37747000	32524000	40633000	27037000	27017000	25682000	31067000	25452000	40567000	32754000	40702000	46145000	539160	918980	429580	644540	672130	704150	652470	746840	542110	424050	301370	539410	612800	1027400	727500
E7EWP2;E7EPJ7;O75962;A0A1W2PRD7;F5H228	Triple functional domain protein	TRIO	0	0	0	0	0	6270100	0	10030000	7432600	0	0	7267100	0	7367600	7023400	0	0	0	17055	18101	25806	16693	47005	71426	22196	11765	18726	0	33394	19104
E7ES33;E7EPK1;Q16181;G3V1Q4;A0A0U1RRH9;A0A0U1RRE1;A0A5F9ZGZ7;Q5JXL7;A0A0U1RRM2;A0A0U1RRD1;J3QRT6;J3KSZ7;A0A5F9ZHH3;Q6ZU15;O43236	Septin-7	SEPT7	97571000	80409000	60516000	69338000	60289000	66352000	63663000	45194000	55572000	56392000	49772000	66091000	95029000	78099000	82413000	5749300	2881000	1456200	1217600	1220500	1533600	1458100	985050	1626600	1024800	697200	1150300	2449700	2942700	2125200
E7EPN9;Q9Y520;H7C5N8;A0A2R8YET2;A0A2R8Y7F4;A0A0A0MS30;A0A2R8Y424;A0A1W2PQP5;Q5JSZ5	Protein PRRC2C	PRRC2C	124500000	174140000	184410000	177990000	319970000	330840000	417860000	557490000	514260000	465390000	533260000	605170000	183840000	137690000	131680000	837810	1164300	3315900	534690	2031300	1320000	2511700	3904800	3430400	2226700	1736900	1950100	541080	341040	350390
E7EPT4;P19404	NADH dehydrogenase [ubiquinone] flavoprotein 2, mitochondrial	NDUFV2	0	0	0	0	0	0	0	0	0	0	0	0	0	0	4126000	0	0	0	0	0	0	0	0	0	0	0	0	174220	254920	116930
F5GX39;E7EQ72;Q15363	Transmembrane emp24 domain-containing protein 2	TMED2	0	0	0	0	0	0	0	0	0	0	0	0	0	6656300	0	1122100	709590	0	0	0	0	494870	310100	337610	0	0	205650	483790	532460	0
E7EQG2;Q14240;J3KSN7;J3KT04;E7EMV8;C9JUF0;J3QQP0;E9PBH4;F8WE11	Eukaryotic initiation factor 4A-II;Eukaryotic initiation factor 4A-II, N-terminally processed	EIF4A2	0	0	0	0	0	0	0	331840	0	0	0	0	0	0	0	245800	86282	137290	0	0	0	0	11069	0	0	0	0	182520	0	0
E7EQR4;P15311	Ezrin	EZR	565850000	515000000	456660000	551200000	443980000	431220000	297680000	147800000	175140000	436760000	419990000	442340000	395560000	394700000	510050000	25443000	21160000	9197300	7502900	6616800	6637000	5289500	2456400	3476200	4961600	4077600	4242100	3458000	5591800	5049600
E7ERI8;E7EW49;E3W994;A0A0U1RQI6;J3KR49;O75122;B3KR06;E7ENG2;H7C5M8;C9J668;H7C4X8;D6RBU8;H7C4I5	CLIP-associating protein 2	CLASP2	24588000	28530000	91541000	49712000	29209000	10414000	0	0	16291000	26735000	41158000	32014000	27640000	51301000	36680000	347910	311920	859570	279310	129640	75307	19482	22894	117090	138720	118770	105310	77429	432370	135010
E7ERY9;Q16720;P20020;P23634	Calcium-transporting ATPase;Plasma membrane calcium-transporting ATPase 3;Plasma membrane calcium-transporting ATPase 1;Plasma membrane calcium-transporting ATPase 4	ATP2B1;ATP2B3;ATP2B4	0	3856100	0	0	0	0	0	0	0	0	0	0	0	0	0	126610	81248	0	0	0	0	0	0	0	0	0	0	0	0	0
E7ESY4;Q13330;H0Y4T7;F8W9Y9;H7C3F3	Metastasis-associated protein MTA1	MTA1	28161000	36831000	26336000	0	33035000	26609000	29748000	44503000	43187000	29590000	25240000	26342000	23470000	26784000	22706000	573680	761850	348080	160120	674640	275190	278320	1185900	884000	242790	155530	141530	113690	271040	92838
E7ETY4;E9PC69;Q7KZI7;F5H6N2;F5H4F6	Serine/threonine-protein kinase MARK2	MARK2	0	0	0	0	0	0	0	0	9875000	0	0	0	0	0	0	0	0	0	0	0	0	0	180600	182620	34214	0	0	0	0	0
E7ETZ4;Q9Y6E2;B5MCE7;B5MCH7;E9PFE3;C9JF98;F8WDX8;E7EMS9;Q75MG1;E9PFD4	Basic leucine zipper and W2 domain-containing protein 2	BZW2	23414000	12804000	0	0	21617000	0	0	0	16186000	0	0	0	0	16316000	19496000	918250	315800	27045	0	746720	14042	35804	561010	251190	9922.7	15253	0	136690	182590	183560
E7EU49		ARHGEF3	0	0	0	0	0	0	0	0	0	0	0	0	0	0	1913000	428660	302360	0	247890	220770	262060	0	0	0	0	0	231190	270300	0	29192
E7EUU4;Q04637;E7EX73;C9JF13;C9J6B6;C9K073;C9J2Z7;H7C044;H7C0V6;C9JHW9;F8WCF2;C9JIH5;C9JWH9;REV__Q8NEG2;REV__C9JQZ6;REV__J3KQX6;C9JSU8;REV__F5H7J8;C9J556;C9JWH7;C9JWW9	Eukaryotic translation initiation factor 4 gamma 1	EIF4G1	3552000000	4127200000	7544200000	7640100000	4383200000	3942600000	1878500000	1733600000	1874500000	5178300000	5617900000	4552300000	2346300000	4979300000	3609800000	51771000	54788000	78805000	46931000	29424000	27845000	14178000	15638000	17190000	34847000	29753000	21296000	12665000	43082000	20736000
E7EVA0;P27816;B5MEG9;H0Y2V1;F8W9U4;H7C456;A0A0J9YVV8;A0A0J9YW37	Microtubule-associated protein;Microtubule-associated protein 4	MAP4	841340000	794260000	920720000	1006200000	1092300000	1200100000	1395500000	2238800000	2122400000	1112700000	984160000	1172100000	517140000	566340000	602850000	6540600	5583900	4461100	3402900	3960100	5008400	6822100	13785000	12691000	3462700	3797000	3115600	1089300	2717600	1353200
G5E9S8;G3V2E7;F8W6L3;G3V3H3;G3V5R9;E7EVH7;Q07866;A8MZ87;Q9H0B6;G3V2P7;H7C4M1;E9PQ02;A8MX29;Q9NSK0	Kinesin light chain 1	KLC1	39846000	40455000	41165000	44419000	37476000	44036000	0	0	0	37429000	49730000	31982000	0	22663000	41579000	1297300	1014100	1033300	767560	421730	808010	85062	279370	228600	198360	294420	376570	120260	226980	458100
E7EVJ5;Q96F07;A0A087WVE1;A0A087WTQ3;A0A087WWZ1	Cytoplasmic FMR1-interacting protein 2	CYFIP2	0	0	0	0	0	0	0	0	0	0	0	0	0	3162600	0	67979	60283	46288	0	0	0	0	23391	47689	26130	23828	23200	15330	26832	0
E7EVZ1;Q86UP3	Zinc finger homeobox protein 4	ZFHX4	0	0	0	0	0	0	0	0	0	0	0	0	0	0	22868000	126860	82931	0	0	23216	19353	111040	23285	34791	9450	0	5200.4	51010	50025	58536
H3BVG8;F5H7K1;E7EWW0;Q7Z3J2	UPF0505 protein C16orf62	C16orf62	0	0	2392600	0	0	0	0	0	0	0	0	0	0	0	0	52987	54708	74627	0	0	0	0	0	0	0	0	0	0	0	0
E7EX17;P23588;F8VX11;F8W0K0;F8VYE9;F8VSC7;F8VP89;F8VRU1	Eukaryotic translation initiation factor 4B	EIF4B	67033000	54323000	61419000	49214000	52840000	41425000	43706000	0	0	47115000	66405000	58622000	58231000	43906000	76239000	3448600	2140200	1528800	612800	736160	775180	776980	138400	0	441010	352370	769430	1079200	1222100	1368200
E7EX44;Q05682;C9JEK3;C9JE79;F8WE61	Caldesmon	CALD1	0	0	13628000	48010000	51208000	0	0	0	0	37371000	31762000	44584000	0	0	0	685340	439760	411910	843030	1003800	923730	710000	471370	295060	616020	432930	626980	124800	196290	0
Q5JWQ4;E7EX60;Q5T7F0;Q5JWQ6;E9PEP6;O14786;H0Y4A0	Neuropilin-1	NRP1	0	5929500	0	0	0	0	0	0	0	0	0	0	0	0	0	210510	179070	0	0	0	49736	0	0	0	0	0	0	0	0	64071
E7EX90;Q14203;Q6AWB1;C9J1B7;C9JZA4;C9JTE5;C9JJN7;C9JJD0;C9JKG6;E9PCY0;E7EWF7	Dynactin subunit 1	DCTN1;DKFZp686E0752	19962000	13135000	0	9246700	0	0	0	10025000	0	0	0	0	0	11621000	0	347120	311430	40070	33835	24869	27833	0	68297	38068	64875	57500	51322	367170	109670	261800
F8VZJ2;F8W0W4;H0YHX9;Q13765;E9PAV3;F8W1N5;F8VNW4;F8VZ58;Q9BZK3	Nascent polypeptide-associated complex subunit alpha;Nascent polypeptide-associated complex subunit alpha, muscle-specific form	NACA	111890000	92585000	24793000	0	31582000	25613000	76566000	37911000	37724000	17081000	0	20261000	98188000	60731000	81950000	20001000	14205000	3061500	300120	2956300	2467900	8221000	3942500	3980400	789020	0	1315600	5865000	5179100	5348800
E9PB61;Q86V81	THO complex subunit 4	ALYREF	68211000	43757000	20701000	21809000	0	0	43464000	0	0	0	0	0	51114000	35193000	47414000	4647000	3586600	785760	417290	0	0	1349800	0	0	279380	237830	251200	961120	3107200	1075300
E9PC41;Q01638	Interleukin-1 receptor-like 1	IL1RL1	0	0	0	0	0	0	0	0	0	0	0	0	0	0	6836100	321680	485710	0	0	470110	564290	0	0	0	199260	0	155970	290680	300360	159550
E9PC44;E9PDM8;O94855	Protein transport protein Sec24D	SEC24D	0	0	6508400	0	0	0	0	0	0	0	0	0	0	0	0	339780	203680	235060	0	0	0	0	0	0	0	0	0	0	0	0
E9PC52;Q16576;Q5JP02;Q5JNZ6;C9J7L0;Q5JP01	Histone-binding protein RBBP7	RBBP7	45222000	25807000	0	0	0	21515000	28706000	18511000	16797000	0	0	15813000	39073000	23640000	35910000	3769300	2024700	0	0	410430	367840	725590	916370	336830	0	53453	245070	1123800	1082800	1143100
Q9NTJ3;E9PD53;C9JR83	Structural maintenance of chromosomes protein 4;Structural maintenance of chromosomes protein	SMC4	18951000	23941000	43214000	0	0	0	0	0	0	0	0	0	0	0	0	300420	280810	413370	163080	125350	294940	238280	0	0	78615	24178	32546	32892	147570	35572
E9PDF6;O43795;E7EQD9;A0A0U1RRI3;C9JYW1;H7C2Y7;Q9UBC5;C9JUP5;G3V342	Unconventional myosin-Ib	MYO1B	66603000	83700000	104640000	68550000	90432000	64636000	109980000	175940000	159670000	82935000	74560000	119150000	38982000	90754000	60870000	665110	713240	1243500	532850	612820	474640	1290100	2684800	2584800	572100	412440	564130	217320	862350	250160
Q96AE4;E9PEB5;C9JSZ1	Far upstream element-binding protein 1	FUBP1	31327000	28529000	0	0	23796000	0	31144000	25340000	26715000	19354000	0	23235000	43103000	34298000	34718000	2241100	1368200	0	53955	206830	99826	380990	325900	365940	97560	39293	120580	829390	575730	456980
E9PEX6;P09622	Dihydrolipoyl dehydrogenase;Dihydrolipoyl dehydrogenase, mitochondrial	DLD	0	0	0	0	0	0	0	0	0	0	0	0	0	16330000	0	276870	178230	52038	69737	90097	76417	169790	0	0	0	0	38983	314910	435440	301730
E9PF17;P13611;Q86W61;D6RGZ6	Versican core protein	VCAN	0	0	0	0	0	0	0	15589000	0	0	0	0	24399000	0	28520000	96596	116690	0	0	0	0	126890	60723	44792	0	3631.3	0	165890	75442	144000
E9PFF8;Q6NW34	Uncharacterized protein C3orf17	C3orf17	0	0	0	0	0	0	0	0	5304400	0	0	0	0	0	0	0	149730	221230	0	0	0	0	0	286740	0	0	0	0	0	0
E9PG73;Q13427;C9JT64;C9J679;C9JN15;C9JM79	Peptidyl-prolyl cis-trans isomerase G;Peptidyl-prolyl cis-trans isomerase	PPIG	13923000	12472000	0	0	0	13529000	16756000	38079000	30744000	13219000	12691000	12694000	12626000	0	0	818670	500360	0	63946	147690	291820	628910	1075300	870150	239230	255500	184220	317030	149110	0
E9PGA6;Q9BXJ4	Complement C1q tumor necrosis factor-related protein 3	C1QTNF3-AMACR;C1QTNF3	0	0	0	0	0	0	0	0	8840000	0	0	0	0	0	0	0	0	0	0	0	0	222340	320410	517680	0	0	0	0	0	0
E9PGC0;P20936	Ras GTPase-activating protein 1	RASA1	0	0	9901100	0	0	0	0	0	0	0	0	0	0	0	0	0	18984	130660	26987	0	97438	62378	0	0	27970	26338	22784	0	0	0
E9PGM1;C9J987		EIF4G1	0	0	0	0	0	0	0	0	0	0	0	7154900	0	0	0	102660	92360	87016	0	0	0	0	0	23304	71541	64507	37734	0	0	0
Q15631;E9PGT1;H7C1D4	Translin	TSN	12663000	13319000	0	0	0	0	0	0	0	0	0	0	0	0	0	978470	924270	0	0	0	0	0	110270	0	0	0	0	75602	41343	0
E9PGZ1;C9J813		CALD1	286160000	223950000	149390000	547110000	665390000	647080000	602950000	267900000	290740000	406200000	387440000	492200000	285040000	204830000	256980000	10965000	8091200	4083500	10176000	12378000	14095000	19628000	9527200	8753000	6843400	4752600	6764900	7585000	3975500	3178300
Q8NCA5;E9PH82;C9J3G8	Protein FAM98A	FAM98A	0	0	0	0	0	0	0	0	0	0	0	0	0	0	5551000	310100	0	0	29105	51910	294480	159740	169600	32342	69226	28343	75656	0	126590	95758
E9PHA2;Q15003;C9J470;H7C415;C9JZP1	Condensin complex subunit 2	NCAPH	17604000	20867000	30487000	21970000	0	0	0	0	0	0	0	0	0	0	0	592350	703090	578820	234970	0	77179	0	62385	118160	120810	49039	51211	0	67717	56922
E9PHI4;O94901;H0Y6N5;H0Y742;H7C2K3;C9JK55	SUN domain-containing protein 1	SUN1	0	0	14936000	0	0	18335000	20188000	23189000	25961000	0	0	17699000	0	16966000	0	53943	0	145410	50842	69304	146290	221010	562110	671000	105830	88873	156450	49159	205050	0
O43813;E9PHS0;F8WDS9	LanC-like protein 1	LANCL1	18297000	10825000	7413000	0	0	0	0	0	0	0	0	0	0	0	0	937250	676420	319270	0	0	0	0	0	205670	0	0	0	0	0	0
E9PHV5;P28290	Sperm-specific antigen 2	SSFA2	0	0	0	12293000	0	0	0	0	0	0	0	0	0	0	0	48656	84101	128080	78999	0	35146	0	0	0	28470	80990	0	0	92216	0
E9PHV6;P23497;C9JBL0;H7C4B4	Nuclear autoantigen Sp-100	SP100	19057000	22929000	35632000	41399000	32132000	33573000	12243000	20627000	15560000	26909000	27242000	35972000	19652000	29140000	19822000	1201300	1204000	1754800	580700	879550	887260	299380	674410	598240	397140	254430	423320	378640	712620	388880
E9PHY5;E9PK52;E9PII3;A0A2R8Y5B3;E9PQN0;E9PRG1;E9PIG0;E9PQD2;E9PJP4;E9PPC9;J3QS55		EPB41L2	0	0	0	0	0	0	0	0	0	0	0	0	0	0	13492000	279640	281650	0	98199	0	137710	197640	0	0	0	109800	0	0	67713	107060
E9PHZ2;Q9UHD1	Cysteine and histidine-rich domain-containing protein 1	CHORDC1	0	0	4697500	0	0	0	0	0	0	0	0	0	0	0	0	375780	0	402930	0	0	0	0	0	0	0	0	0	0	0	0
E9PI86;P49321;E9PPQ8;E9PRH9;H0YF33;Q5T624	Nuclear autoantigenic sperm protein	NASP	8217100	4727500	0	0	0	0	0	0	0	0	0	0	0	0	0	639090	323130	0	0	0	0	0	0	0	66210	0	0	139160	0	127530
E9PIM6;E9PNQ8;P04216;J3QRJ3	Thy-1 membrane glycoprotein	THY1	0	0	0	0	0	0	40610000	0	0	0	0	0	0	0	0	0	0	0	0	1105000	0	3588900	0	0	0	0	0	594390	618450	692940
Q9UBU9;E9PIN3;B4E227	Nuclear RNA export factor 1	NXF1	0	0	0	0	20207000	0	22070000	34028000	46675000	26538000	23914000	23331000	30210000	26393000	22476000	215050	366520	0	88080	202010	146700	446340	1283700	1128600	403620	186400	256790	270630	355980	273920
E9PJF0;E9PQW4;P27361	Mitogen-activated protein kinase;Mitogen-activated protein kinase 3	MAPK3	33007000	0	0	0	0	0	0	0	0	0	0	0	0	0	0	1737200	0	0	0	0	0	0	0	0	0	0	0	0	0	0
P29692;E9PK01;E9PRY8;A0A087X1X7;E9PMW7;E9PI39;E9PQ49;E9PPR1;E9PL12;E9PQZ1;H0YCK7;E9PIZ1;E9PL71;E9PN91;H0YE72;E9PK06;H0YE58;E9PK72;E9PQC9;E9PKK3;E9PJD0;E9PNW6	Elongation factor 1-delta	EEF1D	186680000	146320000	27294000	20785000	44387000	41520000	104220000	24893000	24759000	24924000	44014000	44013000	204690000	114640000	169210000	13346000	7561900	1097100	532640	1343600	1313200	5572200	1358900	1353500	514800	354070	226450	4981500	4121400	4064200
E9PK47;P06737	Alpha-1,4 glucan phosphorylase;Glycogen phosphorylase, liver form	PYGL	1753000	0	0	0	0	0	0	0	0	0	0	0	0	0	0	36520	0	0	0	0	0	0	0	0	0	0	0	0	0	0
E9PK85;P62070	Ras-related protein R-Ras2	RRAS2	0	13234000	0	0	0	0	0	0	0	0	0	0	0	0	0	1280700	999170	385900	168940	178620	220080	357610	0	356270	254770	110300	0	0	0	0
E9PKD5;E9PM69;R4GNH3;P17980;E9PN50;E9PMD8	26S protease regulatory subunit 6A	PSMC3	19694000	15067000	0	0	0	0	0	0	0	0	0	0	0	0	0	1122100	835930	143750	0	0	0	0	0	0	0	0	0	0	0	0
H7BXH2;E9PKF6;Q5H9R7;H0YEN2;E9PQP7	Serine/threonine-protein phosphatase 6 regulatory subunit 3	PPP6R3	0	0	2971500	0	0	0	0	0	0	0	0	0	0	0	0	0	0	47420	0	0	0	0	0	0	0	0	0	0	44125	55105
E9PKG1;Q99873;E9PQ98;E9PIX6;E9PNR9;H0YDE4;E9PMW9;Q9NR22	Protein arginine N-methyltransferase 1	PRMT1	42263000	42127000	29347000	26405000	27091000	25593000	20988000	31224000	32304000	23395000	23585000	24781000	40233000	21093000	36457000	2901500	2057500	1760000	364030	406380	416400	699810	1516900	1621900	304510	260890	283350	773140	559140	427780
E9PNX5;E9PKK8;E9PQ14;E9PPK9;G3V1D3;G3V180;Q9NY33	Dipeptidyl peptidase 3	DPP3	0	0	0	0	0	0	0	0	0	0	4991100	0	0	0	0	1614600	1047900	0	0	0	0	0	0	0	0	341950	0	0	0	0
E9PLK3;P55786;A6NEC2;E9PP11;E9PJY4;E9PJ74;E9PPD4;H0YDG0;E9PRQ5	Puromycin-sensitive aminopeptidase;Puromycin-sensitive aminopeptidase-like protein	NPEPPS;NPEPPSL1	37425000	34427000	29937000	30924000	0	25278000	0	0	0	0	17536000	0	31447000	31844000	30364000	960140	770580	574640	210590	297520	94149	0	0	33085	36279	339600	24084	150380	378060	129180
E9PPJ5;E9PLM6;P21741	Midkine	MDK	0	0	0	0	0	0	0	0	0	0	0	0	0	0	10662000	281390	280200	194820	197280	282340	307840	357920	0	0	0	0	186180	407080	406890	604300
I3L3B4;F8W9H0;E9PLN8;Q9BQB6	Vitamin K epoxide reductase complex subunit 1	VKORC1	0	0	0	44378000	0	82107000	49943000	132890000	142370000	37767000	50195000	46995000	21858000	30642000	23616000	2680000	3002300	4633800	3785300	2713300	5347300	6655400	12145000	13014000	3279600	3694900	3538300	1400400	3755000	1898900
E9PLY5		MACF1	0	0	0	0	0	0	0	0	0	0	3870300	0	0	0	0	0	63934	0	27323	0	0	16845	38432	0	14736	14105	0	0	0	0
K4DIA7;E9PMR4;P48509;E9PRJ3	Tetraspanin;CD151 antigen	CD151	23490000	0	0	43351000	36830000	48582000	33299000	34134000	30484000	58995000	60383000	60855000	34605000	0	36043000	1194200	756690	453080	1841100	1802100	2927200	2875900	1033000	3581300	2581900	2359900	2346300	615280	1587300	759940
E9PNR2;Q13671	Ras and Rab interactor 1	RIN1	0	0	0	0	0	0	0	0	0	0	0	0	0	0	2434200	72872	73851	49838	33076	0	40137	0	0	0	0	17921	0	48385	76656	37147
E9PR16;G3V198;Q12769;E9PSI3	Nuclear pore complex protein Nup160	NUP160	0	0	0	0	0	0	0	0	0	0	2345500	0	0	0	0	22663	36742	0	0	0	0	0	0	0	0	17096	441910	725480	505150	431790
E9PR30;P62861	40S ribosomal protein S30	FAU	144600000	150890000	113040000	115910000	154060000	132800000	298770000	312200000	172640000	129240000	93093000	141640000	178120000	116740000	93157000	37338000	33922000	19521000	13733000	17042000	17639000	52450000	54750000	31470000	13261000	6718800	11139000	15964000	14650000	8175800
E9PRG8;E9PLD3;A0A494BXY3	Uncharacterized protein C11orf98	C11orf98	17496000	33822000	0	0	34732000	0	68592000	100110000	28255000	60170000	79529000	142530000	0	31378000	19706000	2371300	3334300	595670	444750	3456400	1238100	6176600	5161500	5558800	6474900	7336500	7809700	504460	1172400	804490
F2Z2C0;Q9Y2L1;G3V1J5	Exosome complex exonuclease RRP44	DIS3	0	3815400	0	0	0	0	0	0	0	0	0	0	0	0	0	114340	123460	0	0	0	0	0	164550	0	0	0	0	0	0	0
F2Z2E2;Q86VI3	Ras GTPase-activating-like protein IQGAP3	IQGAP3	12576000	0	0	13220000	0	0	0	0	12773000	13272000	15502000	17303000	0	0	0	60969	38221	60672	39285	20202	0	0	20188	43381	78243	85721	109270	0	0	7695.7
F2Z2Q9;G5E9R5;P24666	Low molecular weight phosphotyrosine protein phosphatase	ACP1	0	0	0	0	0	0	0	0	0	0	0	0	2791200	0	0	0	634570	0	290030	443300	0	0	0	0	0	0	233640	216030	0	0
F2Z2Y4;O00764	Pyridoxal kinase	PDXK	3468100	2534400	0	0	0	0	0	0	0	0	0	0	0	0	0	228890	181070	0	40024	0	0	0	0	0	0	0	0	78516	0	0
F2Z2Y6;O95777;C9JNV3	U6 snRNA-associated Sm-like protein LSm8	LSM8	0	0	0	0	0	0	0	15115000	0	0	0	0	0	0	0	1615800	784650	0	0	0	0	1434600	2117500	0	0	0	0	0	0	0
F2Z3J2		PSMD5	0	0	3898700	0	0	0	0	0	0	0	0	0	0	0	0	0	638760	445890	0	0	0	0	0	0	0	0	2455100	0	0	1340400
Q9H4A3;F5GWT4;F6UYG0	Serine/threonine-protein kinase WNK1	WNK1	17073000	21982000	21183000	16919000	0	16114000	0	0	0	0	18733000	24493000	0	28111000	0	201780	187130	342350	150800	14946	105470	99737	33600	93409	66018	125480	206900	20950	220960	61839
F5H169;F5H5V4;F5GX23;J3KN29;O00233	26S proteasome non-ATPase regulatory subunit 9	PSMD9	0	0	0	0	0	0	0	0	0	0	0	0	0	0	4297200	728740	552980	187190	282500	357810	355100	372270	253780	214420	121860	0	160250	335470	355750	243570
Q13740;F5GXJ9;H7C543	CD166 antigen	ALCAM	33091000	22468000	0	0	0	0	0	0	0	0	0	0	0	0	0	1186000	603350	0	0	0	0	0	0	0	0	0	0	58003	0	64175
F5GY55;Q16531	DNA damage-binding protein 1	DDB1	6605700	0	0	0	0	0	0	0	0	0	0	0	0	0	0	129520	46267	0	0	0	0	0	0	0	0	0	0	55486	0	44105
F5GYN4;J3KR44;F5GYJ8;Q96FW1;F5H6Q1	Ubiquitin thioesterase OTUB1	OTUB1	15485000	10678000	0	0	0	0	0	0	0	0	0	0	0	0	0	1185300	749470	0	116580	0	0	0	0	0	158650	0	0	97543	0	94775
F5H3C5;F5H4R2;F5GYZ5;P04179;G8JLJ2;G5E9P6;F5GXZ9	Superoxide dismutase [Mn], mitochondrial	SOD2	0	0	0	0	0	0	0	0	0	0	0	0	0	0	8299700	0	0	0	0	0	0	0	0	0	0	0	0	292960	418330	411630
F5GZS6;J3KPF3;P08195;H0YFX4;F5H867;F5H0E2;H0YFS2	4F2 cell-surface antigen heavy chain	SLC3A2	12062000	11940000	8343300	0	0	0	15931000	0	0	0	0	0	0	0	0	463400	414490	154120	76703	69445	96385	321210	71974	100060	0	0	10990	0	43197	46693
F5H148;H3BMT1;Q9NYV6	RNA polymerase I-specific transcription initiation factor RRN3	RRN3	0	0	0	0	0	0	0	0	0	0	0	0	0	0	29860000	0	0	0	716880	678320	558120	0	0	298440	316600	0	0	334880	662660	311780
F5H2U8;F5H2A4;P52926;F5H6H0	High mobility group protein HMGI-C	HMGA2	23613000	28333000	17596000	27716000	77913000	74824000	70523000	65768000	36637000	32477000	33546000	58966000	38579000	32780000	38244000	5666000	4518600	2050000	3125300	7439400	7471900	12160000	9800500	6153900	3582400	1850300	5796400	5100800	6713500	5356200
F5H2B9;H0YNH8;Q9BZF9;H0YN48	Uveal autoantigen with coiled-coil domains and ankyrin repeats	UACA	0	0	0	0	0	0	0	0	0	0	13780000	0	0	0	0	40085	28745	29487	62702	0	16962	20333	117040	131570	15876	64665	27381	22228	27972	16910
F5H2R5;F5H6Q0;F5H3P3;P52566	Rho GDP-dissociation inhibitor 2	ARHGDIB	0	0	0	0	0	0	0	0	0	0	0	0	0	0	20201000	2998500	1951800	0	493330	0	0	1837300	506020	634600	0	0	0	1254400	0	1335800
F5H365;Q15436;G3V4V1;G3V1W4;G3V3G5;G3V2R6;Q5QPE2;A0A2R8YFH5;Q15437;G3V5X8;G3V4Q2;A0A2R8YF30;G3V5K1;A0A2R8Y633;A0A2R8Y7S7	Protein transport protein Sec23A	SEC23A	20510000	19047000	20009000	21250000	0	20771000	0	0	0	0	0	0	0	18154000	0	1017800	439610	538230	104760	168230	274200	21553	0	0	60152	84097	0	19746	84582	65447
F5H3C1;O43264	Centromere/kinetochore protein zw10 homolog	ZW10	0	0	13310000	0	0	0	0	0	0	0	0	0	0	0	0	0	1350600	1304800	0	0	0	0	0	0	0	0	0	0	0	0
F5H3Y4;Q8IY37	Probable ATP-dependent RNA helicase DHX37	DHX37	0	0	0	0	0	0	0	6319600	4970500	0	5179500	5646900	0	0	0	0	0	0	12392	0	0	9869.7	99444	73989	24363	35406	41755	0	15656	0
F5H442;Q99816	Tumor susceptibility gene 101 protein	TSG101	27880000	0	0	0	0	25585000	0	0	0	0	0	20515000	0	0	28076000	1505000	938070	698930	231010	274940	861730	160690	0	34600	187260	221960	284220	142200	680410	651300
F5H4C6;H7C3P4;F6S8M0;P15586;H0YFA9	N-acetylglucosamine-6-sulfatase	GNS	18220000	16886000	0	0	0	0	12969000	0	0	0	0	0	19056000	13954000	16796000	1263200	794530	0	0	33394	43718	575180	160730	0	0	0	0	629330	417300	615000
F8VY35;F5H4R6;P55209;F8W020;F8VXI6;F8VUX1;F8W0J6;H0YIV4;F8W118;F8VV59;F8VVB5;H0YH88;H0YHC3;F8W543;B7Z9C2;F8VRJ2	Nucleosome assembly protein 1-like 1	NAP1L1	230360000	152500000	52863000	62069000	46126000	81637000	139890000	49433000	59137000	57865000	33495000	49573000	145190000	98878000	129110000	21611000	12392000	3396800	2016800	1352600	2501400	6060500	1820100	2577100	1222800	623190	773810	4469500	6068200	3923700
H0Y8R1;F5H5I6;H0YAK1;Q12849	G-rich sequence factor 1	GRSF1	0	1634900	0	0	0	0	0	0	0	0	0	0	0	0	0	91310	70532	0	0	0	0	0	0	0	0	0	0	0	0	0
Q8NHQ9;F5H5U2;E7EX41	ATP-dependent RNA helicase DDX55	DDX55	0	0	0	0	0	0	0	12060000	0	0	0	0	0	0	0	0	0	0	13361	0	0	98907	256000	146000	44919	0	0	0	0	35082
F5H6E2;O00159;I3L3F5;I3L501;I3L3Y6	Unconventional myosin-Ic	MYO1C	341420000	292950000	391800000	419220000	422720000	386150000	484620000	806640000	794800000	469810000	458340000	461350000	253700000	439740000	264000000	6412900	4505700	4223800	3020800	3406700	2943500	5626100	11054000	10314000	3974700	2971200	4605400	1419600	4811100	1429000
H0YLF3;F5H6I0;P61769	Beta-2-microglobulin;Beta-2-microglobulin form pI 5.3	B2M	52664000	39135000	0	0	0	0	0	0	0	0	0	0	52810000	45095000	47475000	11063000	7525300	511820	0	1910400	0	3653400	1385900	1882100	0	0	602040	5594500	6793500	5291400
F5H6U7;Q9Y3E0;G3V1U5;F5GWD8;F5GXH6	Vesicle transport protein GOT1B	GOLT1B	10877000	8367900	13276000	14814000	12716000	13901000	12511000	22648000	20291000	12202000	12910000	15399000	13757000	13629000	12512000	1813000	1605700	1775100	1794200	1747400	1507600	1604300	4494600	5767400	1303800	1503000	1765600	1030400	2198600	1389000
F5H7F6;F5H6X2;P10620	Microsomal glutathione S-transferase 1	MGST1	0	0	23127000	33326000	45832000	54052000	58056000	58373000	97911000	27127000	32555000	32921000	25557000	23914000	30717000	3161600	4753000	5040500	5317900	10615000	14017000	18039000	23749000	27667000	3518200	5722000	4316600	3055600	6185700	8267300
F5H6Z0;Q00537;Q07002;D6RA44;A0A0A0MSJ6	Cyclin-dependent kinase 17	CDK17	16713000	16468000	27376000	18738000	13041000	13507000	19388000	19089000	19993000	16615000	12863000	14277000	0	0	0	539760	562710	443600	227170	161150	171920	282900	687670	830470	301020	151400	201130	0	57177	34048
F5H7V8;H3BUY0;Q7Z2W9	39S ribosomal protein L21, mitochondrial	MRPL21	0	0	0	8117400	9805000	9313000	13360000	15768000	14742000	11409000	9901200	10276000	0	7934900	7194300	0	0	0	269440	508300	615620	911970	1220700	1105800	670100	360400	449750	136570	526030	243040
F6QDS0;I3L352;I3L0H8;Q9NUU7;Q9UMR2;H3BTX1;H0YD26;A0A1B0GV69;H3BN59;E9PR46;J3QL17;H3BQK0;Q9UHL0	ATP-dependent RNA helicase DDX19A;ATP-dependent RNA helicase DDX19B	DDX19A;DDX19B	0	6681700	0	0	0	0	0	0	0	0	0	0	0	0	0	104290	224210	0	0	0	0	0	0	0	0	0	0	0	0	0
F6TLX2;I3L3Q4;Q9HC38;I3L1F4;I3L1I0	Glyoxalase domain-containing protein 4	GLOD4	21811000	12295000	8497400	0	0	0	0	0	0	0	0	0	0	0	0	658840	406030	153960	0	0	0	27581	0	0	0	0	0	30418	0	48471
F6WQW2;P43487;C9JXG8;C9JJ34;C9JGV6;Q5T0Z6;C9JDM3;Q9C010	Ran-specific GTPase-activating protein	RANBP1	77570000	37282000	0	0	0	0	30724000	0	22089000	0	0	0	42137000	32648000	50848000	5909800	2992300	0	0	273590	270720	1818100	0	507540	193550	0	0	1080600	1553000	1635300
F8VPD4;P27708;H7C3Z5;H7C2E4	CAD protein;Glutamine-dependent carbamoyl-phosphate synthase;Aspartate carbamoyltransferase;Dihydroorotase	CAD	26168000	23177000	19771000	19844000	14805000	17586000	14436000	0	0	9570800	0	0	16050000	0	17675000	404310	294090	232400	61186	30215	43700	39686	22518	40032	15264	5198.2	8477.2	47511	14153	50773
F8VQD4;Q8TAD7	Overexpressed in colon carcinoma 1 protein	C12orf75;OCC1	0	0	0	0	0	0	0	0	0	0	0	0	7583700	0	0	926750	628570	0	0	0	0	0	0	0	0	0	0	489110	0	0
F8VQE1;Q9UHB6;F8VRN8;F8VS07	LIM domain and actin-binding protein 1	LIMA1	0	0	0	18166000	0	0	0	0	0	0	0	0	0	0	0	0	165250	161300	191570	116360	0	87302	0	149000	30676	64404	104160	46344	0	51124
F8VSC5;Q6P3W7;A0A0U1RQQ9;H0YIK6	SCY1-like protein 2	SCYL2	6695000	4700500	25798000	0	0	0	0	0	12582000	0	5682000	7210500	0	29464000	11595000	258200	228330	354720	87802	168060	160180	46665	109820	115260	112830	96233	105560	93842	486330	161440
F8VTU7		CCDC38	0	0	0	0	0	0	0	0	0	0	0	0	0	0	0	0	0	0	0	0	0	0	0	0	0	0	0	0	0	0
J3KPG5;F8VU39;Q9UIF9	Bromodomain adjacent to zinc finger domain protein 2A	BAZ2A	0	0	0	0	0	0	0	0	0	0	0	0	0	2374900	0	0	0	21418	9286.9	0	15051	0	26851	24905	0	0	10486	0	20149	0
F8VU51;P49750	YLP motif-containing protein 1	YLPM1	0	0	0	0	0	0	0	0	0	0	0	0	0	0	6190300	66126	50639	58291	21164	24230	0	28120	41313	46260	22484	20582	26514	37382	76450	43858
F8W651;F8VVA7;P61923;F8VYK5;F8VXB1;F8VUC5;F8W156;F8VXR1;F8VYZ4	Coatomer subunit zeta-1	COPZ1	22339000	16731000	12342000	15922000	0	11131000	0	0	0	0	0	0	0	15269000	17044000	5018200	4181700	1906500	1616600	552520	1113900	680680	565290	494360	503700	361530	428960	566920	2291800	2004800
F8VVM2;F8VWQ0;F8VZL5;F8VWR4		SLC25A3	0	0	0	0	0	0	0	0	0	0	0	0	0	0	124110000	2760200	2919600	2924300	2821800	2733900	3926000	789110	5473100	6242700	2639300	2634500	0	1740200	4544300	2735800
Q8TAQ2;F8VXC8;F8VZW6	SWI/SNF complex subunit SMARCC2	SMARCC2	21210000	17652000	15508000	12275000	11274000	8327600	19709000	52009000	45815000	12685000	13092000	17238000	10219000	15957000	12986000	305910	197280	152180	113550	69560	38414	270720	840130	880710	110780	65512	125870	75127	190130	43111
Q99590;F8VXG7;A0A0A0MTP7	Protein SCAF11	SCAF11	30651000	38452000	25430000	32900000	60109000	64726000	83144000	89620000	72705000	56336000	61620000	56698000	45760000	33415000	28920000	330700	281100	256410	349880	432850	518830	1014800	743400	1025800	461710	344730	348500	158260	174060	130840
F8VXJ7;F8W031;Q9Y2B0;F8W1K5;H0YIH9;H0YI18;F8W1U5;F8VP03	Protein canopy homolog 2	CNPY2	16770000	0	0	0	0	0	20301000	0	0	0	0	0	17122000	11788000	19505000	1321700	578880	0	222310	269630	351780	1219900	0	0	104120	0	0	763060	752920	769150
Q9UBQ0;F8VXU5;Q05DG7	Vacuolar protein sorting-associated protein 29	VPS29	13029000	8254300	0	0	0	0	7164100	0	0	0	0	0	0	0	0	1211800	805800	0	217710	189010	0	459980	0	0	443340	453690	504000	372470	159680	274540
F8VYE8;P36873;F8VR82;F8W0W8;E7ETD8;A0A087WYY5;F5H1L6;F5H037;F8WE71;H0Y3Y6;F8W1A0	Serine/threonine-protein phosphatase;Serine/threonine-protein phosphatase PP1-gamma catalytic subunit	PPP1CC;PPP1CB	22771000	17017000	0	0	0	0	0	0	0	0	0	0	12201000	0	12783000	1438700	924270	198730	163450	127940	120160	375120	430480	414900	61779	96226	89427	298710	213480	324340
F8VYN9;P40616;F8VP99;F8VP63;B4DZG7	ADP-ribosylation factor-like protein 1	ARL1	0	4792300	22338000	0	0	0	23032000	0	0	0	0	0	16274000	18672000	14925000	1065700	672570	1265600	326590	258810	376150	1441800	513120	412740	193500	172990	123890	623940	940420	711870
H0YIC9;F8VYY9;P54619;H0YHF8	5-AMP-activated protein kinase subunit gamma-1	PRKAG1	0	0	0	0	0	0	0	0	0	0	0	0	0	0	7610200	101180	104580	62109	0	0	0	0	0	0	0	77764	134300	104780	208030	188720
F8VZQ9;P82979;H0YHG0;F8VS12	SAP domain-containing ribonucleoprotein	SARNP	71915000	46216000	20051000	0	0	0	30582000	0	0	0	0	0	38388000	28076000	0	6425100	4394800	1333400	547250	836880	75805	875030	0	425660	60221	64054	0	768650	825800	550290
F8VZX2;H3BRU6;F8W0G4;F8VXH9;F8W1G6;F8VRH0;J3QT27;E9PFP8;P57721;H3BND9;F8VTZ0;H3BSP4		PCBP2	0	0	0	0	0	0	0	0	0	0	0	0	0	0	32018000	514360	0	605450	0	0	0	0	0	0	540620	0	0	0	906920	747280
F8W038;Q8IXM2;F8W1H0;H0YIS7	Chromatin complexes subunit BAP18	C17orf49;BAP18;RNASEK-C17orf49	0	0	0	0	0	15219000	11922000	0	17710000	0	0	0	0	0	0	643020	1034800	478480	384400	431510	947040	911280	1149300	1586600	367100	226130	306030	381520	230360	154730
F8W1A4;P54819;F8VZG5;A0A5F9ZHP2;F8VY04;G3V213;F8VPP1	Adenylate kinase 2, mitochondrial;Adenylate kinase 2, mitochondrial;Adenylate kinase 2, mitochondrial, N-terminally processed	AK2	0	0	0	0	0	0	0	0	0	0	0	0	0	0	13997000	1358000	694070	112420	0	0	0	582470	0	0	76974	0	0	596980	208320	396680
F8W1F5;Q8IVF7	Formin-like protein 3	FMNL3	14424000	11871000	22661000	0	15990000	0	0	8347600	12165000	0	0	0	0	0	0	127470	110280	557110	17152	79805	56559	20013	176740	85875	25893	32260	19275	0	66534	31729
F8W1I6;Q13561;F8VW18;H0YI98;H0YHL1;F8VRV7;F8VX93	Dynactin subunit 2	DCTN2	46865000	33045000	0	19778000	21110000	23533000	21604000	14457000	0	0	0	0	43247000	27569000	0	2693300	1989700	0	365410	837480	1149200	996570	381880	100900	82625	130810	342170	1147100	658320	348550
F8W1R7;G3V1V0;P60660;J3KND3;G8JLA2;B7Z6Z4;G3V1Y7;F8VPF3;F8VZU9;F8W180;H0YI43;F8W1I5;P14649;F8VXL3	Myosin light polypeptide 6	MYL6	751880000	538970000	202510000	318350000	337260000	404110000	706670000	258930000	299760000	207980000	157950000	220560000	607510000	380770000	606270000	69304000	59217000	16572000	12764000	16979000	20494000	35037000	19463000	21820000	7989300	2831700	4857300	22597000	26252000	27556000
F8W6I7;P09651;F8VZ49;F8VTQ5;Q32P51;F8VYN5;F8W646	Heterogeneous nuclear ribonucleoprotein A1;Heterogeneous nuclear ribonucleoprotein A1, N-terminally processed;Heterogeneous nuclear ribonucleoprotein A1-like 2	HNRNPA1;HNRNPA1L2	841750000	543160000	54154000	67882000	158810000	147590000	646930000	226050000	237160000	68336000	31003000	35226000	726130000	417270000	687230000	46262000	28843000	1276000	1056300	4150500	4445500	27725000	12932000	10122000	1960000	316650	508500	16248000	14695000	16206000
F8W726;Q14157;Q5VU77;Q5VU81;Q5VU80;Q5VU79;Q5VU78;H0Y5H6;H7C2T8	Ubiquitin-associated protein 2-like	UBAP2L	44028000	31488000	47575000	25536000	28766000	34306000	0	0	0	39909000	31033000	33255000	31207000	34599000	46854000	1585200	1123100	1433900	317530	625760	851690	522840	38031	0	634150	251900	330550	613150	375510	420930
F8W7C6;A0A087WV22;H7C123;H7C2C5;Q96L21;H7C2U2		RPL10	0	0	0	0	0	0	0	0	0	0	0	0	0	0	0	0	0	0	0	0	0	0	0	0	0	0	0	0	0	0
H3BP78;F8W7R3;Q9NVI1	Fanconi anemia group I protein	FANCI	0	5544700	10136000	0	0	0	0	0	0	0	0	0	0	0	0	36392	83146	110570	0	0	0	0	0	0	12749	12029	4154.7	0	9871.2	0
F8W914;H7C106;A0A0U1RQR6	Reticulon	RTN4	0	0	0	0	0	0	0	0	0	0	0	0	0	14159000	0	0	0	0	629890	589980	557280	0	439870	636210	463410	268370	245120	0	720790	0
F8W930;Q9Y6M1	Insulin-like growth factor 2 mRNA-binding protein 2	IGF2BP2	0	0	0	0	0	0	0	9285700	0	0	0	0	0	0	0	250640	0	159380	64350	124840	151600	130610	232300	0	91398	66919	85451	97868	86744	0
F8W9J4;Q03001;E9PHM6;F6QMI7;A0A0U1RQJ2;A0A494C1D7;E7ETB9;Q5T0V7;Q6P0N6;E7ERX3	Dystonin	DST	18368000	21729000	27698000	23712000	0	21540000	0	34059000	24664000	21213000	29724000	20978000	0	19768000	0	40256	23245	25595	28869	22083	32311	3046.1	52487	58171	16841	35485	13643	5832.5	24590	20524
F8W9S7;Q14C86;B0QZ65;B4DGD8;C9IZ08;C9IZX9;A0A0A0MQV8;H0Y7I9	GTPase-activating protein and VPS9 domain-containing protein 1	GAPVD1	11442000	0	17058000	19869000	0	0	0	0	0	10799000	9941000	0	0	0	0	170510	83254	176190	176140	34815	38255	0	0	0	62055	77904	15578	0	39038	0
F8WA11;Q7Z460;H0Y5T1;C9J151;C9JP76	CLIP-associating protein 1	CLASP1	125830000	135370000	332370000	286780000	105720000	108830000	35854000	45662000	58324000	134580000	194910000	98646000	61798000	193870000	104990000	1021900	1184700	2410900	1174000	545420	432770	675340	897450	340670	808590	817290	532030	251690	1226600	362400
F8WAJ0;Q9H8H2	Probable ATP-dependent RNA helicase DDX31	DDX31	0	0	0	0	0	0	0	0	2576300	0	0	0	0	0	0	67158	51250	61959	0	0	0	0	46486	44157	0	0	0	0	0	0
F8WBE5;P02786	Transferrin receptor protein 1;Transferrin receptor protein 1, serum form	TFRC	0	0	0	0	0	0	0	0	0	0	0	0	0	0	3618500	738590	665190	0	419480	673830	551210	969350	566750	530810	417160	258980	467090	379170	529650	358920
F8WF27;F8WBG6;P30408	Transmembrane 4 L6 family member 1	TM4SF1	0	0	0	0	0	0	0	0	0	0	0	0	0	0	3713700	1835500	1415200	3903500	1885700	2629800	0	4887300	8993000	6400100	2043300	1363800	0	623750	1869400	491150
F8WBW6;Q13442	28 kDa heat- and acid-stable phosphoprotein	PDAP1	0	0	0	0	0	0	6129900	0	0	0	0	0	0	0	0	5270700	0	0	0	0	0	3792200	0	0	0	0	0	0	0	0
H7C5S7;H7C5P1;H7C5Q7;F8WC37;H7C5A0;H7C5G4;P35250	Replication factor C subunit 2	RFC2	0	5222600	0	0	0	0	0	0	0	0	0	0	0	0	0	0	4731700	0	0	0	0	0	0	0	0	0	0	0	0	0
F8WCF6;P59998;F8WDD7;H7C0A3;A0A0A6YYG9;R4GN08;F8WE39;F8WDW3	Actin-related protein 2/3 complex subunit 4	ARPC4-TTLL3;ARPC4	318220000	320190000	494910000	444030000	270720000	271200000	189970000	137880000	180350000	272610000	270700000	215340000	191700000	301070000	257770000	35023000	35611000	37533000	16245000	11185000	9508100	11799000	8399300	8608900	12212000	10208000	8763600	8439700	18693000	8800500
F8WF48;F8WCJ7;Q99442	Translocation protein SEC62	SEC62	19735000	19707000	0	0	0	0	0	41905000	26452000	0	0	0	0	19816000	0	3175400	2995500	1177100	327020	755900	49165	1754700	5103100	3535400	0	0	693720	642430	1879300	552300
F8WD88;P49450	Histone H3-like centromeric protein A	CENPA	0	0	0	0	0	0	0	0	0	0	0	0	0	0	2740600	0	1077800	449170	0	0	292820	759770	734810	590470	261800	290960	343630	161170	280490	271840
F8WDT8;G3V0G3;H7C3E9;Q9NY93	Probable ATP-dependent RNA helicase DDX56	DDX56	0	0	0	0	0	0	0	0	0	0	0	0	4418200	0	0	259300	0	251000	149770	181040	0	0	315480	266150	0	194400	140710	142480	0	0
P09496;F8WF69;C9J8P9	Clathrin light chain A	CLTA	73959000	54893000	30566000	37944000	40225000	39326000	46756000	0	0	37495000	0	42604000	74417000	54696000	82808000	11560000	7756300	3489300	2522200	2869300	3077700	3619100	566390	616200	2502700	528070	1438600	3874400	4893300	3917000
F8WF86;Q8TBC4	NEDD8-activating enzyme E1 catalytic subunit	UBA3	0	0	5421400	0	0	0	0	0	0	0	0	0	0	0	0	571370	507550	531460	0	0	0	0	0	0	0	0	0	0	0	0
F8WJN3;Q16630	Cleavage and polyadenylation specificity factor subunit 6	CPSF6	0	0	0	0	0	0	0	0	0	0	0	0	0	0	6652200	319930	235370	128210	72176	77678	86368	133370	91446	105720	80159	65953	0	165380	199020	175960
Q14444;G3V153;E9PLA9	Caprin-1	CAPRIN1	73364000	51741000	72566000	22811000	20683000	18955000	16169000	0	0	38685000	27687000	39796000	64839000	47087000	62096000	3478100	2308800	2549500	244930	354550	385630	335050	97620	74442	714500	466490	571240	1765200	1100700	1111000
Q9UGN5;G3V167;E9PJ27	Poly [ADP-ribose] polymerase 2	PARP2	0	0	0	4285900	0	0	0	8094400	0	0	0	0	0	0	0	0	0	0	71519	0	23520	51456	187910	46520	0	0	69043	38272	0	40723
G3V1C3;Q9BZZ5;H0YER7;E9PQK6	Apoptosis inhibitor 5	API5	139560000	181450000	129870000	127620000	123980000	131890000	226500000	200710000	222720000	208890000	256470000	225130000	124880000	184980000	140340000	6368600	6982900	2717400	2249300	3077700	2891600	6762700	5602900	5634500	3372300	2967100	3168300	1408400	4111300	1999500
G3V3D2;G3V5V8;G3V5H6;G3V2V4;G3V287;G3V4A9;G3V2E1;Q9P0W8	Spermatogenesis-associated protein 7	SPATA7	0	0	0	0	0	0	0	0	0	27772000	0	0	0	0	0	0	4465200	6322200	0	0	0	0	0	0	3800900	0	0	0	0	0
G3V295;G3V5Z7;P60900;G3V3I1;G3V3U4;G3V4S5;G3V2S7	Proteasome subunit alpha type;Proteasome subunit alpha type-6	PSMA6	71041000	66018000	0	0	0	0	44830000	0	0	0	0	0	74727000	37655000	64398000	4365500	3682600	241260	107160	241200	242120	1194500	230400	0	120490	0	88804	2247800	1448300	2045300
G3V2Q1;P07910;G3V576;G3V555;G3V575	Heterogeneous nuclear ribonucleoproteins C1/C2	HNRNPC	0	0	0	0	0	0	0	0	0	0	0	0	0	0	13842000	792340	703270	579220	0	0	0	73874	440640	216290	482420	353200	282870	174360	464830	323050
G3V4P8;P60983	Glia maturation factor beta	GMFB	0	0	0	0	0	0	0	0	0	0	0	0	0	0	20428000	568450	725440	0	132610	175340	0	0	0	0	0	797710	556230	868680	0	810500
G3V529;Q9GZR7;F5GYL3;A0A1W2PRR2;A0A087WXU8	ATP-dependent RNA helicase DDX24	DDX24	52076000	61935000	80327000	54756000	61155000	59922000	58213000	95230000	84057000	61136000	64196000	63305000	57171000	60978000	47500000	968290	1173000	1165700	413500	521710	702560	839790	1896000	1379700	628140	494340	564580	577620	933830	425920
J3KMW2;G3V5I2;Q9UEU0	Vesicle transport through interaction with t-SNAREs homolog 1B	VTI1B	0	0	0	0	0	0	34152000	44667000	0	0	0	0	0	0	0	2269200	0	0	0	772840	962550	7051100	10420000	4857600	2164600	0	0	0	942720	0
G3XAN4;Q15629	Translocating chain-associated membrane protein 1	TRAM1	0	0	0	0	0	0	0	0	0	0	0	0	0	3223900	0	0	0	0	0	0	0	313850	0	0	0	0	0	0	164110	0
G5E9Q6;C9J0J7;C9JQ45	Profilin	PFN2	0	0	0	0	0	0	0	0	0	0	0	0	0	0	11386000	2184600	1642500	884260	490070	505580	567680	540080	403440	270410	192680	185240	163650	389020	409850	451740
G5E9Z2;Q96KA5	Cleft lip and palate transmembrane protein 1-like protein	CLPTM1L	0	0	0	0	0	0	0	0	0	0	0	0	0	0	933250	0	0	0	0	0	0	0	0	52065	0	0	53935	0	0	20571
G5EA09;O00560	Syntenin-1	SDCBP	0	0	0	0	0	0	0	0	0	0	0	0	0	0	3052000	0	0	0	0	0	0	0	0	0	0	0	0	148290	181960	100910
G5EA31;P53992	Protein transport protein Sec24C	SEC24C	30676000	21254000	31897000	33947000	26980000	22269000	15532000	0	0	23723000	21559000	24199000	27335000	28223000	25667000	942500	586960	432640	328160	201420	254580	199370	1156500	1032400	260040	193670	263380	332180	509750	299300
P31943;G8JLB6;E9PCY7;D6RBM0;D6RIU0;D6RFM3;D6RIT2;E7EQJ0;D6RAM1;H0YB39;D6RIH9;D6RJ04;D6RDU3;D6R9T0;E5RGV0;E7EN40;D6RDL0;E5RGH4;H0YBG7;H0YBD7;P55795;D6RF17;D6R9D3;H0YAQ2;E5RJ94	Heterogeneous nuclear ribonucleoprotein H;Heterogeneous nuclear ribonucleoprotein H, N-terminally processed	HNRNPH1	211280000	165520000	80634000	154370000	138910000	137340000	172200000	119520000	116850000	97397000	101140000	123230000	260980000	179700000	227080000	15056000	10747000	3575100	2316400	2783100	2853100	5273500	3195000	2896200	2162400	1795300	2125100	6128600	6721000	6256700
Q2L6G8;G8JLG2;Q15517	Corneodesmosin	CDSN	0	0	0	0	0	0	0	0	0	0	0	0	0	0	8219500	0	328240	0	0	164950	261400	0	0	0	203950	186370	118390	193720	177930	217410
M0QYT5;G8JLK1;Q9NZ43	Vesicle transport protein USE1	USE1	0	0	0	0	0	0	0	0	0	0	0	0	0	0	0	0	0	0	0	0	0	0	0	0	0	0	0	0	0	0
H0YD13;H0Y2P0;P16070;H0YE40;H0YDX6;H0YD17;H0YDW7;H0YCV9;H0Y5E4;E9PKC6	CD44 antigen	CD44	175800000	115320000	31452000	0	51241000	0	84861000	47609000	49497000	54586000	45865000	39343000	126370000	69493000	121810000	12324000	8114400	2116300	594770	1463400	1162700	4631700	1708400	2714400	1539800	1105800	690620	4415800	3609500	3895100
H0Y2X5;P47895;H0YNQ3;H0YKF9	Aldehyde dehydrogenase family 1 member A3	ALDH1A3	31474000	27128000	34102000	0	0	0	22316000	0	0	0	0	0	0	0	0	1815000	1104600	1290900	529690	646140	633390	704130	662890	498080	306670	288950	324330	285390	413750	305540
Q5QPK2;H0Y368;O60762;Q5QPJ9	Dolichol-phosphate mannosyltransferase subunit 1	DPM1	0	7556900	0	0	0	0	0	0	0	0	0	0	0	0	0	235330	427910	196570	0	104970	103320	157520	0	0	78552	74422	97857	85134	176990	89690
P12268;H0Y4R1;E7ETK5	Inosine-5-monophosphate dehydrogenase 2	IMPDH2	107270000	54382000	36176000	22702000	23713000	22796000	34421000	16237000	16818000	11460000	0	13330000	49151000	36295000	43040000	4553400	3721000	1149300	304430	328410	460730	986920	371070	740820	169160	52766	194300	605280	784400	929320
H0Y4Y4;Q96C19;C9JTV4;Q8WYH2;A0A087X1Z2;Q9BUP0	EF-hand domain-containing protein D2	EFHD2	33120000	28451000	0	7320400	0	0	14497000	8889000	8373900	0	0	0	0	10090000	0	2922500	2246600	666090	434070	126760	163000	1390000	807920	648800	335670	36886	356100	614650	853110	829080
H0YA83;Q5URX0;P07686;H0Y9B6	Beta-hexosaminidase subunit beta;Beta-hexosaminidase subunit beta chain B;Beta-hexosaminidase subunit beta chain A	HEXB	0	8046200	0	0	0	0	0	0	0	0	0	0	0	0	0	876570	662720	0	0	0	0	0	0	0	0	0	0	273680	246480	212910
H0YAZ4		CNGB3	0	0	0	0	0	0	0	0	0	0	0	0	45581000	0	0	0	0	0	7753200	7944900	0	18442000	0	0	0	4948400	0	2939800	0	0
H0YER1;H0YCN2;Q96T23	Remodeling and spacing factor 1	RSF1	0	0	0	0	0	0	0	0	0	0	0	0	0	3789000	0	0	0	0	0	39442	0	0	0	0	0	0	0	0	54402	0
I3L252;H0YCY6;Q3LXA3	Bifunctional ATP-dependent dihydroxyacetone kinase/FAD-AMP lyase (cyclizing);ATP-dependent dihydroxyacetone kinase;FAD-AMP lyase (cyclizing)	TKFC;DAK	23442000	0	0	0	0	0	0	0	0	0	17869000	0	0	19283000	19238000	1509700	300180	835780	138570	0	0	1821000	0	1273200	84089	495090	239750	943570	774940	540940
H0YE57;Q9UBM7	7-dehydrocholesterol reductase	DHCR7	8434400	0	12141000	9501400	8405700	13237000	0	22128000	19066000	9299300	0	11776000	0	0	0	2015300	1271300	2029600	1121400	906360	1792200	823610	3644900	3132600	959360	0	1128300	0	845640	0
H0YFA4;P52943	Cysteine-rich protein 2	CRIP2	0	0	0	0	0	0	0	0	0	0	4267600	0	0	0	0	358220	281820	241900	0	362470	0	0	0	0	0	162440	0	0	0	0
H0YFD6;P40939;A0A2R8Y4F5;A0A2R8YG21;A0A2R8Y688	Trifunctional enzyme subunit alpha, mitochondrial;Long-chain enoyl-CoA hydratase;Long chain 3-hydroxyacyl-CoA dehydrogenase	HADHA	189170000	175210000	156210000	119300000	83275000	31385000	33182000	62220000	75037000	103040000	105630000	86317000	115870000	234180000	162980000	4421800	3694200	3017700	765250	358480	502060	394470	922870	1231100	1071600	903920	854530	1330100	3312100	1849400
H0YG54;H0YGR4;Q9Y3B8	Oligoribonuclease, mitochondrial	REXO2	3999900	0	0	0	0	0	0	0	0	0	0	0	0	0	0	399990	195540	71918	0	0	0	59598	0	0	0	0	112000	0	0	0
H0YIB4;Q13242;S4R3G0	Serine/arginine-rich splicing factor 9	SRSF9	20458000	0	0	0	0	0	19812000	0	0	0	0	0	0	0	22805000	2884500	1185100	0	0	221120	589450	1796100	1031000	174530	0	0	0	651330	538980	831830
H0YJ75;Q13362;Q96B13;H0YN84;Q16537;H0YJZ3	Serine/threonine-protein phosphatase 2A 56 kDa regulatory subunit gamma isoform	PPP2R5C	0	0	14141000	0	0	0	0	0	0	0	0	0	0	0	0	99665	78990	388140	0	0	0	0	0	0	0	0	0	0	0	0
H0YK42;Q13596;O60749	Sorting nexin-1;Sorting nexin-2	SNX1;SNX2	10736000	0	0	0	0	0	0	0	0	0	0	0	28344000	0	0	565080	0	190160	0	0	0	0	0	0	0	0	0	789550	130250	116700
Q5SZE2;Q5SZE3;H0YKH6;Q5SZE4;Q5SZE1;Q96G23;H0YNU7	Ceramide synthase 2	CERS2	0	0	0	10353000	10127000	0	0	16610000	41761000	11679000	0	0	0	0	0	7655800	8000700	4338400	476960	539390	395260	329160	2639600	3482200	761360	101600	232960	0	0	128520
H0YKX5		TPM1	0	0	0	0	0	0	0	0	0	0	0	0	0	23078000	0	4853900	3190200	501610	0	0	0	3718000	0	0	0	0	0	0	1174800	0
H0YMZ1;H0YN18;H0YL69;P25789;H0YKT8;H0YMA1;H0YKS0;H0YLC2;H0YMI6;H0YMV3;H0YLS6	Proteasome subunit alpha type;Proteasome subunit alpha type-4;Proteasome subunit beta type	PSMA4	0	0	0	0	0	0	28027000	0	0	18486000	0	0	52983000	31338000	0	3144500	2199000	0	0	211670	628100	1684900	0	593380	567810	140650	176430	1816600	1732100	965870
H0YLC7;P16930	Fumarylacetoacetase	FAH	7689700	6625100	0	0	0	0	0	0	0	0	0	0	9722000	6544500	7583300	896090	627100	54737	0	18164	78182	195800	0	0	0	0	0	604610	380770	372920
H0YMV8;Q71UM5;C9JLI6;C9J1C5	40S ribosomal protein S27;40S ribosomal protein S27-like	RPS27L	93720000	88936000	80090000	71778000	74580000	65680000	85220000	112670000	100510000	71128000	72633000	77283000	63791000	74525000	60236000	16846000	14253000	10678000	5884000	6786300	6370400	11020000	18968000	15881000	5424500	5035200	5547800	4477100	8315000	4244300
H0YN26;P39687;O43423;O95626	Acidic leucine-rich nuclear phosphoprotein 32 family member A	ANP32A	35092000	34589000	30474000	18233000	0	0	0	17567000	0	24839000	23221000	28279000	77118000	48927000	45360000	7269700	5370700	2149700	1613600	261450	565520	2472800	842260	608030	586640	434130	635540	2554200	2617000	2135100
H0YNX5;H0YNA5;H0YNG3;P67812	Signal peptidase complex catalytic subunit SEC11;Signal peptidase I;Signal peptidase complex catalytic subunit SEC11A	SEC11A	0	0	0	0	0	0	0	0	0	0	0	0	0	0	5926300	1342000	1107600	663050	488390	558100	638080	708230	920180	1182900	404850	451600	425840	362180	0	391890
H3BLV9;Q96SB4;H7C2I2;D6RBF8;D6RBM8;H7C521;H7C5L6;A8MPP7;A8MPY5;E7ETV6;Q9UPE1;P78362	SRSF protein kinase 1	SRPK1	13467000	21385000	19999000	20451000	13791000	16781000	11913000	40466000	27947000	13926000	15989000	19976000	0	0	0	408650	800900	500980	396480	199810	181930	98137	914250	526360	164560	271280	329170	0	75214	66201
H3BNE1;H3BR18;H3BM38;H3BPJ0;O00161	Synaptosomal-associated protein;Synaptosomal-associated protein 23	SNAP23	0	0	0	0	0	4410200	0	0	0	0	0	0	0	0	0	636950	0	0	253560	0	318110	0	0	0	0	0	0	0	0	0
H3BM42;Q92896	Golgi apparatus protein 1	GLG1	0	0	0	0	0	0	0	0	0	0	0	0	0	0	2213000	100300	57138	0	0	0	0	0	0	0	0	0	0	36492	0	22514
H3BMH2;H3BSC1;P62491;Q15907;B4DQU5;M0R377;M0R2D0;H3BN38;P57735	Ras-related protein Rab-11A;Ras-related protein Rab-11B	RAB11A;RAB11B	56613000	62966000	0	0	0	0	0	0	0	25833000	0	0	67122000	47466000	59776000	6043900	5403400	0	195610	232180	163660	0	0	0	1020900	91528	86803	2091200	1103700	1896100
H3BV80;H3BMS0;H3BMM9;H3BTC0;Q15287;H3BPG5	RNA-binding protein with serine-rich domain 1	RNPS1	18821000	19550000	0	0	0	27426000	19248000	0	20871000	29661000	27908000	0	0	14760000	0	1820600	1937800	416670	697980	1054400	2130700	1267100	935540	1723800	1258500	977900	681890	428260	674420	593350
H3BMQ2;Q9UHA3	Probable ribosome biogenesis protein RLP24	RSL24D1	0	0	0	0	0	0	0	14490000	0	0	0	0	0	0	0	0	2586800	0	0	0	0	0	5075100	0	0	0	0	0	0	0
H3BQF7;H3BMU1;H3BUI0;J3KR23;P53990;F5GXM3	IST1 homolog	IST1	0	13300000	0	0	0	0	0	0	0	0	0	0	0	0	0	2896600	1338900	618710	191600	193830	0	0	315390	0	157520	180700	198070	1022800	1005000	375800
H3BNC9;P08708;H0YN88;A0A075B716;H0YN73;A0A0J9YYC4	40S ribosomal protein S17	RPS17	141480000	139080000	79066000	125600000	202320000	238550000	383430000	311320000	397130000	223180000	212650000	191670000	148100000	107410000	132660000	5468400	4861100	1504800	2204100	3464500	4532100	9654000	9819000	12000000	4277200	3129200	3054200	1299100	2276200	1530700
H3BND4;Q6P996;Q6XYB5;J3KNK7;Q86XE2;Q6P474	Pyridoxal-dependent decarboxylase domain-containing protein 1;Putative pyridoxal-dependent decarboxylase domain-containing protein 2	PDXDC1;PDXDC2P	0	0	3357500	0	0	0	0	0	0	0	0	0	0	0	0	76902	93769	59076	0	0	0	0	0	0	0	15900	0	0	40003	0
H3BNX8;P20674;H3BRM5;H3BV69;H3BRI0	Cytochrome c oxidase subunit 5A, mitochondrial	COX5A	0	0	0	0	0	0	21504000	0	0	0	0	0	24869000	0	0	3066500	1362600	525180	205770	191460	218030	969830	235990	211830	315570	187020	166390	888800	660630	398020
H3BPE1;H3BQK9;A0A5F9ZGX0;H0Y314;H0Y4F5		MACF1	165520000	183980000	345460000	311860000	237440000	239080000	187740000	311880000	325730000	254980000	275970000	278840000	159650000	214440000	242350000	447960	514090	691130	287610	173280	250560	169940	649380	661540	269540	209690	231580	83106	267610	142130
H3BPZ1;H3BS72;Q9P035;H3BRL8;H3BMZ1	Very-long-chain (3R)-3-hydroxyacyl-CoA dehydratase 3	HACD3	26423000	27287000	39512000	31904000	30705000	35292000	47257000	85832000	101680000	37136000	44966000	47357000	24125000	45087000	28141000	1590600	1292900	1802200	890690	1224500	1428100	1999700	4677000	4883500	1160100	1357600	1440100	669550	1917900	884120
H3BQF1;P07741;H3BSW3;H3BQZ9;H3BQB1	Adenine phosphoribosyltransferase	APRT	10676000	0	0	0	0	0	0	0	0	0	0	0	0	0	0	970560	389760	0	0	425960	366030	112200	0	0	121210	0	97859	61904	77100	529660
H3BQI7;H3BT52;Q3SXM5;H3BNH5	Inactive hydroxysteroid dehydrogenase-like protein 1	HSDL1	0	0	0	0	0	0	0	0	11386000	0	0	0	0	0	0	0	0	604170	163270	436310	0	0	1089500	1333500	0	290380	287680	0	514100	0
H3BQZ7;Q1KMD3	Heterogeneous nuclear ribonucleoprotein U-like protein 2	HNRNPUL2-BSCL2;HNRNPUL2	20364000	13358000	19855000	19311000	23937000	23068000	43467000	28403000	49066000	22715000	19623000	21188000	34753000	0	22363000	546020	408790	244030	177270	257940	516380	667740	1028800	1389200	163300	163790	185260	273040	282240	245810
H3BR35;P15170	Eukaryotic peptide chain release factor GTP-binding subunit ERF3A	GSPT1	0	0	0	0	0	0	0	0	0	0	0	0	0	0	7306800	281160	131750	0	0	0	115230	0	0	0	0	0	0	0	101420	115960
H3BRB3;Q14807	Kinesin-like protein;Kinesin-like protein KIF22	KIF22	0	0	0	0	0	0	0	0	0	0	0	2306900	0	0	0	0	0	0	35163	43545	0	0	95393	88034	0	0	23618	0	0	0
H3BRG4;P22695;H3BSJ9;H3BP04;H3BUE4;H3BUI9;A0A087WVZ4	Cytochrome b-c1 complex subunit 2, mitochondrial	UQCRC2	56198000	40620000	37639000	0	0	0	0	0	0	19740000	19442000	0	42236000	79496000	59945000	3616800	3414800	2411800	125250	0	0	95283	0	0	288580	237890	102490	427880	1796300	828990
H3BTN5;H3BQ34;H3BUW1;H3BTJ2;H3BT25;H3BU13;H3BN34;H3BQZ3;P30613	Pyruvate kinase	PKM	36125000	19587000	17649000	0	0	0	18058000	16236000	18608000	11393000	9147300	0	13320000	16924000	16602000	868080	736160	383020	133880	162080	135480	378050	381930	544810	124620	88932	61435	195220	332410	256810
H3BUF6;Q8WWM7;H3BSK9;H3BRB0;A0A0C4DGL7	Ataxin-2-like protein	ATXN2L	0	0	9935000	0	0	0	0	0	0	0	0	0	0	0	0	206300	103340	179410	48121	34622	0	0	0	0	0	0	0	0	74670	56162
H7BXY3;Q7L2E3	Putative ATP-dependent RNA helicase DHX30	DHX30	3155700	3243800	3483700	3600200	0	0	0	0	0	3722900	4238800	3626700	0	7233400	3768900	37984	35370	31728	19648	0	9753.1	12237	20588	20394	21148	25377	17117	7922.4	48758	21670
H7BYH4;P00441	Superoxide dismutase [Cu-Zn]	SOD1	0	0	0	0	0	0	49837000	0	0	0	0	0	0	0	0	1587900	1019300	0	198640	357780	492190	4404400	611550	760690	0	153160	177280	774410	962700	950260
H7BYK2;Q8IUZ5	5-phosphohydroxy-L-lysine phospho-lyase	PHYKPL	0	0	0	0	0	0	0	0	0	0	0	0	0	0	0	0	0	0	0	0	0	0	0	0	0	0	0	0	0	0
H7BYN4;Q02241;A0A2U3TZL8;A0A2R8Y531;H0YME6;H0YMJ4	Kinesin-like protein;Kinesin-like protein KIF23	KIF23	0	0	0	26910000	29559000	30064000	43223000	49330000	65047000	34072000	25871000	27358000	0	0	0	414370	359420	217040	217200	269910	257950	383520	835010	986150	264120	183350	255130	0	0	0
H7BYY1;F5H7S3;B7Z596;H0YL42		TPM1	0	0	0	0	0	0	0	0	0	0	0	0	44360000	0	0	3383900	2245200	0	0	845480	768280	0	0	0	276860	154350	575540	1144400	807450	733300
P23919;H7BZ20;H7C312	Thymidylate kinase	DTYMK	0	17177000	0	0	0	0	0	0	0	0	0	0	0	0	0	830180	915430	0	0	0	727880	0	0	0	0	41798	0	0	0	0
H7BZJ3		PDIA3	0	0	0	0	0	0	0	0	0	0	0	0	0	0	36396000	4289400	3067100	652250	664230	1010800	1024600	2556800	1523600	1311200	445340	0	505430	1617400	1814800	1604500
O00422;H7BZW6;U3KPY7	Histone deacetylase complex subunit SAP18	SAP18	20569000	20140000	11118000	21177000	34697000	34948000	44854000	15829000	24468000	21098000	0	0	0	22860000	23851000	1877600	2331600	446610	731780	1876400	2214000	1846400	660530	613780	903080	191620	162180	723390	1009100	1050000
H7C4B9;H7BZY3;J3KN13;Q9P1T7	MyoD family inhibitor domain-containing protein	MDFIC	0	0	0	0	0	0	0	0	3091300	0	0	0	0	0	0	0	0	0	72514	0	0	169880	288900	241380	0	0	0	0	0	0
H7C0Q6;Q9C037	E3 ubiquitin-protein ligase TRIM4	TRIM4	0	0	0	0	0	0	0	0	0	0	0	0	0	40695000	0	15664000	13359000	6529500	0	0	0	0	13390000	15140000	3689500	0	1548900	0	1899000	0
H7C0R7;Q9UHQ9	NADH-cytochrome b5 reductase 1	CYB5R1	0	0	5024100	0	0	0	0	0	0	0	0	0	0	0	0	0	120420	265200	0	0	0	0	0	0	0	0	0	0	0	0
H7C109;Q6P158	Putative ATP-dependent RNA helicase DHX57	DHX57	0	0	0	0	0	0	0	0	0	6504400	0	0	0	0	0	0	0	0	21211	0	0	54998	233860	141930	70278	32666	0	15871	57769	0
H7C1V1;Q9Y6X9	MORC family CW-type zinc finger protein 2	MORC2	0	0	0	0	0	0	0	0	4751900	0	0	0	0	0	0	0	0	0	0	0	0	0	528090	477040	0	0	0	0	0	0
H7C2Q8;Q99848	Probable rRNA-processing protein EBP2	EBNA1BP2	48835000	36203000	48271000	39415000	90031000	104230000	143090000	205430000	250000000	170210000	187740000	141080000	47394000	36510000	29888000	412160	1092800	619970	1440200	3339600	2473300	7889500	6946900	7100800	3661000	2931200	4064600	477680	271150	476910
H7C3I1;P50502;Q8IZP2;Q8NFI4;F6VDH7;Q3KNR6	Hsc70-interacting protein;Putative protein FAM10A4;Putative protein FAM10A5	ST13;ST13P4;ST13P5	0	0	0	0	0	0	16516000	0	0	0	0	0	23863000	0	21918000	1847300	819820	0	0	0	412880	2134800	0	1493000	0	0	0	1774000	305010	931570
H7C4C5	Microtubule-associated protein	MAP4	0	0	0	0	0	0	0	0	12108000	0	0	0	0	0	0	159820	177340	197970	0	98502	0	175700	276210	315130	0	0	0	0	0	0
I3L0A0;Q13404;E5RIF1;D6RG00;G3V2F7;H0YBX6;A0A0A0MSL3;G3V113	Ubiquitin-conjugating enzyme E2 variant 1	TMEM189-UBE2V1;UBE2V1;UBE2V2	42193000	31614000	0	25305000	0	0	30939000	0	0	0	0	0	26512000	0	0	1951400	1529100	328520	438970	468380	0	1273300	477370	342150	240130	152220	140820	748110	453800	439180
I3L0K2;I3L3M7;Q9BRA2	Thioredoxin domain-containing protein 17	TXNDC17	0	0	0	0	0	0	8505000	0	0	0	0	0	10123000	0	0	1364500	794260	0	0	0	0	1114000	0	0	0	0	0	744870	430960	307170
I3L2C7;P57678	Gem-associated protein 4	GEMIN4	0	0	0	5095900	0	0	4548600	0	6578300	0	5664400	0	0	0	0	0	0	0	41795	32689	35957	47476	87573	78715	12227	39375	20017	0	14202	0
I3L305;Q9UNK0	Syntaxin-8	STX8	0	0	0	0	0	0	0	15921000	15445000	0	0	0	0	0	0	331470	343480	299100	0	0	0	1088600	1833900	1833800	0	261930	0	302410	0	0
I3L397;I3L504;P63241;Q6IS14;F8WCJ1;C9J7B5;C9J4W5;Q9GZV4	Eukaryotic translation initiation factor 5A;Eukaryotic translation initiation factor 5A-1;Eukaryotic translation initiation factor 5A-1-like	EIF5A;EIF5AL1	421730000	283520000	114980000	183910000	222820000	201170000	346980000	144600000	130780000	125690000	88731000	149660000	278990000	187620000	246080000	61596000	38763000	9938400	6994000	12095000	10301000	35246000	12106000	8253200	5984300	3082900	4725900	13202000	9757500	13149000
I3L3H2;P38919	Eukaryotic initiation factor 4A-III;Eukaryotic initiation factor 4A-III, N-terminally processed	EIF4A3	25299000	18149000	18216000	0	0	0	0	0	0	0	0	0	0	0	34791000	1794300	1247300	239440	26329	100300	164970	163710	197650	0	50414	33024	16903	178580	258150	617630
I3L3X5;Q9NRY6;I3L161;I3NI29	Phospholipid scramblase 3	TMEM256-PLSCR3;PLSCR3	0	0	0	0	0	0	9946800	17134000	15148000	0	0	0	0	0	0	0	0	0	0	0	0	507070	1493900	892900	0	0	159680	0	0	70813
Q5VYK3;J3KN16;R4GMY1	Proteasome-associated protein ECM29 homolog	ECM29;KIAA0368	10374000	9766300	16032000	11929000	4624900	5051800	6852600	0	0	4537800	7366000	0	4154200	8592600	12452000	158870	113280	176340	35379	18016	30776	56722	12729	5072.8	16298	43012	28159	16024	53462	35489
J3KN67;A0A2R2Y2Q3;A0A494C034		TPM3	0	0	0	0	0	0	0	0	0	0	0	0	0	3564500	0	420170	272110	0	0	0	0	113990	0	0	75000	0	0	104500	117410	0
J3QL05;J3KP15;Q01130;Q9BRL6	Serine/arginine-rich splicing factor 2;Serine/arginine-rich splicing factor 8	SRSF2;SRSF8	80251000	0	6718400	0	10147000	8618900	17681000	0	9881100	0	8403700	0	0	0	0	10677000	1036400	518390	45419	728150	529560	3990000	301040	1061600	63839	535070	0	1101900	610920	536400
J3KPM9;P42224;E7ENM1;E7EPD2;D2KFR9;E9PH66	Signal transducer and activator of transcription;Signal transducer and activator of transcription 1-alpha/beta	STAT1	0	0	0	7447900	0	0	0	0	0	0	0	0	0	8805300	0	82560	96352	0	92422	46134	16554	8793.6	12687	55470	54682	0	27395	70194	120140	69855
J3KPP4;O95232;D6RDI2;D6RHH0;U3KQT3;H0YA81	Luc7-like protein 3	LUC7L3	26092000	29424000	36096000	43731000	46383000	40060000	47409000	40310000	50460000	51515000	58617000	41016000	0	0	25072000	1068000	1158300	993000	809630	1259100	1178400	1123800	1625500	2110300	1335100	669160	684950	0	245840	296280
J3KPX7;Q99623;F5GY37;F5GWA7;F5H3X6;F5H0C5;F5H2D2;U3KPZ5	Prohibitin-2	PHB2	470360000	511820000	632270000	503350000	444030000	430290000	354010000	424550000	534510000	455370000	541070000	534400000	444370000	643520000	514330000	23148000	25521000	20816000	8843900	9157500	9886200	11016000	13846000	17773000	8671900	8449600	8551600	8179400	18235000	10089000
J3KQ18;P30046;B5MC82;A6NHG4;H7C342	D-dopachrome decarboxylase;D-dopachrome decarboxylase-like protein	DDT;DDTL	27817000	28656000	0	0	0	0	19348000	0	0	0	0	0	23480000	0	0	4879400	3632300	0	0	0	0	2183600	0	267010	0	0	0	684030	415710	457500
J3KQ32;Q9NTK5;C9JTK6;C9JCJ9	Obg-like ATPase 1	OLA1	83613000	59979000	52421000	43158000	27416000	38838000	44457000	34290000	47213000	26820000	25083000	33803000	51399000	45642000	50987000	3203300	2299000	945230	552140	463130	594990	818270	816690	1396000	237430	359140	413150	1011900	1038600	876890
J3KQA0;P21579;Q8N9I0	Synaptotagmin-1	SYT1	27375000	17522000	16738000	25133000	23134000	0	38777000	41020000	50756000	19321000	24454000	0	21607000	34898000	16043000	1156700	792460	474980	477450	599640	141720	1192600	1277300	1795200	475310	218080	169780	539570	1142700	432620
J3KQL8;Q9BQE5	Apolipoprotein L2	APOL2	0	0	0	0	0	0	0	0	0	0	0	0	0	0	4786500	0	0	0	52596	0	29132	0	0	0	0	0	0	111610	139820	82571
J3KR72;P49848	Transcription initiation factor TFIID subunit 6	TAF6	0	0	0	0	0	0	0	0	0	0	2791300	0	0	0	0	0	56458	63035	0	0	0	0	0	0	0	23322	0	0	0	0
J3KS31;J3QRS9;X6R4W8;O43670	BUB3-interacting and GLEBS motif-containing protein ZNF207	ZNF207	11634000	12277000	12051000	0	0	0	22860000	14509000	16058000	0	10143000	12725000	20832000	0	0	1757400	1054000	988160	317130	417770	592590	1543500	1156300	1385300	218350	281200	440940	860020	312180	715730
J3QQY2;J3KS45;Q9UM00	Transmembrane and coiled-coil domain-containing protein 1	TMCO1	0	0	0	0	0	0	0	0	0	0	0	0	0	0	2489600	0	0	0	97625	0	0	176980	0	692720	345530	243330	0	241730	514890	197550
K7ESE8;J3KSD8;Q13867;K7ES02	Bleomycin hydrolase	BLMH	13499000	16232000	0	14474000	0	0	0	0	0	20575000	19381000	0	14721000	26690000	20663000	879160	953220	0	338550	291360	0	0	0	0	710230	559130	0	135120	974450	612300
J3KSH8;J3KT51;Q9UK76	Hematological and neurological expressed 1 protein;Hematological and neurological expressed 1 protein, N-terminally processed	HN1	0	0	0	0	0	0	0	0	0	0	0	0	0	0	22102000	0	2737300	0	0	0	0	2168900	657870	1190300	0	0	311480	1627400	1509600	1753900
J3KTA4;P17844;J3KRZ1;J3QSF1;J3QRQ7;J3QR02;J3KRX8;J3KTQ4;X6RLV5;J3QRN5	Probable ATP-dependent RNA helicase DDX5	DDX5	353830000	389400000	438680000	288450000	241670000	237340000	265040000	304120000	380370000	344570000	322660000	344080000	359690000	458290000	372980000	11502000	11732000	9392100	3712100	2747400	3127900	4279800	6224800	8448300	4363800	3685600	4520700	4292300	8635500	4813200
J3KTD8		CBFB	0	0	0	0	0	0	0	0	0	0	0	0	0	0	11950000	5224400	6334600	0	0	0	2014000	0	0	0	0	0	0	4702100	0	4741200
J3QR09;J3KTE4;P84098	Ribosomal protein L19;60S ribosomal protein L19	RPL19	1425700000	1648600000	1215400000	1061000000	1723800000	1645900000	2596900000	3165600000	2732100000	2884800000	3311100000	3122500000	728270000	1177500000	863660000	192590000	226030000	123240000	82420000	140360000	141310000	291140000	389650000	297210000	202360000	201240000	184040000	43051000	99889000	53796000
J3KTF8;J3QQX2;P52565;J3KRE2;J3KRY1;J3KS60	Rho GDP-dissociation inhibitor 1	ARHGDIA	105820000	57671000	19228000	47871000	37707000	53102000	93686000	41744000	40480000	23041000	13378000	19509000	59259000	58826000	87248000	20972000	10961000	1265000	2242200	1464200	3162500	6765700	2762600	2482700	939200	467040	477800	3417200	2419500	3316100
J3KTL2;Q07955;J3QQV5;J3KSW7;J3KSR8	Serine/arginine-rich splicing factor 1	SRSF1	18313000	12347000	0	0	0	0	22340000	0	9861400	0	0	0	27680000	12941000	30279000	2044800	1259200	0	0	0	68641	842160	0	462750	0	0	0	652260	527860	740750
J3QL04;J3QR12;Q9BZE9;J3QRW3;J3KRG1;J3QR50;J3KRY8	Tether containing UBX domain for GLUT4	ASPSCR1	0	0	0	0	0	0	0	0	0	0	0	0	0	0	7314900	0	0	234460	257520	179930	0	0	500850	0	0	34964	0	69450	257990	131920
J3QLE5;P63162;P14678;J3KRY3;S4R3P3	Small nuclear ribonucleoprotein-associated protein N;Small nuclear ribonucleoprotein-associated proteins B and B	SNRPN;SNRPB	39517000	33394000	18180000	17914000	53859000	16318000	21741000	16193000	17601000	19500000	0	16886000	27791000	18947000	20262000	4097000	3318500	1037000	988090	1574800	731020	2188100	920790	1280100	943340	287530	411020	1284200	1226300	610590
J3QQ67;Q07020;G3V203;H0YHA7;F8VYV2;F8VUA6;A0A075B7A0;F8VXR6	60S ribosomal protein L18	RPL18	5096400000	6000000000	4172400000	3280500000	5711400000	5164800000	6229300000	7409100000	5954800000	6438400000	7143400000	6760700000	3243000000	3707000000	3094800000	704870000	774430000	359230000	228830000	389710000	394780000	557890000	822640000	697480000	359840000	349080000	326260000	127690000	262070000	159200000
Q96MU7;J3QR07;J3KS01	YTH domain-containing protein 1	YTHDC1	36241000	54946000	39051000	34256000	40834000	42820000	47320000	90976000	71203000	54142000	52784000	39976000	27111000	35183000	26159000	1692500	2279900	410260	477470	801790	1032800	1576600	2416300	2637700	1114400	756440	535740	498440	1156400	379160
J3QRS3;P19105;O14950	Myosin regulatory light chain 12A;Myosin regulatory light chain 12B	MYL12A;MYL12B	460360000	329320000	80343000	134150000	204980000	189470000	367360000	189410000	195010000	120470000	59134000	73645000	422210000	209810000	291460000	47620000	26795000	3532800	3407600	5712000	10425000	29702000	13706000	14402000	4777700	956810	2021200	16974000	15309000	12512000
J3QSU6;F5H7V9;H0YGZ3;F5H5D6		TNC	0	0	0	0	0	0	0	0	0	0	0	0	0	4032900	0	0	0	0	0	0	17446	0	76291	82599	0	0	0	16202	22811	0
J3QT28;O43684	Mitotic checkpoint protein BUB3	BUB3	0	18024000	0	0	0	0	0	0	0	0	0	0	0	0	0	676400	1166400	976250	166290	185120	208220	191940	247500	232750	89974	83994	90679	282340	296830	0
K4DI93;Q13620;A6NE76;A0A087WWN2	Cullin-4B	CUL4B	59812000	70489000	82311000	44826000	29536000	23941000	28493000	19751000	32272000	41785000	48525000	37212000	51220000	74175000	67004000	1364700	1485300	1197100	398360	282990	180520	206760	215610	463110	303580	312210	138500	323840	689110	582570
K7EM02;K7EIJ8;Q8IYT4	Katanin p60 ATPase-containing subunit A-like 2	KATNAL2	0	24220000	0	0	0	0	0	0	0	0	0	0	0	0	0	4076400	2438200	0	0	0	0	0	0	0	0	0	0	0	0	0
K7EJE6;K7EK60;O95466;A0A0A0MR62	Formin-like protein 1	FMNL1	0	0	0	0	0	0	39548000	0	0	0	0	0	0	0	0	1106000	1036100	562730	262100	999350	486030	873780	773750	593140	310820	301020	234750	0	0	141670
K7EJE8;K7EKE6;P36776;K7ER27	Lon protease homolog, mitochondrial	LONP1	4975700	0	0	0	0	0	0	0	0	0	0	0	0	0	0	138210	36221	0	0	0	0	0	0	0	0	0	0	0	0	0
K7EJR3;R4GMR5;P48556;K7ERW6;K7EJC1;K7ENY6	26S proteasome non-ATPase regulatory subunit 8	PSMD8	10392000	0	0	0	0	0	0	0	0	0	0	0	24627000	0	16246000	601890	316440	0	0	0	0	326410	0	0	0	0	0	571680	112640	531060
K7EK07;P84243;K7EMV3;A0A590UJJ6;B4DEB1;K7ES00;Q16695;Q6NXT2;K7EP01	Histone H3;Histone H3.3;Histone H3.1t;Histone H3.3C	H3F3B;H3F3A;HIST3H3;H3F3C	153710000	110240000	193500000	151200000	187540000	193530000	508240000	1048100000	865160000	271150000	293480000	285810000	92816000	157250000	136510000	31665000	20798000	16328000	16717000	20283000	23347000	80911000	197050000	164370000	28714000	23154000	24048000	8838600	21747000	14889000
K7EK20;K7EPK1;Q86X55	Histone-arginine methyltransferase CARM1	CARM1	0	0	0	0	0	0	0	0	0	0	0	0	0	0	0	0	0	0	0	0	0	0	0	0	0	0	0	0	0	0
K7EQ02;K7EQ55;K7EK33;Q96EP5	DAZ-associated protein 1	DAZAP1	0	0	0	0	0	0	0	0	0	0	0	0	0	0	9096700	751100	459900	0	0	259340	283870	441080	0	0	0	0	0	428800	319160	360920
K7EMW6;K7EKE2		TUBD1	0	0	0	0	0	0	0	0	0	0	0	0	23411000	0	0	0	0	1463600	5243500	8504700	6900000	10306000	9239400	5260200	0	0	0	2264900	0	0
K7ELC2;P62841;K7EM56;A0A0B4J2B4;S4R417;K7EQJ5;K7EJ78;S4R456	40S ribosomal protein S15	RPS15	80548000	81333000	19127000	14077000	22876000	21735000	77130000	55363000	38010000	26517000	26432000	32054000	12235000	35530000	42573000	15705000	10020000	2669200	889260	1453300	1700700	4081100	3460000	4198900	1789500	1595400	1107600	1647700	2035100	2635200
K7ELL7;P14314;A0A0C4DGP4;K7EPW7;K7EKX1;K7EJ70	Glucosidase 2 subunit beta	PRKCSH	97800000	67007000	0	0	46374000	34710000	77741000	0	0	0	0	0	103430000	58098000	89435000	6612100	3037000	69498	261360	819730	459100	2212100	612280	596010	9638.7	175210	188930	1660600	1846000	1934600
K7EM13;P10644	cAMP-dependent protein kinase type I-alpha regulatory subunit;cAMP-dependent protein kinase type I-alpha regulatory subunit, N-terminally processed	PRKAR1A	0	0	2282500	0	0	0	0	0	0	0	0	0	0	0	0	389010	259150	195780	0	0	0	0	0	0	0	0	0	0	0	523920
K7EM18;P41567;O60739	Eukaryotic translation initiation factor 1	EIF1	0	0	0	0	0	0	9983500	0	0	0	0	0	0	0	13870000	3250900	1298800	0	0	0	0	1059000	0	0	0	0	0	599940	396300	898220
K7ENG2;P26368	Splicing factor U2AF 65 kDa subunit	U2AF2	57017000	49485000	25848000	49503000	63110000	55107000	75613000	62816000	68374000	28847000	18147000	22664000	46988000	31916000	35730000	3821400	2976000	671500	2037700	1753700	2244300	4952700	4450400	5009900	1265200	330050	293810	1514600	1166300	1528400
K7EQ60;Q13057	Bifunctional coenzyme A synthase;Phosphopantetheine adenylyltransferase;Dephospho-CoA kinase	COASY	0	0	0	0	0	0	0	0	0	0	0	0	0	0	3222600	0	0	0	0	0	0	0	0	0	0	0	0	0	204600	182660
K7ERE3;P13646;CON__ENSEMBL:ENSP00000377550;K7EMD9;K7EQH6;K7EMJ2	Keratin, type I cytoskeletal 13	KRT13	49647000	0	0	0	0	0	0	28949000	0	350880000	189950000	0	0	0	0	2275400	466860	0	89945	155450	0	454290	269960	313010	4239300	3712800	0	0	0	74142
K7ESA9;Q96BX8	MOB kinase activator 3A	MOB3A	0	0	0	0	0	0	0	0	0	0	0	0	0	7096500	0	0	526310	772790	716620	531910	443480	0	0	609660	348600	123150	0	0	993440	0
K7ESL0;P19623	Spermidine synthase	SRM	0	5602500	0	0	0	0	0	0	0	0	0	0	0	0	0	1288300	725130	0	0	0	0	0	0	0	0	0	0	0	0	0
O14579;M0QXB4;M0R061	Coatomer subunit epsilon	COPE	75733000	54386000	41266000	80614000	79495000	77237000	42152000	56719000	81388000	48558000	33499000	53513000	71814000	60573000	81766000	5349000	3805800	1338100	2427400	3179500	3299400	1264300	3263800	4214700	1285000	915450	1063200	1935700	1850900	2718100
M0QXN5;P37198	Nuclear pore glycoprotein p62	NUP62	0	0	0	0	0	0	4179100	0	0	0	0	6516900	0	6344100	9940400	400230	359490	197800	127460	96900	152660	264130	94315	117270	0	122020	216140	406830	453700	452190
M0QY97;Q9UPT8	Zinc finger CCCH domain-containing protein 4	ZC3H4	0	0	0	0	0	0	0	0	2993000	0	0	0	0	0	0	0	0	0	0	0	0	21789	0	60094	0	0	0	0	0	0
M0R0N4;X6R390;M0QYZ2;P53680;M0QZ21	AP-2 complex subunit sigma	AP2S1	14402000	13324000	0	0	0	15926000	17043000	0	0	0	14988000	18577000	17375000	16601000	14009000	2535200	2130500	1299400	710000	675660	1311400	1649100	1383800	1341000	238090	788520	1145200	1172400	1541000	866620
M0QZD8;Q6ZTK2	Putative uncharacterized protein LOC400499		0	14543000	0	0	0	0	0	0	0	0	0	0	0	0	0	34788	87256	0	12548	21539	33606	170060	27656	47705	3663.2	0	0	79762	32848	52871
M0QZS6;Q9UBE0	SUMO-activating enzyme subunit 1;SUMO-activating enzyme subunit 1, N-terminally processed	SAE1	0	0	0	0	0	0	0	0	0	0	0	0	0	0	2438700	121210	77175	0	0	0	0	63754	0	0	0	0	0	71097	70941	53756
M0R050;Q9NQT4	Exosome complex component RRP46	EXOSC5	0	0	0	0	0	0	0	0	0	0	0	0	0	7043700	0	480580	456450	429780	238460	142630	149430	0	0	0	158940	97398	84783	189500	524020	0
M0R0F0;P46782;M0R0R2;M0QZN2	40S ribosomal protein S5;40S ribosomal protein S5, N-terminally processed	RPS5	814680000	859860000	474580000	612420000	743560000	703200000	1613300000	1348900000	1432400000	1025800000	1078600000	1172200000	877030000	1234300000	560210000	73742000	68167000	29191000	26424000	32393000	37460000	107270000	102290000	101680000	52076000	48732000	49888000	28020000	52217000	18862000
M0R0P8;Q13459;M0R300;M0R240;M0QXP0	Unconventional myosin-IXb	MYO9B	0	0	0	0	0	0	0	32724000	14940000	0	0	0	0	0	0	23168	54122	0	0	0	0	26437	182650	110580	0	0	21976	0	0	0
M0R0Y3;Q9Y230;M0QXI6;X6R2L4	RuvB-like 2	RUVBL2	0	28156000	0	0	0	18671000	0	0	0	0	0	0	13942000	16402000	0	749790	916450	379120	211040	136290	599910	566800	98520	245680	0	0	239300	657590	372670	145090
M0R117;Q02543;M0R3D6;M0R1A7;M0R0P7	60S ribosomal protein L18a	RPL18A	702900000	827140000	1394000000	1048600000	1031700000	831080000	1639100000	3338600000	2967000000	952840000	1030300000	902830000	392710000	789210000	422760000	62838000	66102000	101540000	40180000	53130000	48131000	116580000	264570000	237200000	48261000	41007000	38893000	17016000	51771000	19231000
M0R2S2;M0R165;Q9UBC2	Epidermal growth factor receptor substrate 15-like 1	EPS15L1	0	0	0	0	0	0	0	0	0	0	0	81131000	0	0	0	815160	143350	0	2669500	1946000	1635400	724210	1135600	1306800	1217500	1009900	1045900	0	0	0
M0R268;P09012;M0QXK2;M0R221;M0R2B8;M0R0G9;M0QZG7	U1 small nuclear ribonucleoprotein A	SNRPA	0	26584000	0	0	0	0	20340000	0	0	0	0	0	34109000	0	0	1404500	2832200	0	0	638980	0	1096300	799450	669690	311800	268900	334780	1240300	0	0
M0R2A8;Q86TI2	Dipeptidyl peptidase 9	DPP9	0	0	0	0	3673400	0	0	0	0	0	0	0	0	0	0	192100	224360	0	0	59196	0	0	0	0	0	0	0	0	0	0
M0R3F6;M0R2Z9;Q8IX01	SURP and G-patch domain-containing protein 2	SUGP2	0	0	0	0	0	0	0	0	3892500	0	0	0	0	0	0	0	0	0	0	0	0	0	132780	68386	0	0	0	0	0	0
M0R389;Q15102;M0QXS6;M0R323;M0QZT2;M0R1K3	Platelet-activating factor acetylhydrolase IB subunit gamma	PAFAH1B3	0	3158000	0	0	0	0	0	0	0	0	0	0	0	0	0	521800	260100	0	0	65971	0	137080	44290	0	0	0	0	154320	109590	142440
O00116;A0A1B0GWA2;A0A2R8YEL0;B8ZZ81	Alkyldihydroxyacetonephosphate synthase, peroxisomal	AGPS	17110000	18375000	0	22233000	24470000	30706000	38100000	32698000	42874000	26149000	0	18490000	0	19447000	0	366150	486790	43288	261800	346360	248090	1050800	870280	1052000	117930	47882	121240	115650	241770	150100
O00139	Kinesin-like protein KIF2A	KIF2A	8008400	7056400	9310100	13006000	6848500	6767600	11161000	27153000	31265000	10401000	8510300	13969000	0	0	8919000	157110	163580	200760	69415	147670	148620	257960	540170	833550	91042	100670	86398	21497	31934	31979
O00151	PDZ and LIM domain protein 1	PDLIM1	69769000	49054000	0	0	39628000	51716000	0	0	0	0	0	22395000	46250000	26001000	47493000	4987000	3201900	1411900	557090	1037000	1407500	866320	179740	0	242890	313920	322220	1287100	1120900	935470
O00154;K7EKP8	Cytosolic acyl coenzyme A thioester hydrolase	ACOT7	33675000	23182000	15607000	0	17313000	0	17209000	18026000	15313000	14175000	0	0	0	0	14930000	1689100	931450	607460	465180	674130	487570	330430	422180	950750	167970	0	147630	105080	127620	188900
O00178;F5H716;B0QY59;F5H257	GTP-binding protein 1	GTPBP1	41883000	53380000	43427000	66455000	52264000	53839000	57476000	108050000	82309000	54185000	50915000	55367000	0	40087000	32626000	2143000	1897700	1074700	694240	687080	1111300	1130000	3062300	2010100	673020	840930	373690	0	374740	272820
O00203;A0A590UK64;A0A590UKD3;A0A590UJU7;A0A590UJU0;A0A590UJE5;A0A590UJ60;A0A590UK04;A0A5F9UJV3;A0A2R8Y2A8;A0A590UKC4;Q13367	AP-3 complex subunit beta-1	AP3B1	0	0	0	0	0	0	0	0	0	13823000	0	0	0	0	0	191260	217500	0	34926	0	179110	301870	143520	61593	103190	60217	85248	0	86936	63275
O00231;J3QRY4;J3QS13;J3KSW3	26S proteasome non-ATPase regulatory subunit 11	PSMD11	213990000	220780000	218820000	177550000	105350000	115770000	59304000	18236000	31284000	109100000	97108000	117100000	111030000	144270000	155120000	8736900	8511400	4888000	1674400	1670600	2046100	1518900	495590	686020	1749300	1162600	1554200	1628600	3611600	2452200
O00232	26S proteasome non-ATPase regulatory subunit 12	PSMD12	15778000	11652000	0	0	0	0	0	0	0	0	0	0	0	9920500	11791000	772640	283790	103010	196840	136030	36702	75333	54565	64988	43029	0	18390	95832	170530	228230
O00264	Membrane-associated progesterone receptor component 1	PGRMC1	0	0	0	11392000	0	13343000	14058000	0	0	0	0	0	0	0	0	0	0	0	515470	309920	814960	1226000	0	241970	252820	0	0	0	473320	327290
O00299	Chloride intracellular channel protein 1	CLIC1	355260000	273820000	113150000	164380000	203330000	211260000	299780000	133220000	145190000	102680000	92320000	131640000	307000000	202260000	296160000	28301000	20099000	5715500	4770800	5093600	8628600	11491000	4587400	6047200	1794600	1409700	2902800	7536500	9133600	8696100
O00303;H0YDT6	Eukaryotic translation initiation factor 3 subunit F	EIF3F	33578000	23469000	19490000	18487000	0	17606000	23827000	0	0	0	14905000	0	24714000	28983000	30148000	3128500	2482400	1482000	269580	297580	497660	794040	148420	132120	0	118980	102680	562370	788980	602290
O00401	Neural Wiskott-Aldrich syndrome protein	WASL	0	0	0	0	0	0	0	36007000	24267000	20869000	19780000	0	0	0	0	247660	232870	0	43525	233410	0	273730	1275200	574450	346200	310640	76296	0	0	0
O00410;H0Y8C6;E7ETV3;C9JQT6;C9JZD8;E7ETV8;E7ESZ1;E7EWK4;E7EX05;E7EV12;E7EQT5;C9JXE0;C9J875;H0Y3V4	Importin-5	IPO5	116550000	107210000	82478000	103090000	68778000	71311000	60235000	34781000	31297000	47123000	103510000	43973000	94181000	68478000	93831000	1493200	1245500	823630	360910	332560	461340	318880	140790	270360	1909000	1729800	105070	385570	380690	296380
O00425;F8WD15;Q9NZI8	Insulin-like growth factor 2 mRNA-binding protein 3	IGF2BP3	106620000	112550000	160300000	147800000	103930000	125480000	98015000	99781000	109340000	89071000	102910000	74986000	118420000	122130000	85813000	2783400	2950000	2835600	2403400	2102900	2378500	1992500	2868100	2820500	1724000	1653800	1270500	1203600	2073900	1002100
O00429;F8VZ52;B4DPZ9;F8W1W3;B4DDQ3;F8VUJ9;F8VR28;F8VYL3;H0YI79;H0YHY4	Dynamin-1-like protein	DNM1L	143830000	166590000	318650000	204140000	118850000	116820000	62271000	46149000	65650000	141850000	138100000	112020000	134700000	234630000	156990000	2688900	2966200	4608500	1947600	1382400	989460	640960	558670	728100	1103900	977360	652010	859550	3135700	1102900
O00469;C9JXZ0;F8WEW3	Procollagen-lysine,2-oxoglutarate 5-dioxygenase 2	PLOD2	51805000	37227000	31075000	45815000	49706000	51587000	91062000	37519000	46014000	0	25337000	54359000	48172000	47021000	55036000	1583400	1102600	291890	430190	595220	376290	1112400	505110	812810	213550	208980	233330	797060	820610	783900
O00483	Cytochrome c oxidase subunit NDUFA4	NDUFA4	0	0	0	0	0	0	0	0	0	0	0	0	0	0	19549000	3156800	3152800	2114300	0	0	0	0	0	0	0	0	0	1563900	2622600	1292700
O00487;C9JW37	26S proteasome non-ATPase regulatory subunit 14	PSMD14	13964000	11062000	0	9322300	0	8094200	10044000	7449200	0	0	0	0	10194000	9685100	11710000	1069200	782790	326610	240430	176750	251920	429690	315650	252160	82296	69139	74052	253080	326300	278920
O00499	Myc box-dependent-interacting protein 1	BIN1	11286000	0	0	0	0	0	8104600	0	0	0	0	0	0	0	0	411530	0	0	0	0	0	173840	0	0	0	0	0	109820	0	115130
O00505;H0Y4S9	Importin subunit alpha-4	KPNA3	257130000	354690000	553850000	566070000	271050000	283900000	155210000	145430000	133530000	370250000	414180000	384630000	173260000	398160000	327350000	15042000	19380000	29116000	12780000	7994500	6860300	3745200	4900500	4991600	9923400	9176000	7944800	3895900	14274000	7535000
O00567;A0A494C128;Q5JXT2;H0YDU4;H0Y653	Nucleolar protein 56	NOP56	789690000	954940000	1483700000	878070000	860910000	947550000	808440000	1249500000	1089900000	746720000	796000000	848340000	815570000	961920000	864700000	28419000	30870000	36668000	11184000	12427000	15742000	15749000	29922000	26777000	9813900	8080200	8581400	9347700	15712000	10263000
O00622	Protein CYR61	CYR61	1553200000	1476000000	674280000	1841400000	2809000000	2199900000	4159500000	2440800000	2584200000	2832900000	914980000	3110100000	424420000	238910000	471090000	70697000	59609000	17748000	27992000	50358000	43475000	99749000	67182000	70796000	46805000	11869000	39297000	3587800	2691300	5323000
O00629;H7C4F6	Importin subunit alpha-3	KPNA4	22509000	20440000	21336000	25292000	26162000	24137000	21685000	17126000	21482000	22704000	0	21642000	22050000	25482000	25872000	836280	714970	642860	524630	885490	729560	1843700	1854400	1612700	443820	51333	333520	222700	482850	486190
O00763;F8W8T8;H0YGH5;A0A087WVR6;A0A087X0W4;A0A0C4DGT1;S4R3S7	Acetyl-CoA carboxylase 2;Biotin carboxylase	ACACB	72212000	94760000	103900000	25849000	0	56441000	72006000	74423000	71238000	78753000	0	0	0	0	63035000	589290	639000	587170	113240	188990	371060	347350	395650	378740	218280	56072	78175	24470	27549	191920
X6RAC9;P47813;O14602;A6NJH9	Eukaryotic translation initiation factor 1A, X-chromosomal;Eukaryotic translation initiation factor 1A, Y-chromosomal	EIF1AX;EIF1AY	15463000	13269000	0	0	0	0	0	17849000	20667000	0	0	0	0	0	0	2113300	2019300	0	0	0	975300	980500	1972500	2845900	0	0	140340	356260	435100	362340
O14617;A0A2R8Y611;A0A2R8Y4J3;A0A087WYN6;K7ELX8;K7ERW8;A0A2R8YCY8	AP-3 complex subunit delta-1	AP3D1	755520000	683470000	1437600000	916330000	851330000	1037600000	935780000	1704500000	1565600000	751080000	793760000	745760000	1037300000	1026300000	675600000	15394000	11811000	20570000	7101600	7325100	10281000	11325000	25729000	22214000	5855600	5682000	5905300	7657100	10326000	5301400
O14647;A0A1B0GTU9	Chromodomain-helicase-DNA-binding protein 2	CHD2	0	0	0	0	10614000	0	12255000	23162000	24655000	11789000	0	0	0	0	0	154300	75968	181080	20199	73530	0	56493	224660	224340	50898	0	19436	15836	25781	0
O14737;K7ESJ4;K7EQA1;Q3HM38;X6R2P6	Programmed cell death protein 5	PDCD5	11830000	11437000	0	0	0	0	12946000	0	0	0	0	0	10236000	8824400	9239100	1601800	867080	0	0	236420	0	830290	210390	0	0	36155	123860	356190	321080	419160
O14745;J3QRP6	Na(+)/H(+) exchange regulatory cofactor NHE-RF1	SLC9A3R1	0	0	0	0	0	0	0	0	0	0	0	0	3999000	0	0	274940	233150	0	0	0	0	342860	0	0	0	0	0	73692	0	0
O14818;H0Y586;Q8TAA3;A0A087WYS6;F5GY34	Proteasome subunit alpha type-7;Proteasome subunit alpha type-7-like	PSMA7;PSMA8	181120000	99284000	13706000	16855000	12218000	18061000	38109000	0	0	13737000	0	14379000	127990000	45781000	66975000	11380000	7305900	433540	439920	414110	658650	2086100	0	208200	366070	51175	384090	2978900	2147800	2616900
O14828	Secretory carrier-associated membrane protein 3	SCAMP3	0	0	0	0	0	0	0	0	0	0	0	0	0	0	2044400	531740	375970	266440	0	225900	233560	0	0	0	0	0	111300	0	119920	81115
O14880;Q5VV89;Q5VV87	Microsomal glutathione S-transferase 3	MGST3	0	0	8359900	7690100	16771000	18803000	7219000	38164000	22420000	9754000	0	0	0	20466000	0	1189300	742980	935700	317310	1065600	1472800	1476300	4581700	1374300	442620	116720	189260	299880	1121900	197940
O14907	Tax1-binding protein 3	TAX1BP3	0	0	0	0	0	0	0	0	0	0	0	0	0	0	6342900	1914900	0	0	0	0	0	1388900	0	0	0	0	0	517500	0	503330
O14964;I3L1P5;I3L2H4;I3L165;I3L1E3	Hepatocyte growth factor-regulated tyrosine kinase substrate	HGS	31525000	36581000	39220000	38446000	41596000	42645000	0	0	13387000	45349000	54282000	48967000	35086000	24030000	35449000	1694600	497940	1587200	733040	959820	836860	113280	0	61750	687320	584550	855660	586110	488150	503190
O14974;F8VZN8;H0YHI8;A0A3B3ISH4;H0YIS4;H0YIS3;H0YIM2;F8VW28;A0A0U1RQZ1;H0YHL8;H0YIL7	Protein phosphatase 1 regulatory subunit 12A	PPP1R12A	201690000	170940000	188540000	215020000	240740000	254540000	187690000	227100000	231360000	192770000	176070000	214880000	173410000	151220000	174390000	3248100	2327500	2217600	2972900	3552900	3508300	3366600	5391200	4917400	2121300	1262100	1560300	1951000	1851900	1150100
O14980;C9JKM9;C9J673;C9IZS4;C9JQ02;C9JV99;C9JF49;C9IYM2;H7BZC5;F8WF71	Exportin-1	XPO1	97039000	104060000	163040000	138420000	88643000	86251000	61094000	62181000	62138000	95790000	123740000	89344000	65033000	128810000	103700000	2423600	2546200	2385600	1197100	790890	612620	846980	633230	695760	729180	729420	439250	348100	1450400	518630
O15042;E7ET15;H0Y8D9;E7EW00;H7C4V2;C9JDJ7;C9J5L1;U3KPT1	U2 snRNP-associated SURP motif-containing protein	U2SURP	183290000	217400000	267480000	290160000	317510000	291560000	163840000	194280000	156910000	251150000	285980000	276190000	173580000	210530000	221840000	5966300	6582300	6406300	2981800	3977600	3914600	2669300	4686800	2739900	2829300	2665100	2537500	1841600	2358200	1832500
O15067	Phosphoribosylformylglycinamidine synthase	PFAS	0	7567400	0	0	0	0	0	0	0	0	0	0	0	0	0	132720	118210	0	0	0	0	0	0	0	0	0	0	0	0	0
O15144;C9JTV5;G5E9J0;H7C3F9;G5E9S7	Actin-related protein 2/3 complex subunit 2	ARPC2	141500000	146030000	172240000	273250000	109150000	113020000	118620000	87228000	94123000	170220000	165780000	125550000	140460000	138790000	207960000	9180700	9006400	7347100	5192200	2062900	2556200	3286400	2545300	2664000	2822200	3324200	2224900	2263700	3918100	4071300
O15145;F8VR50;C9JZD1	Actin-related protein 2/3 complex subunit 3	ARPC3	34764000	32300000	0	15913000	24625000	20290000	0	0	0	0	0	0	57091000	24672000	28348000	5443200	2046400	258060	442380	596320	863500	706660	0	278950	155920	0	0	2313600	738920	1861800
O15212;A2AB88	Prefoldin subunit 6	PFDN6	0	16016000	0	0	0	0	0	0	0	0	0	0	0	0	0	1219300	1813800	0	0	0	0	0	0	886410	0	0	0	0	0	0
O15213;H0Y6G3	WD repeat-containing protein 46	WDR46	111940000	94907000	89269000	83773000	88652000	101240000	111640000	184000000	161640000	82111000	79323000	69679000	68219000	38425000	39103000	1893300	1840300	920730	2960900	1829400	3696300	3803500	5119100	4367700	1117400	863880	955480	935250	612000	454880
Q5T8U5;O15260;B7Z1G8	Surfeit locus protein 4	SURF4	58407000	53521000	68926000	78462000	56646000	81441000	84420000	104790000	162600000	84872000	72207000	80126000	48554000	78088000	52207000	7301900	5817400	5191900	2860800	3424100	4447500	6465100	11827000	14122000	3685100	2914300	3172600	2063900	4316400	1766000
O15371;B0QYA5;B0QYA8;B0QYA6;B0QYA4	Eukaryotic translation initiation factor 3 subunit D	EIF3D	55412000	56323000	74642000	91701000	84014000	71005000	102660000	143440000	152750000	96077000	76573000	79268000	49471000	74811000	59442000	1478100	2348700	1997600	1384600	1292400	1918400	2806100	5563100	5735700	1091300	1024900	1188000	447720	890640	807570
O15381	Nuclear valosin-containing protein-like	NVL	0	0	0	0	0	0	0	0	0	0	0	0	0	0	0	0	0	0	0	0	0	0	0	0	0	0	0	0	0	0
O15400	Syntaxin-7	STX7	0	0	0	0	0	0	29656000	32677000	27860000	0	0	0	0	0	0	661790	0	0	0	219710	0	1714300	2051400	1756600	0	0	0	0	0	0
O15427;J3QQS9;J3QQV2;J3QSC3;J3QRP8;J3QLE3;J3KTM6;J3QRU2;J3KT83;J3QRA0;J3KTI8	Monocarboxylate transporter 4	SLC16A3	31278000	34496000	33275000	54752000	60783000	68365000	69019000	66892000	68502000	54529000	61513000	59358000	26058000	34732000	31386000	1713000	1972700	1332100	1209400	1510200	1800900	2207200	3413900	3218600	1470300	1050000	1147600	328090	475640	632220
O15446	DNA-directed RNA polymerase I subunit RPA34	CD3EAP	0	0	0	22776000	26469000	28230000	0	28071000	26978000	24081000	23813000	21569000	0	14540000	0	247240	287880	226340	651180	650360	791420	328980	1135600	1061800	613720	228620	235040	0	148200	82948
O15511	Actin-related protein 2/3 complex subunit 5	ARPC5	0	0	0	0	0	0	0	0	0	0	0	0	0	0	19566000	3387800	2118300	673660	645310	820310	1025500	1451600	596910	980310	523810	379370	476500	1653300	1411300	776290
O43143	Pre-mRNA-splicing factor ATP-dependent RNA helicase DHX15	DHX15	202150000	214410000	187000000	155800000	171670000	135050000	194790000	306090000	327870000	165810000	166800000	170730000	125250000	157100000	153920000	4891200	6334200	2935200	1775200	1912500	1730500	2931800	6195300	7214800	2091500	1364100	1384900	1054000	1929300	1237200
O43169;D6RFH4;H3BUX2;A0A499FJ32	Cytochrome b5 type B	CYB5B	0	45501000	0	0	0	0	0	0	0	0	0	0	65321000	42344000	46705000	4738400	7753100	434510	0	0	0	418100	0	813230	0	0	0	2825300	4502200	3734800
O43237;J3KRI4;J3KRZ2;H3BUM4;B4E2E0	Cytoplasmic dynein 1 light intermediate chain 2	DYNC1LI2	16923000	15008000	0	0	0	0	0	0	0	0	0	0	0	0	0	628000	543710	175140	192760	149010	172160	0	213880	0	130320	0	0	0	178580	141100
O43242;H0YGV8	26S proteasome non-ATPase regulatory subunit 3	PSMD3	99695000	101060000	102810000	97113000	101910000	93125000	98281000	97701000	113490000	81386000	96019000	92335000	84324000	94100000	84865000	3006900	3050700	2316700	893490	1201200	1290500	581220	2230300	1892600	968550	986640	1490300	1546400	2042500	1404400
O43252	Bifunctional 3-phosphoadenosine 5-phosphosulfate synthase 1;Sulfate adenylyltransferase;Adenylyl-sulfate kinase	PAPSS1	1898400	0	0	0	0	0	0	0	0	0	0	0	0	0	0	57526	0	0	0	0	0	0	0	0	0	0	0	0	0	0
O43294	Transforming growth factor beta-1-induced transcript 1 protein	TGFB1I1	0	0	0	9008000	0	0	0	0	0	0	0	0	0	0	0	216470	63391	39589	148190	0	25032	0	0	0	0	15173	0	30206	7099	32159
O43390;B4DT28;A0A286YEZ8	Heterogeneous nuclear ribonucleoprotein R	HNRNPR	74972000	70952000	28519000	31680000	27781000	23891000	34067000	30933000	30478000	40686000	25237000	24603000	80034000	36792000	59410000	2912400	1903600	562670	403560	484710	271520	712870	736450	886510	435970	218750	96609	678520	610020	604510
O43395	U4/U6 small nuclear ribonucleoprotein Prp3	PRPF3	63888000	67162000	60327000	67789000	81565000	106040000	0	55498000	56126000	95514000	88957000	73651000	48192000	57726000	41128000	1337000	1810300	1389500	501320	703330	1079400	715770	685480	450290	1091400	1396700	1505800	622640	1592500	1025800
O43396;K7EKG2;K7EPB7;K7EML9;K7ER96	Thioredoxin-like protein 1	TXNL1	0	0	0	0	0	0	0	0	0	0	0	0	18940000	12465000	0	469750	0	0	0	0	0	260060	0	181440	0	0	0	483710	472440	502070
O43491;Q6R5J7;Q6ZSX4;E9PN54;E9PMV8	Band 4.1-like protein 2	EPB41L2	145690000	163440000	116260000	174100000	244480000	243470000	249010000	322150000	288600000	265690000	246190000	235560000	122710000	113460000	102890000	2564600	2957400	1684500	1319300	2118200	2181900	2752100	4320900	3942800	2218400	1561100	1462000	709160	1080900	457140
O43583;F8VVL1	Density-regulated protein	DENR	51954000	52404000	31719000	58660000	77031000	89764000	205650000	231640000	212800000	101860000	84671000	65749000	57474000	28547000	39717000	5449700	5424200	3232100	2581000	3583500	4669400	13013000	20284000	20574000	3262800	3151600	2657400	2046100	1107000	1536700
O43592;F8WDU6;F5GYW6	Exportin-T	XPOT	19935000	15783000	9340500	48148000	8968700	42236000	12345000	7507800	11161000	8762600	13016000	13664000	0	0	0	395050	286070	140890	443330	144480	449700	170130	131320	254490	33285	104440	94157	19649	0	16643
O43615;M0QXU7;M0R301;M0QXM9;M0R124	Mitochondrial import inner membrane translocase subunit TIM44	TIMM44	10478000	0	0	17948000	17826000	23236000	24948000	23072000	22206000	16312000	25287000	18524000	11199000	14056000	12121000	102470	456080	211020	326130	230260	289220	721700	784250	758630	245590	216630	97647	129820	331410	157550
O43707;F5GXS2;H7C144;K7EJH8;Q08043;A0A087WSZ2;A0A494C033;A0A494C166;K7EP19;A0A494C060;A0A494C0Q3;G3V2E8	Alpha-actinin-4	ACTN4	4792200000	3397700000	2724200000	3431500000	3444600000	3528300000	2993200000	939790000	1117100000	2589900000	2680800000	3137600000	3089400000	2239300000	3072300000	89793000	57337000	33339000	25663000	27795000	33478000	34923000	8682800	10278000	19264000	16664000	20738000	25018000	24215000	24660000
O43747;H3BNN2;H3BRM7;H3BN71;B4DGE1;H3BR36;H3BUN9;H3BNR4;B3KNW1	AP-1 complex subunit gamma-1	AP1G1	26644000	30643000	26401000	22495000	14993000	13702000	0	0	0	0	15079000	11160000	0	26106000	21320000	1083800	1009000	715740	102760	117420	87583	46873	59865	93509	24035	57090	90168	147120	523560	267290
O43765	Small glutamine-rich tetratricopeptide repeat-containing protein alpha	SGTA	0	0	0	0	0	0	0	0	1482600	0	0	0	0	0	0	406350	292620	0	0	0	0	0	0	86825	0	0	0	0	0	0
O43776;K7EQ35;K7EIU7;K7EJ19;K7EPK2;K7EMQ6	Asparagine--tRNA ligase, cytoplasmic	NARS	87777000	98274000	96133000	156300000	73006000	49646000	53767000	44482000	70759000	84134000	87460000	42356000	31883000	70044000	58176000	6221300	6177900	4705700	2434600	1270600	617170	1170600	973650	1744000	1531000	1118100	451030	472810	1558100	957900
O43809;H3BV41;H3BND3	Cleavage and polyadenylation specificity factor subunit 5	NUDT21	0	0	0	11504000	16538000	12009000	20160000	9269100	14008000	11594000	13041000	0	24312000	0	23916000	532050	362250	162230	158160	633080	372520	1039400	500970	717480	300530	176690	0	765410	242550	793700
O43852;H0Y875	Calumenin	CALU	288260000	234490000	71750000	70210000	208750000	154220000	441700000	143040000	137340000	93157000	84962000	92284000	288130000	248220000	297070000	20752000	14849000	1573800	1653000	5383100	5185100	20707000	5932400	5685400	2515600	1509800	1876400	6670000	7582000	6609900
O43854	EGF-like repeat and discoidin I-like domain-containing protein 3	EDIL3	467940000	442390000	334150000	363120000	508950000	598340000	720190000	445790000	398930000	518900000	226910000	464590000	987590000	846700000	1065200000	17519000	13766000	7080400	5684200	7501400	11491000	19723000	11465000	11512000	8545900	2448600	6610200	16702000	19153000	17581000
O60216;A0A140T8W2;E5RG18;E5RJW1;E5RJK5;E5RI01;E5RFZ5;E5RFV8;E5RIN7;Q9H4I0	Double-strand-break repair protein rad21 homolog;Double-strand-break repair protein rad21-like protein 1	RAD21;RAD21L1	0	0	3264500	0	0	0	0	0	0	0	0	0	0	0	0	80811	71579	86159	70719	42330	52150	0	103060	122110	62574	62936	0	0	0	0
O60264	SWI/SNF-related matrix-associated actin-dependent regulator of chromatin subfamily A member 5	SMARCA5	103100000	130680000	177160000	165200000	198650000	131990000	147890000	277100000	252250000	190670000	229990000	213830000	113110000	142980000	105640000	1472200	1641200	1714500	1264900	1530200	1195400	1603500	3815200	3852600	1552700	1328700	1429200	823650	1687000	788090
O60287	Nucleolar pre-ribosomal-associated protein 1	URB1	0	0	5283200	0	0	0	0	0	0	0	0	0	0	0	0	8019.6	8489	32369	8433.8	11053	8783	4981.9	7888	11202	9773.8	11425	10600	4238.4	14111	6745.3
O60292	Signal-induced proliferation-associated 1-like protein 3	SIPA1L3	0	0	0	0	0	0	6619300	13000000	11069000	0	0	0	0	0	0	34544	36673	26764	17351	17427	16391	39269	87310	102210	0	0	0	15041	0	0
O60443;C9JSR4;H7C147;H7BZJ0	Non-syndromic hearing impairment protein 5	DFNA5	0	21723000	29304000	33192000	19224000	21318000	0	17987000	0	19546000	22924000	20903000	18787000	27888000	17412000	321200	1039100	1309000	505890	441580	441230	87927	383960	0	310930	225020	280350	103900	857190	269850
O60488;H0Y9A0;D6RDA8;D6RD96;D6RF95	Long-chain-fatty-acid--CoA ligase 4	ACSL4	11320000	0	10277000	0	9861800	0	12242000	11581000	14184000	0	10881000	12478000	0	12340000	0	210390	89533	104840	71136	176730	139410	167230	202580	439980	92498	80305	194690	120510	151480	0
O60493	Sorting nexin-3	SNX3	29896000	22949000	21215000	30066000	8817900	27739000	14176000	0	0	21723000	23809000	22346000	33491000	43606000	47074000	3207900	2677000	1110100	971480	310910	1053800	614200	238060	317250	1163000	843290	1091500	1432600	2260100	1829300
O60506;B7Z645;F6UXX1	Heterogeneous nuclear ribonucleoprotein Q	SYNCRIP	240690000	186930000	129810000	125800000	119340000	123690000	141990000	62061000	89626000	86882000	69011000	80151000	220830000	144460000	195920000	8741600	6261900	3028200	1669800	2100400	1509000	2761900	1803000	1651000	1163900	411020	738270	2605400	1962700	2315100
O60524;G3V5V3;G3V4D9;G3V547	Nuclear export mediator factor NEMF	NEMF	92377000	113250000	105810000	81041000	118140000	116630000	137980000	179470000	153620000	134150000	131450000	138450000	108550000	87368000	87204000	1840300	2043300	1008500	777940	932960	1697100	1208700	3518800	2427800	1277900	1209200	975460	710750	917520	669850
O60563	Cyclin-T1	CCNT1	0	4595300	0	0	0	0	0	15826000	16820000	4844400	0	4410400	0	0	0	53767	208070	33637	16621	25977	24885	78351	373220	426960	91402	23076	68097	0	31450	44951
O60565;Q9H772	Gremlin-1	GREM1	0	0	0	0	0	0	0	0	18515000	0	0	0	0	0	0	0	0	0	0	0	0	792730	837860	1445700	173060	121300	150880	0	0	0
O60664;K7ERZ3;K7EL96;K7ER39	Perilipin-3	PLIN3	204620000	143360000	118630000	95074000	76412000	98168000	63156000	26360000	0	67885000	52279000	75073000	88445000	87618000	104550000	8979100	5281500	3005400	1762300	1148300	3000000	1099200	654250	223750	612260	547090	872190	1242100	1538000	1609800
O60684;Q5TFJ7;S4R3E5	Importin subunit alpha-7	KPNA6	264950000	377200000	813910000	614900000	270240000	213300000	161010000	161560000	207320000	396820000	401360000	260680000	167220000	472840000	334340000	11397000	16055000	28942000	10928000	5882100	4423200	3371900	4610200	5246100	7712300	6132700	3306200	2655900	13599000	5940000
O60701;E7ER95;E7ER83;E7ETF4;E7EV97	UDP-glucose 6-dehydrogenase	UGDH	72323000	53191000	37894000	0	0	47462000	64295000	0	50833000	0	0	0	68264000	43757000	44904000	3597100	1660700	736760	286970	138920	625810	1648700	290000	988080	113690	90461	84549	750190	842160	896560
O60763;REV__R4GMN2;REV__Q5VZ89	General vesicular transport factor p115	USO1	606550000	689020000	1168700000	980200000	633270000	559010000	242120000	256730000	270070000	687690000	775440000	587850000	470530000	761440000	601640000	13262000	14578000	22134000	9042300	6695600	6601000	3006600	2511400	2633100	7303200	7191600	5045200	3336600	11289000	4379900
P57053;O60814	Histone H2B type F-S;Histone H2B type 1-K	H2BFS;HIST1H2BK	0	0	0	0	0	0	0	0	0	0	0	0	0	0	11600000	746290	1242400	722930	103660	403680	721910	562870	481120	450210	652090	185960	249960	417550	459500	657480
O60832;C9IYT0;H7C0M1;H7C2Q9;H7C2Q2;H7BZF2	H/ACA ribonucleoprotein complex subunit 4	DKC1	125670000	138030000	171790000	229610000	290010000	255930000	280210000	293090000	298080000	223400000	217350000	256260000	99790000	106240000	124460000	3008700	2902700	2730600	1915500	3558800	3771500	6996100	8773800	8517200	3800800	3017300	3266900	639380	1635400	1461200
O60884;A0A087WT48	DnaJ homolog subfamily A member 2	DNAJA2	20188000	0	0	0	0	0	0	0	0	0	0	0	0	0	0	917660	155240	98345	66551	49386	86122	172650	122470	146570	56409	55065	62598	114660	121860	127550
O60888;C9IZG4;C9IZQ5	Protein CutA	CUTA	28114000	23926000	0	0	7519200	0	21112000	0	0	0	0	0	28706000	21967000	27331000	5305100	3578400	0	296350	492080	377510	2971800	156680	313450	0	0	0	1973400	2146800	1990700
O75083;D6RD66	WD repeat-containing protein 1	WDR1	439960000	389250000	141850000	314560000	289660000	337900000	462110000	315470000	327320000	173120000	117750000	120280000	371470000	204680000	310920000	17724000	13340000	3276300	3942400	4346300	5154400	10434000	8061600	6937900	1755700	1163000	1157100	5009200	3610300	3604700
O75131;A0A087WYQ3;H0YB26;E5RHZ0;A0A087WXR6;A0A087WUS8;E7ENV7;Q96FN4;Q8IYJ1;Q96A23;O95741;Q86YQ8;Q9HCH3;Q9UBL6	Copine-3	CPNE3	65128000	49789000	76121000	69757000	53030000	64937000	52052000	41867000	56603000	40841000	35037000	38234000	36556000	32583000	38588000	4010900	3162700	2626800	1519900	878750	1314400	1010500	1489800	647150	674580	447700	285320	440630	560410	448570
O75151;E7ET14;A0A087WW48;H0Y589;H0Y3N9;Q9UPP1	Lysine-specific demethylase PHF2	PHF2	17392000	0	0	0	0	0	22635000	22980000	25930000	0	0	0	24988000	18044000	0	318280	356620	173950	78121	136180	114270	307880	496540	489600	89225	76097	58906	119380	122810	98872
O75165;A0A3B3IRM0;H0YA63	DnaJ homolog subfamily C member 13	DNAJC13	13568000	13957000	0	0	0	0	0	0	0	10747000	0	0	0	0	0	144910	85048	33682	61516	53863	0	7784.4	84966	0	42263	24509	17635	12637	22531	10842
O75190;E9PH18;C9JRD2;C9J2C4;C9JXB9;A0A0J9YX62;Q8NHS0;P25686	DnaJ homolog subfamily B member 6;DnaJ homolog subfamily B member 8;DnaJ homolog subfamily B member 2	DNAJB6;DNAJB2;DNAJB8	0	0	0	0	10270000	0	0	0	0	0	0	0	0	0	0	0	0	0	313000	356470	355130	0	404290	336860	0	0	0	0	0	0
O75251;F5H5N1;A0A087WXF6;A0A087WTI3;F5GXJ1	NADH dehydrogenase [ubiquinone] iron-sulfur protein 7, mitochondrial	NDUFS7	6476400	0	5496800	0	0	0	0	0	0	0	0	0	0	0	0	712350	403860	332800	0	0	63905	64138	109570	0	0	57610	51875	93880	199220	101650
O75323;F8WBI5	Protein NipSnap homolog 2	GBAS	0	0	0	0	0	0	0	13489000	23172000	10043000	0	0	0	0	0	0	0	0	68252	89672	0	738620	770200	889230	227510	234080	0	0	0	0
O75325	Leucine-rich repeat neuronal protein 2	LRRN2	0	0	0	0	0	0	0	0	0	0	0	0	0	18030000	0	0	325100	297970	120220	236070	128840	0	203170	89389	386510	0	0	0	296940	0
O75348	V-type proton ATPase subunit G 1	ATP6V1G1	0	0	0	0	0	0	0	0	0	0	0	0	0	0	0	0	0	0	0	0	0	0	0	0	0	0	0	0	0	0
O75367;B4DJC3;D6RCF2;Q9P0M6;Q5SQT3	Core histone macro-H2A.1;Histone H2A	H2AFY	1003400000	1307700000	1397900000	1019400000	1401800000	1519300000	2091900000	2807800000	2469600000	1373300000	1565800000	1483500000	979550000	1000600000	920400000	57263000	65734000	54701000	24192000	35218000	42127000	66984000	111430000	96827000	33036000	31486000	31511000	19311000	32069000	19178000
O75368	SH3 domain-binding glutamic acid-rich-like protein	SH3BGRL	32635000	0	0	0	0	0	0	0	0	0	0	0	0	0	0	4079400	228800	880600	0	0	328850	130520	0	0	0	0	0	112170	0	243250
O75369;E7EN95;H7C5L4;A0A0A0MT44;A0A0C4DGA1	Filamin-B	FLNB	1428600000	1216100000	1709200000	1750800000	1577900000	1616500000	726710000	438100000	498340000	1229800000	1238600000	1424000000	814560000	843220000	984090000	11017000	9318100	8894300	5568100	5269200	6027000	2190000	1239500	1363500	3727600	3051400	3707100	1918300	3047700	2401000
O75396;A0A087X1A9	Vesicle-trafficking protein SEC22b	SEC22B	50113000	44136000	32184000	38042000	0	42980000	44099000	48890000	59876000	30754000	35555000	37076000	45599000	44216000	31762000	5320500	3811800	1373000	773590	612420	1354600	1213800	1609400	3448100	1053400	942150	1158700	1436100	1717000	446470
O75436;S4R3Q6	Vacuolar protein sorting-associated protein 26A	VPS26A	14375000	14870000	9611500	0	0	0	0	0	10902000	0	0	0	0	0	0	836150	778290	259320	133360	210850	0	194120	0	383540	0	79284	95621	175570	297730	271910
O75475	PC4 and SFRS1-interacting protein	PSIP1	89389000	117860000	70934000	76030000	127880000	130660000	213760000	277940000	254510000	131810000	130130000	163910000	46051000	50215000	63693000	3807700	3856100	1972400	1045400	1913000	2310100	3632100	8768700	6700100	2192000	1705900	2195300	625150	674930	739150
O75477;B0QZ43	Erlin-1	ERLIN1	31951000	31098000	27368000	22753000	33793000	33472000	35688000	69563000	103480000	40358000	29889000	29215000	33610000	38567000	16975000	1228600	800830	837470	448500	742190	548340	984500	3486000	4288600	1210500	598940	514130	303890	820360	253900
O75489;G3V194;E9PS48	NADH dehydrogenase [ubiquinone] iron-sulfur protein 3, mitochondrial	NDUFS3	6862100	5399500	0	0	0	0	0	0	0	0	0	0	0	0	0	394670	295900	101130	0	40261	44694	52877	0	232280	17810	0	0	326120	326040	275630
Q5JRI1;O75494;Q6IQ42;Q8WXF0	Serine/arginine-rich splicing factor 10;Serine/arginine-rich splicing factor 12	SRSF10;FUSIP1;SRSF12	17188000	14613000	0	0	0	0	0	0	0	0	16612000	0	0	0	0	1848300	1363000	179070	371830	0	320610	474710	1460800	1262400	0	694220	226750	258130	686690	145550
O75506	Heat shock factor-binding protein 1	HSBP1	0	0	0	0	0	0	0	0	0	0	0	0	0	0	5666000	1248700	680560	0	92630	0	148160	252640	0	0	0	0	54117	0	550640	449610
O75531	Barrier-to-autointegration factor;Barrier-to-autointegration factor, N-terminally processed	BANF1	80382000	60787000	9628800	11654000	0	15795000	54687000	0	14935000	0	0	0	59480000	0	0	15344000	9019100	959810	541560	446870	1368000	6421300	586010	1783900	0	0	0	2934600	1826500	2516400
O75533;H7C341;F8WC19;B4DGZ4;A0A494C1M2	Splicing factor 3B subunit 1	SF3B1	60615000	61527000	107350000	82332000	60591000	65888000	47550000	43950000	65522000	57665000	78721000	76979000	59110000	93024000	77836000	1449000	819370	1387500	635810	361160	463370	287690	455210	739280	312300	351470	413410	403850	909080	673060
O75534;E9PLT0	Cold shock domain-containing protein E1	CSDE1	30990000	24181000	0	0	0	23337000	0	0	0	0	0	0	0	0	30902000	675790	472700	173320	150660	167460	254170	147280	0	0	69629	57057	226750	194220	87472	268820
O75569;F8WEG8;G5E9Q4;C9JMM3	Interferon-inducible double-stranded RNA-dependent protein kinase activator A	PRKRA	0	0	0	16830000	8296900	0	8606200	7126100	9155200	0	0	9307400	9198600	10542000	0	355070	262890	0	417870	260990	98186	373980	286850	501290	217660	166920	245130	268280	519620	234560
O75643;A0A494C1A5	U5 small nuclear ribonucleoprotein 200 kDa helicase	SNRNP200	306550000	371470000	583900000	467120000	250550000	204960000	184410000	244840000	319340000	300010000	350450000	289570000	273460000	529280000	407200000	2778500	3095300	3805000	1641000	854330	719920	906170	1475300	1908800	1261900	1079700	836520	568550	2878500	1319500
O75663	TIP41-like protein	TIPRL	0	0	9083200	0	0	0	0	0	0	0	0	0	0	0	0	276670	573720	389560	85305	0	119370	0	0	0	0	0	0	0	0	0
O75683	Surfeit locus protein 6	SURF6	130000000	138010000	234430000	184500000	158050000	199940000	256840000	148530000	133460000	143470000	164540000	206310000	241350000	245060000	214170000	9742900	9788300	12022000	5898200	4442700	7336900	11768000	6788300	6213500	3453300	3505600	3400100	5437100	10286000	4524900
O75691	Small subunit processome component 20 homolog	UTP20	27471000	32312000	105270000	55665000	38250000	27101000	17758000	34361000	50138000	56666000	56509000	69183000	15460000	36354000	16708000	173630	174650	502750	199950	129460	60783	50781	195950	257470	129910	199640	206770	56220	150820	36351
O75694;E9PF10	Nuclear pore complex protein Nup155	NUP155	18818000	20541000	19768000	18235000	17084000	26077000	9468600	12178000	12144000	19538000	20302000	24461000	12985000	25901000	21905000	345070	382600	265720	99486	143120	223360	38003	44421	137530	209130	186220	151130	61794	281940	109070
O75821;K7ER90;K7EL20;K7ENA8;K7EP16	Eukaryotic translation initiation factor 3 subunit G	EIF3G	0	0	0	0	0	0	0	0	0	0	0	0	13803000	0	0	1186800	813240	191290	84308	104010	118660	929970	129510	188880	93711	0	112580	281120	0	88729
O75822	Eukaryotic translation initiation factor 3 subunit J	EIF3J	9175800	0	0	0	0	0	0	0	0	0	0	0	0	0	0	655420	0	0	0	0	0	0	0	0	0	0	0	0	0	0
O75828	Carbonyl reductase [NADPH] 3	CBR3	0	0	0	0	0	0	0	0	0	0	0	0	0	34725000	0	312740	0	0	0	0	0	0	0	0	0	0	0	0	1215300	0
O75844	CAAX prenyl protease 1 homolog	ZMPSTE24	0	0	0	0	0	0	0	0	0	0	0	0	0	0	3352300	0	99304	0	0	33151	0	88823	126100	107640	28797	21078	0	74908	101730	70004
O75874	Isocitrate dehydrogenase [NADP] cytoplasmic	IDH1	0	2917600	0	0	0	0	0	0	0	0	0	0	0	0	0	134970	105730	0	0	0	0	0	0	0	0	0	0	0	0	0
O75915	PRA1 family protein 3	ARL6IP5	0	0	0	0	0	0	0	0	0	0	0	0	0	0	3800700	0	0	0	99634	0	327340	1080300	1728000	1052100	0	0	606710	0	941160	301590
O75937	DnaJ homolog subfamily C member 8	DNAJC8	0	0	0	0	0	0	0	0	0	0	0	0	0	0	13596000	848270	245150	32649	0	0	0	0	0	0	0	0	0	408310	227460	414950
O75947;F5H608	ATP synthase subunit d, mitochondrial	ATP5H	0	18221000	0	0	0	0	7908900	4672200	0	0	0	0	0	0	0	942210	1465300	153120	118540	158140	308110	712980	217420	209370	0	0	0	2333400	174270	672610
O75955;A0A140T9R1;A0A140T9W4;A2AB13;A0A0G2JJQ6;A0A140T9X0;A2AB12;A2AB09;A2AB10;A0A140T974;A2AB11;A0A140T957;A0A140T910;A0A140T9C3;A0A140T959;A0A140T9B1;A0A140T907	Flotillin-1	FLOT1	43478000	57070000	70030000	47716000	40587000	38808000	24537000	33942000	39516000	47277000	58392000	51153000	37460000	62740000	49599000	1903000	1218900	1729800	1162000	605570	756450	404050	876970	842510	933790	629900	803250	292910	1123100	908230
O75970;H0YGQ3;F5H1U9	Multiple PDZ domain protein	MPDZ	0	0	14014000	0	0	0	0	0	0	0	0	0	0	0	0	16745	19597	102300	0	0	0	0	0	23659	0	0	0	4485	0	3943
O76003	Glutaredoxin-3	GLRX3	21572000	11877000	12302000	13163000	0	0	0	0	0	11415000	0	8790600	11765000	0	11229000	1215500	735890	455030	265150	152500	196360	0	0	0	274180	121330	151180	255810	207140	242030
O76021;J3QSV6;I3L3U9;I3L3C4;I3L234;J3KPU7;I3L2F2;I3L4T8;I3L1Y4;I3L1A3	Ribosomal L1 domain-containing protein 1	RSL1D1	1818600000	1355900000	2770900000	1640900000	1509500000	1696600000	1499800000	2331600000	2014700000	1142600000	1269700000	1255500000	2645400000	1698100000	1478900000	83205000	52696000	83068000	31915000	31943000	40048000	43684000	78012000	70160000	21375000	21234000	20260000	49846000	45150000	23491000
O76094;D6RDY6;R4GNC1	Signal recognition particle subunit SRP72	SRP72	77375000	80819000	74579000	82754000	124670000	145190000	146320000	341620000	230650000	103760000	95411000	126880000	88046000	94545000	92719000	1856400	1796700	1143500	1092500	1295400	2565700	3686500	9621700	5476700	1189700	941900	1412600	563110	1001100	723240
O94776	Metastasis-associated protein MTA2	MTA2	81465000	98166000	88215000	78439000	107990000	103430000	119220000	180980000	208450000	126790000	122560000	139630000	57182000	94832000	61871000	1669400	2358300	1204400	604070	924660	1034100	1386000	2895200	3086000	1015900	858930	1271200	919370	1472100	953780
O94822;H7BYG8;S4R3T2	E3 ubiquitin-protein ligase listerin	LTN1	0	12072000	15011000	27708000	0	0	9828800	12616000	0	0	14148000	8709900	0	0	0	0	159110	205940	103000	17023	21999	62894	57007	20595	20487	42776	22917	0	40342	10764
O94874	E3 UFM1-protein ligase 1	UFL1	10785000	8302300	18789000	14143000	15159000	0	0	0	8115400	13171000	0	0	10657000	22685000	20140000	275310	226760	338980	176560	121100	30285	54905	38834	83419	79408	27096	29069	62738	284540	127160
O94906	Pre-mRNA-processing factor 6	PRPF6	0	0	9903500	0	0	0	0	0	0	0	0	0	0	15301000	0	70864	60678	121220	0	0	72600	0	0	100340	63914	55861	69375	0	153110	0
O94915;F2Z2S2;A0A286YEZ9;A0A2C9F2R7;D6RJI4;H0Y9X0	Protein furry homolog-like	FRYL	0	0	0	16534000	0	8541700	0	0	0	8552000	10690000	9778500	0	0	0	41294	72299	97883	51838	19380	27760	98031	0	0	20386	37496	24640	12799	29874	21867
O94919	Endonuclease domain-containing 1 protein	ENDOD1	0	0	0	0	0	0	0	0	0	0	7036100	0	0	0	0	56913	0	0	0	98612	0	103130	121060	103320	0	100430	0	0	0	0
O94925	Glutaminase kidney isoform, mitochondrial	GLS	6267500	4006500	0	0	0	0	0	0	0	0	0	0	0	0	0	176270	106250	0	0	0	0	31955	19095	24606	9394.3	0	10869	74690	39292	29312
O94972	E3 ubiquitin-protein ligase TRIM37	TRIM37	0	0	0	0	0	0	0	0	0	0	0	0	0	0	0	0	0	0	0	0	0	0	0	0	0	0	0	0	0	0
O94973;A0A0G2JS82;A0A0G2JQM1;E9PR62;M0R2D9;E9PNC4;A0A0G2JRS3;A0A0G2JRF9;A0A0G2JQA4	AP-2 complex subunit alpha-2	AP2A2	8216700	8456000	11820000	10947000	0	0	0	0	10236000	13887000	18814000	14027000	25217000	25950000	24437000	290710	197620	210880	48667	37417	31404	38892	44286	77860	102240	128020	85420	204990	341450	181520
O95104;A0A0A0MT33;Q9UPN6	Splicing factor, arginine/serine-rich 15;Protein SCAF8	SCAF4;SCAF8	0	0	0	0	0	0	0	0	0	0	0	6731300	0	0	0	0	92408	0	0	32282	49079	14093	90252	226960	33105	37390	73220	12157	0	0
O95183	Vesicle-associated membrane protein 5	VAMP5	0	0	0	0	0	0	0	0	0	0	0	0	0	4426000	0	549200	0	0	0	0	0	3479300	0	0	3100900	3694200	2792900	0	413060	0
O95202	LETM1 and EF-hand domain-containing protein 1, mitochondrial	LETM1	119720000	158570000	242160000	268850000	174480000	148210000	57420000	65218000	99551000	186670000	164760000	147760000	119450000	261400000	209870000	3764700	3655200	5182700	2447600	1707500	1595100	490190	800000	1273900	2131800	1507400	1545800	1267400	4137000	2267200
O95340	Bifunctional 3-phosphoadenosine 5-phosphosulfate synthase 2;Sulfate adenylyltransferase;Adenylyl-sulfate kinase	PAPSS2	48685000	46208000	24480000	38244000	39830000	55316000	85325000	85926000	92630000	36783000	40143000	36900000	36964000	45447000	40890000	1421400	1391600	330090	444640	392360	661690	1581600	2376000	2841200	355020	396520	484220	478640	645490	421080
O95347;A0A0C4DGE5	Structural maintenance of chromosomes protein 2	SMC2	13113000	0	16669000	0	0	0	0	0	0	0	0	0	0	0	0	190630	313870	183600	102050	131450	0	0	0	0	150270	21849	116170	53681	58403	32623
O95373;E9PLJ0;E9PLB2;O15397	Importin-7	IPO7	44702000	50817000	39106000	44773000	30398000	32577000	14613000	13109000	13825000	37591000	25763000	33057000	22589000	22296000	38376000	1210900	1171200	509390	600860	313650	576680	177300	173110	175810	355540	318090	345980	148850	290530	134600
Q5H8X8;O95399	Urotensin-2	UTS2	0	0	0	0	0	0	0	0	0	0	0	0	0	0	83709000	13407000	8465500	0	1494800	0	2920200	6324500	2781800	3292400	1846600	1364600	1627400	6277700	6108800	5535400
O95425	Supervillin	SVIL	0	0	0	0	0	0	0	0	0	0	0	0	0	0	5610400	0	0	0	0	0	0	0	0	0	0	3315	0	23523	30149	18550
O95433;G3V438;H0YJG7;H0YJ63;G3V3W9	Activator of 90 kDa heat shock protein ATPase homolog 1	AHSA1	0	0	6693600	0	0	0	0	0	0	0	0	0	0	0	0	609890	444170	229660	0	0	0	0	0	0	0	0	0	0	0	0
O95470;H0Y3V8;H7BXL7	Sphingosine-1-phosphate lyase 1	SGPL1	17261000	20962000	22417000	22996000	29844000	24073000	41860000	45787000	47717000	21076000	26527000	25449000	0	19927000	9999900	432730	568930	497810	507100	400820	448860	1288800	1518100	1451300	403190	200220	238910	63377	200340	79124
O95478;A0A0A0MQZ6;H0YAI9	Ribosome biogenesis protein NSA2 homolog	NSA2	0	0	0	0	0	0	0	30716000	35336000	14517000	16301000	15775000	0	0	0	155950	0	0	88695	411950	453400	452980	1649800	1867600	538340	668650	683780	0	0	0
O95487	Protein transport protein Sec24B	SEC24B	4515800	4402500	7732700	0	0	0	0	0	0	0	0	0	0	0	0	135600	124960	138760	0	0	0	0	0	0	30064	25531	44273	39806	53090	40257
O95573;C9JC11;F5H062	Long-chain-fatty-acid--CoA ligase 3	ACSL3	39714000	40292000	56157000	37349000	24019000	19739000	21964000	24422000	29251000	23393000	29195000	21706000	0	24409000	21172000	1862600	1276100	1440900	352490	441620	162000	100150	486020	420620	308870	296510	216240	51614	356120	302940
O95747;C9JIG9	Serine/threonine-protein kinase OSR1	OXSR1	11827000	12911000	10067000	12619000	11454000	10341000	0	8019900	7411400	10808000	0	9893600	9327500	11550000	14642000	836800	705730	416770	131180	122240	234890	194820	209450	220220	110440	44536	158950	144610	151340	148680
O95782	AP-2 complex subunit alpha-1	AP2A1	28935000	29251000	32322000	28155000	26197000	25320000	22418000	13222000	25208000	16907000	27048000	21336000	27061000	35574000	28804000	836820	702730	737360	385320	131630	293970	155700	201190	328160	141280	149080	152300	92341	285760	100600
O95816	BAG family molecular chaperone regulator 2	BAG2	0	0	0	0	0	0	0	0	0	0	0	0	0	0	5413600	444060	360570	231810	141290	219500	145250	0	0	226010	0	0	0	0	0	153420
O95817;C9JFK9	BAG family molecular chaperone regulator 3	BAG3	30496000	21272000	21005000	26191000	24607000	23760000	20887000	0	17226000	18775000	0	19769000	23068000	19539000	23109000	1221500	559610	181400	616940	454370	430780	173430	50585	178830	119680	52455	244080	219680	138860	283240
O96011;H7C3V6	Peroxisomal membrane protein 11B	PEX11B	0	0	0	0	0	0	0	0	11688000	0	0	0	0	18791000	0	161390	117870	109540	54045	42937	52847	110390	0	475540	0	42125	50209	84208	840120	0
O96013;M0R2X4;M0R3G6;M0R0L9;M0R1R1	Serine/threonine-protein kinase PAK 4	PAK4	55018000	71199000	67829000	81516000	92652000	77887000	117030000	124800000	130690000	86722000	97818000	90839000	48100000	56114000	42808000	2238300	2284400	1502700	1659000	1441100	1579100	2294900	4048400	4436800	1966600	1566600	1497400	421320	1147500	713960
O96019	Actin-like protein 6A	ACTL6A	24122000	20480000	0	0	0	0	0	0	0	0	0	0	0	0	0	1190600	941810	233820	108010	0	138110	184940	181060	179600	0	0	0	220430	157000	139460
O96028;D6RIS1;H0Y9U6;D6R9V2	Histone-lysine N-methyltransferase NSD2	WHSC1	8673600	9777400	11686000	16232000	23683000	11664000	18296000	16988000	13608000	16744000	22743000	20912000	11034000	0	6624800	216310	207650	113590	33168	85414	75325	89342	229280	168100	146750	117110	129900	51912	0	14985
P00338;F5GXY2;F5GYU2;F5GXH2;F5H5J4;F5H6W8;F5GZQ4;F5GWW2;F5GXC7;F5H8H6;F5GXU1;Q6ZMR3;A0A087WUM2;P07864;F5H5G7;F5H155;G3XAP5;F5H245	L-lactate dehydrogenase A chain	LDHA	2575000000	2245600000	2664000000	4549900000	2852400000	3051100000	2467000000	1639000000	1885900000	3144300000	3580200000	2881600000	2223000000	2652800000	2530000000	135370000	110360000	98503000	97643000	77439000	90556000	88929000	68282000	74124000	73293000	62217000	55747000	51021000	85500000	57756000
P00367;P49448	Glutamate dehydrogenase 1, mitochondrial	GLUD1	0	0	0	0	22355000	0	0	0	0	0	0	0	66692000	30818000	37848000	595870	429700	0	41424	146400	76045	199390	118700	161020	0	0	64167	860080	488740	539330
P00387;B1AHF3	NADH-cytochrome b5 reductase 3;NADH-cytochrome b5 reductase 3 membrane-bound form;NADH-cytochrome b5 reductase 3 soluble form	CYB5R3	145870000	160160000	228420000	223880000	138860000	129330000	125170000	83455000	103320000	108000000	123490000	108860000	100040000	206970000	130640000	8968400	10518000	9781700	7361800	5133700	6004100	6902100	4203000	5822400	2820900	2690500	2031500	2072000	9416700	3252900
P00403	Cytochrome c oxidase subunit 2	MT-CO2	0	0	0	0	0	0	0	0	0	0	0	0	13607000	0	0	1977300	1341400	386420	0	154520	0	0	0	0	0	0	357180	658200	469010	1479500
P00491;G3V5M2;G3V393;G3V2H3	Purine nucleoside phosphorylase	PNP	47931000	37584000	11942000	0	0	12118000	31760000	12159000	11655000	0	0	0	30621000	12920000	19815000	2534400	2583900	333570	238940	308250	325270	1031100	396300	415910	0	0	0	710870	407750	521820
P00492	Hypoxanthine-guanine phosphoribosyltransferase	HPRT1	31046000	21682000	10328000	10225000	9794000	12337000	21070000	0	18658000	7830800	0	0	25287000	11062000	13239000	2808900	1808200	555870	318930	262580	393910	1077200	112580	743930	182150	0	0	586350	487090	567910
P00505	Aspartate aminotransferase, mitochondrial	GOT2	40412000	0	0	0	19860000	0	28108000	0	0	0	0	0	74105000	31110000	48748000	1968100	581910	0	59107	115250	118580	602620	0	0	0	0	0	1208600	679730	708710
P00533;Q504U8;E9PFD7;C9JYS6;A0A1W2PRR9	Epidermal growth factor receptor;Receptor protein-tyrosine kinase	EGFR	20283000	10970000	21633000	12011000	11981000	14882000	0	0	0	11636000	11826000	10650000	12779000	17966000	22870000	213140	148760	154850	116970	57969	55972	28515	0	0	100980	70627	64743	128270	231770	190930
P00558;P07205	Phosphoglycerate kinase 1	PGK1	994560000	982390000	866120000	1819200000	1418300000	1812600000	1663900000	1309900000	1510500000	1525300000	1542800000	1557200000	799460000	991760000	904760000	37018000	35068000	21280000	31553000	29673000	31424000	38577000	35481000	39585000	24185000	17655000	22149000	9401500	18015000	9441000
P00568;Q5T9B7;H0YID2	Adenylate kinase isoenzyme 1	AK1	0	1223900	0	0	0	0	0	0	0	0	0	0	0	0	0	235590	100810	0	0	0	0	0	0	0	0	0	0	119890	0	109960
P01040;C9J0E4	Cystatin-A;Cystatin-A, N-terminally processed	CSTA	0	24297000	18770000	0	18457000	35740000	44579000	16943000	13630000	19474000	60486000	29512000	28129000	15822000	46562000	853270	3209600	1768500	0	1072900	2740400	3964700	1508900	1172900	1036600	2992800	1857900	1505200	992430	2691000
P02545;H0YAB0;A0A0C4DGC5	Prelamin-A/C;Lamin-A/C	LMNA	2337100000	1984700000	955150000	1298300000	1569900000	1707200000	2666100000	2535200000	2946900000	1181200000	1047000000	1383600000	2836300000	2167200000	2710800000	62981000	48462000	17753000	11598000	17053000	21011000	41367000	41878000	48352000	10912000	7737000	10811000	25980000	32923000	26892000
P02751;H0Y7Z1;H0Y4K8	Fibronectin;Anastellin;Ugl-Y1;Ugl-Y2;Ugl-Y3	FN1	893660000	578200000	624520000	645200000	611230000	729390000	890980000	1204700000	1063200000	675090000	978040000	1642800000	766030000	1984400000	945120000	8006800	3893200	3163600	2033600	2187000	2904000	4517300	8428400	7857400	2814100	3124300	6527000	3007000	14111000	4348000
P02795;P80297;P13640;H3BSF1;CON__P67983;H3BSP9;P80294;P04731;Q8N339	Metallothionein-2;Metallothionein-1X;Metallothionein-1G	MT2A;MT1X;MT1G	960360000	651810000	876680000	1130400000	874880000	1094800000	773470000	414750000	362010000	635230000	817860000	1087700000	559040000	320550000	683410000	284900000	180280000	184490000	141950000	133510000	178730000	162010000	91536000	87416000	95324000	94427000	132080000	89630000	75998000	101680000
P04040	Catalase	CAT	19184000	0	18341000	0	0	0	0	0	0	0	26657000	0	38033000	43752000	48068000	643490	602350	328460	77392	103860	0	0	77748	0	342410	212400	87047	493220	873700	838680
P04075;J3KPS3;H3BQN4;H3BPS8;H3BUH7;H3BR04;H3BMQ8;H3BU78;H3BR68;A0A087WXX2;A0A3B3IS80;P05062	Fructose-bisphosphate aldolase A;Fructose-bisphosphate aldolase	ALDOA	1722600000	1158300000	761410000	1890000000	1710000000	2271900000	1935400000	637440000	749010000	1343200000	1233600000	1442700000	1548700000	944610000	1431300000	82507000	45655000	23016000	34149000	36991000	54316000	56548000	17324000	21760000	24359000	18130000	18877000	26728000	20998000	25016000
P04080;A0A1W2PQG6;A0A1W2PS52	Cystatin-B	CSTB	157940000	135100000	76565000	71322000	89341000	97280000	96469000	39414000	23318000	0	46507000	61613000	142800000	96742000	137540000	30503000	23206000	11116000	4069300	5952500	6794300	7830500	4311500	2061700	1075200	2688100	2872600	9763300	7282600	10734000
P04083;Q5T3N1;Q5T3N0	Annexin A1	ANXA1	999390000	781380000	248670000	366900000	466320000	453540000	754330000	301980000	386710000	367310000	288740000	337200000	1356900000	761790000	992510000	49188000	33997000	6619700	5452700	9013400	10183000	20453000	8535300	11374000	4491900	3991500	4191000	31556000	28531000	26329000
P04181	Ornithine aminotransferase, mitochondrial;Ornithine aminotransferase, hepatic form;Ornithine aminotransferase, renal form	OAT	44965000	44126000	16361000	9477900	0	21360000	43146000	16761000	12979000	0	0	0	21581000	12196000	23575000	2359500	1883800	319600	321890	254270	391250	1593800	997420	373350	98534	98814	183230	552960	232340	442620
P04259	Keratin, type II cytoskeletal 6B	KRT6B	0	0	0	0	0	0	0	0	0	0	0	0	0	0	10808000	0	0	264000	0	229130	87363	124740	386460	289280	0	439610	755360	216950	186820	142940
P04264;CON__P04264	Keratin, type II cytoskeletal 1	KRT1	18129000000	48807000000	38166000000	19953000000	29475000000	16251000000	12095000000	21972000000	14463000000	61865000000	42630000000	29114000000	57784000000	50264000000	52178000000	542300000	1327000000	831740000	295960000	483660000	279980000	226490000	482040000	318690000	910920000	511620000	308480000	738700000	1001500000	721580000
P04350;M0R278;M0R1I1	Tubulin beta-4A chain	TUBB4A	28919000	22101000	0	0	0	7964600	15700000	13796000	13248000	10425000	15331000	20251000	36087000	23645000	35294000	1464500	1048300	315410	69340	149480	191340	450130	493340	548990	195910	254900	346650	731430	663570	647610
P04406;E7EUT5	Glyceraldehyde-3-phosphate dehydrogenase	GAPDH	8104700000	5222800000	1084900000	1318600000	1903200000	2007300000	6796600000	2838400000	3252000000	1773100000	1253800000	1304600000	5712900000	3652400000	5739100000	445730000	260040000	38656000	32030000	53680000	61461000	259630000	107970000	143720000	49031000	26067000	28259000	155120000	137980000	150240000
P04732	Metallothionein-1E	MT1E	20832000	16837000	20980000	0	0	0	0	0	0	0	0	0	0	0	0	7205600	5029400	4661200	2143000	0	1858300	0	0	0	0	0	0	995400	0	1109600
P04792;F8WE04;C9J3N8	Heat shock protein beta-1	HSPB1	241100000	227550000	150830000	695190000	705060000	694430000	965950000	753880000	682200000	380760000	344570000	339450000	325950000	247980000	292610000	14893000	11422000	5396300	24692000	23936000	28293000	52222000	40126000	36253000	8829400	6118500	8465100	7486400	8822600	5064000
P04843;B7Z4L4;F8WF32	Dolichyl-diphosphooligosaccharide--protein glycosyltransferase subunit 1	RPN1	326070000	315770000	206440000	242500000	257300000	261180000	412870000	679830000	706700000	257350000	255090000	269960000	310020000	309780000	294960000	8205000	7810000	3731000	2504600	2640800	2611900	6872900	15217000	15409000	2642200	2679200	2675100	3166200	5383300	3160200
P04844;Q5JYR7;Q5JYR4;Q5JYR3;F2Z3K5;H0Y5M1	Dolichyl-diphosphooligosaccharide--protein glycosyltransferase subunit 2	RPN2	122010000	133130000	89757000	108250000	98088000	106500000	168790000	259700000	283440000	91712000	102090000	103630000	142300000	121270000	137740000	6315700	6137800	3044700	1343100	1764400	2319700	4968600	8179300	9943200	1023500	1281300	1361100	2417600	3176300	2593800
P04899;P63096;A0A3B3ITM0;P09471;A0A1W2PRE1;A0A1W2PRJ7;A0A1W2PP38;H3BTM2;A2A2R6;A0A3B3IUA8;A0A1W2PS82;Q5JWD1;H0Y7E8;A0A087WZE5;A0A087WTB6;A0A1W2PQK2;P11488;A8MTJ3;P19087;P38405	Guanine nucleotide-binding protein G(i) subunit alpha-2;Guanine nucleotide-binding protein G(i) subunit alpha-1	GNAI2;GNAI1	117950000	84971000	78458000	90786000	90658000	90763000	81363000	64068000	69965000	83786000	73583000	88608000	89005000	60963000	90478000	6599400	4966300	2858500	2216500	2391800	2429700	2741800	2399600	3376900	1937600	1746800	2030400	2035200	2820700	1815000
Q93077;Q7L7L0;P04908	Histone H2A type 1-C;Histone H2A type 3;Histone H2A type 1-B/E	HIST1H2AC;HIST3H2A;HIST1H2AB	23259000	27623000	0	0	0	30883000	0	0	0	31710000	20031000	25612000	75304000	113130000	67278000	4329000	4657400	840790	706330	1782000	8163000	1357200	4187800	1834500	2466900	1316100	1660900	9179800	14831000	5565900
P05023;M0R116;A0A2R8YEY8;A0A0A0MT26;P13637;H0Y7C1;B1AKY9;P50993;Q5TC02;Q5TC01;Q13733;P54707	Sodium/potassium-transporting ATPase subunit alpha-1	ATP1A1	74321000	45888000	0	26209000	26364000	23001000	38212000	18844000	18120000	23305000	0	0	41422000	33116000	31719000	2389300	1141900	236280	165770	136650	239310	335880	262790	163870	257680	7812.9	0	330080	403060	346630
P05089;A0A5F9ZGN6;A0A5F9ZH78	Arginase-1	ARG1	0	0	0	0	0	0	0	0	0	23191000	35534000	0	0	20212000	0	190380	1235800	37450	0	0	0	185950	0	0	514510	726020	171020	333240	711600	322850
P05109	Protein S100-A8;Protein S100-A8, N-terminally processed	S100A8	17398000	26040000	20018000	0	22902000	18772000	21052000	21885000	16850000	0	27626000	24827000	0	0	20802000	1802800	2753200	1602900	370190	1371700	1026800	1580800	1945300	1156600	749670	1507600	1239400	447000	634550	1023800
P05114;F2Z2W6;F2Z2Y5;H7BXJ5;A0A494C035;A6NL93;A6NEL0	Non-histone chromosomal protein HMG-14	HMGN1	8951400	10277000	0	0	10491000	10146000	11818000	9469100	0	0	0	12760000	15025000	11371000	0	2573900	2537600	831890	315430	1025800	1036600	1792200	1242200	849850	0	0	1120200	1794200	1596600	1153500
P05121	Plasminogen activator inhibitor 1	SERPINE1	13169000	10255000	4583300	0	11193000	11336000	26580000	11503000	0	10379000	9105000	9831200	0	0	0	587470	416090	146700	144350	259840	308580	744140	463360	337140	237290	159140	188770	47583	68098	30108
P05141;Q9H0C2	ADP/ATP translocase 2;ADP/ATP translocase 2, N-terminally processed	SLC25A5	307440000	346060000	361900000	293650000	273790000	264860000	240530000	354990000	370640000	288880000	292780000	254580000	229920000	256450000	204240000	14723000	19549000	14202000	5858400	6164000	6732900	8092300	13382000	13300000	5450000	5529800	3531100	4952200	8410500	4757900
P05165;A0A1B0GU58;A0A1B0GWI4;A0A1B0GUX9;A0A1B0GWA1;A0A1B0GTR1;H0Y5U0;Q5JTW6;H0Y4B9;H0Y798;Q5JVH2;A0A2R8Y725	Propionyl-CoA carboxylase alpha chain, mitochondrial	PCCA	4310000000	3957100000	7265300000	2687500000	2716600000	3148500000	2224300000	1740800000	1339500000	2642100000	2721500000	2200500000	5113400000	5189700000	4435500000	92408000	73769000	108110000	22947000	25294000	33074000	27203000	23399000	18681000	23643000	19984000	17120000	46552000	70047000	42098000
P05198;H0YJS4;G3V4T5	Eukaryotic translation initiation factor 2 subunit 1	EIF2S1	38283000	48739000	25466000	26590000	49489000	33259000	21529000	35635000	39790000	0	0	34470000	37282000	30199000	32936000	1781700	1567300	473410	215450	727800	691990	930990	1145800	885500	0	174720	516390	1116300	695230	1151300
P05204;A0A087WZE9;Q15651	Non-histone chromosomal protein HMG-17;High mobility group nucleosome-binding domain-containing protein 3	HMGN2;HMGN3	0	0	0	0	0	0	0	0	0	0	0	0	0	0	21670000	10064000	8397000	4041900	561350	1845100	1635200	3657900	2890500	1974600	869260	388230	1044800	3764200	3300700	4298800
P05386	60S acidic ribosomal protein P1	RPLP1	142900000	103030000	41198000	0	0	47788000	127640000	38004000	47067000	0	0	23340000	142500000	70621000	149670000	57651000	36511000	5761300	2618300	4258100	7054500	28288000	8789300	12249000	1999300	483040	3269600	18932000	12351000	15586000
P05387;H0YDD8	60S acidic ribosomal protein P2	RPLP2	592750000	451060000	44032000	88573000	160940000	133710000	336310000	105900000	112280000	61098000	40632000	75902000	371970000	213650000	352250000	122420000	86733000	4368000	6662000	10802000	9622200	45221000	14463000	12921000	4073200	2668200	5195900	31306000	27664000	28706000
P05388;F8VWS0;F8VW21;F8VU65;F8VPE8;G3V210;F8VZS0;Q8NHW5;F8VQY6;F8VRK7;F8VWV4;F8VS58;F8W1K8	60S acidic ribosomal protein P0;60S acidic ribosomal protein P0-like	RPLP0;RPLP0P6	225550000	213990000	117070000	83574000	70621000	67775000	102360000	23360000	52588000	55225000	52105000	66883000	161320000	130640000	141220000	19162000	15279000	5345000	2855600	2259600	2437200	5825000	590810	1346600	2355100	1260000	1347400	4751600	6303000	4585600
P05455;E7ERC4;E9PGX9;E9PFL9	Lupus La protein	SSB	35415000	24622000	0	0	0	0	17385000	0	0	0	0	0	28778000	19188000	22133000	2138600	1303400	0	69240	80509	183350	300310	0	92275	23272	0	21130	579060	309650	235460
P05556;E7EQW5;C9JPK5;Q5T3E6;E9PLR6;E7EUI6;H7C4N8;E7ERX5;C9JJP8;Q5T3E5;E9PQJ2;C9JNE0	Integrin beta-1	ITGB1	585250000	450900000	284360000	449880000	437190000	460400000	365280000	128680000	208080000	454340000	445460000	559100000	504590000	396890000	522470000	18285000	12928000	6603700	5439300	6211400	6500600	7153100	2225700	4354200	5786000	4398300	4428400	5711200	7255400	5567700
P05783;F8VZY9;CON__H-INV:HIT000015463	Keratin, type I cytoskeletal 18	KRT18	840470000	732810000	768720000	667360000	789240000	829140000	671960000	933730000	957170000	656890000	596910000	672250000	854520000	777760000	853250000	34999000	28783000	25088000	9667000	13865000	16649000	16757000	26640000	26231000	8765700	6250700	8290800	12022000	18315000	12310000
P05976;P08590	Myosin light chain 1/3, skeletal muscle isoform;Myosin light chain 3	MYL1;MYL3	0	0	0	0	0	0	0	0	0	0	0	0	32618000	0	0	2921800	1798000	528990	0	0	0	0	0	0	439560	0	0	1051900	0	0
P06576;H0YH81;F8W079;F8W0P7;H0YI37	ATP synthase subunit beta, mitochondrial;ATP synthase subunit beta	ATP5B	696210000	575600000	209700000	206140000	231750000	255060000	316030000	157900000	184650000	174330000	105320000	155220000	600550000	471540000	593540000	28089000	20810000	3492200	1861800	3185200	4907300	6357700	3138400	3711600	2275700	913560	1526900	8486300	9872600	8954600
R4GN98;P06703	Protein S100;Protein S100-A6	S100A6	1207500000	915970000	233070000	205010000	195260000	148450000	367890000	140960000	145910000	229810000	182700000	246230000	1024800000	671010000	1015400000	213300000	171790000	27535000	14229000	18386000	21879000	51580000	17989000	21563000	13349000	7678600	13175000	94027000	80355000	81708000
P06733;A0A2R8Y6G6;K7EM90;A0A2R8YEM5;A0A2R8Y879;K7ERS8;A0A2R8Y798;A0A2R8YEG5;A0A2R8Y6I8;P13929;E5RI09;E5RG95;K7EPM1;K7EKN2;E5RGZ4	Alpha-enolase	ENO1	10530000000	9114400000	8911700000	8331300000	7099800000	9351900000	6573100000	5114300000	6158500000	8234100000	6323900000	6429500000	7858900000	7098500000	8630300000	476590000	389960000	283140000	160980000	152440000	219630000	177930000	165250000	202970000	151530000	101590000	107950000	146610000	192020000	158780000
P06748;E5RI98;E5RGW4	Nucleophosmin	NPM1	1267500000	1225900000	1002800000	1053800000	1144700000	1287400000	514840000	706500000	687430000	1196400000	1038100000	1207000000	658790000	677490000	822020000	109210000	89075000	63679000	37700000	48713000	53070000	20372000	45367000	44654000	43868000	28382000	38063000	17412000	28947000	24764000
P06756;H7BZG1	Integrin alpha-V;Integrin alpha-V heavy chain;Integrin alpha-V light chain	ITGAV	19095000	14846000	0	0	0	0	0	0	0	0	0	0	0	0	26855000	390250	283170	0	22262	0	37837	42428	43706	70357	27078	0	0	56061	32547	137050
P07108;A0A0A0MTI5;B8ZWD1	Acyl-CoA-binding protein	DBI	41928000	35958000	0	0	0	0	0	0	0	0	0	0	0	0	0	10149000	4918000	0	0	693320	0	2138700	0	0	0	0	0	859330	1020300	814820
P07237;H7BZ94;H0Y3Z3;I3L398;I3L312;I3L4M2;I3NI03;I3L0S0;I3L3P5;I3L3U6;I3L514;I3L1Y5	Protein disulfide-isomerase	P4HB	529170000	392950000	60027000	108570000	177500000	203570000	556760000	152590000	190570000	102990000	62900000	66120000	524600000	379550000	445540000	16527000	9943800	647930	987480	2015700	2695400	10829000	2030700	3358600	1063400	398820	401660	6763600	6160800	5511500
P07355;H0YN42;H0YM50;H0YMU9;H0YMD0;A6NMY6;H0YKS4;H0YNP5;H0YN28;H0YMM1;H0YL33;H0YKX9;H0YMT9;H0YLV6;H0YKZ7;H0YMW4;H0YKL9;H0YKV8;H0YNA0;H0YMD9;H0YN52;H0YNB8;H0YKN4;H0YLE2	Annexin A2;Annexin;Putative annexin A2-like protein	ANXA2;ANXA2P2	7489100000	6719700000	5666500000	7542900000	6514900000	6621600000	6138100000	5965200000	6466300000	6635900000	6527200000	6762400000	6472700000	6406300000	6112400000	298690000	240780000	160420000	128260000	133790000	155800000	168220000	181700000	206770000	123290000	102270000	117410000	116670000	161710000	113840000
P07384;E9PRM1;E9PJJ3;E9PLC9;E9PMC6;E9PJA6;E9PSA6;E9PQB3;E9PIA9;E9PLX0;E9PL37	Calpain-1 catalytic subunit	CAPN1	126230000	116380000	102950000	85406000	78133000	129780000	149790000	148690000	132680000	187110000	137820000	0	230960000	191000000	185080000	1726300	2419800	5692000	495220	1095200	1261600	1192600	1453400	1188500	3967700	5699400	2285800	3390500	5369300	2550200
Q5JP53;P07437;Q5ST81;A6NNZ2;CON__ENSEMBL:ENSBTAP00000025008;Q9H4B7	Tubulin beta chain	TUBB	1185900000	886950000	349290000	630960000	649030000	674540000	883290000	426990000	456770000	317530000	259510000	315500000	765810000	453940000	638010000	64899000	43160000	13474000	12508000	14957000	16390000	28254000	14417000	15868000	6696600	4845200	5529200	16911000	15242000	14801000
P07711	Cathepsin L1;Cathepsin L1 heavy chain;Cathepsin L1 light chain	CTSL	0	0	0	999070	0	0	0	0	0	0	0	0	0	0	0	870660	501330	0	37355	0	0	0	0	0	0	0	0	0	0	0
P07737;K7EJ44;CON__P02584;I3L3D5	Profilin-1	PFN1	1960900000	1301100000	560420000	833810000	790710000	868700000	1203700000	426910000	463510000	544910000	492510000	575180000	1094800000	658750000	1046800000	186780000	129700000	38258000	52030000	53929000	66425000	107030000	32495000	36635000	29837000	18911000	20713000	54802000	43233000	50040000
P07814;V9GYZ6;V9GZ76	Bifunctional glutamate/proline--tRNA ligase;Glutamate--tRNA ligase;Proline--tRNA ligase	EPRS	160850000	166630000	172320000	210430000	176150000	157080000	165900000	214540000	255380000	158800000	177810000	202000000	174130000	207200000	186280000	2112000	1957900	1438700	1371700	1167000	1207800	833040	2169900	2499400	802100	824540	811650	461660	1254800	581540
P07858;R4GMQ5;E9PKQ7;E9PNL5;E9PHZ5;E9PLY3;E9PSG5;E9PQM1;E9PR54;E9PJ67;E9PCB3	Cathepsin B;Cathepsin B light chain;Cathepsin B heavy chain	CTSB	308130000	139840000	17650000	9962200	21621000	33261000	110610000	29628000	18517000	12698000	12244000	0	290570000	236380000	319910000	13124000	5909200	665100	277580	693940	1142200	5365200	1152600	662470	294760	191790	105580	6423500	6276200	6972900
P07900;G3V2J8;Q14568;Q58FG0;Q58FG1	Heat shock protein HSP 90-alpha	HSP90AA1	3415700000	2748100000	911280000	817660000	974740000	991730000	1712500000	618510000	720050000	661390000	552260000	747690000	2703400000	1515100000	2169400000	121860000	87780000	20290000	8380500	12452000	13360000	29454000	10161000	10092000	7182100	3864600	5381000	33674000	27773000	26478000
P07954	Fumarate hydratase, mitochondrial	FH	277080000	283060000	428120000	388480000	255950000	261830000	113200000	114930000	146450000	245650000	209670000	174470000	175330000	301450000	245150000	12321000	11809000	11839000	6321200	4209800	4922400	2626500	2900400	3934100	3960900	2916900	2485400	2836200	6901100	4012500
P07996;CON__Q28194	Thrombospondin-1	THBS1	0	20999000	24767000	0	0	0	0	0	0	0	0	0	0	0	0	228580	291960	285400	0	0	0	0	0	74121	0	0	0	0	0	0
P08133;E5RK69;E7EMC6;E5RK63;E5RFF0;E5RJF5;E5RI05;E5RJR0;E5RIU8;H0YC77	Annexin A6;Annexin	ANXA6	438290000	360510000	199540000	309340000	309430000	319450000	294440000	176870000	195280000	226240000	202910000	197040000	381530000	313400000	354190000	11083000	8778800	3054100	2578100	3155500	3705000	4660900	2733200	2624600	1971300	1274800	1441000	4145700	3938300	3371500
Q5JR08;P08134;E9PQH6;Q5JR07;Q5JR05;U3KQA9;U3KQV3;Q5JR06;E9PN11;E9PLA2;P62745	Rho-related GTP-binding protein RhoC	RHOC	154190000	90699000	50410000	74637000	59390000	98425000	126180000	54520000	50893000	60874000	46064000	53932000	91719000	52765000	88423000	20054000	10326000	1680800	4381600	3441700	6516600	9976000	4113100	4616200	3660800	2376600	3058600	4059300	2309700	4455700
P08238;Q58FF7	Heat shock protein HSP 90-beta	HSP90AB1	677590000	539510000	188770000	225160000	253420000	253970000	462060000	217910000	230310000	203140000	170430000	202550000	492560000	291100000	383940000	28995000	20844000	3905000	2651700	3083200	3038200	7866800	4408000	4448500	2119500	1430700	1507300	6158900	5367100	5348400
P08240	Signal recognition particle receptor subunit alpha	SRPR	224070000	282580000	406190000	292240000	189390000	159750000	224180000	254300000	287620000	254100000	275270000	287720000	92550000	192200000	161920000	8184900	9954200	10190000	3306300	1989200	1705300	3199300	4036900	3912500	2665700	2826600	2998500	860410	3173100	2071200
P08579	U2 small nuclear ribonucleoprotein B	SNRPB2	21874000	17418000	0	0	0	16827000	20148000	11201000	0	0	7739400	0	18122000	11837000	16462000	1923000	1547800	0	527910	432870	686240	1149700	1050500	888110	129250	249320	160510	753940	739720	756020
P08621;M0QYR1;M0QX04	U1 small nuclear ribonucleoprotein 70 kDa	SNRNP70	66778000	80822000	33542000	58739000	118110000	116230000	134230000	110300000	109380000	144930000	145880000	147340000	68929000	65224000	60012000	4524500	5373600	1367600	1809400	3844600	4236400	3946300	5489600	5521600	3229900	2583700	2271400	1411800	1393000	1092500
P08648;H0YIV7	Integrin alpha-5;Integrin alpha-5 heavy chain;Integrin alpha-5 light chain	ITGA5	25256000	22503000	0	42651000	39709000	46660000	46679000	22954000	23721000	31178000	28014000	25723000	27043000	0	16564000	858150	429780	0	503740	594990	428930	454180	436910	623050	317230	159650	250990	209090	71359	196940
P08670;B0YJC4;B0YJC5;A0A1B0GTT5;A0A1B0GVG8;P17661;H7C5W5;P41219;B4DIR1;K7ELP4;K7EKH9;E7EMV2;E7ESP9;P07197;F8W835;P07196	Vimentin	VIM	53912000000	52265000000	65690000000	57977000000	70520000000	87679000000	74086000000	121830000000	109440000000	60113000000	53697000000	51828000000	56195000000	55516000000	56990000000	1573300000	1346100000	1291700000	776400000	937810000	1272600000	1429700000	2628600000	2488500000	676220000	563690000	538750000	655560000	884560000	676040000
P08754	Guanine nucleotide-binding protein G(k) subunit alpha	GNAI3	7636200	7245700	0	0	0	0	0	0	0	0	0	0	0	0	0	504450	441830	0	0	0	0	0	0	0	37394	307670	59056	60460	44898	59395
P08758;D6RBL5;D6RBE9;E9PHT9;D6RCN3	Annexin A5;Annexin	ANXA5	1320700000	1136200000	1189300000	1371900000	936300000	1055900000	771420000	415960000	450290000	748680000	660780000	569030000	1307700000	1676800000	1395600000	73360000	50994000	48549000	24803000	18214000	24249000	20125000	11423000	12853000	11848000	8094800	6599500	23784000	41645000	24755000
P09104;F5H0C8;F5H1C3;U3KQP4	Gamma-enolase;Enolase	ENO2	258520000	225960000	70669000	184110000	211340000	282750000	507680000	230550000	259630000	148180000	179590000	161790000	237920000	210480000	134320000	8759900	11044000	5096300	5596300	5304200	4928700	9949700	5318200	9734600	4321000	2985600	3707700	6808200	7485300	3888000
P09211;A8MX94;A0A087X2E9;A0A087X243	Glutathione S-transferase P	GSTP1	323010000	180260000	29724000	29451000	66955000	72612000	175860000	40246000	58429000	31839000	0	15573000	227380000	117550000	199090000	31599000	14148000	1438200	976780	1966700	2177300	11693000	1690700	2935300	906890	74004	462780	7428200	5194900	9924900
P09382;F8WEI7	Galectin-1	LGALS1	4261000000	2545500000	1242900000	1295600000	1268300000	1830600000	3317300000	955960000	941770000	896160000	696400000	1060100000	3322300000	1856200000	3029700000	427470000	270370000	94635000	59479000	57671000	106210000	194770000	61730000	70721000	41547000	27470000	42439000	163760000	121580000	149990000
Q5T7C4;P09429;B2RPK0	High mobility group protein B1;Putative high mobility group protein B1-like 1	HMGB1;HMGB1P1	340200000	193040000	23962000	0	21351000	23328000	163490000	36569000	35347000	34723000	25397000	24657000	244890000	43835000	308840000	62572000	37686000	5996900	1409500	2907600	2834600	14052000	6114900	8573700	3410700	1619800	1783300	19228000	12382000	22088000
P09525;Q6P452;B4E1S2	Annexin A4;Annexin	ANXA4	12466000	0	0	0	0	0	0	0	0	0	0	0	0	0	0	566630	276370	0	99533	132090	149710	202420	174790	130730	69244	0	78830	0	173320	287120
P09661;H0YMA0;H0YKK0;H0YLR3	U2 small nuclear ribonucleoprotein A	SNRPA1	0	0	0	10287000	10597000	0	0	0	0	0	0	0	12985000	14194000	22884000	2042200	1666600	806090	440960	587820	498030	539150	584800	681860	266660	273270	343640	578100	665530	808320
P09874;Q5VX84;Q5VX85	Poly [ADP-ribose] polymerase 1	PARP1	86031000	91218000	57364000	54182000	60590000	54741000	117460000	152150000	176300000	61453000	53309000	72742000	67693000	95242000	67947000	1328900	2006600	681120	499650	531530	626190	1048400	2546400	3401900	417960	337960	531570	401050	770760	435080
P09960	Leukotriene A-4 hydrolase	LTA4H	23607000	16486000	0	0	0	0	0	0	0	0	0	0	0	0	0	719860	385630	0	0	0	0	25680	0	0	0	0	0	413210	218280	214500
P09972;A8MVZ9;K7EKH5;C9J8F3;J3KSV6;J3QKP5	Fructose-bisphosphate aldolase C	ALDOC	38946000	34582000	14377000	42845000	0	49009000	32430000	13885000	16636000	25954000	31746000	24834000	23984000	17955000	33291000	1749900	1289400	418490	819390	273530	1149200	926940	409610	497240	499720	579100	377240	454170	636530	754220
Q71UI9;P0C0S5;C9J0D1;A0A494C189;C9J386	Histone H2A.V;Histone H2A.Z;Histone H2A	H2AFV;H2AFZ	158460000	257590000	174070000	58538000	92055000	137770000	140540000	122530000	143940000	141310000	129630000	107170000	157880000	112090000	162610000	40448000	58456000	31680000	1748300	2930700	5768200	10920000	21417000	29832000	8457800	12663000	12330000	7407500	18897000	4915100
P0C7M7	Acyl-coenzyme A synthetase ACSM4, mitochondrial	ACSM4	0	0	0	0	0	0	0	0	0	0	0	0	0	14700000	0	0	0	0	0	0	0	0	0	0	0	0	0	0	316590	0
P0DN76;Q01081;Q8WU68;A0A1B0GW87;M0QYK5;M0R2N4;K7EJH3;K7EJM7	Splicing factor U2AF 35 kDa subunit;Splicing factor U2AF 26 kDa subunit	U2AF1;U2AF1L4	43180000	35815000	18768000	25420000	32163000	37920000	75303000	69678000	75773000	24323000	23132000	26582000	53947000	38148000	45381000	3717000	2979500	1299300	1286600	1855400	1700700	4813200	4090300	4353100	591680	475340	772720	2149800	1315700	1909600
P0DP25;P0DP24;P0DP23;A0A590UK56;E7EMB3;Q96HY3;G3V361;A0A590UJI2;A0A590UJC0;G3V226;M0QZ52;F8WBR5;G3V479;P27482		CALM2;CALM1	651580000	413650000	33183000	86330000	192150000	189540000	410850000	108170000	123310000	54933000	35124000	63248000	486540000	270520000	353510000	73796000	47768000	3301300	3374700	10609000	9755800	27300000	5605800	5991400	2032000	807150	3449500	21246000	16786000	16784000
P10412	Histone H1.4	HIST1H1E	430570000	523280000	1920400000	370540000	376810000	1019000000	73275000	37472000	53091000	271390000	93503000	266660000	1894400000	1321100000	672030000	46489000	49623000	138170000	23553000	27128000	54770000	11173000	2175200	8825800	8698600	4961800	15230000	72735000	63595000	41331000
P10599	Thioredoxin	TXN	332630000	265820000	131830000	121400000	192880000	189340000	228550000	82577000	90907000	120430000	123070000	105270000	247700000	185130000	208300000	58941000	45029000	14490000	8281900	17118000	16860000	21354000	7741200	5914300	3045100	1830900	1560700	13195000	13137000	11584000
X6R8A1;X6R5C5;P10619	Carboxypeptidase;Lysosomal protective protein;Lysosomal protective protein 32 kDa chain;Lysosomal protective protein 20 kDa chain	CTSA	0	0	0	0	0	0	15441000	0	0	0	0	0	0	21220000	0	552610	471580	152360	85150	0	132840	462020	0	81430	105680	83951	82289	242780	559350	231200
P10768;X6RA14;H7BZT7;U3KQT1	S-formylglutathione hydrolase	ESD	48818000	62163000	0	32473000	32042000	24781000	46708000	0	0	0	0	0	89205000	30263000	69312000	5804000	3320900	143630	379760	422710	1067900	2220200	484310	0	180450	42515	0	2536100	1091300	2217900
P10809;E7ESH4;E7EXB4;C9JL25;C9JL19;C9JCQ4;C9J0S9	60 kDa heat shock protein, mitochondrial	HSPD1	779840000	577810000	245000000	343190000	376970000	404890000	581530000	387690000	441130000	368450000	211870000	263600000	741120000	581920000	730200000	28796000	20869000	5480400	4346800	4589900	6105600	12154000	8242200	10146000	3907800	1742800	2113200	9299100	10394000	8300000
P11021	78 kDa glucose-regulated protein	HSPA5	903450000	689810000	219760000	313130000	407680000	444230000	753880000	306900000	316290000	271380000	229850000	224290000	727600000	544290000	724230000	34030000	24093000	3395000	3472300	5513600	6246100	16844000	4571700	5253700	2982300	2082100	2413000	11002000	12015000	10718000
P11142;E9PKE3;E9PNE6;A8K7Q2;E9PN89;E9PLF4;E9PQQ4;E9PQK7;E9PK54;P54652;E9PS65;E9PPY6;E9PN25;E9PI65;E9PM13	Heat shock cognate 71 kDa protein	HSPA8	2918200000	2244500000	1227900000	1417300000	1532700000	1544900000	1677100000	990000000	1026400000	1149500000	949520000	1144400000	2371900000	1580300000	2040800000	91999000	66501000	26622000	17579000	20499000	23305000	33274000	17966000	18410000	12386000	9309200	11487000	30278000	28470000	28128000
P11166;A6NL68;A0A0D9SG74;A0A0D9SFK9	Solute carrier family 2, facilitated glucose transporter member 1	SLC2A1	43685000	42426000	47848000	49305000	51925000	52165000	50448000	64776000	54881000	63844000	58749000	48012000	34930000	31516000	15285000	2382800	1931500	1686600	2095900	2390100	3004100	3507500	4601000	4307300	1648900	1159900	1181600	801610	959560	268910
P11216;P11217;H0Y4Z6	Glycogen phosphorylase, brain form	PYGB	354390000	180630000	53960000	18702000	0	22361000	37612000	18161000	27080000	56852000	0	0	99843000	27245000	58477000	5089400	5396200	615910	217660	0	212860	298590	204340	284610	1118900	0	0	532210	398940	256540
P11279	Lysosome-associated membrane glycoprotein 1	LAMP1	28837000	23349000	0	0	0	0	0	0	0	0	0	24238000	60783000	30929000	59469000	1240200	797160	162470	53560	0	0	336270	0	0	0	12186	244820	1311800	982540	1591500
P11387;E5RIC7;Q969P6;E5RJ95;E5RFS0;E5RJ33;H0YBR3;H0YC03;E5RGE7;E5RGR4;E5RFE3;E5RGR2	DNA topoisomerase 1	TOP1	1072700000	1173100000	1223000000	1080800000	1243700000	1273300000	1183000000	2271500000	1911700000	1138200000	1107400000	1077200000	897000000	957710000	773190000	30194000	27970000	25247000	13857000	17151000	18505000	19079000	46329000	36516000	12980000	10521000	9836200	8072200	14084000	7014400
P11388;J3KTB7	DNA topoisomerase 2-alpha	TOP2A	167190000	213750000	184400000	342700000	439690000	433300000	435290000	741310000	617130000	370880000	368240000	442680000	132580000	138960000	108160000	1347700	1913400	1126300	1714300	2630400	2998500	3131200	7756100	5731600	2211700	1491500	2009400	459960	669570	349720
P11413;E7EM57;E7EUI8;E9PD92	Glucose-6-phosphate 1-dehydrogenase	G6PD	92051000	75494000	26727000	41667000	46586000	49978000	81102000	24417000	30063000	23802000	19218000	27533000	120660000	73197000	99249000	2077800	1330600	571000	630280	860790	706290	1564800	544740	571220	233790	207340	160210	1306400	1563700	1204000
P11498;A0A494C016;A0A494C101;A0A494C0T2;E9PRE7;A0A494BZT5	Pyruvate carboxylase, mitochondrial	PC	1935400000	1737700000	2676700000	1410300000	1516900000	1878900000	1601600000	1299200000	1137400000	2802100000	3004600000	1994800000	3367400000	3376000000	2702000000	30671000	27298000	31709000	8978900	12168000	17172000	16984000	14794000	11952000	20270000	18238000	11220000	25345000	33509000	17971000
P11908;H7C540	Ribose-phosphate pyrophosphokinase 2	PRPS2	0	0	1408600	0	0	0	0	0	0	0	0	0	0	0	0	296240	221250	60412	0	0	0	0	0	0	0	0	0	0	0	0
P12004	Proliferating cell nuclear antigen	PCNA	0	0	0	0	0	0	0	0	0	0	0	0	26373000	15779000	0	588690	770530	0	0	0	0	38250	0	0	0	0	0	642890	544930	532060
P12081;E7ETE2;B4DDD8;B4E1C5;B3KWE1;D6RF05;A0A2R8YCI2;A0A2R8YFR1;A0A2R8Y4X6;A0A2R8Y5E8;D6RJE6;A0A2R8Y6I1;A0A2R8Y3N3;A0A2R8Y5P7;P49590	Histidine--tRNA ligase, cytoplasmic	HARS	17384000	14509000	0	0	0	0	0	0	0	0	0	0	19316000	15381000	16678000	871160	471890	55802	29286	60358	0	69758	0	0	29880	17309	30444	195150	214050	297340
P12235;V9GYG0	ADP/ATP translocase 1	SLC25A4	0	10450000	15043000	0	15604000	17565000	12175000	18140000	12956000	0	14396000	16742000	0	0	0	419030	448880	655460	109720	227020	328450	359680	623910	449840	92165	284240	385450	47392	217400	0
P12236	ADP/ATP translocase 3;ADP/ATP translocase 3, N-terminally processed	SLC25A6	1204000000	1193400000	1155700000	1051500000	1117500000	1184000000	972300000	1338600000	1412400000	1120400000	1199600000	1312800000	963170000	1216600000	937240000	65762000	59749000	46568000	20306000	28112000	27914000	28677000	45868000	47757000	21223000	19533000	22477000	22163000	37327000	20305000
P12270	Nucleoprotein TPR	TPR	11173000	9937000	0	0	0	0	6964200	0	0	0	0	0	9997700	8093500	10142000	81644	62604	29467	2289.5	9849.9	12298	30759	0	12882	0	0	0	50031	38575	48695
P12273	Prolactin-inducible protein	PIP	0	0	0	0	0	0	0	0	0	0	0	0	0	0	13755000	0	355710	333090	201660	169190	936890	1617100	879410	770470	276680	333880	483830	382580	601670	606370
P12814;H9KV75;G3V2N5;G3V2W4;H7C5W8;H0YJW3;A0A494C1A0;P35609;H0YJ11;G3V2X9;F6THM6;G3V5M4;G3V380	Alpha-actinin-1	ACTN1	1395000000	971110000	688190000	796340000	749870000	751280000	679980000	207870000	271730000	535290000	565900000	633930000	1018400000	632360000	1017700000	31664000	20009000	10349000	5992700	5984400	6102400	7386100	1587500	2704400	3877000	3597100	4106300	7236600	7568800	8106800
Q9Y623;P12882;Q9UKX2;A0A087X0T3;P12883;P13535;Q9UKX3;P13533;P11055;A7E2Y1	Myosin-4;Myosin-1;Myosin-2;Myosin-7;Myosin-8;Myosin-13;Myosin-6;Myosin-3;Myosin-7B	MYH4;MYH1;MYH2;MYH7B;MYH7;MYH8;MYH13;MYH6;MYH3	0	0	0	0	0	0	0	0	0	0	0	0	0	0	48674000	0	0	0	0	0	0	0	0	0	0	0	0	137590	0	187500
P12956;B1AHC9	X-ray repair cross-complementing protein 6	XRCC6	264340000	202940000	55942000	67136000	50984000	90894000	127460000	75110000	74206000	69782000	51433000	62521000	204080000	129340000	161900000	8551400	6081100	1325300	445420	549140	1009100	2305200	1164000	1676100	860960	541650	710500	2716600	2800600	2364300
P13010;C9JZ81	X-ray repair cross-complementing protein 5	XRCC5	267830000	242420000	148840000	160730000	180290000	175760000	209670000	207470000	202690000	143970000	151940000	159490000	254740000	224530000	228130000	8594600	6594700	2650600	1631500	1992500	1847500	3225400	4135800	4723200	1453400	1126300	1214800	2269900	3488800	2378100
P13073;H3BNI5;Q86WV2;H3BN72;H3BNV9	Cytochrome c oxidase subunit 4 isoform 1, mitochondrial	COX4I1	3144500	0	0	0	0	0	0	0	0	0	0	0	0	0	0	285860	0	0	150270	0	149810	0	0	0	0	0	0	621450	471540	635430
P13473	Lysosome-associated membrane glycoprotein 2	LAMP2	19817000	14678000	0	0	0	0	8977900	0	3314700	0	0	0	13502000	11405000	25115000	919960	625030	0	0	43262	40190	325930	36916	116450	0	0	0	349670	407580	460780
P13489;H0YCR7;E9PMJ3;E9PLZ3;E9PIM9;E9PIK5;E9PMA9;E9PMN0;E9PR82;E9PMI1	Ribonuclease inhibitor	RNH1	97337000	78546000	42741000	96108000	88713000	85873000	74300000	31805000	42546000	44384000	49307000	55744000	86118000	55824000	85607000	5080100	3326100	904290	1476700	1590000	1703500	1679700	763070	709180	590660	649130	673560	1673900	1343400	1467700
P13639;K7EJ74	Elongation factor 2	EEF2	1387100000	1170800000	902760000	949470000	884050000	878210000	889360000	541390000	662990000	704440000	705820000	797230000	1268900000	964110000	1187400000	40292000	28265000	15273000	9419100	8571000	10884000	13519000	5806900	9867500	5555800	4586000	4884000	10158000	11258000	10912000
P13674	Prolyl 4-hydroxylase subunit alpha-1	P4HA1	60336000	44550000	0	0	0	46836000	63295000	0	0	0	0	27690000	71170000	64967000	84771000	2364100	1901000	208890	0	453760	574960	1483100	555210	470920	56727	74678	119290	1552800	1177500	1077000
P13797;A0A0A0MSQ0;H7C4N2;P13796;U3KQI3;Q5TBN3;Q14651;C9JAM8	Plastin-3	PLS3	289090000	221860000	151270000	253140000	221760000	240080000	231680000	85386000	87833000	148770000	140830000	172960000	210020000	152430000	237400000	8993200	6055900	2447500	3145800	2366100	3315800	3876300	896100	1456700	1737200	1385100	1659400	2704200	1922600	2028800
P13804;H0YLU7;H0YK49;H0YNX6;H0YL12;H0YKF0;H0YL83;H0YM12;J3KN60	Electron transfer flavoprotein subunit alpha, mitochondrial	ETFA	43879000	48679000	15876000	13747000	12230000	14088000	9812000	0	0	22980000	0	10045000	34279000	53562000	39394000	1582600	1455800	595930	222310	341230	1453100	127830	53637	83100	553590	121790	163940	474430	1531600	677980
P14174	Macrophage migration inhibitory factor	MIF	0	0	0	0	0	0	0	0	0	0	0	0	0	0	97124000	26975000	15757000	3811200	4353000	5405200	7275500	17594000	7467400	7598900	2832000	1810000	2105000	8794400	5436400	7707000
P14324;A0A087WTP2;A0A087X1D8;A0A087X090;A0A087WVN4	Farnesyl pyrophosphate synthase	FDPS	9433300	0	0	0	0	0	0	0	0	0	0	0	0	0	0	524070	0	0	0	0	0	0	0	0	0	0	0	0	0	0
P14550	Alcohol dehydrogenase [NADP(+)]	AKR1A1	10992000	12612000	0	0	0	0	14716000	0	0	0	0	0	17624000	15722000	0	464340	473200	282770	217650	166680	217970	349880	342440	361270	213360	183280	225880	415800	353260	104910
P14618;B4DNK4	Pyruvate kinase PKM;Pyruvate kinase	PKM	7084500000	5730200000	3484900000	3668100000	3277600000	3776300000	5938300000	5186900000	5481100000	3659700000	3396200000	3267300000	6233000000	4945100000	5889300000	200290000	151440000	69682000	46647000	44177000	59695000	111570000	113420000	118200000	46475000	35451000	37234000	78440000	86332000	71721000
P14625;Q96GW1;A0A1W2PRR1;Q58FF3;H0YIV0;F8W026;F8VPC7	Endoplasmin	HSP90B1	2218200000	1629800000	468770000	531930000	757040000	801680000	1677600000	694270000	728900000	564400000	444700000	468050000	2110500000	1487200000	1994200000	58490000	38207000	5230900	4914400	7457800	9480300	27723000	10369000	11209000	4390800	2469500	3193900	25451000	23817000	22301000
P14866;M0QXS5;A0A3B3ITJ4;M0QYT0;M0R1W6;M0R076;B4DVF8;M0QYL7	Heterogeneous nuclear ribonucleoprotein L	HNRNPL	172350000	147550000	65882000	89835000	104140000	84111000	184660000	154110000	187160000	94667000	74850000	127010000	213550000	163880000	194910000	11249000	6001800	1804900	2117600	2157100	1590600	6201100	6800100	8549100	2128300	907970	1690600	3421400	3976800	4394400
P14868;H7BZ35;C9J7S3;C9JLC1;C9JQM9;H7C278	Aspartate--tRNA ligase, cytoplasmic	DARS	51465000	51818000	46069000	53978000	64179000	47921000	69283000	84440000	89457000	0	47192000	45563000	56106000	44801000	45273000	1578700	1135700	971660	720940	572390	660400	1210800	1968400	1733000	81555	308890	290380	510410	662150	625220
P14923;C9JTX4;C9J826;C9JK18;C9JKY1	Junction plakoglobin	JUP	142880000	267110000	310410000	186360000	201940000	109660000	83166000	179290000	99827000	274130000	330650000	196100000	346870000	284570000	647760000	2902700	4806100	4828900	1545100	1836900	827530	615760	2754500	978730	2540600	2676700	1445200	3109800	3635600	6413800
P15121;E9PCX2;E9PEF9;C9JRZ8	Aldose reductase	AKR1B1	19547000	20337000	0	0	0	0	24481000	0	0	0	0	0	0	0	0	965380	791740	196060	65106	81403	133500	1074300	99218	222290	74754	0	91384	690010	507410	555610
P15407;E9PPX2	Fos-related antigen 1	FOSL1	0	0	0	0	0	0	0	0	0	0	0	7543700	0	0	0	1218400	643900	355570	923750	833030	669190	365370	0	0	379870	290480	328230	0	0	0
P15531	Nucleoside diphosphate kinase A	NME1	63203000	39030000	21026000	0	29799000	30757000	48113000	0	0	0	0	0	49478000	43979000	53468000	8155600	5031000	715490	189330	978050	1126300	3505900	0	785750	535020	0	385040	2720300	2682300	2165700
P15559;B4DLR8;H3BNV2;H3BRK3	NAD(P)H dehydrogenase [quinone] 1	NQO1	292280000	226230000	87376000	81020000	101120000	65026000	156200000	78757000	99553000	64336000	51759000	51056000	317520000	192550000	335090000	32635000	11923000	4133900	3932200	1891400	3540900	7989600	4674000	3632000	1177700	1068700	1732800	9225600	8976600	8402900
P15880;H0YEN5;E9PMM9;E9PQD7;I3L404;E9PPT0;E9PM36;H3BNG3;H0YE27	40S ribosomal protein S2	RPS2	1847700000	1866600000	1955200000	1638300000	1561100000	1546500000	2807100000	4310600000	4687700000	2063000000	2198200000	1703800000	1068300000	1694900000	1143600000	90951000	81402000	69034000	33541000	40580000	40196000	106100000	183670000	191410000	47466000	42411000	42976000	19055000	55964000	26774000
P15924	Desmoplakin	DSP	105310000	308300000	342190000	134730000	252460000	121860000	27913000	244280000	118860000	297980000	343880000	201050000	640490000	314510000	870500000	437110	1181200	782830	170520	341580	180370	82659	2986500	262030	1320200	1204300	282030	1214400	1578800	1665700
Q5TEJ7;P15927	Replication protein A 32 kDa subunit	RPA2	0	0	0	0	0	0	0	0	0	0	0	0	0	0	5877500	0	0	0	0	0	0	245230	0	0	0	0	0	336540	341220	388660
Q96QV6;P16104	Histone H2A type 1-A;Histone H2AX	HIST1H2AA;H2AFX	145060000	263630000	209710000	0	0	0	0	0	0	0	0	0	0	198470000	0	24161000	39679000	23768000	3119300	7552000	10136000	2883500	2220600	2527400	5902900	4002500	9448200	12123000	18787000	13690000
P16152;E9PQ63;A8MTM1	Carbonyl reductase [NADPH] 1	CBR1	135090000	137110000	151160000	128350000	76120000	89971000	85970000	55367000	68895000	88305000	79978000	64713000	129060000	157660000	134570000	7901100	9070700	6135900	3505600	1763800	2654400	2475800	1936900	2775900	2198500	1349500	1372400	3072500	5106700	3402900
P16401	Histone H1.5	HIST1H1B	7377000000	6071700000	19183000000	7330400000	6362000000	8129000000	1890300000	1315900000	1126700000	4135000000	1391400000	2998100000	14673000000	8308200000	13301000000	866300000	638980000	1481300000	400260000	342720000	292780000	139300000	68690000	58003000	112960000	33163000	63847000	622390000	266100000	563840000
P16403	Histone H1.2	HIST1H1C	51442000000	52094000000	134560000000	30143000000	34586000000	64971000000	10675000000	7755400000	5288200000	31468000000	10951000000	27783000000	89012000000	66498000000	83220000000	5744600000	4817200000	8183300000	2916100000	2859800000	4010800000	1141800000	1109000000	807240000	1538400000	555840000	1372300000	4182200000	3608600000	3783200000
P16615;H7C5W9;O14983;Q93084;H3BVB2;H3BTW4	Sarcoplasmic/endoplasmic reticulum calcium ATPase 2	ATP2A2	127190000	117990000	84878000	78022000	85868000	100250000	146520000	223760000	236490000	94840000	115340000	106080000	84961000	81576000	101930000	2563200	1533600	1197500	444180	608150	889810	2241100	5324400	5044800	921240	878720	581800	555600	462020	601870
P16989;A0A0D9SEI8	Y-box-binding protein 3	YBX3	24869000	20622000	0	6982100	12828000	15154000	24366000	36655000	27850000	13154000	10015000	13134000	22726000	17837000	21980000	2473500	1520000	226780	142940	305940	407990	1155100	1965900	1529400	484330	287100	366330	738310	622930	675740
P17066;P48741	Heat shock 70 kDa protein 6;Putative heat shock 70 kDa protein 7	HSPA6;HSPA7	0	0	0	0	0	0	0	0	0	0	0	0	0	0	316940000	7784700	5699300	2281500	1433400	1957200	2236900	3323800	0	0	1160300	1096900	1332800	3551800	3603300	3398600
P17096	High mobility group protein HMG-I/HMG-Y	HMGA1	314160000	373760000	185320000	220600000	411470000	402970000	421330000	287470000	301310000	207660000	96223000	386320000	411250000	267460000	406410000	51227000	55423000	19964000	13774000	35268000	34546000	43146000	36721000	34918000	14087000	4576200	25225000	26644000	21992000	24232000
P17174	Aspartate aminotransferase, cytoplasmic	GOT1	0	4059900	0	0	0	0	0	0	0	0	0	0	0	0	0	336870	167200	0	0	0	0	0	0	0	0	0	0	66791	0	57095
P17252;J3KRN5;P05771	Protein kinase C alpha type;Protein kinase C beta type	PRKCA;PRKCB	5524100	5874000	0	0	0	0	0	0	0	0	0	0	0	0	0	166540	162040	0	0	0	0	0	0	0	0	0	0	0	0	0
P17301;E9PB77;E7EMF1;E7ESP4	Integrin alpha-2	ITGA2	0	0	1507300	0	0	0	0	0	0	0	0	0	0	0	0	75841	51707	22985	0	0	47051	0	0	0	0	34438	45521	96861	54966	96539
P17612;Q15136;A0A087WVC4;A0A0A0MS54;P22694	cAMP-dependent protein kinase catalytic subunit alpha;cAMP-dependent protein kinase catalytic subunit beta	PRKACA;KIN27;PRKACB	0	0	0	0	0	0	0	0	0	19833000	0	0	0	0	0	328790	306960	0	110670	142870	166360	167660	195010	191360	452400	0	93348	83057	135280	103310
P17655;C9JWY7	Calpain-2 catalytic subunit	CAPN2	222820000	164780000	163470000	243040000	194560000	231960000	212710000	111580000	133660000	139340000	147920000	171260000	243250000	166640000	195530000	8402200	5810800	4115200	3045000	2811000	3261800	3795200	2286700	3551000	1897600	1285600	1796300	2271800	2526000	2469500
P17858	ATP-dependent 6-phosphofructokinase, liver type	PFKL	19760000	21703000	0	21431000	19717000	30195000	25449000	20394000	24987000	15489000	16356000	18628000	0	0	17938000	726400	309390	83366	426770	346370	449900	339860	548980	757760	190440	131930	140480	20331	111030	177350
P17931;G3V3R6	Galectin-3;Galectin	LGALS3	56902000	42688000	47108000	0	0	0	0	0	0	0	0	0	62422000	53191000	76732000	7428000	5230300	4132900	173020	221720	0	0	0	0	206520	0	0	2437100	1931900	3451700
P17987;E7EQR6;F5H282;E7ERF2;F5GZ03;F5H136;F5GZI8;F5H676;F5H726;F5GYL4;F5H7Y1	T-complex protein 1 subunit alpha	TCP1	512090000	541930000	490120000	469200000	417430000	370480000	436570000	521410000	522800000	378580000	373510000	344850000	303480000	398880000	360290000	17048000	15553000	12815000	6589900	6072400	5936700	8780500	14462000	12814000	5106500	4187700	3187300	3349100	6944300	3817400
P18077;C9K025;F8WBS5;F8WB72	60S ribosomal protein L35a	RPL35A	856060000	699000000	1061300000	589980000	841840000	727900000	1270300000	2019900000	1846100000	628040000	656250000	746740000	719150000	812460000	545270000	125240000	76257000	112560000	27434000	60334000	48704000	121090000	194450000	227500000	35949000	25133000	32952000	42728000	56547000	30877000
P18084;H7C4W1;H7C5U2	Integrin beta-5;Integrin beta	ITGB5	8609200	7004400	7129800	0	0	0	0	0	0	0	0	0	17180000	0	14207000	336630	200450	85415	0	0	48058	0	26556	52769	35243	30197	36217	116120	68127	98324
P18085;C9JAK5;C9JPM4;U3KQF2;F5H1V1;F5H6T5;F8WDB3	ADP-ribosylation factor 4	ARF4	305430000	331210000	380460000	483100000	399480000	431000000	375830000	338900000	391180000	284390000	317180000	316640000	235100000	282950000	241060000	39027000	33994000	28700000	17540000	14476000	19724000	18846000	21097000	22726000	10529000	9990300	9201900	8275600	13171000	7100600
P18124;A8MUD9;C9JIJ5;C9JZ88	60S ribosomal protein L7	RPL7	2387100000	2546000000	3831200000	2673300000	3472700000	2890300000	5143000000	9082400000	8836100000	3501200000	3455800000	3588900000	1906600000	3207300000	1764600000	217480000	197750000	216500000	91213000	126890000	118110000	286570000	556950000	556290000	132980000	103630000	96401000	65540000	153230000	47791000
P18206;A0A096LPE1	Vinculin	VCL	2340300000	1780300000	1018700000	1263200000	1294000000	1505700000	1184400000	541650000	579080000	964200000	955720000	1152100000	2275100000	1460200000	1928100000	35085000	22434000	8666800	7238000	8385400	10986000	9508200	4428700	4767300	4649100	4055000	4954200	12536000	10429000	10430000
P18583;J3QSZ5	Protein SON	SON	133330000	150320000	162380000	165540000	197800000	213220000	191850000	313120000	285470000	156400000	130260000	145610000	129730000	164780000	115720000	1345700	1812900	1018500	980110	1183700	1432500	1160600	3575600	3516700	917700	557830	763710	457460	1351400	434450
P18669;P15259;Q8N0Y7	Phosphoglycerate mutase 1	PGAM1	770940000	473440000	72078000	147380000	252060000	244250000	677680000	166690000	181790000	107800000	43856000	107140000	747160000	452290000	557450000	62442000	42620000	2431000	4622500	8088600	9730900	32870000	5539600	10043000	2683300	511270	2011900	22330000	18199000	18674000
P18858;M0R0Q7;F5GZ28;B4E135	DNA ligase 1;DNA ligase	LIG1	0	10753000	24349000	0	0	9324400	0	0	0	13528000	13781000	14612000	0	17517000	12334000	212340	289470	533790	30494	0	42804	0	71446	29505	76814	64485	77280	0	180160	70282
P19338;H7BY16;C9JYW2;C9JLB1;C9J1H7;C9JWL1	Nucleolin	NCL	638600000	523430000	271270000	200290000	272240000	229550000	408710000	314440000	270620000	247580000	111310000	184690000	556450000	393560000	485990000	22474000	15239000	3642600	1998200	2807700	3279300	7385300	6148500	6814000	3208100	747540	1143200	6012100	6709600	5340900
P19367;B1AR62;Q2TB90;E9PB90;P52789	Hexokinase-1	HK1	69932000	55018000	58266000	97725000	93945000	95610000	97281000	126400000	211610000	86081000	66252000	117110000	67515000	55290000	51586000	747250	460470	161400	674860	1004200	947780	1469800	2064700	3615000	650070	617910	973150	514870	784230	595720
P19525;F8WBH4;C9JZT2	Interferon-induced, double-stranded RNA-activated protein kinase	EIF2AK2	55805000	60049000	95615000	71812000	74416000	65298000	50066000	69187000	80472000	51769000	58900000	56634000	37404000	69738000	55297000	2944800	2537300	4082100	1381900	1630100	1314000	1109600	2328700	2625500	1049800	983430	966880	561990	1790900	1038000
P20042	Eukaryotic translation initiation factor 2 subunit 2	EIF2S2	83746000	95087000	67514000	77795000	99673000	88661000	113990000	169740000	148850000	81114000	70386000	159630000	66736000	81794000	79964000	3954000	4278400	1643600	1900000	2303300	2567300	3871200	6672700	5459800	840060	968720	2952800	1229400	2306100	1646000
P20073	Annexin A7	ANXA7	163610000	147310000	186490000	213400000	178690000	163130000	43129000	70816000	23990000	117160000	161090000	136120000	96145000	104980000	136750000	7836900	5996500	7092900	4689100	4528900	4321300	1083600	440910	703170	2285100	2975400	2651600	1793300	2495700	2101900
P20290;H0Y9Y1;D6RDG3	Transcription factor BTF3	BTF3	25759000	19556000	0	0	0	0	0	0	0	0	0	0	36778000	30029000	35507000	5453200	3564800	373330	0	0	0	125760	0	0	0	0	0	754790	896500	723510
S4R3Q3;P20336	Ras-related protein Rab-3A	RAB3A	0	0	0	0	0	0	0	4663500	0	0	0	0	0	0	0	834240	624470	284640	0	0	0	0	466670	0	0	0	0	0	0	0
P20337	Ras-related protein Rab-3B	RAB3B	0	0	0	0	4039300	0	0	0	0	0	0	0	0	0	0	259320	257310	148990	0	140200	0	0	0	0	0	0	0	0	0	0
P20618	Proteasome subunit beta type-1	PSMB1	61205000	44328000	0	0	0	0	38470000	0	0	0	0	0	59990000	36812000	62845000	5524000	3224700	173060	0	187820	320980	1049200	200300	199050	0	134810	125050	1392200	1621300	1821300
P20700;E9PBF6;A0A0D9SFE5;A0A0D9SFY5	Lamin-B1	LMNB1	109750000	85318000	22605000	35437000	19802000	34345000	44865000	34582000	56162000	38666000	0	28334000	110020000	60995000	101190000	2826600	2189300	371050	330860	161840	378640	1101500	859260	1259500	403080	0	90409	1514700	1438500	1284000
P20962;F5H7R9;F5GXR3	Parathymosin	PTMS	185640000	128540000	0	20719000	39539000	39003000	113550000	44550000	46683000	24278000	0	0	281370000	139830000	178090000	63186000	41003000	354630	2451100	6614000	7036200	28906000	9624300	9540200	3466500	121400	2119700	33118000	27140000	21584000
P21283;E7EV59	V-type proton ATPase subunit C 1	ATP6V1C1	0	0	0	0	0	0	0	0	0	0	0	3453600	3684700	7874600	3861700	302320	208790	303240	58463	36598	42522	60939	48384	0	31474	30868	45278	56127	148620	62895
P21291;E9PS42;E9PND2;E9PP21	Cysteine and glycine-rich protein 1	CSRP1	41346000	18614000	20217000	79855000	71663000	73783000	55794000	26322000	37588000	47871000	51785000	65423000	47045000	29209000	32170000	4255200	1549100	1068200	2541800	2990800	3047300	2921100	570400	2166600	2171700	1584000	1714600	1855900	1373000	770690
P21333;Q60FE5;A0A087WWY3;F8WE98;H0Y5C6;H0Y5F3;H7C2E7	Filamin-A	FLNA	10723000000	11975000000	16682000000	27765000000	23324000000	24222000000	10295000000	11250000000	13251000000	17886000000	18021000000	22857000000	8859600000	11550000000	11387000000	77816000	77185000	86272000	90291000	81276000	92247000	45047000	57225000	67884000	57434000	47727000	62675000	23666000	48026000	32567000
P21399	Cytoplasmic aconitate hydratase	ACO1	0	0	0	0	0	0	0	0	0	0	0	0	0	0	16338000	159720	173240	38176	0	0	0	0	11822	0	9076.7	36651	0	346650	59004	154340
P21589;Q96B60;H0Y3X5;H0Y7R7	5-nucleotidase	NT5E	178590000	59124000	15540000	25484000	48316000	36399000	42937000	0	11414000	0	0	15224000	66174000	57164000	74235000	4710000	2912300	146220	227940	461660	403070	1101800	54802	153210	0	0	74295	1712900	1609800	1348500
P21796;C9JI87	Voltage-dependent anion-selective channel protein 1	VDAC1	270920000	240910000	357610000	548380000	376720000	391810000	286610000	378490000	683200000	353390000	317620000	310530000	330820000	314180000	344050000	17044000	13964000	16292000	14878000	10489000	13565000	11022000	13520000	27096000	8760100	6769600	5315800	7602400	10345000	7486600
P21964;H7BZ45;E7EMS6;E7EUU8	Catechol O-methyltransferase	COMT	0	0	0	0	0	0	0	4232700	0	0	0	0	0	0	0	284840	295640	0	0	0	53231	364620	197660	183140	115700	0	0	210950	0	0
P21980;A2A299;A2A2A0;A0A087WZC4;A0A087WVW4;A0A087WVS3;P49221;O43548	Protein-glutamine gamma-glutamyltransferase 2	TGM2	907670000	639810000	580060000	591870000	455190000	583010000	422160000	396250000	424370000	487050000	492730000	568890000	762030000	751770000	715060000	29610000	20707000	13851000	7968700	6080400	8920700	6828700	6367200	7053800	5279700	4090400	5376800	9336600	12794000	8974900
P22087;M0QXL5;M0R299;M0R2Q4;M0R0P1;M0R2U2;M0R1H0;M0R2B0	rRNA 2-O-methyltransferase fibrillarin	FBL	537770000	600570000	580640000	488090000	550920000	558080000	598300000	1040900000	920740000	688940000	743040000	590290000	363920000	469960000	427020000	36948000	35218000	25993000	8447500	12388000	15304000	16395000	41719000	32122000	16222000	13587000	10884000	6292200	9909000	7025400
P22102;C9JZG2;C9JKQ7;C9JBJ1;C9JTV6;F8WD69;A0A140TA71	Trifunctional purine biosynthetic protein adenosine-3;Phosphoribosylamine--glycine ligase;Phosphoribosylformylglycinamidine cyclo-ligase;Phosphoribosylglycinamide formyltransferase	GART	55326000	53932000	44210000	41949000	42241000	38834000	41111000	37097000	42680000	22679000	26028000	30312000	32016000	32183000	32584000	1661200	1133400	929270	353380	424520	290270	452650	507140	626560	111510	147260	185050	232470	352240	208800
P22234;E9PBS1;D6RF62	Multifunctional protein ADE2;Phosphoribosylaminoimidazole-succinocarboxamide synthase;Phosphoribosylaminoimidazole carboxylase	PAICS	198580000	184050000	162270000	117360000	86746000	80468000	94083000	53207000	62000000	105640000	97657000	74161000	100850000	73439000	101470000	11690000	10519000	7223400	2691900	1886400	2043600	3124600	1714500	2250500	1926100	1254000	1110100	2140800	1513700	1869300
P22307;H0YF61	Non-specific lipid-transfer protein	SCP2	0	0	0	0	0	0	0	0	0	0	0	0	22416000	0	0	219090	215490	0	0	0	94422	179050	0	92089	0	0	0	346970	140830	100890
P22314;Q5JRR9;Q5JRS0;Q5JRR6;Q5JRS1;Q5JRS3;Q5JRS2	Ubiquitin-like modifier-activating enzyme 1	UBA1	580610000	517220000	583240000	589440000	342230000	365910000	267410000	92289000	119160000	266090000	279310000	246160000	441710000	428110000	489710000	10735000	9163300	8417500	4586000	2625000	3760600	3191500	958220	1077300	2134500	1657200	1639500	2992900	4798900	3738100
P22492	Histone H1t	HIST1H1T	21655000	0	0	0	0	16126000	0	0	0	0	0	0	73160000	29630000	33765000	1463800	824450	1687200	0	0	644010	4086800	344520	99398	0	0	84521	2673100	2510500	2079200
P35326;P35325;P22532;P22531;Q9BYE4;Q96RM1	Small proline-rich protein 2A;Small proline-rich protein 2B;Small proline-rich protein 2D;Small proline-rich protein 2E;Small proline-rich protein 2G;Small proline-rich protein 2F	SPRR2A;SPRR2B;SPRR2D;SPRR2E;SPRR2G;SPRR2F	0	17709000	21415000	0	18899000	0	0	0	0	20714000	42531000	16463000	30460000	29468000	25382000	709690	2396600	2340200	329310	1339700	129940	0	730420	308960	1407100	2358900	953680	2122400	2977400	1703700
P22626;A0A087WUI2	Heterogeneous nuclear ribonucleoproteins A2/B1	HNRNPA2B1	916570000	618060000	66971000	104080000	203920000	192960000	560740000	168650000	170420000	95047000	55309000	67599000	853580000	509790000	810060000	52311000	31735000	2438000	1994600	4716300	4931500	18960000	4989400	6248200	1604600	498660	723420	17684000	14278000	14300000
P23246;H0Y9K7	Splicing factor, proline- and glutamine-rich	SFPQ	268450000	245020000	121100000	89288000	117900000	125780000	440570000	575070000	578160000	155500000	134420000	177600000	341680000	273860000	363710000	7806100	7457300	2688800	895910	1649200	2120300	7968400	14314000	14909000	2918300	2285700	2822600	3788200	5716500	5632000
P23284	Peptidyl-prolyl cis-trans isomerase B	PPIB	220340000	191340000	79643000	78173000	77764000	80996000	139710000	68842000	85140000	72744000	56869000	59446000	190490000	146280000	203280000	16363000	15441000	5028500	3302200	1879100	3661900	9509000	3012100	5577900	1638600	1088600	1210700	6920000	6339000	7930500
P23381;G3V3Y5;G3V3H8;G3V277;H0YJP3;G3V227;G3V3P2;G3V3S7;G3V2Y7;G3V456;G3V5U1;G3V423;G3V3X0;G3V5W1;G3V4N8;G3V4C7;G3V2C0;G3V339;G3V313;G3V4S4;G3V3R3;G3V2F2;P78534;G3V4N0;G3V4Q0;G3V4A3;G3V5H5	Tryptophan--tRNA ligase, cytoplasmic;T1-TrpRS;T2-TrpRS	WARS	144650000	93135000	54051000	38428000	36095000	32440000	41142000	43977000	50906000	20102000	17724000	20700000	91692000	103080000	113800000	7816500	5107400	2760500	706830	818280	552600	1370700	1173400	839490	190400	209140	182070	1225900	1747400	1642700
P23396;E9PL09;E9PPU1;H0YEU2;F2Z2S8;H0YCJ7;H0YF32;E9PQ96;E9PJH4;E9PK82;E9PSF4;E9PQX2;H0YES8;E9PJN9	40S ribosomal protein S3	RPS3	1510100000	1665400000	2010700000	1771200000	1590100000	1533500000	1509500000	2317500000	2472700000	1622700000	1893600000	1699500000	1178700000	1569200000	1287300000	72330000	82956000	74353000	37390000	33972000	43949000	48550000	90510000	96569000	34656000	34903000	31801000	22065000	47910000	24692000
P23490	Loricrin	LOR	0	0	0	0	0	0	0	0	0	0	0	0	0	9228900	0	0	0	0	0	0	0	0	0	0	0	0	0	0	1722600	0
P23526	Adenosylhomocysteinase	AHCY	72256000	65992000	0	25011000	30546000	0	0	0	0	0	0	0	47572000	30285000	35541000	4248800	2444300	484810	534010	499930	267760	227190	271510	106020	186150	0	0	1042600	922770	660580
Q16778;P33778;P23527;Q96A08;Q6DRA6;Q6DN03	Histone H2B type 2-E;Histone H2B type 1-B;Histone H2B type 1-O;Histone H2B type 1-A	HIST2H2BE;HIST1H2BB;HIST1H2BO;HIST1H2BA	562790000	652440000	533730000	523440000	781960000	728490000	1051100000	1251700000	1039200000	661870000	578840000	718650000	335640000	332230000	511030000	74237000	86002000	52074000	29688000	52185000	58061000	94787000	130320000	116150000	38444000	27628000	34392000	15357000	21732000	24656000
P23528;G3V1A4;E9PK25;E9PP50;E9PQB7;E9PLJ3;E9PS23	Cofilin-1	CFL1	2150300000	1610500000	598680000	1113400000	1125000000	1283400000	1933300000	709810000	778590000	651500000	539830000	717890000	1936500000	1343300000	1969300000	215810000	144630000	42682000	44822000	45361000	65313000	122770000	50961000	54314000	27783000	19053000	23996000	82135000	74169000	80993000
P23921;E9PL69;E9PP77;H0YCY7	Ribonucleoside-diphosphate reductase large subunit	RRM1	73540000	46368000	71290000	0	0	0	0	0	0	29312000	0	24608000	0	0	28577000	1697500	1515100	1263800	95382	48308	0	0	0	0	129530	67363	166670	0	23994	85076
P24390;M0R1Y2	ER lumen protein-retaining receptor 1	KDELR1	15048000	9914200	0	16665000	17469000	11309000	23562000	19177000	26920000	18702000	0	26634000	18062000	13123000	9294500	1601300	1006100	204090	1396600	1214900	712090	2998300	3383100	2949200	797140	631650	1100200	773960	757320	446790
P24534;F2Z2G2;C9JZW3;F8WF65	Elongation factor 1-beta	EEF1B2	138610000	104410000	13432000	17693000	28252000	28964000	106520000	29689000	18213000	13605000	0	31647000	119350000	41500000	100720000	9378900	8495000	833290	695550	1296900	2600900	4624700	1151000	1193300	494120	146690	667230	3601900	2681700	3393500
P24539;Q5QNZ2	ATP synthase F(0) complex subunit B1, mitochondrial	ATP5F1	32191000	20466000	10971000	12351000	0	0	14214000	0	0	0	0	0	50741000	31236000	47635000	3566600	1474000	348010	263970	77006	94360	489030	173000	180580	83751	54123	123470	876250	1212700	862840
P24821;E9PC84	Tenascin	TNC	152970000	150970000	228360000	110520000	158020000	199500000	374480000	553920000	681800000	165410000	168960000	157390000	214160000	219220000	192370000	1186100	1019300	1405200	313480	470240	607950	2774700	4737400	5932500	556880	367230	363730	794840	1170400	556990
P24844;J3KTJ1	Myosin regulatory light polypeptide 9	MYL9;MYL12A	20677000	13566000	0	0	0	0	0	0	0	0	0	0	0	0	0	2257300	1401900	171590	0	338510	390380	1460600	711700	352750	133030	0	0	646520	210390	530700
P25398	40S ribosomal protein S12	RPS12	188720000	88553000	52662000	24783000	48627000	81446000	85599000	0	53689000	24369000	0	0	81853000	52079000	66298000	30424000	17035000	3603500	1676400	2838600	3354400	9353500	2504900	5480400	1240700	170890	0	5101200	2933900	4490600
P25685;M0R1D6;M0QZD0;M0QYT3;M0QXK0;M0R080;M0R128;A0A1B0GX60	DnaJ homolog subfamily B member 1	DNAJB1	9704900	10555000	9988600	12388000	0	0	0	12697000	0	0	0	0	0	0	0	522870	461320	335560	296610	167870	109880	141280	582680	243970	0	42832	59609	93883	131300	89178
P25705;K7EK77;K7ERX7;K7EJP1;K7ENJ4;K7EQH4;K7ESA0	ATP synthase subunit alpha, mitochondrial	ATP5A1	4123500000	4615100000	7582200000	4485200000	3185800000	3216500000	1218100000	1283000000	1622800000	3801500000	3299800000	2548800000	3730700000	6090400000	5137400000	130130000	130680000	167860000	63361000	43681000	53115000	23201000	25050000	33514000	53239000	36874000	29038000	49559000	125780000	71605000
P25786;F5GX11;B4DEV8;F5H112	Proteasome subunit alpha type-1;Proteasome subunit alpha type	PSMA1	117410000	113290000	44499000	20036000	27710000	27929000	54929000	23220000	20808000	0	0	20244000	158410000	71141000	63608000	8560600	5364000	2031000	853200	1181100	610520	2135100	2067100	425210	136150	98838	165590	2330300	2616100	2140800
P25788;G3V4X5	Proteasome subunit alpha type-3	PSMA3	61558000	40800000	0	0	0	0	23633000	0	0	0	0	0	47018000	21576000	28941000	3256500	2199400	33427	92796	0	0	1425600	642770	0	0	0	0	1621700	1002000	1279800
P26006;D6R9X8;K7EMU3;H0YA49;H0YA32	Integrin alpha-3;Integrin alpha-3 heavy chain;Integrin alpha-3 light chain	ITGA3	189650000	97230000	75611000	82185000	74151000	111970000	56756000	39114000	48693000	116940000	118600000	126620000	97513000	50975000	80415000	5135800	2742000	1276200	739370	1235400	1679800	779350	707980	924470	1355600	1162000	978650	806480	564340	647830
P26038;V9GZ54;E9PNP4	Moesin	MSN	4888300000	4615200000	5076600000	5247300000	3956600000	4020900000	2700000000	2463300000	2586900000	4440300000	3914100000	3306000000	3132800000	3762500000	3543200000	151510000	131750000	107360000	67278000	52864000	62764000	44974000	47117000	53034000	57740000	42349000	37508000	40590000	63527000	44514000
P26196;Q8IV96	Probable ATP-dependent RNA helicase DDX6	DDX6	46085000	40311000	50333000	61560000	44010000	35344000	34616000	43122000	46400000	35875000	42662000	32864000	28750000	39438000	40195000	1442500	1448200	910070	751080	545180	387830	670260	766800	1806200	633150	647640	647350	284890	962530	608230
P26232;C9IZ88;C9J144	Catenin alpha-2	CTNNA2	0	14402000	18411000	0	0	0	0	0	0	0	0	13686000	0	25430000	0	59472	279310	249570	54402	82993	99597	87705	46080	75319	130960	66098	96392	12014	307760	124280
P26358;K7ENW7;K7ENQ6;K7EJL0;K7ERQ1;K7EMU8;K7ELB1	DNA (cytosine-5)-methyltransferase 1	DNMT1	15211000	11321000	5126900	11059000	17676000	20684000	100880000	329230000	326680000	39037000	24791000	28149000	0	7359900	3158800	252650	200970	92782	121490	160650	193440	883120	2565900	2474700	334260	162310	238300	319710	53421	19432
P26373;J3QSB4;H3BTH3;J3KS98	60S ribosomal protein L13	RPL13	1207300000	1478000000	1156200000	1526200000	2608500000	2100800000	3477800000	4402500000	4770300000	3623800000	4796000000	3336500000	950180000	1006700000	933770000	112280000	134970000	77301000	60704000	135880000	105850000	214070000	329830000	404060000	191810000	207170000	151910000	28399000	54351000	37549000
P26583;D6R9A6	High mobility group protein B2	HMGB2	60689000	57460000	0	0	0	0	0	0	0	0	0	0	0	44460000	0	12194000	7799200	0	0	0	0	1478500	0	0	0	0	0	3751700	3526900	1436100
P26639;B7ZLP8;A2RTX5	Threonine--tRNA ligase, cytoplasmic	TARS	38142000	24730000	0	0	0	0	0	0	0	0	0	0	0	0	0	986370	462600	64326	11565	47573	0	176330	0	0	43428	0	44822	111310	53825	0
P26640;A0A140T936;A2ABF4;A0A0G2JJT9;A0A140T954;A0A140T904;H0Y426	Valine--tRNA ligase	VARS	44333000	29155000	28197000	27035000	0	0	22198000	21445000	25683000	26512000	27805000	17689000	31622000	29058000	22887000	628370	508700	388580	282080	117310	69961	224190	186560	335550	226440	72809	84787	118530	337680	209640
P26641	Elongation factor 1-gamma	EEF1G	275970000	222350000	106500000	90924000	109500000	93067000	161060000	59944000	71428000	73807000	71283000	72238000	245780000	149130000	221310000	13527000	10831000	2781500	1127700	1300400	1932300	3443400	1521800	1637500	742760	694270	850180	5054400	3639000	4037400
P27348;E9PG15	14-3-3 protein theta	YWHAQ	377630000	307590000	234050000	322750000	279500000	334810000	311560000	152260000	204060000	189180000	183660000	212800000	445320000	272960000	346640000	31552000	23394000	10921000	9154500	9489300	12485000	14156000	7617400	9581800	5319200	4214700	5032400	11864000	11530000	8200700
X1WI28;P27635;B8A6G2;A6QRI9	60S ribosomal protein L10	RPL10	843550000	878860000	824720000	755640000	903990000	860280000	1507100000	2116900000	1992200000	1344600000	1424800000	1138500000	532490000	741140000	496530000	105770000	106010000	77667000	35830000	49508000	52010000	116430000	186020000	164870000	77947000	70003000	49909000	19063000	50279000	23171000
P27695;G3V5Q1;G3V3M6;A0A0C4DGK8;G3V3C7;G3V5D9;H7C4A8;G3V5M0;G3V359;G3V3Y6	DNA-(apurinic or apyrimidinic site) lyase;DNA-(apurinic or apyrimidinic site) lyase, mitochondrial	APEX1	50873000	35271000	27234000	0	0	0	45850000	0	0	0	0	0	64678000	46367000	71332000	3221100	1723800	518990	0	235420	0	2185900	0	584230	0	0	0	2067700	1920600	2465300
P27797;K7EJB9;K7EL50	Calreticulin	CALR	774720000	511150000	42200000	60210000	158670000	222740000	843170000	171250000	203860000	80408000	12038000	72588000	751960000	548790000	669380000	35618000	25353000	1528200	1317800	3543800	4997500	23844000	5348200	6820700	1942000	170080	1207300	14061000	12743000	13293000
P27824;D6RFL1;H0Y9Q7;H0Y9H1;D6RGY2;D6RHJ3;D6RD16;D6RAQ8;D6RAU8;D6RB85;D6RDP7	Calnexin	CANX	194510000	150220000	18065000	33969000	36846000	40196000	137350000	27211000	34042000	22314000	15333000	24521000	231340000	125780000	141490000	5439700	3941700	574200	333200	702160	882470	2671300	628670	701780	340450	134730	225950	3006400	2410900	1937900
P28066	Proteasome subunit alpha type-5	PSMA5	48722000	0	0	0	0	18226000	23633000	0	15469000	0	0	0	46706000	21436000	53309000	3384000	3894300	0	124560	287880	373150	1838700	255630	507250	141380	0	92168	2091200	1708300	1749800
P28070	Proteasome subunit beta type-4	PSMB4	0	0	0	0	0	0	0	0	2933300	0	0	0	0	0	0	1424600	1192900	0	71407	0	270600	427380	0	187400	0	0	0	0	0	0
P28072;A0A087X2I4;I3L3X7	Proteasome subunit beta type-6;Proteasome subunit beta type	PSMB6	59276000	47149000	0	0	0	0	0	0	0	0	0	0	75766000	0	63851000	5828600	4199600	196460	0	250820	355650	574560	231500	217670	0	0	0	2465200	592170	2195300
P28074;H0YJM8	Proteasome subunit beta type-5	PSMB5	38627000	29481000	0	0	0	0	0	0	0	0	0	0	0	0	0	2570700	1784600	0	0	0	0	278850	0	257550	0	0	0	672240	442770	317020
P28482	Mitogen-activated protein kinase 1	MAPK1	0	0	0	0	0	0	0	0	0	0	0	0	0	0	6957900	83223	0	0	0	0	0	0	0	35736	0	37059	0	73915	77942	125480
P29317;J3KR66;Q96L35;A0A0B4J1T8;P54760;Q15375;P54753;Q9UF33	Ephrin type-A receptor 2	EPHA2	56186000	42857000	41122000	41147000	51222000	61869000	49912000	34578000	36870000	61687000	56237000	58258000	40016000	35640000	48162000	1462700	1062700	705470	508150	722440	530120	458560	604800	617170	568720	512530	390920	200270	286750	285060
Q5T187;X6R6D0;P29353;Q5T188;Q5T182	SHC-transforming protein 1	SHC1	0	0	0	0	0	0	0	0	0	0	0	0	0	0	2583800	1478400	1512900	1347000	446280	0	46427	0	0	0	245830	0	316680	0	0	205030
P29401;A0A0B4J1R6;E9PFF2;F8W888;F8WAX4	Transketolase	TKT	919380000	642240000	148660000	224350000	242020000	202820000	370550000	234550000	251040000	199500000	180870000	205460000	1010700000	564610000	773250000	44814000	27721000	2642900	2869300	3657800	4472600	7969600	6194700	6806300	2207900	2055600	1896500	15986000	13664000	12996000
P29536;Q9BV00	Leiomodin-1	LMOD1	0	10470000	0	13797000	14128000	7961800	0	0	17715000	0	0	0	0	0	0	120240	189620	107650	217110	236820	114140	0	319760	562340	185200	110320	104830	39571	144470	23184
P29966	Myristoylated alanine-rich C-kinase substrate	MARCKS	282750000	226760000	171370000	132330000	161380000	175590000	268320000	101750000	99891000	103590000	93555000	140830000	368700000	239950000	301230000	26646000	15651000	7806700	3519300	5016400	6167700	11304000	4251900	4529900	2686000	1981900	3244000	10657000	9403200	8327200
P30040;F8VY02;F8W1G0	Endoplasmic reticulum resident protein 29	ERP29	53018000	36941000	0	0	27016000	27633000	34455000	21971000	23437000	29230000	0	12872000	79596000	34207000	39096000	4191500	2076200	115510	97065	1026700	1071000	1973800	1487200	1434900	845640	0	88588	1960100	1395600	821120
P30041	Peroxiredoxin-6	PRDX6	801810000	741160000	660310000	643580000	528610000	630470000	340320000	234460000	316300000	504050000	408960000	345130000	502700000	574690000	545650000	62385000	50889000	35079000	17075000	15187000	16790000	10841000	10443000	13509000	11441000	8880600	7077300	14691000	23041000	14831000
P30044	Peroxiredoxin-5, mitochondrial	PRDX5	45258000	30252000	14668000	16533000	20357000	19407000	32596000	8470800	17926000	0	9235600	10018000	42581000	32147000	41625000	3189100	1949800	1034500	670020	732210	1134600	1969800	324310	661070	246700	239160	240170	1324100	1350800	1339600
P30048	Thioredoxin-dependent peroxide reductase, mitochondrial	PRDX3	109220000	113830000	17001000	29312000	31958000	31933000	81051000	26834000	34973000	0	0	0	115130000	50012000	88291000	8914500	6072000	461610	323910	313280	827920	3705400	706180	1629700	44257	38047	42512	4230800	1589800	3215100
P30049	ATP synthase subunit delta, mitochondrial	ATP5D	0	0	0	0	0	0	0	0	0	0	0	0	0	0	50222000	0	2209700	0	0	372620	387080	1864200	0	750080	274230	0	299650	2991400	2298300	3985200
P30050	60S ribosomal protein L12	RPL12	722860000	906050000	1839200000	1115900000	642900000	639700000	215200000	151700000	213710000	1053300000	1098000000	908670000	598410000	769890000	735700000	77239000	89399000	140290000	54916000	33766000	38529000	14124000	11292000	17684000	48175000	41897000	36635000	23755000	48534000	27570000
P30084	Enoyl-CoA hydratase, mitochondrial	ECHS1	48332000	22037000	0	13392000	0	20962000	28406000	0	20869000	0	0	0	99322000	38907000	97767000	2407000	1455200	112100	199180	108040	352680	1332100	0	367590	204360	84835	87539	1913400	1789600	2243000
P30085;Q5T0D2;A0A494BXC7	UMP-CMP kinase	CMPK1	28329000	16655000	0	0	0	8381900	16063000	0	0	0	0	0	18186000	14398000	19474000	1783700	1322500	97683	0	239970	356720	1245600	323520	274350	0	29323	99409	977960	529230	638230
P30086	Phosphatidylethanolamine-binding protein 1;Hippocampal cholinergic neurostimulating peptide	PEBP1	372190000	242540000	29098000	73980000	109700000	99740000	283090000	67049000	89134000	42169000	32152000	49064000	367120000	191600000	276130000	37777000	21739000	1938400	3377400	3390200	5396400	15543000	2971500	4647100	1651300	1043900	2089000	15872000	11440000	12288000
P30101	Protein disulfide-isomerase A3	PDIA3	639980000	457870000	123380000	189310000	255260000	272330000	572080000	235870000	243400000	184240000	122630000	170970000	656250000	524380000	603110000	25745000	15078000	1422000	2375600	3687400	3499200	12656000	4201800	4518800	1970400	1227700	1905500	10028000	11030000	9523500
P30153;B3KQV6;C9J9C1;P30154;E9PH38;H0YDG7;E9PPI5;E9PNM7;E9PHZ6	Serine/threonine-protein phosphatase 2A 65 kDa regulatory subunit A alpha isoform	PPP2R1A	175750000	175710000	207420000	219780000	131240000	151660000	92694000	58533000	74690000	125750000	132520000	150270000	168300000	184920000	190430000	6666000	5153800	5522500	2883600	2090800	2172500	1894900	1131700	1463900	1446000	1255700	1625900	2043200	3172500	2057200
P30419;K7EN82;B7Z8J4;K7EN42	Glycylpeptide N-tetradecanoyltransferase 1	NMT1	41024000	25106000	39690000	0	0	0	0	0	0	0	0	0	0	0	0	1994300	1426700	1008700	0	0	0	243380	333110	289540	101590	0	88496	0	88879	0
P30533;A0A3B3IRQ7	Alpha-2-macroglobulin receptor-associated protein	LRPAP1	0	0	0	0	0	0	0	0	0	0	0	0	0	0	12506000	282760	241140	0	100790	189510	181910	284310	149330	0	82708	89212	64497	282890	184970	248110
P31150;G5E9U5	Rab GDP dissociation inhibitor alpha	GDI1	0	0	0	0	0	0	0	0	0	0	0	0	0	0	0	0	0	0	0	0	0	0	0	0	0	0	0	0	0	0
P31151;Q86SG5	Protein S100-A7	S100A7	0	0	0	0	0	0	19754000	0	0	0	0	0	20931000	0	0	365920	427810	0	0	0	635180	1754000	1198400	0	449810	504890	385560	1152000	0	521780
P31153;Q00266	S-adenosylmethionine synthase isoform type-2	MAT2A	32754000	26915000	0	19222000	19960000	22685000	19664000	0	0	0	0	0	27905000	17937000	19566000	2005900	1552300	0	359260	508740	634120	602890	0	0	103800	69972	51249	577600	534570	428610
P31689	DnaJ homolog subfamily A member 1	DNAJA1	0	0	0	0	0	0	0	0	0	0	0	0	16856000	16587000	17703000	144700	92147	0	0	0	0	0	0	147980	62079	0	57262	306740	428560	348150
P31930	Cytochrome b-c1 complex subunit 1, mitochondrial	UQCRC1	12628000	0	0	0	0	0	0	0	0	0	0	0	16802000	0	0	525490	178660	0	0	0	0	0	0	0	0	0	0	271170	67957	77403
P31937;H7BZL2	3-hydroxyisobutyrate dehydrogenase, mitochondrial	HIBADH	9488100	0	0	0	0	0	0	0	0	0	0	0	0	0	0	729850	83361	0	0	0	0	0	0	0	0	0	0	0	0	0
P31939;H7C1S2;F8WEF0;C9JLK0	Bifunctional purine biosynthesis protein PURH;Phosphoribosylaminoimidazolecarboxamide formyltransferase;IMP cyclohydrolase	ATIC	45034000	38058000	0	0	15041000	0	34467000	16059000	19721000	19932000	0	0	33466000	23761000	31287000	2114500	1504300	0	40845	45259	0	487770	164820	263450	67484	0	15835	370140	195800	214450
P31942	Heterogeneous nuclear ribonucleoprotein H3	HNRNPH3	62084000	47683000	13734000	18416000	24861000	28814000	38271000	22465000	0	15543000	15366000	20703000	71912000	40955000	51982000	4892300	3209000	817950	949290	683990	386040	844900	1035700	1553400	197380	155040	572980	1405100	1933400	1903300
P31944	Caspase-14;Caspase-14 subunit p17, mature form;Caspase-14 subunit p10, mature form;Caspase-14 subunit p20, intermediate form;Caspase-14 subunit p8, intermediate form	CASP14	19033000	70973000	47736000	0	20627000	34749000	33092000	24604000	30711000	53714000	210190000	64155000	86299000	47960000	74535000	1088500	3773500	1757300	216000	479200	1245800	1799700	1307900	1127300	1410600	5532000	2001900	1927100	2015100	1268100
P31946;Q4VY20;A0A0J9YWZ2;Q4VY19;A0A0J9YWE8	14-3-3 protein beta/alpha;14-3-3 protein beta/alpha, N-terminally processed	YWHAB	427140000	291670000	74597000	127720000	115810000	124870000	297960000	110060000	113690000	66963000	80558000	86468000	454480000	314080000	376230000	20016000	19273000	5900400	3681600	6643200	4960700	9414100	6283100	5647800	5166700	3859000	3418500	12590000	13350000	11311000
P31947	14-3-3 protein sigma	SFN	0	0	0	0	0	0	0	0	0	0	0	0	0	105690000	194990000	12693000	8836800	3019800	1993200	2468600	2766800	5521100	0	0	1300200	967790	0	4792900	4393000	4343700
P31948;F5H783;F5GXD8;H0YGI8	Stress-induced-phosphoprotein 1	STIP1	182280000	94407000	10855000	30930000	78073000	28591000	124010000	25125000	24879000	23165000	23110000	20462000	104200000	35750000	89918000	5126200	2831500	107520	401140	537300	537680	1978000	354280	616450	285790	227710	258100	1355400	807170	936880
P31949	Protein S100-A11;Protein S100-A11, N-terminally processed	S100A11	227620000	167460000	34521000	65796000	59613000	59375000	173310000	44016000	44504000	38753000	42962000	40312000	265800000	86331000	284760000	45937000	29161000	5194700	2937200	8029900	7327000	16740000	5573600	5992600	4500000	2616600	4650600	19388000	15118000	20174000
P32119;A6NIW5	Peroxiredoxin-2	PRDX2	75745000	68383000	28002000	29078000	27967000	49197000	61244000	18795000	21859000	37614000	50342000	33405000	125920000	86335000	112810000	6243100	4470200	1709200	676730	1220000	1690900	3844800	790500	987300	1233500	1076200	855430	3169700	3254700	4313200
P32456;P32455	Interferon-induced guanylate-binding protein 2;Interferon-induced guanylate-binding protein 1	GBP2;GBP1	0	0	0	0	0	0	0	0	0	0	0	0	0	0	4210600	0	0	0	0	0	0	0	0	0	78274	0	0	84025	81056	61874
P32969;A0A2R8Y5Y7;D6RAN4;E7ESE0;H0Y9V9;H0Y9R4	60S ribosomal protein L9	RPL9	690060000	745360000	794890000	812920000	735440000	768480000	870830000	1418600000	1552800000	876650000	844870000	778550000	516080000	643840000	491040000	77052000	77557000	63469000	40746000	39293000	40730000	60790000	116110000	120670000	43465000	32674000	32705000	20120000	38579000	19828000
P33176;A0A0G2JMZ6;J3KNA1;O60282;Q12840	Kinesin-1 heavy chain	KIF5B	27267000	30262000	17228000	21919000	18966000	19411000	20414000	18394000	20678000	17239000	10202000	17397000	27187000	17753000	21181000	712440	397570	92290	110010	213320	117840	175910	159120	225790	190910	36293	75732	261880	124520	123730
P33724;P56539	Caveolin-1 (Canis lupus)	CAV1-A2E	0	0	0	40502000	32966000	29439000	0	17437000	0	31165000	0	34127000	0	0	0	0	0	0	1458100	1321400	1492500	579980	980080	570280	1497700	1106000	1422600	0	0	0
P33764	Protein S100-A3	S100A3	0	0	0	0	0	0	0	0	0	0	0	0	0	0	53434000	0	0	0	0	0	0	0	0	0	0	0	0	0	0	3028700
P33947;H7BYF7;O43731	ER lumen protein-retaining receptor 2	KDELR2	0	0	0	0	14252000	0	14968000	24985000	21642000	0	0	16624000	0	0	10675000	0	0	0	0	889160	481100	1331400	2009400	1779300	587970	433880	713970	241430	407590	523150
[truncated: 982 more rows]
